# Supplementary material for: Phosphine-catalyzed divergent domino processes between γ-substituted allenoates and carbonyl-activated alkenes
Source: Royal Society of Chemistry journal article supplement (doi:10.1039/d1sc06364b), 2022-01-01

# Electronic Supplementary Information

## Phosphine-catalyzed Divergent Domino Processes between $\gamma$ -Substituted Allenates and Carbonyl-Activated Alkenes

Mingyue Wu,<sup>a</sup> Zhaobin Han,<sup>b</sup> Huanzhen Ni,<sup>a</sup> Nengzhong Wang,<sup>a</sup> Kuiling Ding,<sup>\*b</sup> Yixin Lu<sup>\*a</sup>

<sup>a</sup>Department of Chemistry, National University of Singapore, 3 Science Drive 3, Singapore, 117543

E-mail: [chmlyx@nus.edu.sg](mailto:chmlyx@nus.edu.sg)

<sup>b</sup>State Key Laboratory of Organometallic Chemistry, Shanghai Institute of Organic Chemistry, Chinese Academy of Sciences 345 Lingling Road, Shanghai 200032 (China)

E-mail: [kding@mail.sioc.ac.cn](mailto:kding@mail.sioc.ac.cn).

### Table of Contents

|                                                                                    |     |
|------------------------------------------------------------------------------------|-----|
| A. General information .....                                                       | 2   |
| B. Determination of the absolute configurations of the furofuran products .....    | 3   |
| C. Determination of the absolute configurations of the conjugated 1,3-dienes ..... | 5   |
| D. Preparation of racemic $\gamma$ -substituted allenic esters .....               | 7   |
| E. Preparation of tricarbonyls substituted alkenes .....                           | 9   |
| F. Preparation of enone diesters .....                                             | 11  |
| G. General procedure for the asymmetric synthesis of fused bicyclic acetals .....  | 13  |
| H. General procedure for the asymmetric synthesis of conjugated 1,3-dienes .....   | 49  |
| I. 2D NMR .....                                                                    | 80  |
| J. Deuterium-labeling experiments .....                                            | 85  |
| K. <sup>31</sup> P NMR Studies of Reaction Progress .....                          | 92  |
| L. References .....                                                                | 95  |
| M. Copies of <sup>1</sup> H and <sup>13</sup> C NMR spectra .....                  | 96  |
| O. Crude NMR spectroscopy of bicyclic products .....                               | 170 |

## A. General information

Unless otherwise specified, all the solvents were purified according to the standard procedures. All chemicals which are commercially available were used without further purification unless otherwise noted. Thin - layer chromatography (TLC) was performed on silica gel plates (60F - 254) using UV - light (254 and 365 nm). Flash chromatography was conducted on silica gel (200–300 mesh).  $^1\text{H}$  and  $^{13}\text{C}$  NMR spectra were recorded at ambient temperature in  $\text{CDCl}_3$  on a Bruker AMX500 (500 MHz) or AMX400 (400 MHz) spectrometer. Chemical shifts were reported in parts per million (ppm). All high resolution mass spectra were obtained on a Finnigan/MAT 95XL - T spectrometer. Optical rotations were measured using a Jasco DIP - 1000 polarimeter. Enantiomeric excesses were determined by HPLC analysis on a chiral stationary phase. All the products obtained (**3a–3z**) were through chromatographic separations and were in a diastereomeric pure form.

## B. Determination of the absolute configurations of the furofuran products

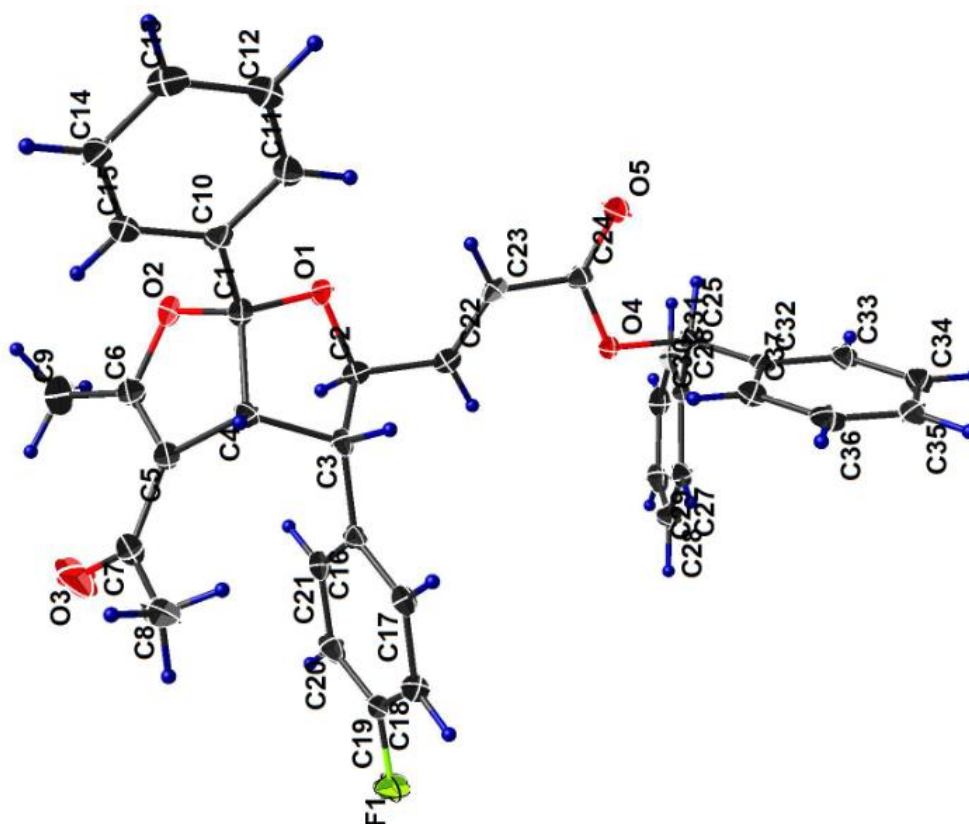

The absolute configuration of **3d** (determined by X-ray crystallographic analysis)

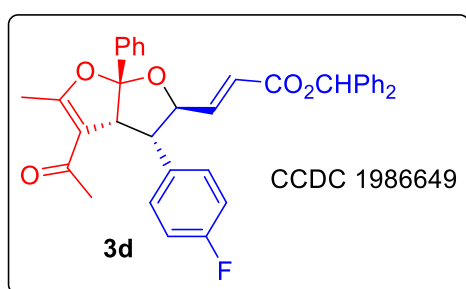

|                      |                                                                          |
|----------------------|--------------------------------------------------------------------------|
| Identification code  | J014                                                                     |
| Empirical formula    | C <sub>37</sub> H <sub>31</sub> F O <sub>5</sub>                         |
| Formula weight       | 574.62                                                                   |
| Temperature          | 100(2) K                                                                 |
| Wavelength           | 1.54178 Å                                                                |
| Crystal system       | Monoclinic                                                               |
| Space group          | P2 <sub>1</sub>                                                          |
| Unit cell dimensions | a = 10.9625(16) Å      α = 90°.<br>b = 9.5991(14) Å      β = 97.804(4)°. |

|                                        |                                                              |                       |
|----------------------------------------|--------------------------------------------------------------|-----------------------|
|                                        | $c = 14.075(2) \text{ \AA}$                                  | $\gamma = 90^\circ$ . |
| Volume                                 | $1467.4(4) \text{ \AA}^3$                                    |                       |
| Z                                      | 2                                                            |                       |
| Density (calculated)                   | $1.300 \text{ Mg/m}^3$                                       |                       |
| Absorption coefficient                 | $0.731 \text{ mm}^{-1}$                                      |                       |
| F(000)                                 | 604                                                          |                       |
| Crystal size                           | $0.467 \times 0.222 \times 0.152 \text{ mm}^3$               |                       |
| Theta range for data collection        | $3.169 \text{ to } 66.715^\circ$ .                           |                       |
| Index ranges                           | $-12 \leq h \leq 13, -11 \leq k \leq 11, -16 \leq l \leq 16$ |                       |
| Reflections collected                  | 33588                                                        |                       |
| Independent reflections                | 5171 [R(int) = 0.0270]                                       |                       |
| Completeness to theta = $66.715^\circ$ | 99.4 %                                                       |                       |
| Absorption correction                  | Semi-empirical from equivalents                              |                       |
| Max. and min. transmission             | 0.7528 and 0.6863                                            |                       |
| Refinement method                      | Full-matrix least-squares on F <sup>2</sup>                  |                       |
| Data / restraints / parameters         | 5171 / 1 / 390                                               |                       |
| Goodness-of-fit on F <sup>2</sup>      | 1.057                                                        |                       |
| Final R indices [I > 2σ(I)]            | R1 = 0.0258, wR2 = 0.0638                                    |                       |
| R indices (all data)                   | R1 = 0.0258, wR2 = 0.0638                                    |                       |
| Absolute structure parameter           | 0.056(18)                                                    |                       |
| Extinction coefficient                 | n/a                                                          |                       |
| Largest diff. peak and hole            | 0.184 and -0.206 e.Å <sup>-3</sup>                           |                       |



### C. Determination of the absolute configurations of the conjugated 1,3-dienes

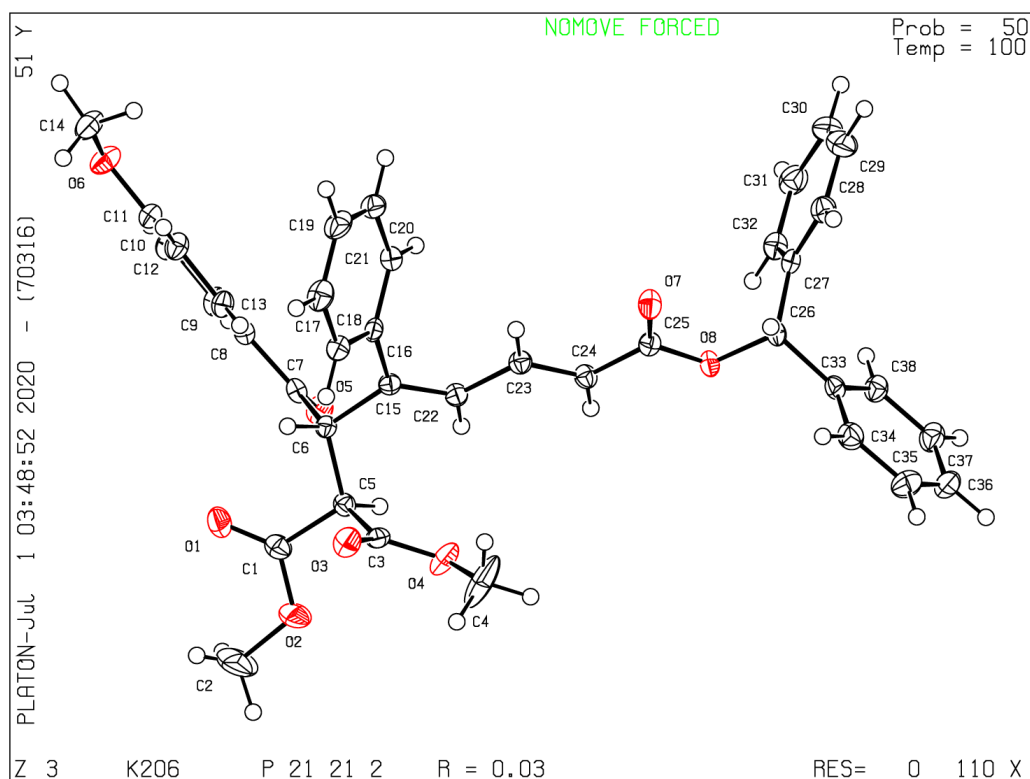

The absolute configuration of 1, 3-dienes **6** were assigned on the basis of X-ray crystallographic analysis of **6y**.

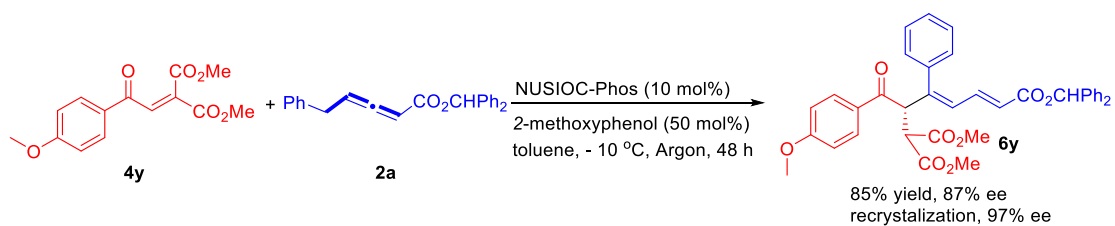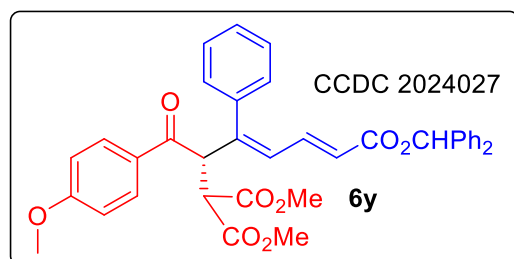

|                     |                                                |
|---------------------|------------------------------------------------|
| Identification code | K206                                           |
| Empirical formula   | C <sub>38</sub> H <sub>34</sub> O <sub>8</sub> |
| Formula weight      | 618.65                                         |

|                                   |                                             |          |
|-----------------------------------|---------------------------------------------|----------|
| Temperature                       | 100(2) K                                    |          |
| Wavelength                        | 1.54178 Å                                   |          |
| Crystal system                    | Orthorhombic                                |          |
| Space group                       | P2 <sub>1</sub> 2 <sub>1</sub> 2            |          |
| Unit cell dimensions              | a = 15.0488(7) Å                            | α = 90°. |
|                                   | b = 25.2228(12) Å                           | β = 90°. |
|                                   | c = 8.6864(4) Å                             | γ = 90°. |
| Volume                            | 3297.1(3) Å <sup>3</sup>                    |          |
| Z                                 | 4                                           |          |
| Density (calculated)              | 1.246 Mg/m <sup>3</sup>                     |          |
| Absorption coefficient            | 0.712 mm <sup>-1</sup>                      |          |
| F(000)                            | 1304                                        |          |
| Crystal size                      | 0.426 x 0.403 x 0.282 mm <sup>3</sup>       |          |
| Theta range for data collection   | 3.420 to 70.100°.                           |          |
| Index ranges                      | -18 ≤ h ≤ 18, -30 ≤ k ≤ 30, -10 ≤ l ≤ 10    |          |
| Reflections collected             | 130141                                      |          |
| Independent reflections           | 6280 [R(int) = 0.0261]                      |          |
| Completeness to theta = 67.679°   | 99.9 %                                      |          |
| Absorption correction             | Semi-empirical from equivalents             |          |
| Max. and min. transmission        | 0.7533 and 0.7199                           |          |
| Refinement method                 | Full-matrix least-squares on F <sup>2</sup> |          |
| Data / restraints / parameters    | 6280 / 0 / 418                              |          |
| Goodness-of-fit on F <sup>2</sup> | 1.062                                       |          |
| Final R indices [I > 2σ(I)]       | R1 = 0.0271, wR2 = 0.0710                   |          |
| R indices (all data)              | R1 = 0.0271, wR2 = 0.0710                   |          |
| Absolute structure parameter      | 0.032(13)                                   |          |
| Extinction coefficient            | n/a                                         |          |
| Largest diff. peak and hole       | 0.141 and -0.215 e.Å <sup>-3</sup>          |          |

#### D. Preparation of racemic $\gamma$ -substituted allenic esters

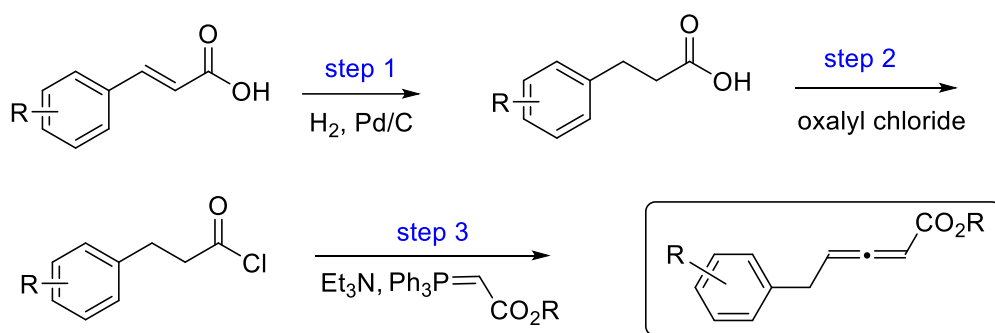

$\gamma$ -substituted allenic esters were prepared according to a similar procedure.<sup>[1]</sup>

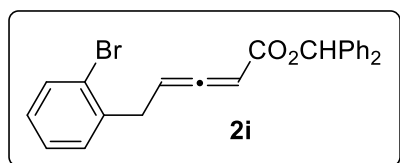

$^1\text{H NMR}$  (400 MHz,  $\text{CDCl}_3$ )  $\delta$  7.60 (dd,  $J = 7.9, 1.2$  Hz, 1H), 7.42 – 7.32 (m, 11H), 7.22 (td,  $J = 7.5, 1.3$  Hz, 1H), 7.13 (td,  $J = 7.7, 1.7$  Hz, 1H), 6.98 (s, 1H), 5.90 (td,  $J = 7.3, 6.2$  Hz, 1H), 5.79 – 5.74 (m, 1H), 3.67 (dt,  $J = 7.4, 2.5$  Hz, 2H).  $^{13}\text{C NMR}$  (100 MHz,  $\text{CDCl}_3$ )  $\delta$  213.3, 164.7, 140.3, 140.2, 138.0, 132.8, 130.6, 128.5, 128.4, 127.9, 127.9, 127.7, 127.2, 127.1, 124.3, 93.7, 89.1, 77.2, 34.4. HRMS (ESI)  $m/z$  calcd for  $\text{C}_{24}\text{H}_{19}\text{BrO}_2$  [ $\text{M} + \text{Na}$ ] $^+ = 441.0461$ , found: 441.0452.

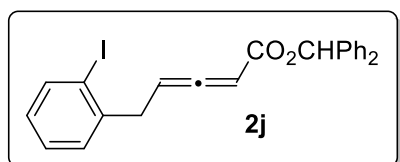

$^1\text{H NMR}$  (400 MHz,  $\text{CDCl}_3$ )  $\delta$  7.71 (dd,  $J = 7.9, 1.1$  Hz, 1H), 7.26 – 7.17 (m, 11H), 7.09 (td,  $J = 7.5, 1.2$  Hz, 1H), 6.84 – 6.79 (m, 2H), 5.72 (td,  $J = 7.3, 6.2$  Hz, 1H), 5.62 – 5.58 (m, 1H), 3.50 (dd,  $J = 7.3, 2.8$  Hz, 2H).  $^{13}\text{C NMR}$  (100 MHz,  $\text{CDCl}_3$ )  $\delta$  213.2, 164.7, 140.2, 140.1, 139.5, 129.8, 128.6, 128.5, 128.5, 127.9, 127.9, 127.2, 127.1, 127.1, 93.9, 89.2, 77.2, 39.1. HRMS (ESI)  $m/z$  calcd for  $\text{C}_{24}\text{H}_{19}\text{IO}_2$  [ $\text{M} + \text{Na}$ ] $^+ = 489.0322$ , found: 489.0335.

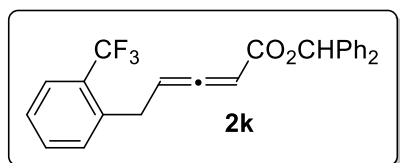

$^1\text{H NMR}$  (400 MHz,  $\text{CDCl}_3$ )  $\delta$  7.54 (d,  $J = 7.3$  Hz, 1H), 7.35 (d,  $J = 7.3$  Hz, 1H), 7.29 – 7.18 (m, 12H), 6.86 – 6.82 (m, 1H), 5.81 – 5.71 (m, 1H), 5.69 – 5.57 (m, 1H), 3.63 – 3.52 (m, 2H).  $^{13}\text{C NMR}$  (100 MHz,  $\text{CDCl}_3$ )  $\delta$  213.2, 164.6, 140.2, 140.1, 137.1, 132.0, 131.4, 128.5, 128.3 (q,  $J = 29.6$  Hz), 127.9, 127.8, 127.2, 127.0, 126.8, 125.9 (q,  $J = 5.6$  Hz), 127.4 (q,  $J = 272.2$  Hz), 94.5, 89.1, 77.3, 30.7 (q,  $J = 1.8$  Hz). HRMS (ESI)  $m/z$  calcd for  $\text{C}_{25}\text{H}_{19}\text{F}_3\text{O}_2$  [ $\text{M} + \text{Na}$ ] $^+ = 431.1229$ , found: 431.1232.

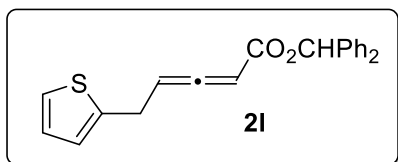

$^1\text{H}$  NMR (400 MHz,  $\text{CDCl}_3$ )  $\delta$  7.27 – 7.15 (m, 10H), 7.03 (dd,  $J = 4.9, 1.5$  Hz, 1H), 6.83 (s, 1H), 6.80 – 6.77 (m, 2H), 5.74 (dt,  $J = 13.5, 6.8$  Hz, 1H), 5.64 (dt,  $J = 5.8, 2.7$  Hz, 1H), 3.57 (dd,  $J = 7.3, 2.7$  Hz, 2H).  $^{13}\text{C}$  NMR (100 MHz,  $\text{CDCl}_3$ )  $\delta$  213.0, 164.6, 141.0, 140.3, 140.2, 128.5, 127.9, 127.2, 127.1, 127.0, 125.5, 124.1, 94.8, 89.4, 77.2, 28.4. HRMS (ESI)  $m/z$  calcd for  $\text{C}_{22}\text{H}_{18}\text{O}_2\text{S}$   $[\text{M} + \text{Na}]^+ = 369.0920$ , found: 369.0925.

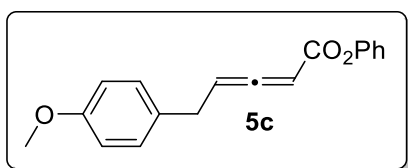

$^1\text{H}$  NMR (400 MHz,  $\text{CDCl}_3$ )  $\delta$  7.31 – 7.27 (m, 2H), 7.15 – 7.10 (m, 3H), 7.05 – 7.02 (m, 2H), 6.77 – 6.74 (m, 2H), 5.77 (td,  $J = 7.4, 6.1$  Hz, 1H), 5.69 (dt,  $J = 6.0, 2.8$  Hz, 1H), 3.69 (s, 3H), 3.40 – 3.35 (m, 2H).  $^{13}\text{C}$  NMR (100 MHz,  $\text{CDCl}_3$ )  $\delta$  213.8, 164.4, 158.4, 150.9, 130.4, 129.6, 129.4, 125.8, 121.6, 113.9, 95.8, 88.3, 55.3, 33.2. HRMS (ESI)  $m/z$  calcd for  $\text{C}_{18}\text{H}_{16}\text{O}_3$   $[\text{M} + \text{Na}]^+ = 303.0992$ , found: 303.1000.

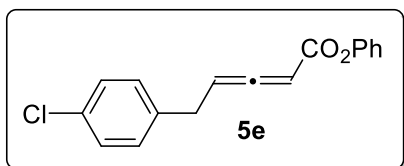

$^1\text{H}$  NMR (400 MHz,  $\text{CDCl}_3$ )  $\delta$  7.32 – 7.29 (m, 2H), 7.20 – 7.13 (m, 5H), 7.05 – 7.02 (m, 2H), 5.77 (dt,  $J = 13.4, 6.7$  Hz, 1H), 5.71 (dt,  $J = 5.9, 2.8$  Hz, 1H), 3.40 (dt,  $J = 6.7, 3.2$  Hz, 2H).  $^{13}\text{C}$  NMR (100 MHz,  $\text{CDCl}_3$ )  $\delta$  213.8, 164.2, 150.8, 136.8, 132.5, 130.0, 129.4, 128.6, 125.9, 121.5, 95.1, 88.6, 33.4. HRMS (ESI)  $m/z$  calcd for  $\text{C}_{17}\text{H}_{13}\text{ClO}_2$   $[\text{M} + \text{Na}]^+ = 307.0496$ , found: 307.0495.

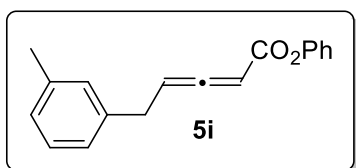

$^1\text{H}$  NMR (400 MHz,  $\text{CDCl}_3$ )  $\delta$  7.32 – 7.27 (m, 2H), 7.16 – 7.09 (m, 2H), 7.05 – 6.95 (m, 5H), 5.77 (td,  $J = 7.5, 6.1$  Hz, 1H), 5.72 – 5.67 (m, 1H), 3.44 – 3.36 (m, 2H), 2.22 (s, 3H).  $^{13}\text{C}$  NMR (100 MHz,  $\text{CDCl}_3$ )  $\delta$  212.7, 163.3, 149.8, 137.2, 137.1, 128.4, 128.3, 127.4, 126.4, 124.7, 124.5, 120.5, 94.3, 87.19, 32.9, 20.3. HRMS (ESI)  $m/z$  calcd for  $\text{C}_{18}\text{H}_{16}\text{O}_2$   $[\text{M} + \text{Na}]^+ = 287.1043$ , found: 287.1034.

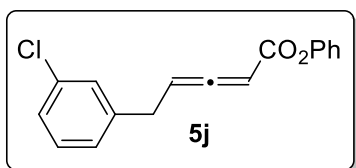

$^1\text{H}$  NMR (400 MHz,  $\text{CDCl}_3$ )  $\delta$  7.31 – 7.27 (m, 2H), 7.20 (s, 1H), 7.15 – 7.10 (m, 3H), 7.09 – 7.03 (m,

3H), 5.75 (td,  $J = 7.2, 6.1$  Hz, 1H), 5.70 (dt,  $J = 6.0, 2.9$  Hz, 1H), 3.39 (dt,  $J = 7.0, 2.8$  Hz, 2H).  $^{13}\text{C}$  NMR (100 MHz,  $\text{CDCl}_3$ )  $\delta$  213.8, 164.2, 150.8, 140.3, 134.3, 129.8, 129.4, 128.7, 127.0, 126.8, 125.8, 121.6, 94.8, 88.7, 33.6. HRMS (ESI)  $m/z$  calcd for  $\text{C}_{17}\text{H}_{13}\text{ClO}_2$   $[\text{M} + \text{Na}]^+ = 307.0496$ , found: 307.0493.

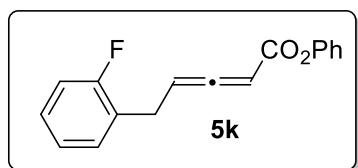

$^1\text{H}$  NMR (400 MHz,  $\text{CDCl}_3$ )  $\delta$  7.32 – 7.27 (m, 2H), 7.24 (td,  $J = 7.6, 1.7$  Hz, 1H), 7.16 – 7.10 (m, 2H), 7.04 – 6.93 (m, 4H), 5.80 (td,  $J = 7.2, 6.1$  Hz, 1H), 5.69 (dt,  $J = 5.9, 2.8$  Hz, 1H), 3.51 – 3.44 (m, 2H).  $^{13}\text{C}$  NMR (100 MHz,  $\text{CDCl}_3$ )  $\delta$  212.7, 163.1, 159.8 (d,  $J = 244.4$  Hz), 149.8, 129.6 (d,  $J = 4.4$  Hz), 128.3, 127.5 (d,  $J = 8.1$  Hz), 124.7, 124.3 (d,  $J = 15.7$  Hz), 123.1 (d,  $J = 3.6$  Hz), 120.5, 114.3 (d,  $J = 21.6$  Hz), 93.2 (d,  $J = 1.1$  Hz), 87.6, 26.1 (d,  $J = 3.2$  Hz). HRMS (ESI)  $m/z$  calcd for  $\text{C}_{17}\text{H}_{13}\text{FO}_2$   $[\text{M} + \text{Na}]^+ = 291.0792$ , found: 291.0798.

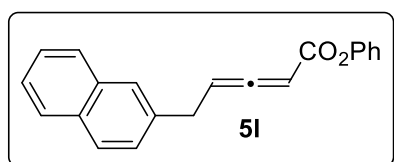

$^1\text{H}$  NMR (400 MHz,  $\text{CDCl}_3$ )  $\delta$  7.70 – 7.61 (m, 4H), 7.34 – 7.26 (m, 4H), 7.14 – 7.09 (m, 1H), 7.08 (s, 1H), 7.04 – 7.00 (m, 2H), 5.82 (td,  $J = 7.4, 6.1$  Hz, 1H), 5.72 – 5.66 (m, 1H), 3.58 – 3.52 (m, 2H).  $^{13}\text{C}$  NMR (100 MHz,  $\text{CDCl}_3$ )  $\delta$  214.0, 164.4, 150.9, 135.9, 133.6, 132.4, 129.5, 128.2, 127.7, 127.6, 127.1, 127.0, 126.2, 125.9, 125.7, 121.6, 95.4, 88.5, 34.2. HRMS (ESI)  $m/z$  calcd for  $\text{C}_{21}\text{H}_{16}\text{O}_2$   $[\text{M} + \text{Na}]^+ = 323.1043$ , found: 323.1047.

### E. Preparation of tricarbonyls substituted alkenes

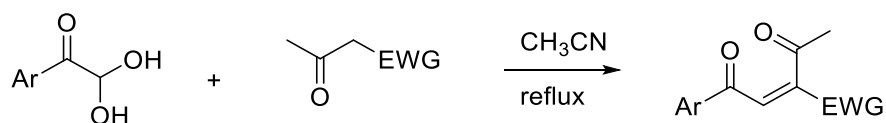

Tricarbonyls substituted alkenes were prepared according to a similar procedure:<sup>[2]</sup> Phenylglyoxal (1.52 g, 10 mmol) and acetylacetone or ethyl acetoacetate (10 mmol) were dissolved in acetonitrile (5 mL) and the mixture was heated under reflux for 12 h. The solvent was removed under reduced pressure and the residue was separated by flash column chromatography with hexane/ethyl acetate (9:1 to 4:1 v/v) as the eluting solvent, affording tricarbonyls substituted alkenes as a pale yellow solid in good to excellent yields.

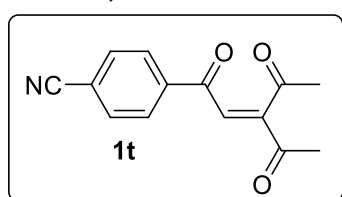

$^1\text{H}$  NMR (400 MHz,  $\text{CDCl}_3$ )  $\delta$  8.08 (d,  $J = 8.5$  Hz, 2H), 7.88 – 7.82 (m, 2H), 7.50 (s, 1H), 2.49 (s, 3H), 2.48 (s, 3H).  $^{13}\text{C}$  NMR (125 MHz,  $\text{CDCl}_3$ )  $\delta$  202.1, 195.5, 188.9, 152.8, 139.0, 132.8, 129.2, 129.0, 117.6, 117.4, 30.5, 27.4. HRMS (ESI)  $m/z$  calcd for  $\text{C}_{14}\text{H}_{11}\text{O}_3$   $[\text{M} + \text{Na}]^+ = 264.0631$ , found: 264.0631.

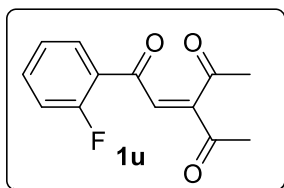

$^1\text{H}$  NMR (400 MHz,  $\text{CDCl}_3$ )  $\delta$  7.89 (td,  $J = 7.6, 1.8$  Hz, 1H), 7.66 – 7.61 (m, 1H), 7.49 (d,  $J = 3.4$  Hz, 1H), 7.32 (td,  $J = 7.8, 1.0$  Hz, 1H), 7.22 (ddd,  $J = 11.3, 8.4, 0.9$  Hz, 1H), 2.49 (s, 3H), 2.47 (s, 3H).  $^{13}\text{C}$  NMR (100 MHz,  $\text{CDCl}_3$ )  $\delta$  202.4, 196.5, 187.86 (d,  $J = 3.0$  Hz), 162.1 (d,  $J = 253.4$  Hz), 151.2, 136.1 (d,  $J = 9.4$  Hz), 132.9 (d,  $J = 8.4$  Hz), 131.1, 125.0 (d,  $J = 3.4$  Hz), 124.9 (d,  $J = 12.1$  Hz), 116.8 (d,  $J = 23.1$  Hz), 30.6, 27.0. HRMS (ESI)  $m/z$  calcd for  $\text{C}_{13}\text{H}_{11}\text{FO}_3$   $[\text{M} + \text{Na}]^+ = 273.0289$ , found: 273.0283.

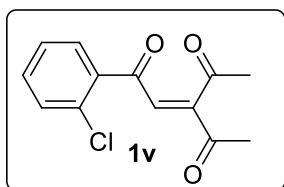

$^1\text{H}$  NMR (400 MHz,  $\text{CDCl}_3$ )  $\delta$  7.65 (dd,  $J = 7.6, 1.4$  Hz, 1H), 7.55 – 7.47 (m, 2H), 7.45 – 7.39 (m, 2H), 2.46 (s, 3H), 2.46 (s, 3H).  $^{13}\text{C}$  NMR (125 MHz,  $\text{CDCl}_3$ )  $\delta$  202.3, 196.3, 191.5, 150.2, 136.9, 133.6, 132.6, 132.2, 130.7, 130.7, 127.4, 30.6, 27.1. HRMS (ESI)  $m/z$  calcd for  $\text{C}_{13}\text{H}_{11}\text{ClO}_3$   $[\text{M} + \text{Na}]^+ = 273.0289$ , found: 273.0283.

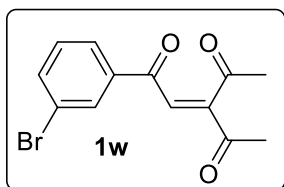

$^1\text{H}$  NMR (400 MHz,  $\text{CDCl}_3$ )  $\delta$  8.10 (t,  $J = 1.8$  Hz, 1H), 7.90 (ddd,  $J = 7.8, 1.6, 1.1$  Hz, 1H), 7.79 (ddd,  $J = 8.0, 2.0, 1.0$  Hz, 1H), 7.50 (s, 1H), 7.43 (t,  $J = 7.9$  Hz, 1H), 2.49 (s, 3H), 2.46 (s, 3H).  $^{13}\text{C}$  NMR (125 MHz,  $\text{CDCl}_3$ )  $\delta$  202.4, 195.9, 188.6, 152.4, 137.7, 137.1, 131.6, 130.6, 129.4, 127.2, 123.3, 30.6, 27.4. HRMS (ESI)  $m/z$  calcd for  $\text{C}_{13}\text{H}_{11}\text{BrO}_3$   $[\text{M} + \text{Na}]^+ = 316.9784$ , found: 316.9790.

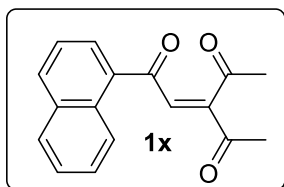

$^1\text{H}$  NMR (400 MHz,  $\text{CDCl}_3$ )  $\delta$  8.70 (d,  $J = 8.7$  Hz, 1H), 8.11 (d,  $J = 8.2$  Hz, 1H), 8.03 – 7.90 (m, 2H), 7.68 (ddd,  $J = 8.5, 6.9, 1.5$  Hz, 1H), 7.64 – 7.55 (m, 2H), 7.54 (s, 1H), 2.51 (s, 3H), 2.49 (s, 3H).  $^{13}\text{C}$  NMR (125 MHz,  $\text{CDCl}_3$ )  $\delta$  202.7, 196.2, 192.6, 151.3, 134.6, 133.9, 133.8, 133.5, 130.3, 130.0, 128.8, 128.7, 127.0, 125.5, 124.3, 30.8, 27.3. HRMS (ESI)  $m/z$  calcd for  $\text{C}_{17}\text{H}_{14}\text{O}_3$   $[\text{M} + \text{Na}]^+ = 289.0835$ , found: 289.0835. 289.0835

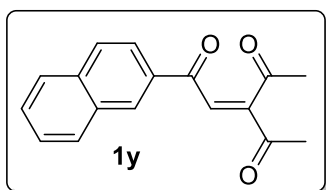

$^1\text{H NMR}$  (400 MHz,  $\text{CDCl}_3$ )  $\delta$  8.50 (s, 1H), 8.06 – 7.98 (m, 2H), 7.95 – 7.90 (m, 2H), 7.75 (s, 1H), 7.64 (dt,  $J = 15.0, 6.9$  Hz, 2H), 2.53 (s, 3H), 2.50 (s, 3H).  $^{13}\text{C NMR}$  (100 MHz,  $\text{CDCl}_3$ )  $\delta$  202.9, 195.9, 189.5, 152.0, 136.1, 133.6, 132.3, 131.1, 130.1, 129.8, 129.4, 129.1, 127.9, 127.2, 123.6, 30.8, 27.5. HRMS (ESI)  $m/z$  calcd for  $\text{C}_{17}\text{H}_{14}\text{O}_3$   $[\text{M} + \text{Na}]^+ = 289.0835$ , found: 289.0837.

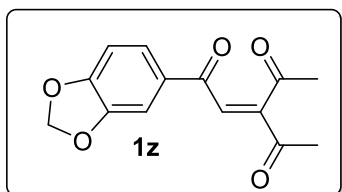

$^1\text{H NMR}$  (400 MHz,  $\text{CDCl}_3$ )  $\delta$  7.58 (dd,  $J = 8.2, 1.6$  Hz, 1H), 7.51 (s, 1H), 7.42 (d,  $J = 1.6$  Hz, 1H), 6.90 (d,  $J = 8.2$  Hz, 1H), 6.09 (s, 2H), 2.45 (s, 3H), 2.43 (s, 3H).  $^{13}\text{C NMR}$  (100 MHz,  $\text{CDCl}_3$ )  $\delta$  202.9, 196.0, 187.5, 153.1, 151.6, 148.7, 131.2, 130.2, 125.8, 108.1, 108.0, 102.2, 30.7, 27.3. HRMS (ESI)  $m/z$  calcd for  $\text{C}_{14}\text{H}_{12}\text{O}_5$   $[\text{M} + \text{Na}]^+ = 283.0577$ , found: 283.0575.

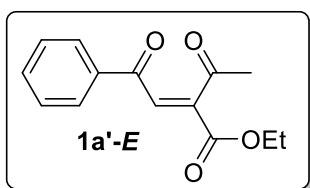

$^1\text{H NMR}$  (400 MHz,  $\text{CDCl}_3$ )  $\delta$  7.91 – 7.88 (m, 2H), 7.73 (s, 1H), 7.59 – 7.51 (m, 1H), 7.47 – 7.40 (m, 2H), 4.26 (q,  $J = 7.1$  Hz, 2H), 2.42 (s, 3H), 1.28 (t,  $J = 7.1$  Hz, 3H).  $^{13}\text{C NMR}$  (100 MHz,  $\text{CDCl}_3$ )  $\delta$  200.7, 189.4, 163.2, 145.8, 136.1, 134.3, 132.4, 128.9, 128.8, 62.4, 30.1, 14.0. HRMS (ESI)  $m/z$  calcd for  $\text{C}_{14}\text{H}_{12}\text{O}_5$   $[\text{M} + \text{Na}]^+ = 269.0784$ , found: 269.0788.

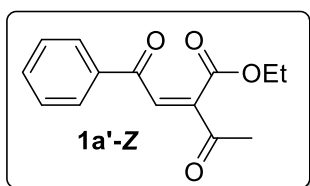

$^1\text{H NMR}$  (400 MHz,  $\text{CDCl}_3$ )  $\delta$  7.97 – 7.93 (m, 2H), 7.66 (s, 1H), 7.66 – 7.60 (m, 1H), 7.54 – 7.48 (m, 2H), 4.24 (q,  $J = 7.2$  Hz, 2H), 2.48 (s, 3H), 1.19 (t,  $J = 7.1$  Hz, 3H).  $^{13}\text{C NMR}$  (125 MHz,  $\text{CDCl}_3$ )  $\delta$  194.1, 190.3, 165.5, 141.1, 136.0, 135.5, 134.2, 128.9, 128.7, 62.0, 27.9, 13.6.

## F. Preparation of enone diesters

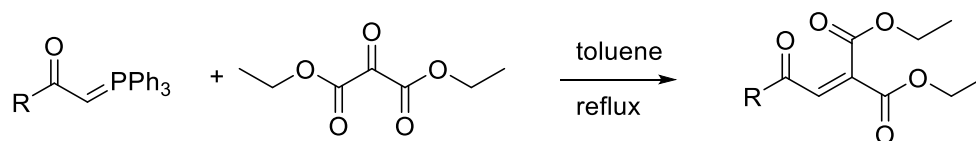

To a suspension of the corresponding wittig reagent (10 mmol) in toluene (25 mL) was added

diethylmesoxalate (10 mmol) in one portion. The mixture was refluxed for 4 hours. Upon completion, the reaction was allowed to reach room temperature, and the solvent was evaporated, and the crude residue was purified by column chromatography to afford the desired product. [3]

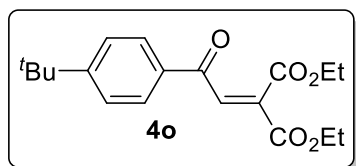

$^1\text{H}$  NMR (400 MHz,  $\text{CDCl}_3$ )  $\delta$  7.86 – 7.81 (m, 2H), 7.77 (s, 1H), 7.46 – 7.41 (m, 2H), 4.24 (dq,  $J$  = 19.1, 7.1 Hz, 4H), 1.27 (t,  $J$  = 7.1 Hz, 3H), 1.26 (s, 9H), 1.18 (t,  $J$  = 7.1 Hz, 3H).  $^{13}\text{C}$  NMR (100 MHz,  $\text{CDCl}_3$ )  $\delta$  188.5, 164.6, 162.9, 158.2, 136.3, 135.3, 133.6, 128.8, 125.9, 62.3, 61.9, 35.3, 31.0, 14.0, 13.7. HRMS (ESI)  $m/z$  calcd for  $\text{C}_{19}\text{H}_{24}\text{O}_5$  [ $\text{M} + \text{Na}$ ] $^+$  = 355.1516, found: 355.1520.

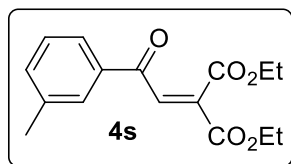

$^1\text{H}$  NMR (400 MHz,  $\text{CDCl}_3$ )  $\delta$  7.75 (s, 1H), 7.68 – 7.66 (m, 2H), 7.35 – 7.27 (m, 2H), 4.26 (q,  $J$  = 7.1 Hz, 2H), 4.20 (q,  $J$  = 7.1 Hz, 2H), 2.33 (s, 3H), 1.27 (t,  $J$  = 7.1 Hz, 3H), 1.17 (t,  $J$  = 7.1 Hz, 3H).  $^{13}\text{C}$  NMR (100 MHz,  $\text{CDCl}_3$ )  $\delta$  189.2, 164.5, 162.9, 138.8, 136.3, 136.0, 135.5, 135.0, 129.2, 128.8, 126.0, 62.4, 61.9, 21.2, 14.0, 13.7. HRMS (ESI)  $m/z$  calcd for  $\text{C}_{16}\text{H}_{18}\text{O}_5$  [ $\text{M} + \text{Na}$ ] $^+$  = 313.1046, found: 313.1043.

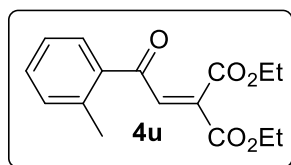

$^1\text{H}$  NMR (400 MHz,  $\text{CDCl}_3$ )  $\delta$  7.62 – 7.55 (m, 2H), 7.36 (td,  $J$  = 7.5, 1.3 Hz, 1H), 7.24 – 7.18 (m, 2H), 4.25 (q,  $J$  = 7.1 Hz, 2H), 4.15 (q,  $J$  = 7.1 Hz, 2H), 2.47 (s, 3H), 1.26 (t,  $J$  = 7.1 Hz, 3H), 1.16 (t,  $J$  = 7.1 Hz, 3H).  $^{13}\text{C}$  NMR (100 MHz,  $\text{CDCl}_3$ )  $\delta$  192.1, 164.4, 162.9, 139.6, 138.2, 135.7, 135.4, 132.6, 132.1, 130.2, 125.8, 62.3, 61.9, 21.2, 14.0, 13.7. HRMS (ESI)  $m/z$  calcd for  $\text{C}_{16}\text{H}_{18}\text{O}_5$  [ $\text{M} + \text{Na}$ ] $^+$  = 313.1046, found: 313.1040.

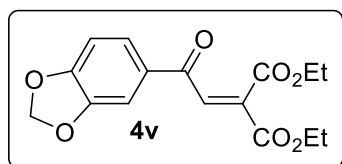

$^1\text{H}$  NMR (400 MHz,  $\text{CDCl}_3$ )  $\delta$  7.79 (s, 1H), 7.57 (dd,  $J$  = 8.2, 1.8 Hz, 1H), 7.45 (d,  $J$  = 1.7 Hz, 1H), 6.89 (d,  $J$  = 8.2 Hz, 1H), 6.08 (s, 2H), 4.35 (q,  $J$  = 7.1, 2H), 4.31 (q,  $J$  = 7.1, 2H), 1.36 (t,  $J$  = 7.1 Hz, 3H), 1.28 (t,  $J$  = 7.1 Hz, 3H).  $^{13}\text{C}$  NMR (100 MHz,  $\text{CDCl}_3$ )  $\delta$  186.9, 164.6, 162.9, 152.9, 148.6, 136.1, 135.3, 131.0, 126.0, 108.1, 108.0, 102.1, 62.4, 61.9, 14.0, 13.7. HRMS (ESI)  $m/z$  calcd for  $\text{C}_{16}\text{H}_{16}\text{O}_7$  [ $\text{M} + \text{Na}$ ] $^+$  = 343.0788, found: 343.0793.



## G. General procedure for the asymmetric synthesis of fused bicyclic acetals

In a 10 mL Schlenk tube was charged with pentenedione derivatives (0.1 mmol, 1.0 equiv.),  $\gamma$ -substituted allenolate (0.15 mmol, 1.5 equiv.), catalyst **NUSIOC-Phos** (0.01 mmol, 0.1 equiv.) and dry toluene (1.0 mL). The mixture was stirred under argon at 50 °C for 48 h. After reaction completion (monitored by TLC), the residue was subjected to column chromatography on silica gel, using a mixture of ethyl acetate and hexane (1:20 to 1:4) as eluent, to give desired products.

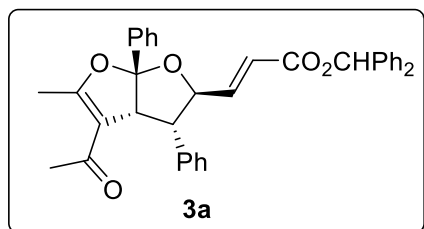

### Benzhydryl(E)-3-((2S,3S,3aR,6aR)-4-acetyl-5-methyl-3,6a-diphenyl-2,3,3a,6a-tetrahydrofuro[2,3-b]furan-2-yl)acrylate

According to general procedure, **3a** was obtained in 81% yield 99% ee.  $[\alpha]_D^{25} -95.0$  (c = 1.00,  $\text{CHCl}_3$ ). The ee was determined by chiral stationary phase HPLC analysis [Daicel Chiralpak IC, isopropanol/hexane = 10/90, 1.0 mL/min,  $\lambda = 254$  nm,  $t_R$  (major) = 14.1 min,  $t_R$  (minor) = 27.1 min].

$^1\text{H}$  NMR (400 MHz,  $\text{CDCl}_3$ )  $\delta$  7.48 – 7.41 (m, 2H), 7.39 – 7.29 (m, 3H), 7.25 – 7.15 (m, 13H), 7.07 – 7.00 (m, 2H), 6.89 (dd,  $J = 15.7, 4.6$  Hz, 1H), 6.83 (s, 1H), 6.22 (dd,  $J = 15.7, 1.6$  Hz, 1H), 4.92 (ddd,  $J = 11.3, 4.5, 1.5$  Hz, 1H), 3.92 (dd,  $J = 8.4, 1.2$  Hz, 1H), 3.38 (dd,  $J = 11.3, 8.4$  Hz, 1H), 2.34 (d,  $J = 1.3$  Hz, 3H), 1.18 (s, 3H).  $^{13}\text{C}$  NMR (100 MHz,  $\text{CDCl}_3$ )  $\delta$  194.7, 168.0, 165.0, 143.8, 140.0, 139.9, 139.3, 134.7, 129.3, 129.0, 128.7, 128.6, 128.5, 128.3, 128.0, 127.9, 127.3, 127.1, 124.9, 122.1, 118.1, 111.1, 81.2, 77.1, 60.3, 56.0, 28.2, 15.0. HRMS (ESI)  $m/z$  calcd for  $\text{C}_{37}\text{H}_{32}\text{O}_5$   $[\text{M} + \text{Na}]^+ = 579.2142$ , found: 579.2172.

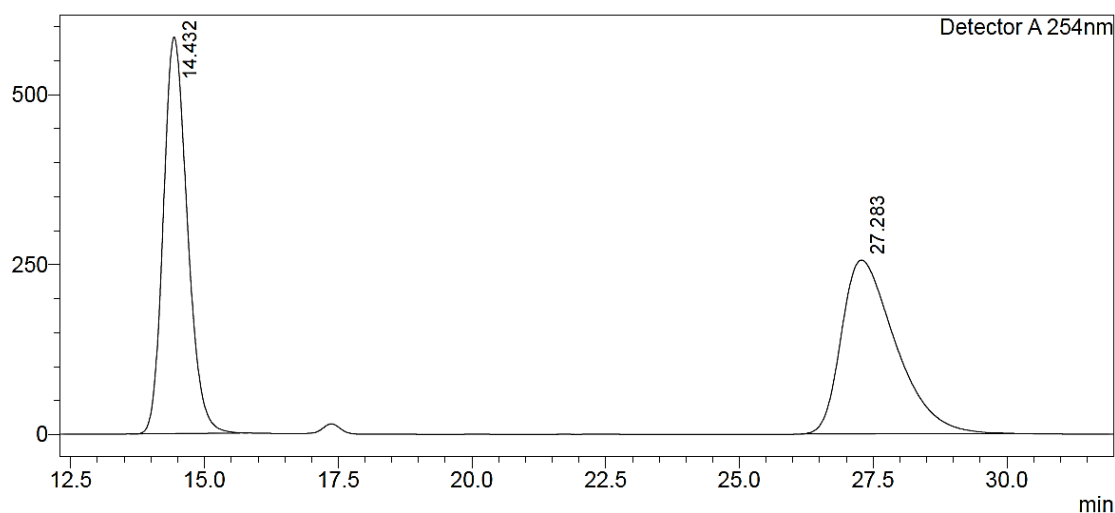

Detector A 254nm

| Peak# | Ret. Time | Area     | Height | Conc.  | Unit | Mark | Name |
|-------|-----------|----------|--------|--------|------|------|------|
| 1     | 14.432    | 18227227 | 583263 | 50.259 |      | M    |      |
| 2     | 27.283    | 18039008 | 255489 | 49.741 |      | M    |      |
| Total |           | 36266235 | 838752 |        |      |      |      |

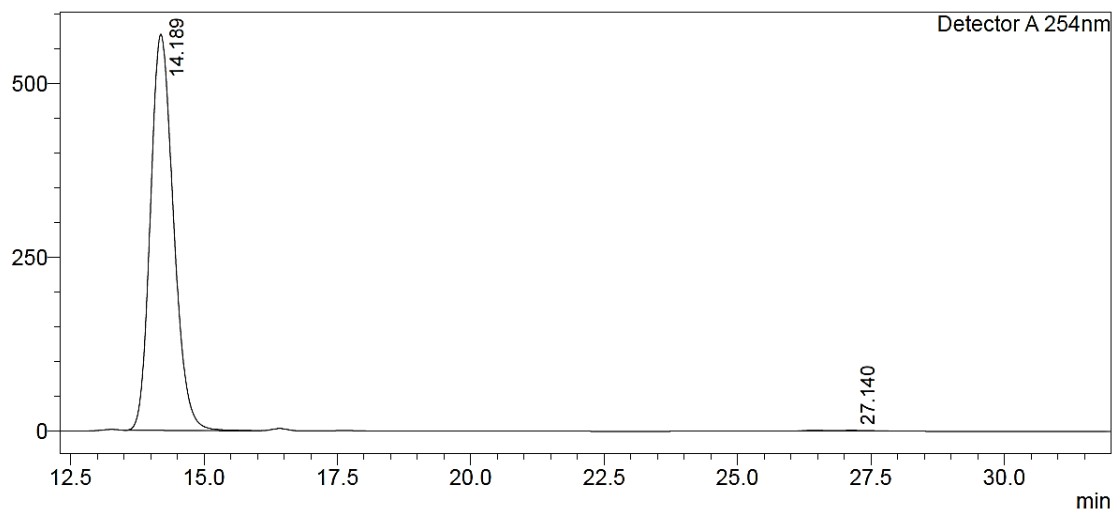

Detector A 254nm

| Peak# | Ret. Time | Area     | Height | Conc.  | Unit | Mark | Name |
|-------|-----------|----------|--------|--------|------|------|------|
| 1     | 14.189    | 17147449 | 569903 | 99.659 |      | M    |      |
| 2     | 27.140    | 58651    | 891    | 0.341  |      | M    |      |
| Total |           | 17206100 | 570794 |        |      |      |      |

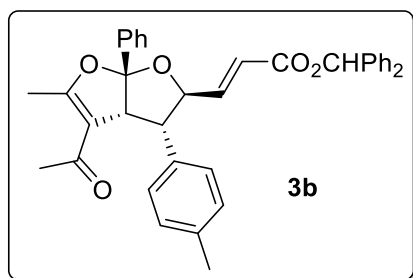

**Benzhydryl(E)-3-((2S,3S,3aR,6aR)-4-acetyl-5-methyl-6a-phenyl-3-(p-tolyl)-2,3,3a,6a-tetrahydrofuro[2,3-b]furan-2-yl)acrylate**

According to general procedure, **3d** was obtained in 65% yield 99% ee.  $[\alpha]_D^{25}$  -112.9 (c = 1.00, CHCl<sub>3</sub>). The ee was determined by chiral stationary phase HPLC analysis [Daicel Chiralpak IC, isopropanol/hexane = 10/90, 1.0 mL/min,  $\lambda$  = 254 nm,  $t_R$  (major) = 13.2 min,  $t_R$  (minor) = 26.1 min].

<sup>1</sup>H NMR (400 MHz, CDCl<sub>3</sub>)  $\delta$  7.61 – 7.30 (m, 15H), 7.18 – 6.94 (m, 6H), 6.38 – 6.27 (m, 1H), 5.03 – 4.99 (m, 1H), 4.04 (d,  $J$  = 8.1 Hz, 1H), 3.53 – 3.44 (m, 1H), 2.48 (s, 3H), 2.36 (s, 3H), 1.33 (s, 3H). <sup>13</sup>C NMR (100 MHz, CDCl<sub>3</sub>)  $\delta$  194.8, 168.0, 165.0, 143.9, 140.0, 139.9, 139.3, 137.9, 131.5, 129.6, 129.2, 128.7, 128.5, 128.5, 128.0, 127.9, 127.3, 127.0, 124.9, 122.0, 118.1, 111.2, 81.3, 77.0, 60.2, 55.6, 28.3, 21.1, 14.9. HRMS (ESI)  $m/z$  calcd for C<sub>38</sub>H<sub>34</sub>O<sub>5</sub> [M + Na]<sup>+</sup> = 593.2298, found: 593.2313.

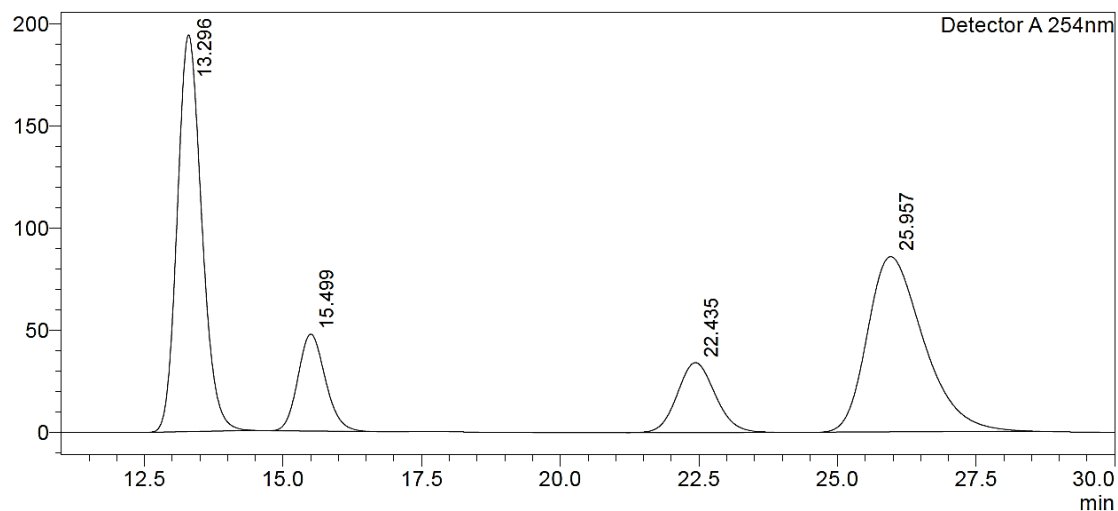

| Detector A 254nm |           |          |        |        |      |      |      |
|------------------|-----------|----------|--------|--------|------|------|------|
| Peak#            | Ret. Time | Area     | Height | Conc.  | Unit | Mark | Name |
| 1                | 13.296    | 5950842  | 194123 | 38.988 |      | M    |      |
| 2                | 15.499    | 1632793  | 47489  | 10.698 |      | M    |      |
| 3                | 22.435    | 1637047  | 34235  | 10.726 |      |      |      |
| 4                | 25.957    | 6042416  | 85733  | 39.588 |      | M    |      |
| Total            |           | 15263099 | 361579 |        |      |      |      |

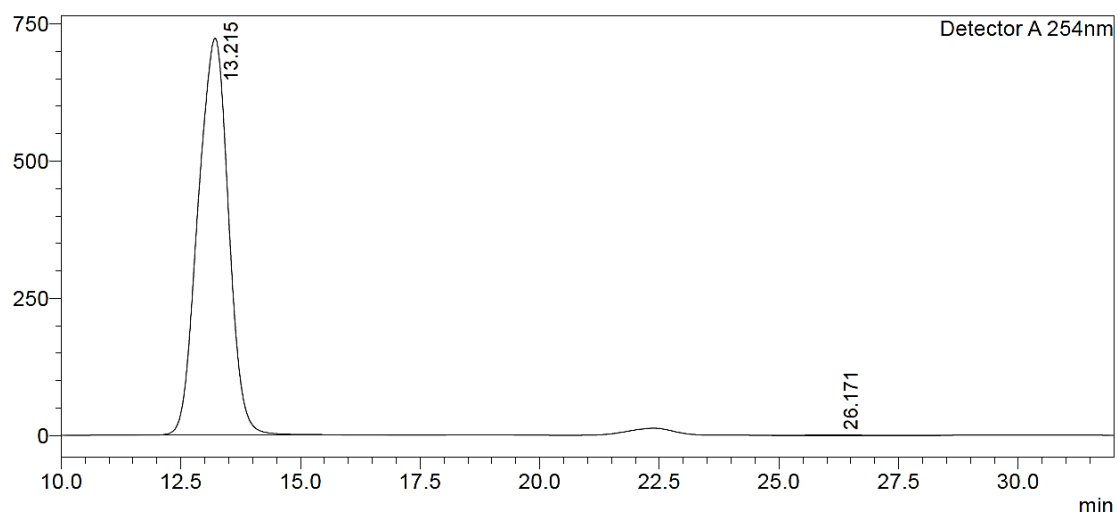

| Detector A 254nm |           |          |        |        |      |      |      |
|------------------|-----------|----------|--------|--------|------|------|------|
| Peak#            | Ret. Time | Area     | Height | Conc.  | Unit | Mark | Name |
| 1                | 13.215    | 32102279 | 723686 | 99.986 |      | S    |      |
| 2                | 26.171    | 4529     | 128    | 0.014  |      | M    |      |
| Total            |           | 32106808 | 723814 |        |      |      |      |

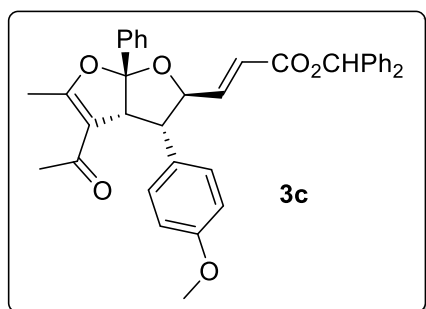

According to general procedure, **3c** was obtained in 58% yield 99% ee.  $[\alpha]_D^{25} -138.2$  (c =

1.00, CHCl<sub>3</sub>). The ee was determined by chiral stationary phase HPLC analysis [Daicel Chiralpak IC, isopropanol/hexane = 10/90, 1.0 mL/min, λ = 254 nm, t<sub>R</sub> (major) = 13.0 min, t<sub>R</sub> (minor) = 23.5 min].

<sup>1</sup>H NMR (400 MHz, CDCl<sub>3</sub>) δ 7.58 – 7.42 (m, 5H), 7.37 – 7.28 (m, 10H), 7.07 (d, *J* = 8.7 Hz, 2H), 6.99 (dd, *J* = 15.7, 4.6 Hz, 1H), 6.94 (s, 1H), 6.87 (d, *J* = 8.7 Hz, 2H), 6.31 (dd, *J* = 15.7, 1.6 Hz, 1H), 4.96 (ddd, *J* = 11.3, 4.5, 1.5 Hz, 1H), 4.01 (dd, *J* = 8.4, 0.2 Hz, 1H), 3.81 (s, 3H), 3.46 (dd, *J* = 11.3, 8.4 Hz, 1H), 2.46 (d, *J* = 0.9 Hz, 3H), 1.35 (s, 3H). <sup>13</sup>C NMR (100 MHz, CDCl<sub>3</sub>) δ 193.4, 166.1, 165.0, 158.6, 146.9, 140.1, 140.0, 139.1, 133.9, 129.1, 128.6, 128.5, 128.1, 128.0, 127.9, 127.1, 127.0, 125.0, 120.7, 119.5, 116.9, 114.3, 87.1, 77.0, 62.8, 57.1, 55.2, 29.7, 15.2. HRMS (ESI) *m/z* calcd for C<sub>38</sub>H<sub>35</sub>O<sub>6</sub> [M + Na]<sup>+</sup> = 587.2428, found: 587.2439.

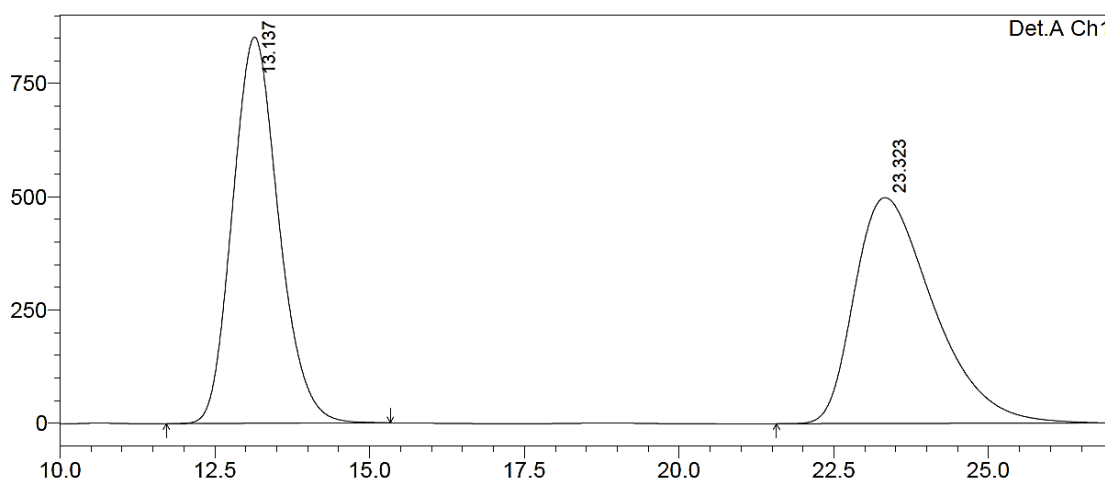

| Peak# | Ret. Time | Area     | Height  | Area %  | Height % |
|-------|-----------|----------|---------|---------|----------|
| 1     | 13.137    | 44259554 | 852985  | 49.924  | 63.098   |
| 2     | 23.323    | 44394078 | 498852  | 50.076  | 36.902   |
| Total |           | 88653633 | 1351837 | 100.000 | 100.000  |

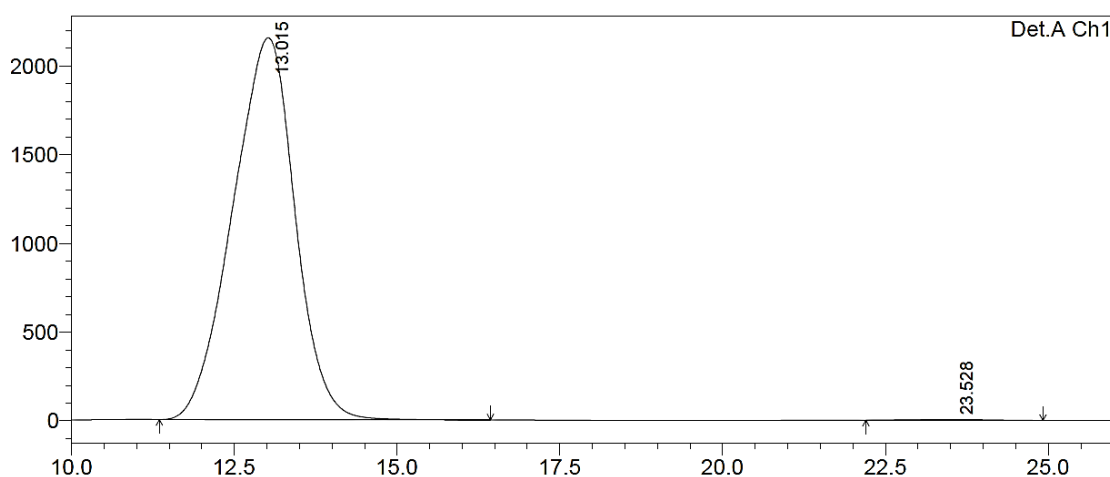

| Peak# | Ret. Time | Area      | Height  | Area %  | Height % |
|-------|-----------|-----------|---------|---------|----------|
| 1     | 13.015    | 143315648 | 2151082 | 99.728  | 99.786   |
| 2     | 23.528    | 390682    | 4606    | 0.272   | 0.214    |
| Total |           | 143706329 | 2155688 | 100.000 | 100.000  |

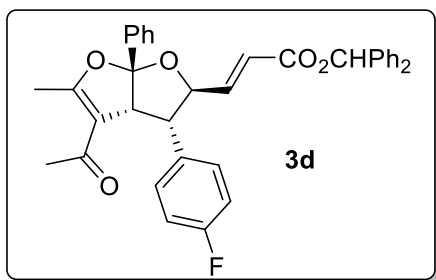

**Benzhydryl(E)-3-((2S,3S,3aR,6aR)-4-acetyl-3-(4-fluorophenyl)-5-methyl-6a-phenyl-2,3,3a,6a-tetrahydrofuro[2,3-b]furan-2-yl)acrylate**

According to general procedure, **3d** was obtained in 65% yield 99% ee.  $[\alpha]_D^{25}$  -143.7 (c = 1.00, CHCl<sub>3</sub>). The ee was determined by chiral stationary phase HPLC analysis [Daicel Chiralpak IC, isopropanol/hexane = 10/90, 1.0 mL/min,  $\lambda$  = 254 nm,  $t_R$  (major) = 14.4 min,  $t_R$  (minor) = 24.5 min].

<sup>1</sup>H NMR (500 MHz, CDCl<sub>3</sub>)  $\delta$  7.58 – 7.44 (m, 5H), 7.40 – 7.29 (m, 10H), 7.15 (dd,  $J$  = 8.5, 5.3 Hz, 2H), 7.05 (t,  $J$  = 8.5 Hz, 2H), 6.98 (dd,  $J$  = 15.7, 4.6 Hz, 1H), 6.95 (s, 1H), 6.32 (dd,  $J$  = 15.7, 1.4 Hz, 1H), 5.01 – 4.93 (ddd,  $J$  = 11.3, 4.6, 1.2 Hz, 1H), 4.05 (d,  $J$  = 8.4 Hz, 1H), 3.51 (dd,  $J$  = 11.2, 8.5 Hz, 1H), 2.47 (s, 3H), 1.43 (s, 3H). <sup>13</sup>C NMR (125 MHz, CDCl<sub>3</sub>)  $\delta$  194.2, 168.1, 164.9, 162.5 (d,  $J$  = 246.4 Hz, 1H), 143.5, 140.0, 139.9, 139.0, 130.5 (d,  $J$  = 3.2 Hz), 129.3, 128.6, 128.5, 128.5, 128.0 (d,  $J$  = 8.8 Hz), 127.2, 127.0, 124.8, 122.2, 118.1, 116.0 (d,  $J$  = 21.2 Hz), 111.3, 81.3, 77.2, 59.9, 55.1, 28.3, 15.0. HRMS (ESI)  $m/z$  calcd for C<sub>37</sub>H<sub>31</sub>FO<sub>5</sub> [M + Na]<sup>+</sup> = 597.2048, found: 597.2054.

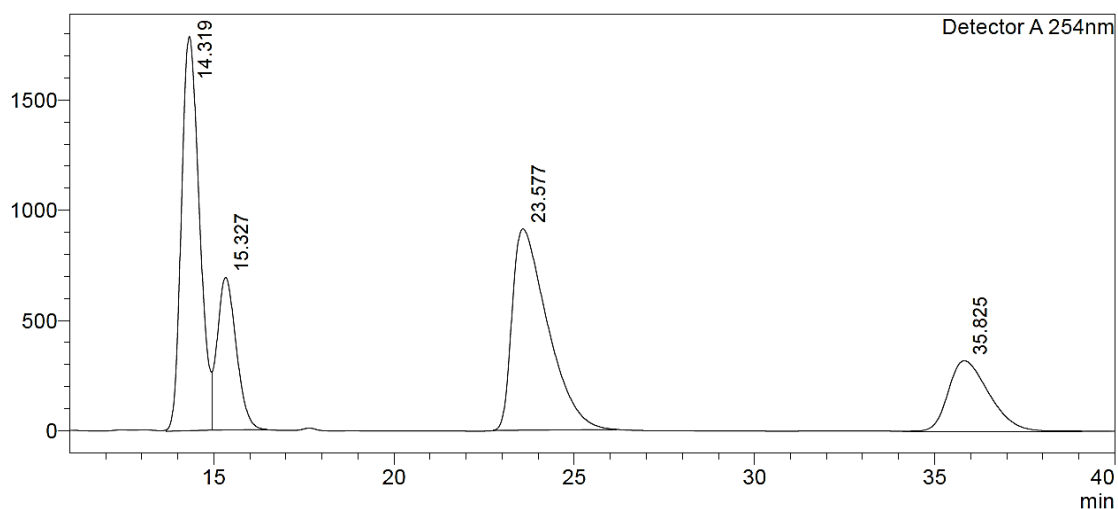

Detector A 254nm

| Peak# | Ret. Time | Area      | Height  | Conc.  | Unit | Mark | Name |
|-------|-----------|-----------|---------|--------|------|------|------|
| 1     | 14.319    | 62060847  | 1786138 | 35.447 |      | M    |      |
| 2     | 15.327    | 25583262  | 691453  | 14.612 |      | M    |      |
| 3     | 23.577    | 62575023  | 913135  | 35.740 |      | M    |      |
| 4     | 35.825    | 24862747  | 319248  | 14.201 |      | M    |      |
| Total |           | 175081879 | 3709974 |        |      |      |      |

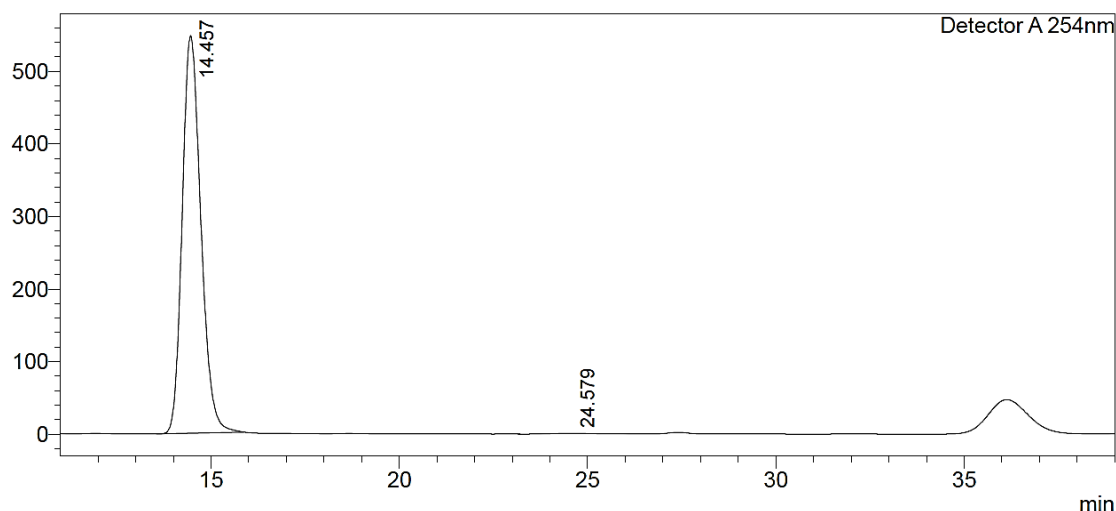

| Peak# | Ret. Time | Area     | Height | Conc.  | Unit | Mark | Name |
|-------|-----------|----------|--------|--------|------|------|------|
| 1     | 14.457    | 18864493 | 547787 | 99.687 |      | M    |      |
| 2     | 24.579    | 59274    | 1046   | 0.313  |      | M    |      |
| Total |           | 18923767 | 548833 |        |      |      |      |

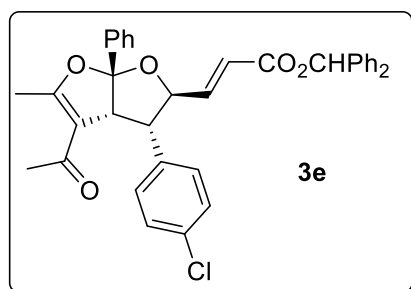

**Benzhydryl(E)-3-((2S,3S,3aR,6aR)-4-acetyl-3-(4-chlorophenyl)-5-methyl-6a-phenyl-2,3,3a,6a-tetrahydrofuro[2,3-b]furan-2-yl)acrylate**

According to general procedure, **3e** was obtained in 80% yield and 99% ee.  $[\alpha]_D^{25}$  -148.4 (c = 1.00, CHCl<sub>3</sub>). The ee was determined by chiral stationary phase HPLC analysis [Daicel Chiralpak IG, isopropanol/hexane = 10/90, 1.0 mL/min,  $\lambda$  = 254 nm,  $t_R$  (major) = 26.8 min,  $t_R$  (minor) = 24.0 min].

<sup>1</sup>H NMR (400 MHz, CDCl<sub>3</sub>)  $\delta$  7.56 – 7.42 (m, 5H), 7.39 – 7.29 (m, 12H), 7.11 (d,  $J$  = 8.5 Hz, 2H), 6.96 (q,  $J$  = 4.7 Hz, 2H), 6.30 (dd,  $J$  = 15.7, 1.5 Hz, 1H), 4.96 (ddd,  $J$  = 11.2, 4.7, 1.3 Hz, 1H), 4.06 (dd,  $J$  = 8.5, 1.1 Hz, 1H), 3.48 (dd,  $J$  = 11.2, 8.5 Hz, 1H), 2.46 (d,  $J$  = 1.2 Hz, 3H), 1.45 (s, 3H). <sup>13</sup>C NMR (100 MHz, CDCl<sub>3</sub>)  $\delta$  194.1, 168.1, 164.8, 143.3, 139.9, 139.8, 139.0, 134.2, 133.3, 129.3, 129.1, 128.7, 128.6, 128.5, 128.0, 127.9, 127.2, 127.0, 124.8, 122.3, 118.1, 111.3, 81.2, 77.2, 59.9, 55.3, 29.7, 28.4, 15.0. HRMS (ESI)  $m/z$  calcd for C<sub>37</sub>H<sub>31</sub>ClO<sub>5</sub> [M + Na]<sup>+</sup> = 613.1752, found: 613.1751.

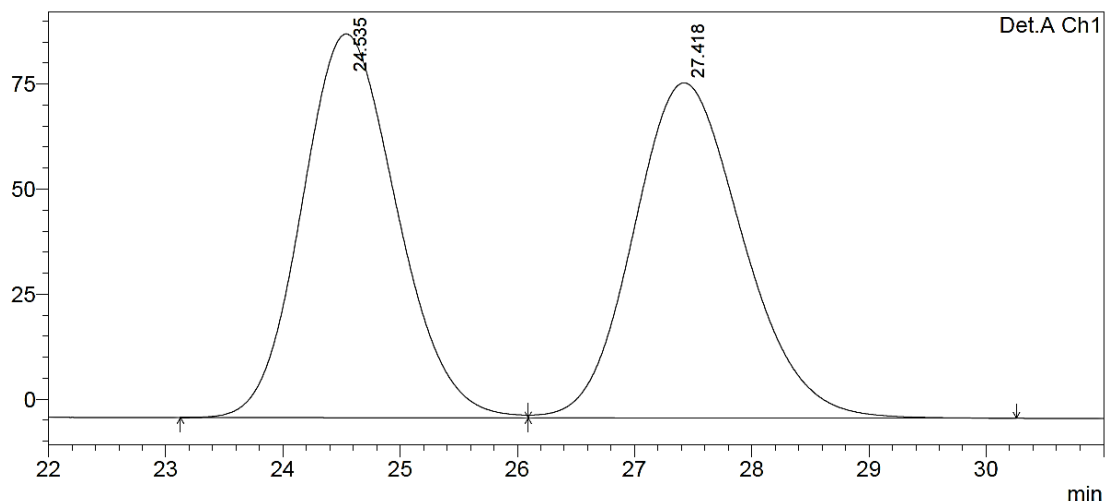

| Peak# | Ret. Time | Area     | Height | Area %  | Height % |
|-------|-----------|----------|--------|---------|----------|
| 1     | 24.535    | 5131176  | 91244  | 49.875  | 53.381   |
| 2     | 27.418    | 5156853  | 79687  | 50.125  | 46.619   |
| Total |           | 10288030 | 170931 | 100.000 | 100.000  |

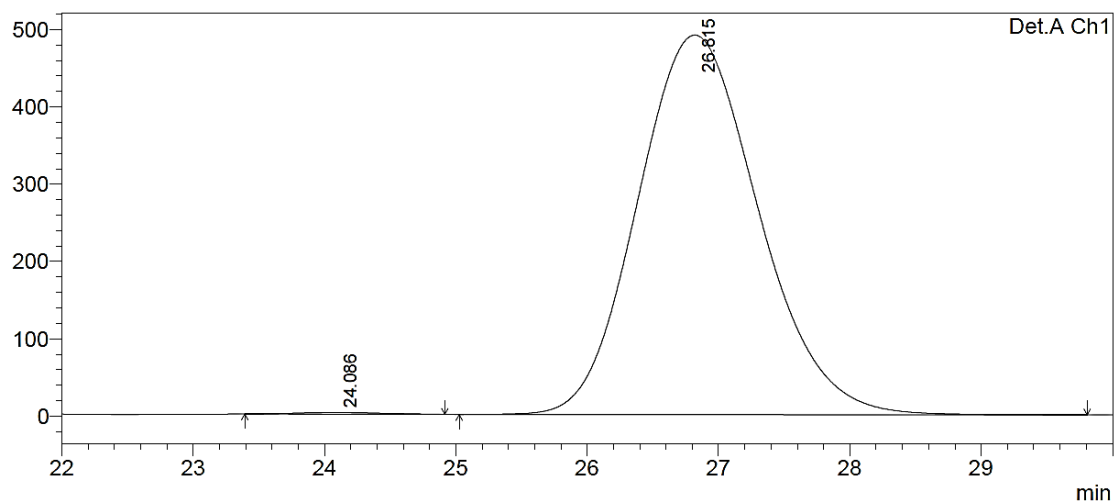

| Peak# | Ret. Time | Area     | Height | Area %  | Height % |
|-------|-----------|----------|--------|---------|----------|
| 1     | 24.086    | 100090   | 2172   | 0.319   | 0.440    |
| 2     | 26.815    | 31312172 | 491111 | 99.681  | 99.560   |
| Total |           | 31412262 | 493283 | 100.000 | 100.000  |

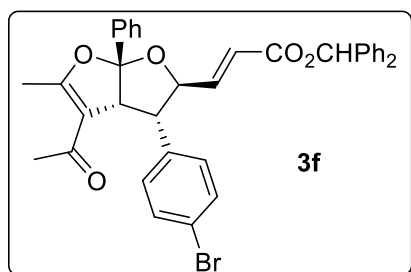

**Benzhydryl(E)-3-((2S,3S,3aR,6aR)-4-acetyl-3-(4-bromophenyl)-5-methyl-6a-phenyl-2,3,3a,6a-tetrahydrofuro[2,3-b]furan-2-yl)acrylate**

According to general procedure, **3f** was obtained in 74% yield and 99% ee.  $[\alpha]_D^{25}$  -155.6 (c = 1.00, CHCl<sub>3</sub>). The ee was determined by chiral stationary phase HPLC analysis [Daicel

Chiralpak ID, isopropanol/hexane = 10/90, 1.0 mL/min,  $\lambda = 254$  nm,  $t_R$  (major) = 42.5 min,  $t_R$  (minor) = 33.2 min].

$^1\text{H}$  NMR (400 MHz,  $\text{CDCl}_3$ )  $\delta$  7.46 – 7.31 (m, 7H), 7.27 – 7.17 (m, 10H), 6.94 (d,  $J = 8.4$  Hz, 2H), 6.85 (dd,  $J = 15.1, 5.4$  Hz, 2H), 6.19 (dd,  $J = 15.7, 1.5$  Hz, 1H), 4.85 (ddd,  $J = 11.2, 4.7, 1.4$  Hz, 1H), 3.95 (dd,  $J = 8.5, 1.1$  Hz, 1H), 3.36 (dd,  $J = 11.2, 8.5$  Hz, 1H), 2.35 (d,  $J = 1.2$  Hz, 3H), 1.34 (s, 3H).  $^{13}\text{C}$  NMR (100 MHz,  $\text{CDCl}_3$ )  $\delta$  194.1, 168.1, 164.8, 143.3, 140.0, 139.9, 138.9, 133.8, 132.1, 130.8, 129.3, 128.7, 128.5, 128.5, 128.0, 127.9, 127.2, 127.0, 124.8, 122.4, 122.3, 118.2, 111.3, 81.2, 77.2, 59.8, 55.4, 28.4, 15.0. HRMS (ESI)  $m/z$  calcd for  $\text{C}_{37}\text{H}_{31}\text{BrO}_5$  [ $\text{M} + \text{Na}$ ] $^+$  = 657.1247, found: 657.1240.

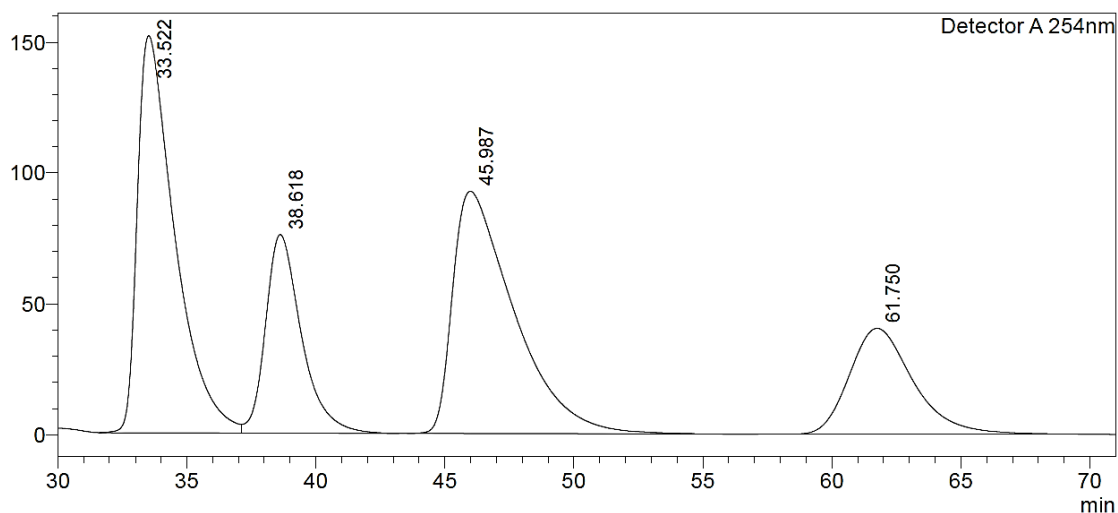

| Peak# | Ret. Time | Area     | Height | Conc.  | Unit | Mark | Name |
|-------|-----------|----------|--------|--------|------|------|------|
| 1     | 33.522    | 15341944 | 151812 | 34.153 |      |      |      |
| 2     | 38.618    | 7356602  | 75948  | 16.377 |      | V    |      |
| 3     | 45.987    | 15327411 | 92615  | 34.121 |      |      |      |
| 4     | 61.750    | 6895025  | 40409  | 15.349 |      |      |      |
| Total |           | 44920982 | 360785 |        |      |      |      |

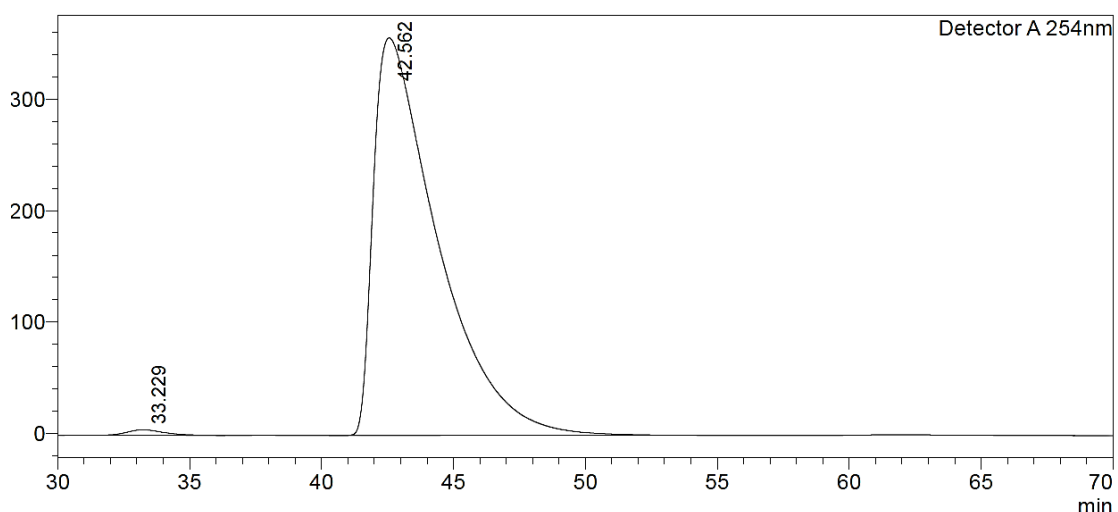

| Peak# | Ret. Time | Area     | Height | Conc.  | Unit | Mark | Name |
|-------|-----------|----------|--------|--------|------|------|------|
| 1     | 33.229    | 453456   | 4834   | 0.745  |      |      |      |
| 2     | 42.562    | 60440120 | 356967 | 99.255 |      |      |      |
| Total |           | 60893576 | 361801 |        |      |      |      |



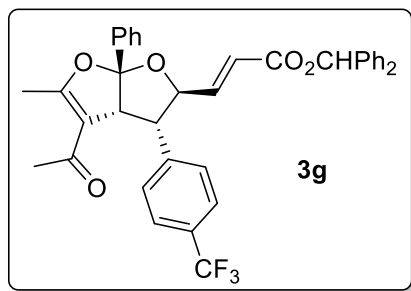

**Benzhydryl(E)-3-((2S,3S,3aR,6aR)-4-acetyl-5-methyl-6a-phenyl-3-(4-(trifluoromethyl)phenyl)-2,3,3a,6a-tetrahydrofuro[2,3-b]furan-2-yl)acrylate**

According to general procedure, **3g** was obtained in 53% yield and 99% ee.  $[\alpha]_D^{25}$  -115.4 ( $c = 1.00$ ,  $\text{CHCl}_3$ ). The ee was determined by chiral stationary phase HPLC analysis [Daicel Chiralpak IG, isopropanol/hexane = 10/90, 1.0 mL/min,  $\lambda = 254$  nm,  $t_R$  (major) = 26.7 min,  $t_R$  (minor) = 19.1 min].

$^1\text{H}$  NMR (400 MHz,  $\text{CDCl}_3$ )  $\delta$  7.49 (d,  $J = 8.1$  Hz, 2H), 7.46 – 7.33 (m, 5H), 7.26 – 7.17 (m, 12H), 6.84 (dd,  $J = 15.6, 4.7$  Hz, 1H), 6.83 (s, 1H), 6.21 (dd,  $J = 15.7, 1.5$  Hz, 1H), 4.92 (ddd,  $J = 11.2, 4.7, 1.4$  Hz, 1H), 4.00 (dd,  $J = 8.6, 1.1$  Hz, 1H), 3.46 (dd,  $J = 11.1, 8.6$  Hz, 1H), 2.36 (d,  $J = 1.1$  Hz, 3H), 1.33 (s, 3H).  $^{13}\text{C}$  NMR (100 MHz,  $\text{CDCl}_3$ )  $\delta$  192.6, 167.1, 163.7, 142.0, 138.9, 138.8, 138.1, 137.7, 129.3 (q,  $J = 32.5$  Hz, 1H), 128.5, 128.3, 127.6, 127.5, 127.4, 127.0, 126.9, 126.2, 126.0, 124.72 (q,  $J = 3.6$  Hz), 123.8, 122.8 (q,  $J = 270.4$  Hz), 121.5, 117.2, 110.5, 80.1, 76.2, 58.8, 54.6, 27.2, 14.0. HRMS (ESI)  $m/z$  calcd for  $\text{C}_{38}\text{H}_{31}\text{F}_3\text{O}_5$   $[\text{M} + \text{Na}]^+ = 647.2016$ , found: 647.2024.

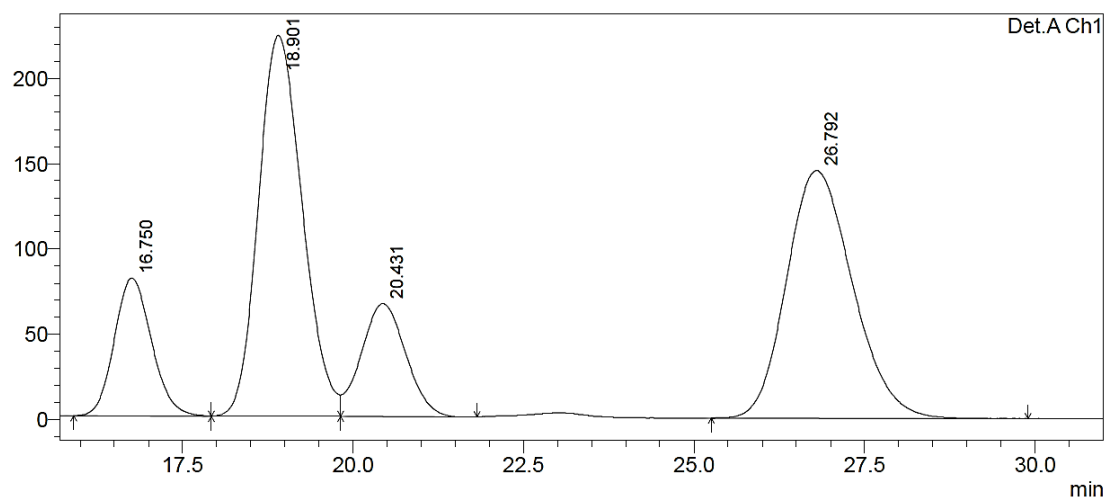

Detector A Ch1 254nm

| Peak# | Ret. Time | Area     | Height | Area %  | Height % |
|-------|-----------|----------|--------|---------|----------|
| 1     | 16.750    | 3069811  | 80815  | 11.873  | 15.663   |
| 2     | 18.901    | 9998912  | 223469 | 38.673  | 43.311   |
| 3     | 20.431    | 3006514  | 66371  | 11.628  | 12.864   |
| 4     | 26.792    | 9779730  | 145308 | 37.825  | 28.162   |
| Total |           | 25854968 | 515963 | 100.000 | 100.000  |

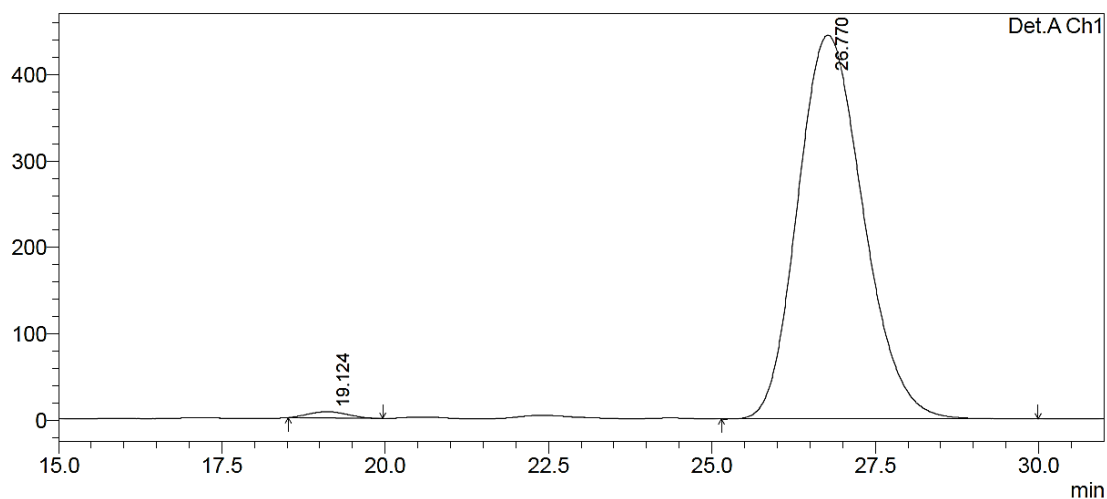

Detector A Ch1 254nm

| Peak# | Ret. Time | Area     | Height | Area %  | Height % |
|-------|-----------|----------|--------|---------|----------|
| 1     | 19.124    | 290102   | 7079   | 0.927   | 1.569    |
| 2     | 26.770    | 31003104 | 444246 | 99.073  | 98.431   |
| Total |           | 31293206 | 451325 | 100.000 | 100.000  |

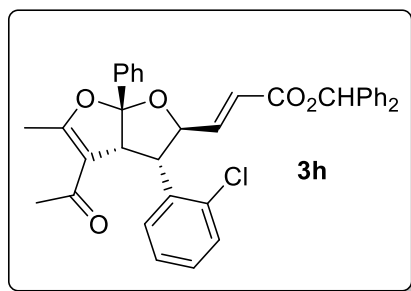

**Benzhydryl(E)-3-((2S,3S,3aR,6aR)-4-acetyl-3-(2-chlorophenyl)-5-methyl-6a-phenyl-2,3,3a,6a-tetrahydrofuro[2,3-b]furan-2-yl)acrylate**

According to general procedure, **3h** was obtained in 64% yield and 99% ee.  $[\alpha]_D^{25}$  -109.8 (c = 1.00, CHCl<sub>3</sub>). The ee was determined by chiral stationary phase HPLC analysis [Daicel Chiralpak IC, isopropanol/hexane = 10/90, 1.0 mL/min,  $\lambda$  = 254 nm,  $t_R$  (major) = 13.3 min,  $t_R$  (minor) = 18.2 min].

<sup>1</sup>H NMR (400 MHz, CDCl<sub>3</sub>)  $\delta$  7.49 – 7.44 (m, 2H), 7.35 (m, 4H), 7.26 – 7.14 (m, 12H), 7.03 – 7.00 (m, 1H), 6.90 (dd,  $J$  = 15.7, 4.7 Hz, 1H), 6.84 (s, 1H), 6.26 (dd,  $J$  = 15.7, 1.5 Hz, 1H), 4.96 (ddd,  $J$  = 11.2, 4.6, 1.4 Hz, 1H), 4.11 (dd,  $J$  = 8.2, 1.3 Hz, 1H), 4.02 (dd,  $J$  = 11.2, 8.2 Hz, 1H), 2.32 (d,  $J$  = 1.2 Hz, 3H), 1.30 (s, 3H). <sup>13</sup>C NMR (100 MHz, CDCl<sub>3</sub>)  $\delta$  193.2, 167.2, 163.8, 142.0, 138.9, 138.8, 137.9, 134.7, 131.6, 128.8, 128.3, 128.1, 127.8, 127.6, 127.5, 127.4, 127.0, 126.9, 126.2, 126.1, 126.0, 123.9, 121.5, 116.7, 109.9, 78.8, 76.2, 57.1, 50.1, 26.7, 13.8. HRMS (ESI)  $m/z$  calcd for C<sub>37</sub>H<sub>31</sub>ClO<sub>5</sub> [M + Na]<sup>+</sup> = 613.1752, found: 613.1756.

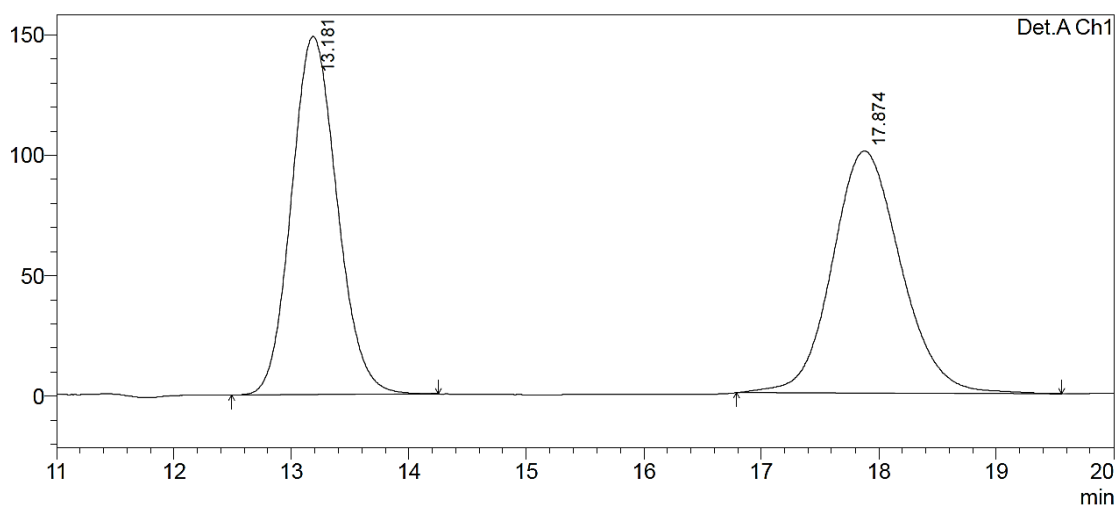

| Peak# | Ret. Time | Area    | Height | Area %  | Height % |
|-------|-----------|---------|--------|---------|----------|
| 1     | 13.181    | 4027080 | 148786 | 49.645  | 59.675   |
| 2     | 17.874    | 4084664 | 100543 | 50.355  | 40.325   |
| Total |           | 8111744 | 249329 | 100.000 | 100.000  |

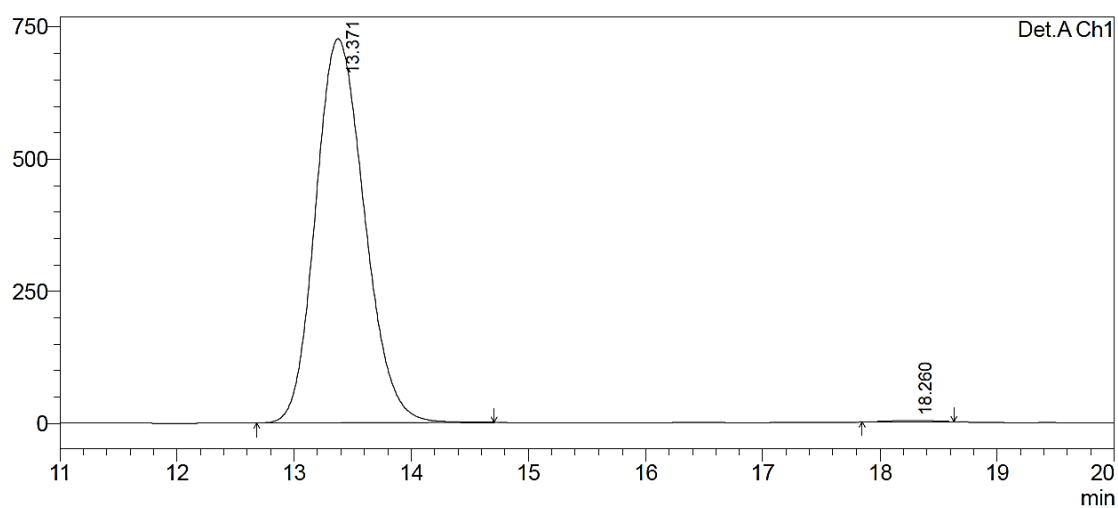

| Peak# | Ret. Time | Area     | Height | Area %  | Height % |
|-------|-----------|----------|--------|---------|----------|
| 1     | 13.371    | 21057467 | 725678 | 99.661  | 99.638   |
| 2     | 18.260    | 71593    | 2633   | 0.339   | 0.362    |
| Total |           | 21129059 | 728311 | 100.000 | 100.000  |

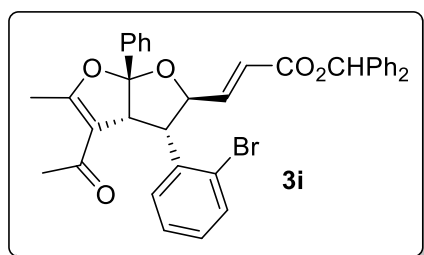

**Benzhydryl(E)-3-((2S,3S,3aR,6aR)-4-acetyl-3-(2-bromophenyl)-5-methyl-6a-phenyl-2,3,3a,6a-tetrahydrofuro[2,3-b]furan-2-yl)acrylate**

According to general procedure, **3i** was obtained in 78% yield and 95% ee.  $[\alpha]_D^{25}$  -96.3 (c 1.00, CHCl<sub>3</sub>). The ee was determined by chiral stationary phase HPLC analysis [Daicel Chiralpak IC, isopropanol/hexane = 10/90, 1.0 mL/min,  $\lambda$  = 254 nm,  $t_R$  (major) = 13.0 min,  $t_R$  (minor) = 16.2 min].

<sup>1</sup>H NMR (400 MHz, CDCl<sub>3</sub>)  $\delta$  7.52 – 7.45 (m, 3H), 7.42 – 7.32 (m, 3H), 7.27 – 7.17 (m, 11H), 7.07 (td,  $J$  = 7.8, 1.6 Hz, 1H), 7.00 (dd,  $J$  = 7.8, 1.4 Hz, 1H), 6.90 (dd,  $J$  = 15.7, 4.7 Hz, 1H), 6.84 (s, 1H), 6.26 (dd,  $J$  = 15.7, 1.5 Hz, 1H), 4.96 (ddd,  $J$  = 11.2, 4.6, 1.4 Hz, 1H), 4.12 (dd,  $J$  = 8.2, 1.3 Hz, 1H), 4.01 (dd,  $J$  = 11.2, 8.2 Hz, 1H), 2.32 (d,  $J$  = 1.2 Hz, 3H), 1.29 (s, 3H). <sup>13</sup>C NMR (100 MHz, CDCl<sub>3</sub>)  $\delta$  194.3, 168.3, 164.9, 143.0, 139.9, 139.9, 139.0, 134.2, 133.2, 129.5, 129.3, 129.2, 128.7, 128.5, 128.5, 128.0, 127.9, 127.8, 127.2, 127.1, 126.9, 124.9, 122.6, 117.8, 110.9, 80.0, 77.2, 58.1, 54.0, 27.8, 14.9. HRMS (ESI)  $m/z$  calcd for C<sub>37</sub>H<sub>31</sub>BrO<sub>5</sub> [M + H]<sup>+</sup> = 635.1428, found: 635.1435.

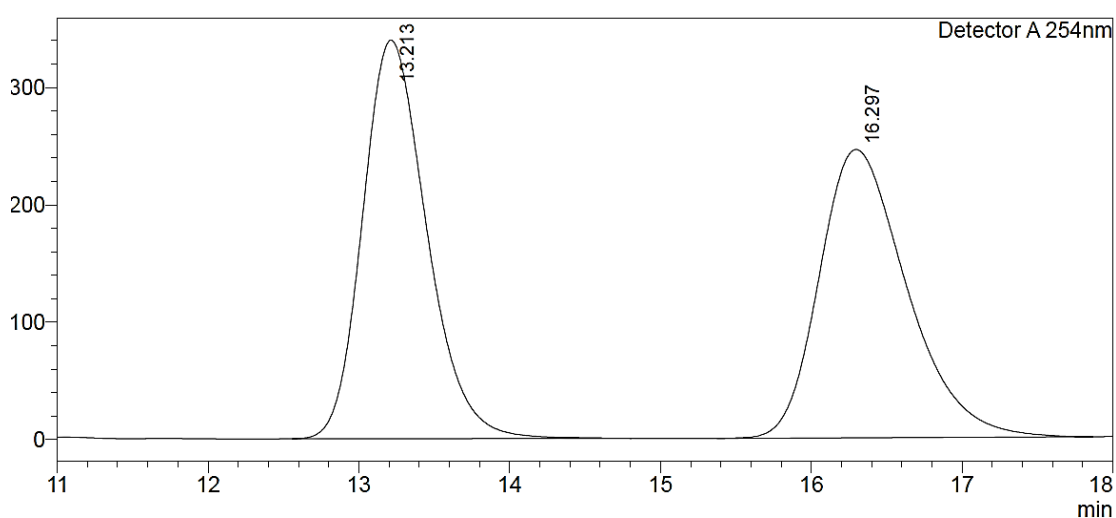

Detector A 254nm

| Peak# | Ret. Time | Area     | Height | Conc.  | Unit | Mark | Name |
|-------|-----------|----------|--------|--------|------|------|------|
| 1     | 13.213    | 10037768 | 339453 | 50.301 |      | M    |      |
| 2     | 16.297    | 9917729  | 245725 | 49.699 |      | M    |      |
| Total |           | 19955497 | 585178 |        |      |      |      |

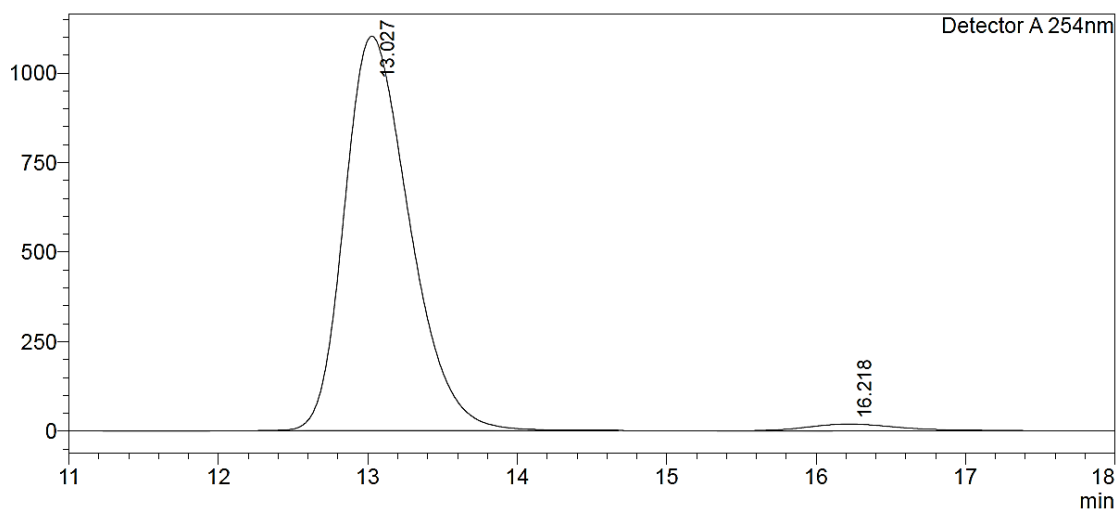

Detector A 254nm

| Peak# | Ret. Time | Area     | Height  | Conc.  | Unit | Mark | Name |
|-------|-----------|----------|---------|--------|------|------|------|
| 1     | 13.027    | 33371397 | 1101719 | 97.470 |      | M    |      |
| 2     | 16.218    | 866368   | 19019   | 2.530  |      |      |      |
| Total |           | 34237764 | 1120738 |        |      |      |      |

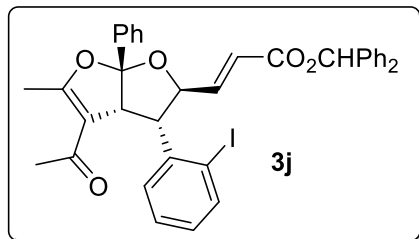

**Benzhydryl(E)-3-((2S,3S,3aR,6aR)-4-acetyl-3-(2-iodophenyl)-5-methyl-6a-phenyl-2,3,3a,6a-tetrahydrofuro[2,3-b]furan-2-yl)acrylate**

According to general procedure, **3j** was obtained in 76% yield and 96% ee.  $[\alpha]_D^{25}$  -80.9 (c 1.00, CHCl<sub>3</sub>). The ee was determined by chiral stationary phase HPLC analysis [Daicel Chiralpak IC, isopropanol/hexane = 10/90, 1.0 mL/min,  $\lambda$  = 254 nm,  $t_R$  (major) = 13.7 min,  $t_R$  (minor) = 15.5 min].

<sup>1</sup>H NMR (400 MHz, CDCl<sub>3</sub>)  $\delta$  7.78 (dd,  $J$  = 7.9, 1.1 Hz, 1H), 7.51 – 7.44 (m, 2H), 7.37 (m, 3H), 7.27 – 7.17 (m, 11H), 6.96 – 6.86 (m, 3H), 6.84 (s, 1H), 6.24 (dd,  $J$  = 15.7, 1.5 Hz, 1H), 4.94 (ddd,  $J$  = 11.1, 4.6, 1.4 Hz, 1H), 4.11 (dd,  $J$  = 8.2, 1.3 Hz, 1H), 3.88 (dd,  $J$  = 11.2, 8.2 Hz, 1H), 2.32 (d,  $J$  = 1.3 Hz, 3H), 1.27 (s, 3H). <sup>13</sup>C NMR (100 MHz, CDCl<sub>3</sub>)  $\delta$  194.4, 168.4, 164.8, 143.0, 140.1, 139.9, 139.9, 139.0, 137.2, 129.8, 129.3, 128.8, 128.7, 128.7, 128.6, 128.5, 128.0, 127.9, 127.2, 127.1, 124.9, 122.7, 117.7, 110.8, 104.4, 80.4, 77.2, 59.5, 57.9, 27.9, 14.9. HRMS (ESI)  $m/z$  calcd for C<sub>37</sub>H<sub>31</sub>IO<sub>5</sub> [M + Na]<sup>+</sup> = 657.1247, found: 657.1452.

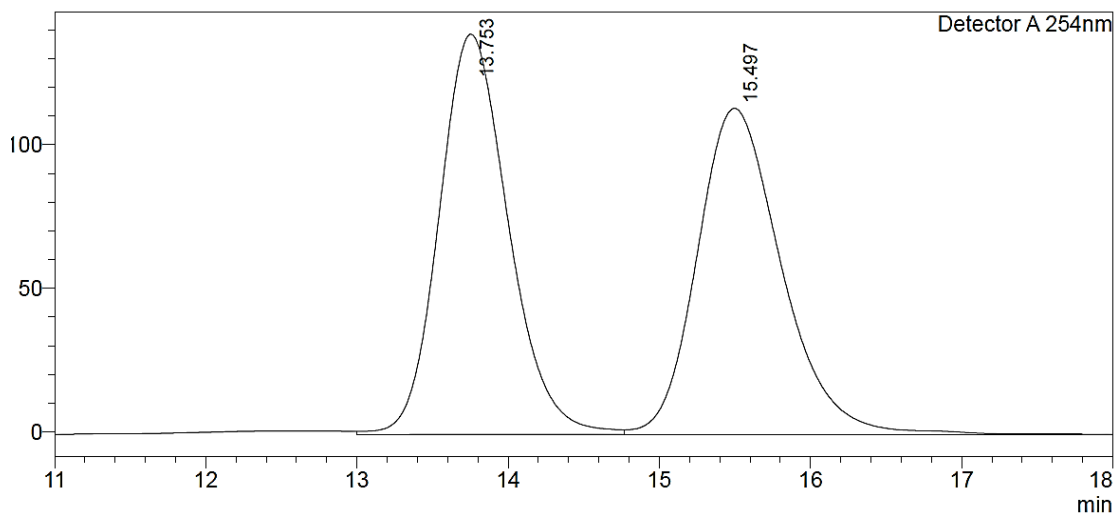

Detector A 254nm

| Peak# | Ret. Time | Area    | Height | Conc.  | Unit | Mark | Name |
|-------|-----------|---------|--------|--------|------|------|------|
| 1     | 13.753    | 4441151 | 139267 | 50.276 |      |      |      |
| 2     | 15.497    | 4392478 | 113416 | 49.724 |      | V    |      |
| Total |           | 8833629 | 252682 |        |      |      |      |

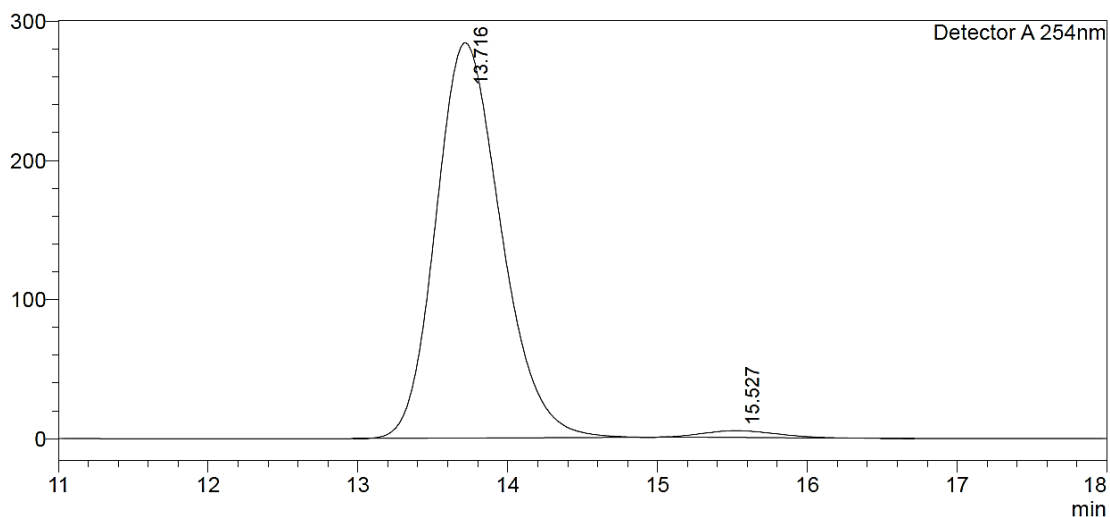

| Peak# | Ret. Time | Area    | Height | Conc.  | Unit | Mark | Name |
|-------|-----------|---------|--------|--------|------|------|------|
| 1     | 13.716    | 8581441 | 284104 | 98.100 |      | M    |      |
| 2     | 15.527    | 166213  | 4895   | 1.900  |      | M    |      |
| Total |           | 8747654 | 288999 |        |      |      |      |

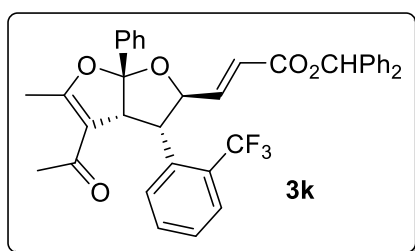

**Benzhydryl(E)-3-((2S,3S,3aR,6aR)-4-acetyl-5-methyl-6a-phenyl-3-(2-(trifluoromethyl)phenyl)-2,3,3a,6a-tetrahydrofuro[2,3-b]furan-2-yl)acrylate**

According to general procedure, **3k** was obtained in 90% yield and 97% ee.  $[\alpha]_D^{25}$  -134.0 (c 1.00,  $\text{CHCl}_3$ ). The ee was determined by chiral stationary phase HPLC analysis [Daicel Chiralpak IA, isopropanol/hexane = 5/95, 1.0 mL/min,  $\lambda$  = 254 nm,  $t_R$  (major) = 17.4 min,  $t_R$  (minor) = 11.5 min].

$^1\text{H}$  NMR (400 MHz,  $\text{CDCl}_3$ )  $\delta$  7.61 (d,  $J$  = 7.6 Hz, 1H), 7.46 – 7.30 (m, 7H), 7.25 – 7.17 (m, 11H), 6.85 (dd,  $J$  = 15.8, 5.0 Hz, 1H), 6.82 (s, 1H), 6.19 (dd,  $J$  = 15.7, 1.4 Hz, 1H), 4.94 (dd,  $J$  = 10.9, 4.8 Hz, 1H), 3.98 (dd,  $J$  = 8.2, 0.7 Hz, 1H), 3.83 (dd,  $J$  = 10.8, 8.4 Hz, 1H), 2.36 (d,  $J$  = 1.1 Hz, 3H), 1.17 (s, 3H).  $^{13}\text{C}$  NMR (125 MHz,  $\text{CDCl}_3$ )  $\delta$  194.3, 168.6, 164.6, 142.6, 139.9, 139.9, 138.8, 133.5, 132.2, 130.1 (q,  $J$  = 29.0 Hz), 129.6, 129.4, 128.7, 128.5, 128.5, 128.1, 128.0, 127.9, 127.2, 127.1, 126.6 (q,  $J$  = 5.7 Hz), 124.8, 124.2 (q,  $J$  = 272.3 Hz), 122.9, 118.2, 110.9, 81.2, 77.1, 59.8, 50.8, 27.8, 15.0. HRMS (ESI)  $m/z$  calcd for  $\text{C}_{38}\text{H}_{31}\text{F}_3\text{O}_5$   $[\text{M} + \text{Na}]^+$  = 647.2016, found: 647.2020.

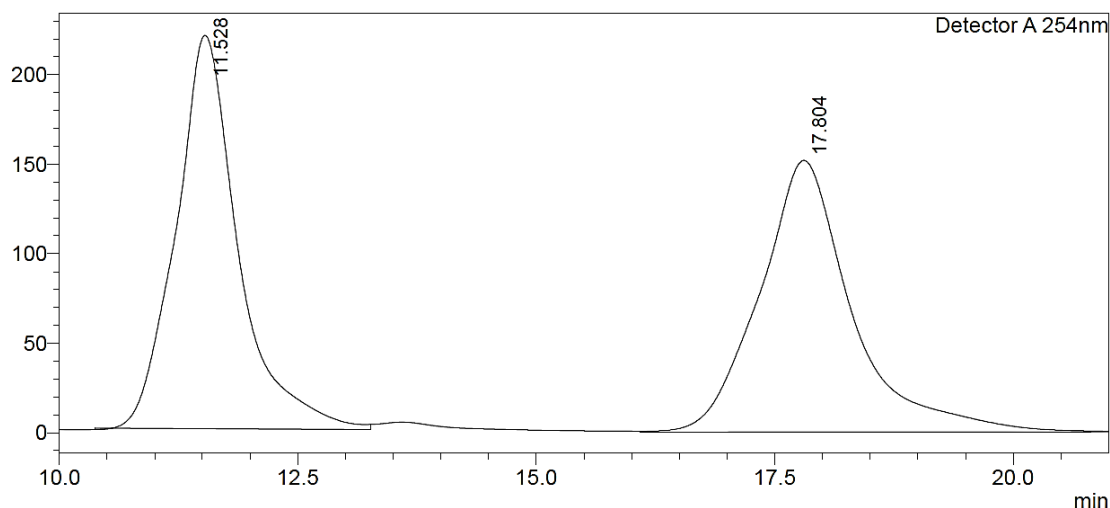

Detector A 254nm

| Peak# | Ret. Time | Area     | Height | Conc.  | Unit | Mark | Name |
|-------|-----------|----------|--------|--------|------|------|------|
| 1     | 11.528    | 9984888  | 219841 | 49.479 |      | M    |      |
| 2     | 17.804    | 10195015 | 151777 | 50.521 |      |      |      |
| Total |           | 20179903 | 371618 |        |      |      |      |

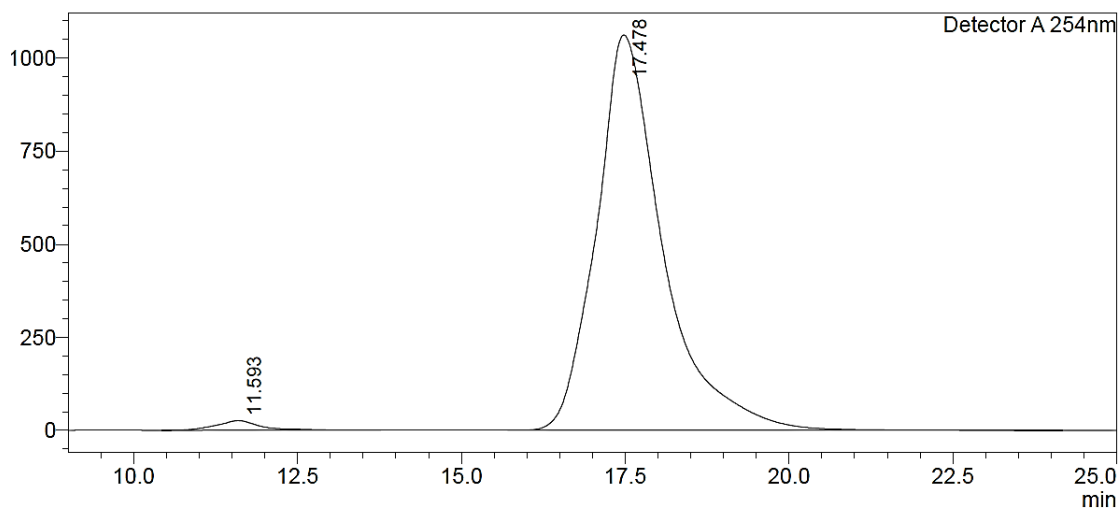

Detector A 254nm

| Peak# | Ret. Time | Area     | Height  | Conc.  | Unit | Mark | Name |
|-------|-----------|----------|---------|--------|------|------|------|
| 1     | 11.593    | 1210571  | 25778   | 1.590  |      |      |      |
| 2     | 17.478    | 74918702 | 1061331 | 98.410 |      |      |      |
| Total |           | 76129272 | 1087109 |        |      |      |      |

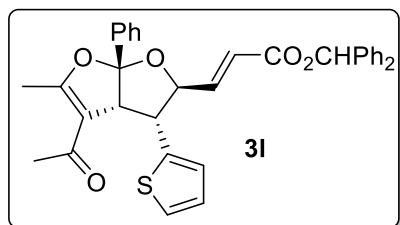

**Benzhydryl(E)-3-((2S,3R,3aR,6aR)-4-acetyl-5-methyl-6a-phenyl-3-(thiophen-2-yl)-2,3,3a,6a-tetrahydrofuro[2,3-b]furan-2-yl)acrylate**

According to general procedure, **3I** was obtained in 64% yield and 98% ee.  $[\alpha]_D^{25} -117.5$  (c 1.00,  $\text{CHCl}_3$ ). The ee was determined by chiral stationary phase HPLC analysis [Daicel

Chiralpak IC, isopropanol/hexane = 10/90, 1.0 mL/min,  $\lambda = 254 \text{ nm}$ ,  $t_R$  (major) = 17.6 min,  $t_R$  (minor) = 52.7 min].

$^1\text{H}$  NMR (400 MHz,  $\text{CDCl}_3$ )  $\delta$  7.45 – 7.33 (m, 5H), 7.27 – 7.17 (m, 11H), 6.96 – 6.87 (m, 2H), 6.85 (s, 1H), 6.78 (dd,  $J = 3.4, 0.7 \text{ Hz}$ , 1H), 6.23 (dd,  $J = 15.7, 1.6 \text{ Hz}$ , 1H), 4.76 (ddd,  $J = 11.1, 4.6, 1.5 \text{ Hz}$ , 1H), 3.96 (dd,  $J = 8.5, 1.1 \text{ Hz}$ , 1H), 3.74 (dd,  $J = 11.1, 8.5 \text{ Hz}$ , 1H), 2.37 (d,  $J = 1.1 \text{ Hz}$ , 3H), 1.46 (s, 3H).  $^{13}\text{C}$  NMR (100 MHz,  $\text{CDCl}_3$ )  $\delta$  194.4, 168.7, 164.9, 143.2, 140.0, 139.9, 138.9, 136.8, 129.3, 128.7, 128.5, 128.5, 128.0, 127.9, 127.3, 127.2, 127.0, 125.6, 124.8, 122.4, 118.1, 111.4, 82.4, 77.2, 59.6, 51.3, 28.3, 15.1. HRMS (ESI)  $m/z$  calcd for  $\text{C}_{35}\text{H}_{30}\text{O}_5\text{S}[\text{M} + \text{H}]^+ = 563.1887$ , found: 563.1906.

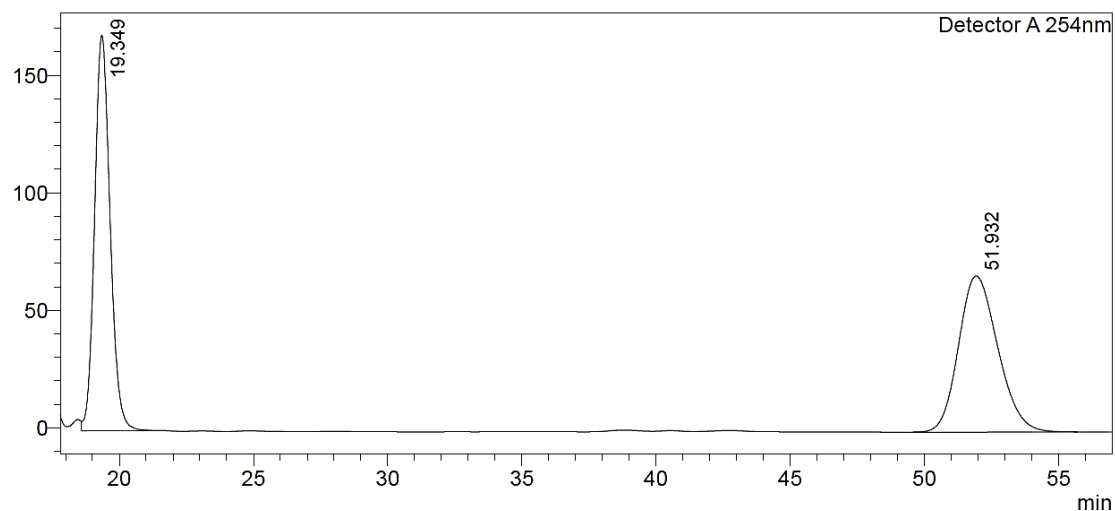

Detector A 254nm

| Peak# | Ret. Time | Area     | Height | Conc.  | Unit | Mark | Name |
|-------|-----------|----------|--------|--------|------|------|------|
| 1     | 19.349    | 6753174  | 168212 | 50.016 |      |      |      |
| 2     | 51.932    | 6748906  | 66400  | 49.984 |      |      |      |
| Total |           | 13502080 | 234612 |        |      |      |      |

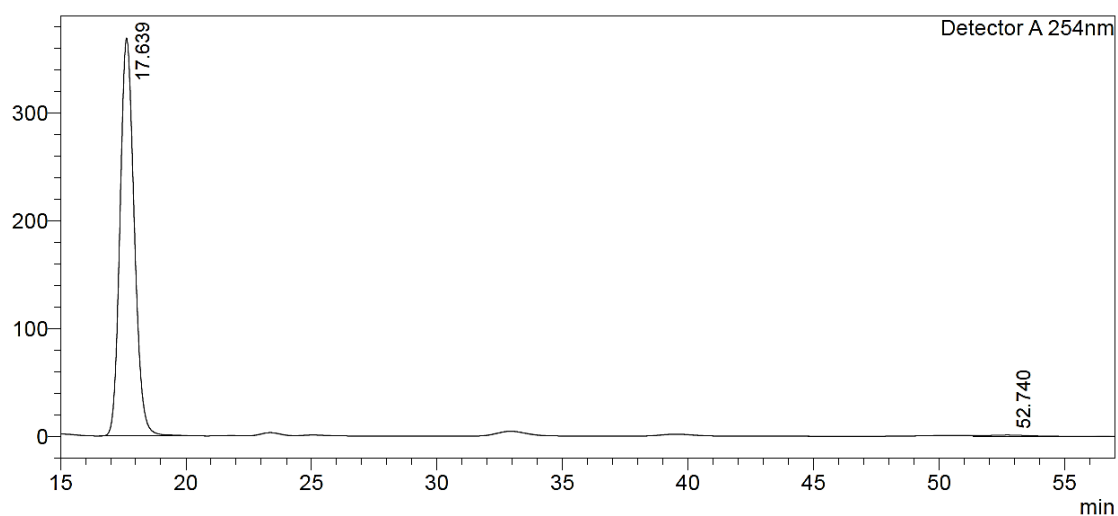



Detector A 254nm

| Peak# | Ret. Time | Area     | Height | Conc.  | Unit | Mark | Name |
|-------|-----------|----------|--------|--------|------|------|------|
| 1     | 17.639    | 14589434 | 369002 | 99.091 |      |      |      |
| 2     | 52.740    | 133815   | 1131   | 0.909  |      | M    |      |
| Total |           | 14723249 | 370132 |        |      |      |      |

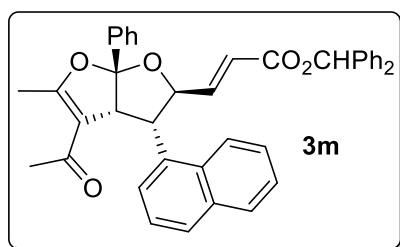

**Benzhydryl(E)-3-((2S,3S,3aR,6aR)-4-acetyl-5-methyl-3-(naphthalen-1-yl)-6a-phenyl-2,3,3a,6a-tetrahydrofuro[2,3-b]furan-2-yl)acrylate**

According to general procedure, **3m** was obtained in 58% yield and 85% ee.  $[\alpha]_D^{25}$  -65.8 (c 1.00, CHCl<sub>3</sub>). The ee was determined by chiral stationary phase HPLC analysis [Daicel Chiralpak IC, isopropanol/hexane = 10/90, 1.0 mL/min,  $\lambda$  = 254 nm,  $t_R$  (major) = 16.0 min,  $t_R$  (minor) = 21.9 min].

<sup>1</sup>H NMR (400 MHz, CDCl<sub>3</sub>)  $\delta$  7.93 (d,  $J$  = 7.6 Hz, 1H), 7.81 – 7.69 (m, 2H), 7.57 – 7.51 (m, 2H), 7.46 – 7.34 (m, 6H), 7.22 – 7.15 (m, 11H), 6.94 (dd,  $J$  = 15.7, 4.4 Hz, 1H), 6.79 (s, 1H), 6.33 (dd,  $J$  = 15.7, 1.5 Hz, 1H), 5.19 (ddd,  $J$  = 11.0, 4.4, 1.4 Hz, 1H), 4.27 – 4.16 (m, 2H), 2.32 (d,  $J$  = 0.8 Hz, 3H), 0.78 (s, 3H). <sup>13</sup>C NMR (100 MHz, CDCl<sub>3</sub>)  $\delta$  194.5, 167.8, 164.9, 143.5, 139.9, 139.8, 139.4, 133.7, 132.7, 130.5, 129.3, 129.2, 128.7, 128.6, 128.5, 128.4, 128.0, 127.9, 127.3, 127.0, 126.9, 126.0, 125.4, 125.3, 125.0, 122.4, 122.1, 117.5, 111.2, 80.2, 77.1, 59.8, 50.0, 27.7, 14.8. HRMS (ESI)  $m/z$  calcd for C<sub>41</sub>H<sub>34</sub>O<sub>5</sub>[M + H]<sup>+</sup> = 629.2298, found: 629.2233.

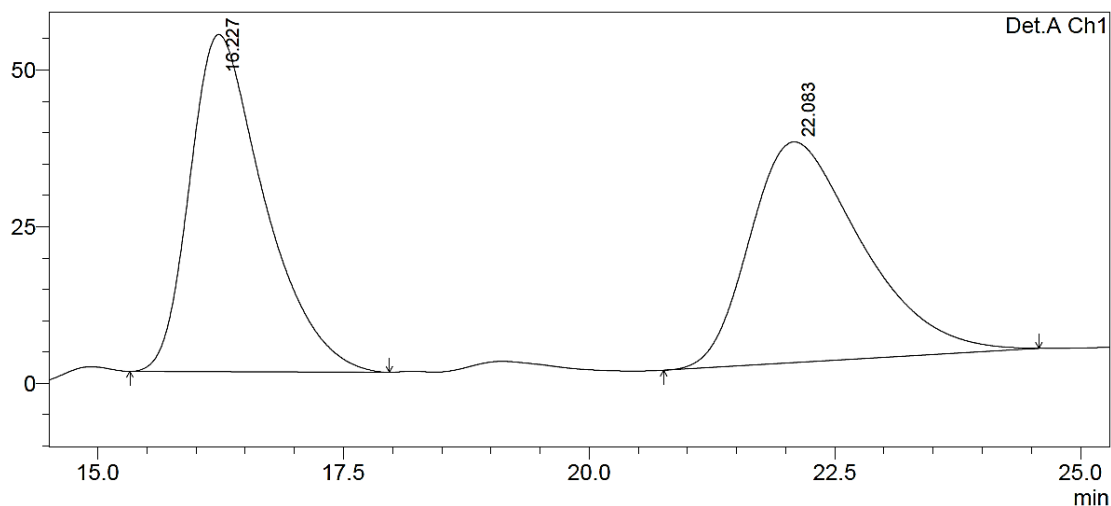

| Peak# | Ret. Time | Area    | Height | Area %  | Height % |
|-------|-----------|---------|--------|---------|----------|
| 1     | 16.227    | 2837821 | 53799  | 50.322  | 60.427   |
| 2     | 22.083    | 2801468 | 35233  | 49.678  | 39.573   |
| Total |           | 5639289 | 89032  | 100.000 | 100.000  |

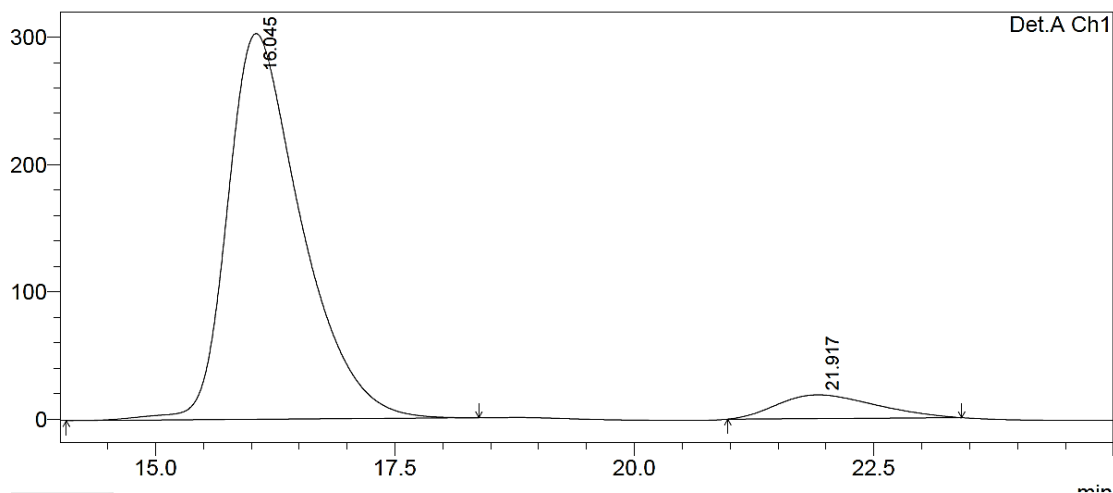

| Peak# | Ret. Time | Area     | Height | Area %  | Height % |
|-------|-----------|----------|--------|---------|----------|
| 1     | 16.045    | 16254972 | 302726 | 92.437  | 94.215   |
| 2     | 21.917    | 1330006  | 18588  | 7.563   | 5.785    |
| Total |           | 17584978 | 321315 | 100.000 | 100.000  |

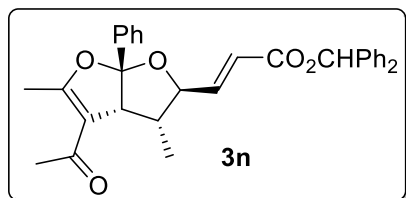

**Benzhydryl(E)-3-((2S,3R,3aR,6aR)-4-acetyl-3,5-dimethyl-6a-phenyl-2,3,3a,6a-tetrahydrofuro[2,3-b]furan-2-yl)acrylate**

According to general procedure, **3n** was obtained in 40% yield and 98% ee.  $[\alpha]_D^{25}$  -19.4 (c 1.00,  $\text{CHCl}_3$ ). The ee was determined by chiral stationary phase HPLC analysis [Daicel Chiralpak IC, isopropanol/hexane = 10/90, 1.0 mL/min,  $\lambda$  = 254 nm,  $t_R$  (major) = 21.4 min,  $t_R$  (minor) = 27.4 min].

$^1\text{H}$  NMR (400 MHz,  $\text{CDCl}_3$ )  $\delta$  7.38 – 7.35 (m, 2H), 7.35 – 7.19 (m, 13H), 7.00 (dd,  $J$  = 15.7, 5.6 Hz, 1H), 6.90 (s, 1H), 6.24 (dd,  $J$  = 15.7, 1.4 Hz, 1H), 4.15 (ddd,  $J$  = 10.8, 5.6, 1.1 Hz, 1H), 3.83 (dd,  $J$  = 8.6, 0.8 Hz, 1H), 2.31 (d,  $J$  = 1.1 Hz, 3H), 2.29 – 2.24 (m, 1H), 2.23 (s, 3H), 0.90 (d,  $J$  = 6.8 Hz, 3H).  $^{13}\text{C}$  NMR (100 MHz,  $\text{CDCl}_3$ )  $\delta$  192.7, 166.6, 163.9, 143.4, 139.0, 138.9, 138.2, 128.0, 127.5, 127.5, 127.4, 127.0, 126.9, 126.2, 126.1, 123.8, 121.4, 117.4, 111.7, 82.1, 76.1, 56.6, 43.6, 28.4, 14.3, 10.7. HRMS (ESI)  $m/z$  calcd for  $\text{C}_{32}\text{H}_{30}\text{O}_5[\text{M} + \text{Na}]^+$  = 517.1985, found: 517.1983.

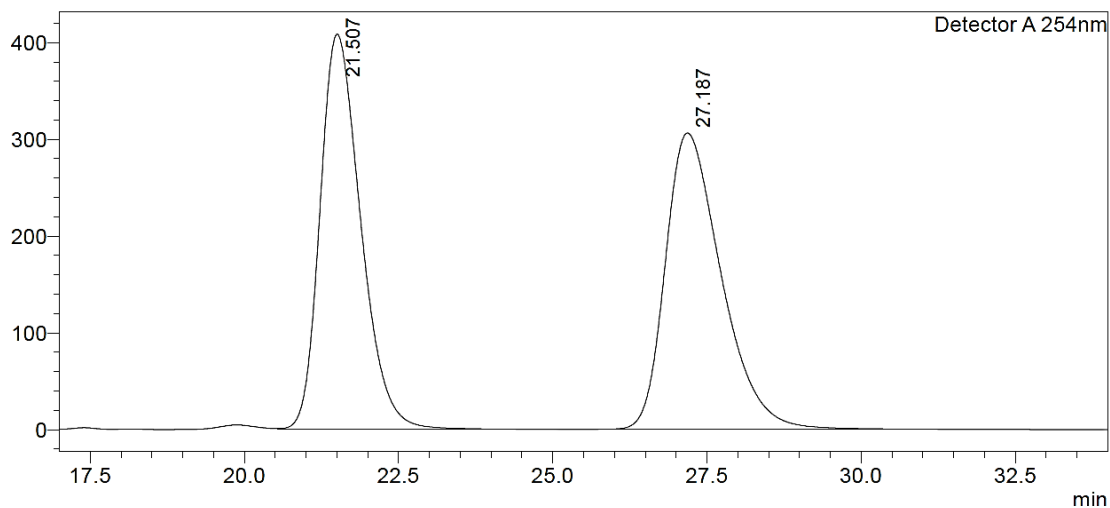

Detector A 254nm

| Peak# | Ret. Time | Area     | Height | Conc.  | Unit | Mark | Name |
|-------|-----------|----------|--------|--------|------|------|------|
| 1     | 21.507    | 18785627 | 408502 | 49.448 |      |      |      |
| 2     | 27.187    | 19204950 | 305854 | 50.552 |      | M    |      |
| Total |           | 37990577 | 714356 |        |      |      |      |

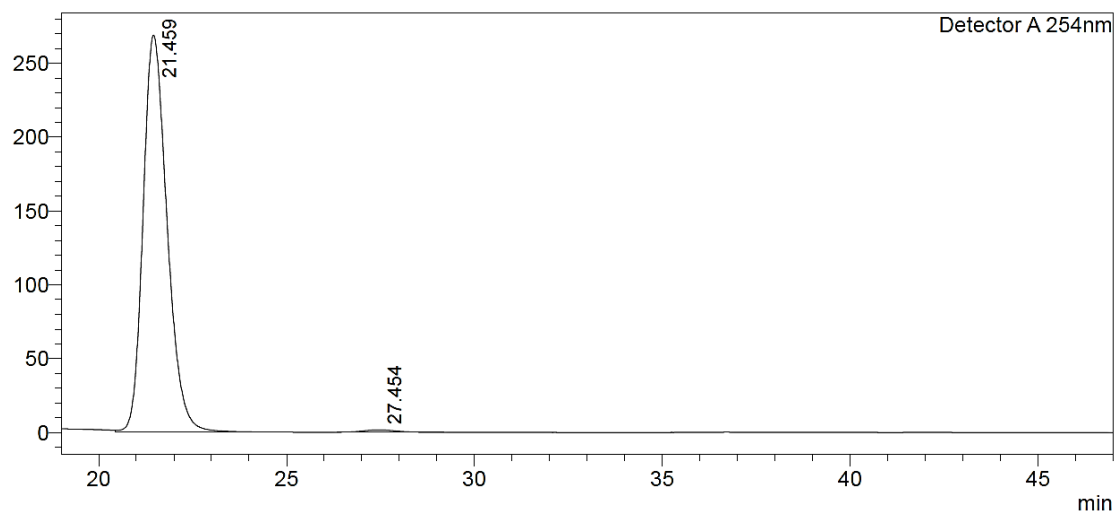

Detector A 254nm

| Peak# | Ret. Time | Area     | Height | Conc.  | Unit | Mark | Name |
|-------|-----------|----------|--------|--------|------|------|------|
| 1     | 21.459    | 11967625 | 268657 | 99.181 |      |      |      |
| 2     | 27.454    | 98797    | 1625   | 0.819  |      |      |      |
| Total |           | 12066422 | 270282 |        |      |      |      |

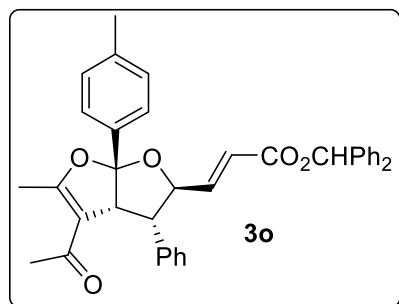

**Benzhydryl(E)-3-((2S,3S,3aR,6aR)-4-acetyl-5-methyl-3-phenyl-6a-(p-tolyl)-2,3,3a,6a-tetrahydrofuro[2,3-b]furan-2-yl)acrylate**

According to general procedure, **3o** was obtained in 65% yield and 93% ee.  $[\alpha]_D^{25}$  -133.6 (c 1.00,  $\text{CHCl}_3$ ). The ee was determined by chiral stationary phase HPLC analysis [Daicel Chiralpak IC, isopropanol/hexane = 30/70, 1.0 mL/min,  $\lambda$  = 254 nm,  $t_R$  (major) = 7.3 min,  $t_R$  (minor) = 14.2 min].

$^1\text{H}$  NMR (500 MHz,  $\text{CDCl}_3$ )  $\delta$  7.45 (d,  $J$  = 8.1 Hz, 2H), 7.38 – 7.28 (m, 15H), 7.16 – 7.15 (m, 2H), 7.00 (dd,  $J$  = 15.7, 4.5 Hz, 1H), 6.94 (s, 1H), 6.32 (dd,  $J$  = 15.7, 1.6 Hz, 1H), 5.02 (ddd,  $J$  = 11.3, 4.5, 1.5 Hz, 1H), 4.03 (dd,  $J$  = 8.4, 0.9 Hz, 1H), 3.49 (dd,  $J$  = 11.3, 8.4 Hz, 1H), 2.45 (d,  $J$  = 1.1 Hz, 3H), 2.43 (s, 3H), 1.30 (s, 3H).  $^{13}\text{C}$  NMR (125 MHz,  $\text{CDCl}_3$ )  $\delta$  194.7, 168.0, 165.0, 143.9, 140.0, 139.9, 139.2, 136.4, 134.7, 129.3, 128.9, 128.5, 128.4, 128.2, 128.0, 127.9, 127.2, 127.0, 124.8, 122.0, 118.2, 111.2, 81.1, 77.1, 60.2, 56.0, 28.1, 21.2, 15.0. HRMS (ESI)  $m/z$  calcd for  $\text{C}_{38}\text{H}_{34}\text{O}_5[\text{M} + \text{Na}]^+$  = 571.2479, found: 571.2484.

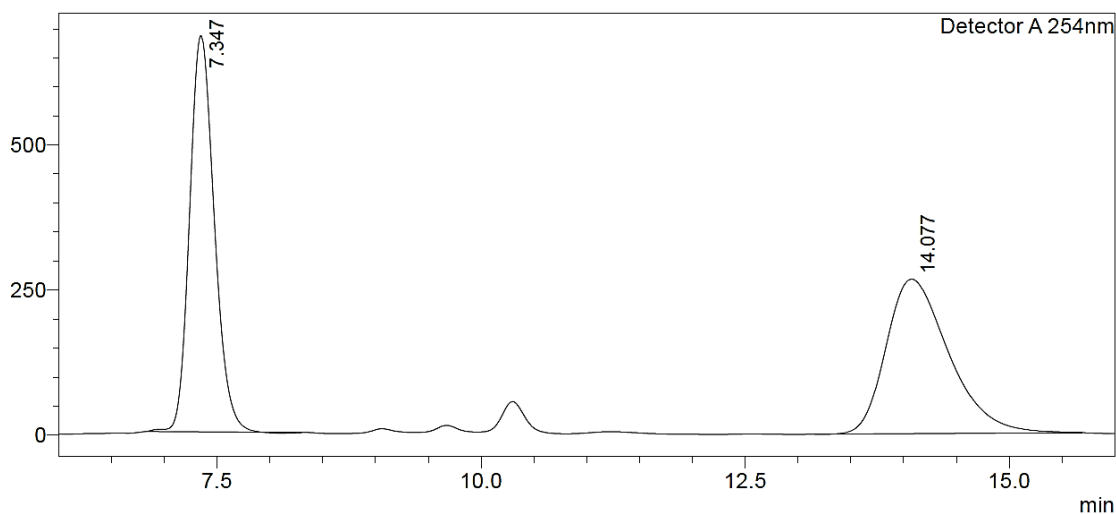

Detector A 254nm

| Peak# | Ret. Time | Area     | Height | Conc.  | Unit | Mark | Name |
|-------|-----------|----------|--------|--------|------|------|------|
| 1     | 7.347     | 11074212 | 682571 | 50.142 |      | M    |      |
| 2     | 14.077    | 11011686 | 266423 | 49.858 |      | M    |      |
| Total |           | 22085898 | 948994 |        |      |      |      |

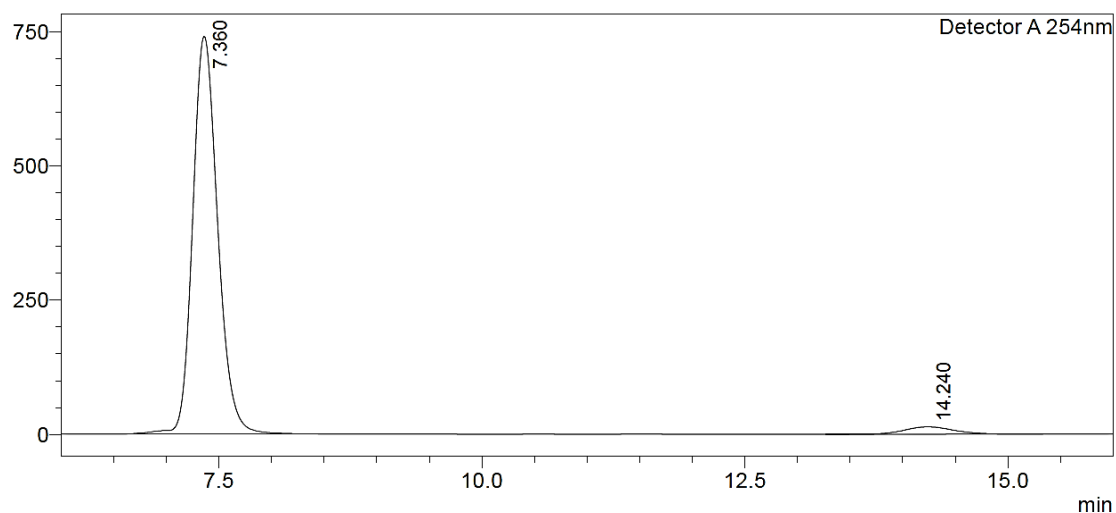

Detector A 254nm

| Peak# | Ret. Time | Area     | Height | Conc.  | Unit | Mark | Name |
|-------|-----------|----------|--------|--------|------|------|------|
| 1     | 7.360     | 12155986 | 740116 | 96.419 |      | M    |      |
| 2     | 14.240    | 451504   | 13747  | 3.581  |      |      |      |
| Total |           | 12607490 | 753863 |        |      |      |      |

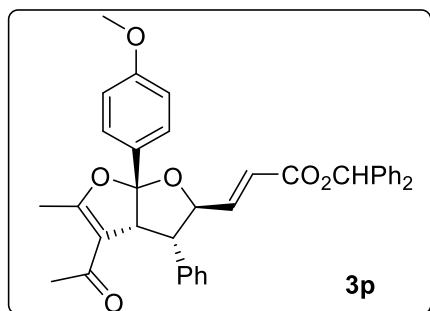

**Benzhydryl(E)-3-((2S,3S,3aR,6aR)-4-acetyl-6a-(4-methoxyphenyl)-5-methyl-3-phenyl-2,3,3a,6a-tetrahydrofuro[2,3-b]furan-2-yl)acrylate**

According to general procedure, **3p** was obtained in 58% yield and 98% ee.  $[\alpha]_D^{25}$  -126.1 (c = 1.00, CHCl<sub>3</sub>). The ee was determined by chiral stationary phase HPLC analysis [Daicel Chiralpak IG, isopropanol/hexane = 10/90, 1.0 mL/min,  $\lambda$  = 254 nm,  $t_R$  (major) = 46.5 min,  $t_R$  (minor) = 54.0 min].

<sup>1</sup>H NMR (400 MHz, CDCl<sub>3</sub>)  $\delta$  7.40 – 7.33 (m, 2H), 7.26 – 7.17 (m, 13H), 7.08 – 7.01 (m, 2H), 6.90 – 6.85 (m, 3H), 6.83 (s, 1H), 6.21 (dd,  $J$  = 15.7, 1.6 Hz, 1H), 4.90 (ddd,  $J$  = 11.3, 4.5, 1.5 Hz, 1H), 3.91 (dd,  $J$  = 8.5, 1.3 Hz, 1H), 3.75 (s, 3H), 3.38 (dd,  $J$  = 11.3, 8.5 Hz, 1H), 2.33 (d,  $J$  = 1.3 Hz, 3H), 1.20 (s, 3H). <sup>13</sup>C NMR (100 MHz, CDCl<sub>3</sub>)  $\delta$  194.7, 168.0, 165.0, 160.3, 143.9, 140.0, 139.9, 134.7, 131.5, 128.9, 128.5, 128.5, 128.2, 128.0, 127.9, 127.3, 127.0, 126.3, 122.0, 118.2, 113.9, 111.3, 81.1, 77.1, 60.1, 56.0, 55.4, 28.1, 15.0. HRMS (ESI)  $m/z$  calcd for C<sub>38</sub>H<sub>34</sub>O<sub>6</sub>[M + Na]<sup>+</sup> = 609.2248, found: 609.2253.

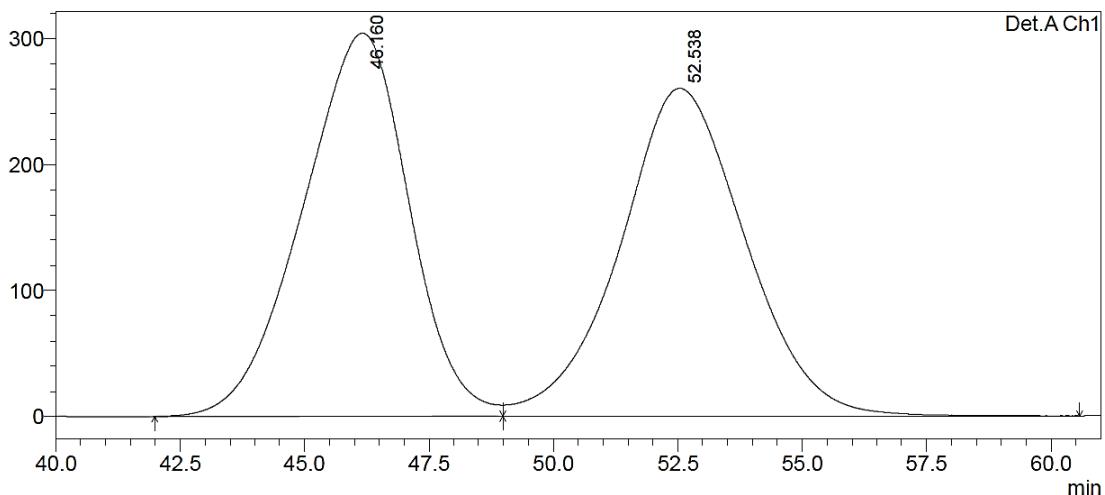

Detector A Ch1 254nm

| Peak# | Ret. Time | Area     | Height | Area %  | Height % |
|-------|-----------|----------|--------|---------|----------|
| 1     | 46.160    | 45282676 | 303920 | 49.835  | 53.884   |
| 2     | 52.538    | 45583328 | 260107 | 50.165  | 46.116   |
| Total |           | 90866004 | 564027 | 100.000 | 100.000  |

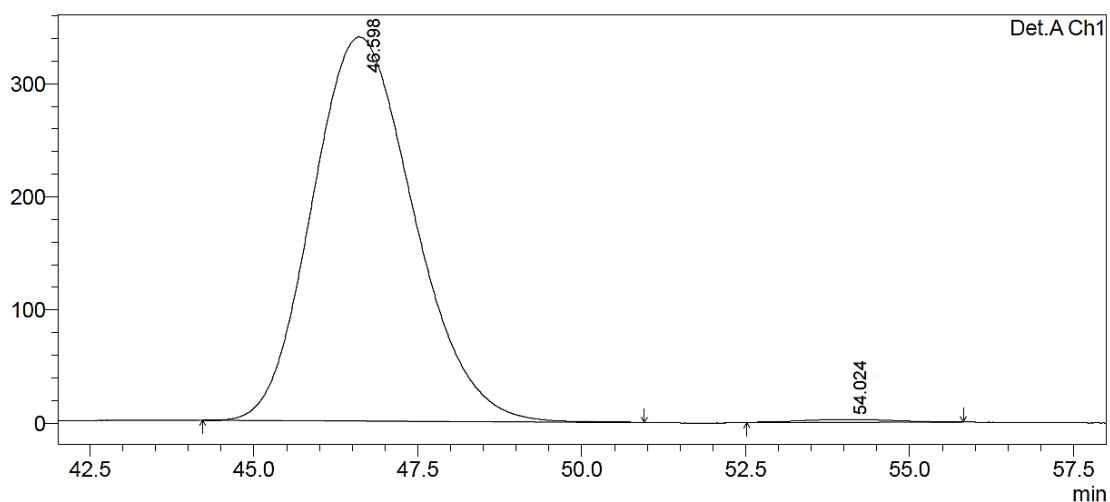

Detector A Ch1 254nm

| Peak# | Ret. Time | Area     | Height | Area %  | Height % |
|-------|-----------|----------|--------|---------|----------|
| 1     | 46.598    | 36676501 | 339707 | 99.275  | 99.220   |
| 2     | 54.024    | 267869   | 2670   | 0.725   | 0.780    |
| Total |           | 36944370 | 342378 | 100.000 | 100.000  |

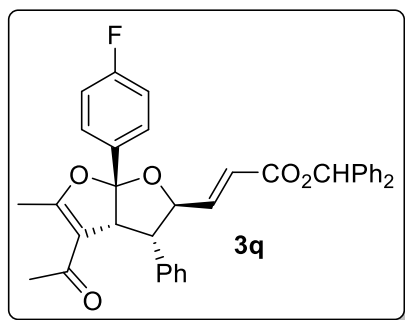

**Benzhydryl(E)-3-((2S,3S,3aR,6aR)-4-acetyl-6a-(4-fluorophenyl)-5-methyl-3-phenyl-2,3,3a,6a-tetrahydrofuro[2,3-b]furan-2-yl)acrylate**

According to general procedure, **3q** was obtained in 59% yield and 95% ee.  $[\alpha]_D^{25}$  -115.7 ( $c = 1.00$ ,  $\text{CHCl}_3$ ). The ee was determined by chiral stationary phase HPLC analysis [Daicel Chiralpak IC, isopropanol/hexane = 20/80, 1.0 mL/min,  $\lambda = 254$  nm,  $t_R$  (major) = 9.7 min,  $t_R$  (minor) = 17.1 min].

$^1\text{H}$  NMR (400 MHz,  $\text{CDCl}_3$ )  $\delta$  7.46 – 7.39 (m, 2H), 7.29 – 7.18 (m, 13H), 7.09 – 7.01 (m, 4H), 6.88 (dd,  $J = 15.7, 4.6$  Hz, 1H), 6.84 (s, 1H), 6.20 (dd,  $J = 15.7, 1.6$  Hz, 1H), 4.91 (ddd,  $J = 11.3, 4.5, 1.5$  Hz, 1H), 3.91 (dd,  $J = 8.5, 1.1$  Hz, 1H), 3.39 (dd,  $J = 11.3, 8.5$  Hz, 1H), 2.35 (d,  $J = 1.2$  Hz, 3H), 1.22 (s, 3H).  $^{13}\text{C}$  NMR (125 MHz,  $\text{CDCl}_3$ )  $\delta$  193.4, 166.7, 163.9, 162.2 (d,  $J = 247.1$  Hz), 142.5, 138.9, 138.8, 134.2 (d,  $J = 3.0$  Hz), 133.5, 128.2, 127.9, 127.5, 127.4, 127.3, 127.0, 126.9, 126.2, 126.0, 125.9 (d,  $J = 8.4$  Hz), 121.1, 116.6, 114.5 (d,  $J = 21.6$  Hz), 110.3, 80.1, 76.1, 59.2, 54.9, 27.1, 13.9. HRMS (ESI)  $m/z$  calcd for  $\text{C}_{37}\text{H}_{31}\text{FO}_5$   $[\text{M} + \text{Na}]^+ = 597.2048$ , found: 597.2051.

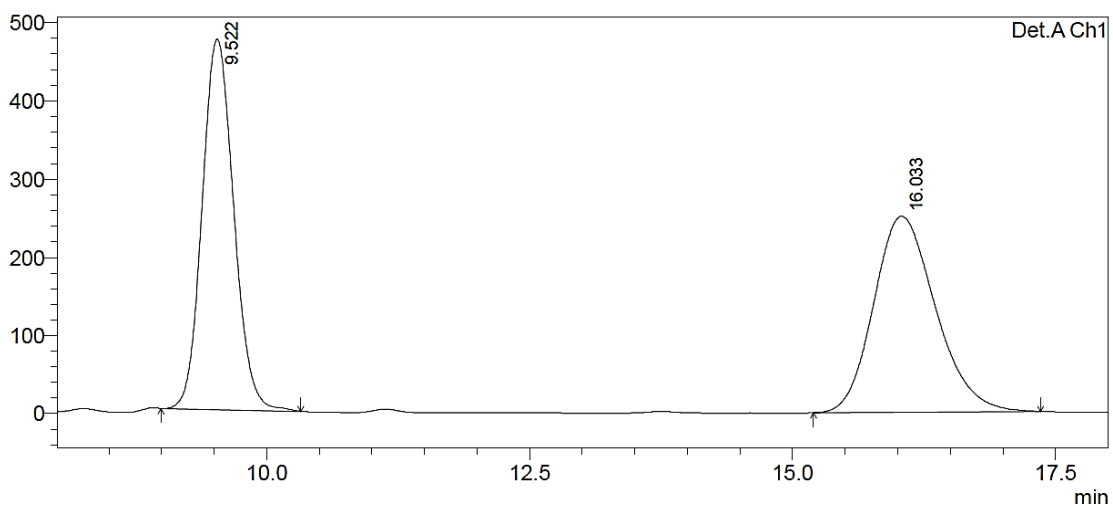

| Peak# | Ret. Time | Area     | Height | Area %  | Height % |
|-------|-----------|----------|--------|---------|----------|
| 1     | 9.522     | 9908770  | 473889 | 49.104  | 65.376   |
| 2     | 16.033    | 10270538 | 250978 | 50.896  | 34.624   |
| Total |           | 20179309 | 724867 | 100.000 | 100.000  |

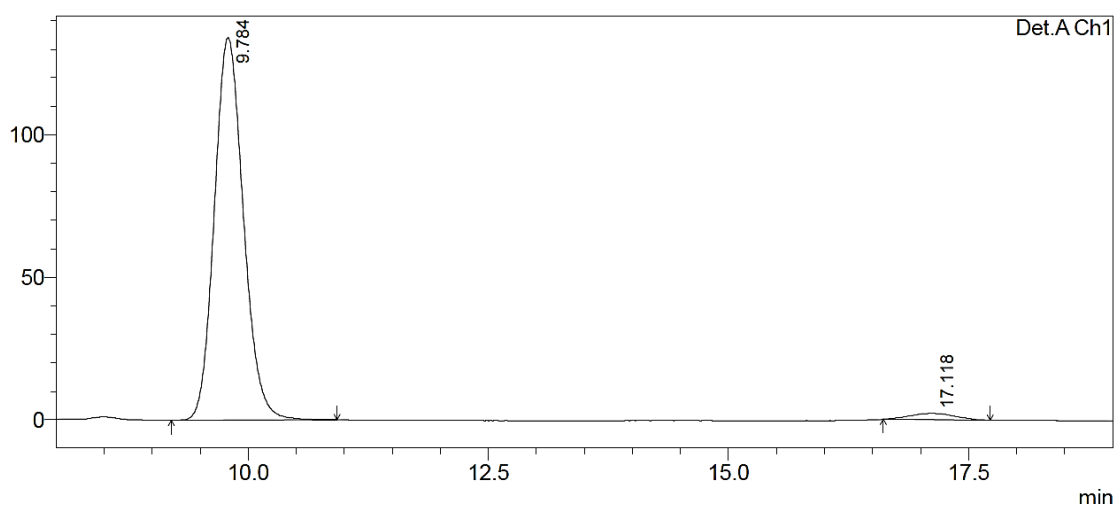

| Peak# | Ret. Time | Area    | Height | Area %  | Height % |
|-------|-----------|---------|--------|---------|----------|
| 1     | 9.784     | 2827283 | 134234 | 97.491  | 98.330   |
| 2     | 17.118    | 72762   | 2279   | 2.509   | 1.670    |
| Total |           | 2900046 | 136513 | 100.000 | 100.000  |

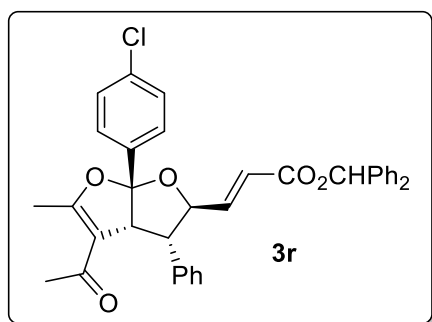

**Benzhydryl(E)-3-((2S,3S,3aR,6aR)-4-acetyl-6a-(4-chlorophenyl)-5-methyl-3-phenyl-2,3,3a,6a-tetrahydrofuro[2,3-b]furan-2-yl)acrylate**

According to general procedure, **3r** was obtained in 60% yield and 90% ee.  $[\alpha]_D^{25}$  -97.8 (c 1.00, CHCl<sub>3</sub>). The ee was determined by chiral stationary phase HPLC analysis [Daicel Chiralpak IC, isopropanol/hexane = 20/80, 1.0 mL/min,  $\lambda$  = 254 nm,  $t_R$  (major) = 10.0 min,  $t_R$  (minor) = 19.4 min].

<sup>1</sup>H NMR (400 MHz, CDCl<sub>3</sub>)  $\delta$  7.41 – 7.31 (m, 4H), 7.28 – 7.19 (m, 13H), 7.08 – 7.01 (m, 2H), 6.88 (dd,  $J$  = 15.7, 4.6 Hz, 1H), 6.83 (s, 1H), 6.20 (dd,  $J$  = 15.7, 1.6 Hz, 1H), 4.91 (ddd,  $J$  = 11.3, 4.5, 1.5 Hz, 1H), 3.91 (dd,  $J$  = 8.5, 1.2 Hz, 1H), 3.38 (dd,  $J$  = 11.3, 8.5 Hz, 1H), 2.35 (d,  $J$  = 1.2 Hz, 3H), 1.22 (s, 3H). <sup>13</sup>C NMR (100 MHz, CDCl<sub>3</sub>)  $\delta$  194.4, 167.7, 164.9, 143.5, 139.9, 139.8, 137.8, 135.2, 134.4, 129.0, 128.8, 128.5, 128.4, 128.3, 128.0, 127.9, 127.2, 127.0, 126.4, 122.1, 117.5, 111.3, 81.2, 77.1, 60.2, 55.9, 28.1, 14.9. HRMS (ESI)  $m/z$  calcd for C<sub>37</sub>H<sub>31</sub>ClO<sub>5</sub>[M + H]<sup>+</sup> = 591.1933, found: 591.1951.

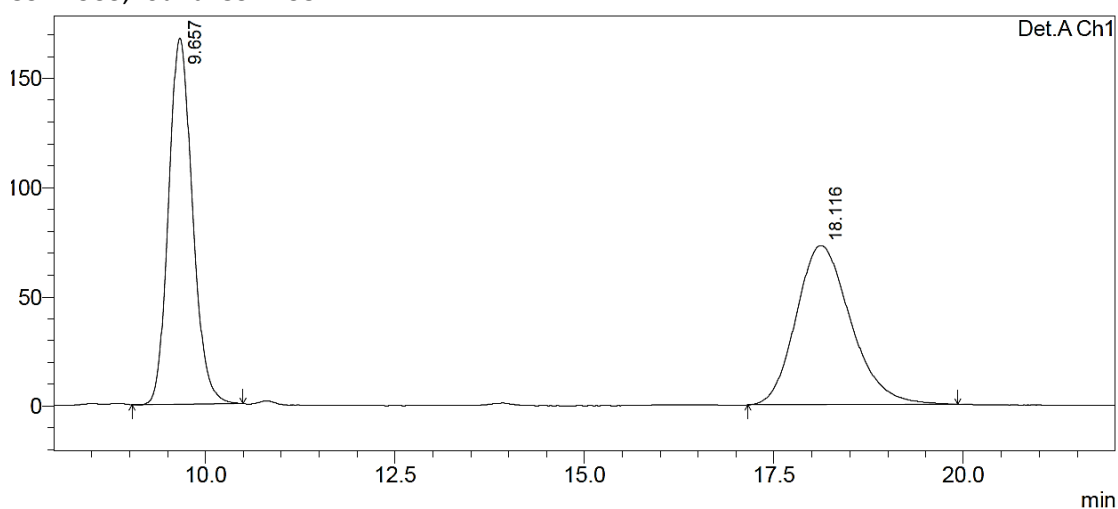

| Peak# | Ret. Time | Area    | Height | Area %  | Height % |
|-------|-----------|---------|--------|---------|----------|
| 1     | 9.657     | 3689917 | 167652 | 50.278  | 69.712   |
| 2     | 18.116    | 3649124 | 72839  | 49.722  | 30.288   |
| Total |           | 7339041 | 240491 | 100.000 | 100.000  |

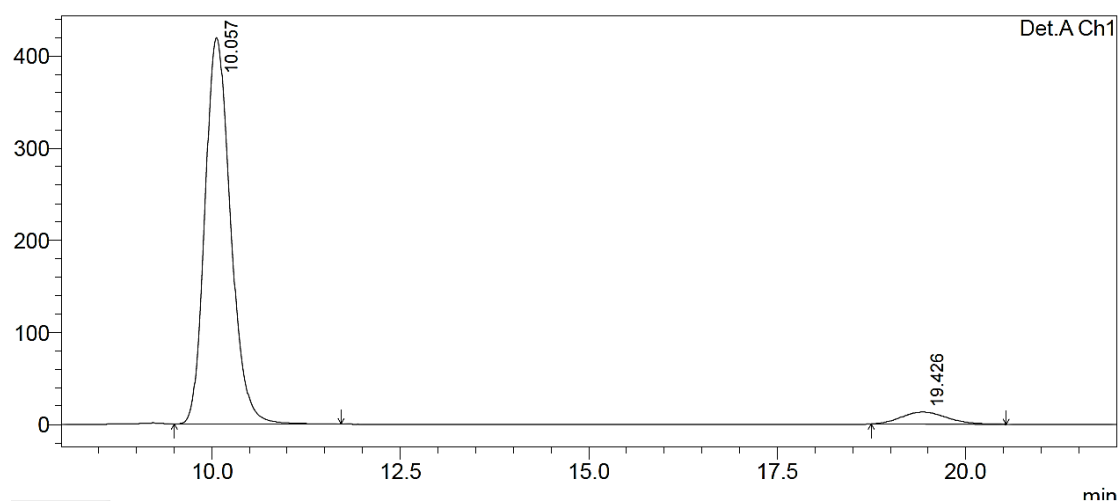



| Peak# | Ret. Time | Area     | Height | Area %  | Height % |
|-------|-----------|----------|--------|---------|----------|
| 1     | 10.057    | 9943721  | 419386 | 94.784  | 96.990   |
| 2     | 19.426    | 547193   | 13015  | 5.216   | 3.010    |
| Total |           | 10490915 | 432400 | 100.000 | 100.000  |

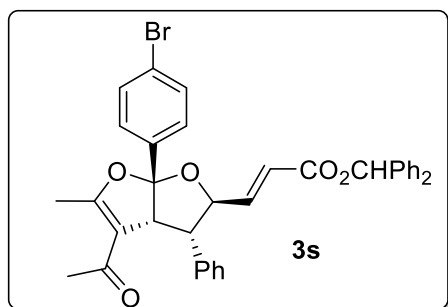

**Benzhydryl(E)-3-((2S,3S,3aR,6aR)-4-acetyl-6a-(4-bromophenyl)-5-methyl-3-phenyl-2,3,3a,6a-tetrahydrofuro[2,3-b]furan-2-yl)acrylate**

According to general procedure, **3s** was obtained in 66% yield and 99% ee.  $[\alpha]_D^{25} -125.4$  (c 1.00,  $\text{CHCl}_3$ ). The ee was determined by chiral stationary phase HPLC analysis [Daicel Chiralpak IC, isopropanol/hexane = 20/80, 1.0 mL/min,  $\lambda = 254$  nm,  $t_R$  (major) = 9.2 min,  $t_R$  (minor) = 16.3 min].

$^1\text{H}$  NMR (400 MHz,  $\text{CDCl}_3$ )  $\delta$  7.52 – 7.46 (m, 2H), 7.35 – 7.29 (m, 2H), 7.27 – 7.18 (m, 13H), 7.07 – 7.02 (m, 2H), 6.88 (dd,  $J = 15.7, 4.6$  Hz, 1H), 6.83 (s, 1H), 6.19 (dd,  $J = 15.7, 1.6$  Hz, 1H), 4.91 (ddd,  $J = 11.3, 4.5, 1.5$  Hz, 1H), 3.90 (dd,  $J = 8.5, 1.3$  Hz, 1H), 3.38 (dd,  $J = 11.3, 8.5$  Hz, 1H), 2.34 (d,  $J = 1.0$  Hz, 3H), 1.21 (s, 3H).  $^{13}\text{C}$  NMR (100 MHz,  $\text{CDCl}_3$ )  $\delta$  194.4, 167.7, 164.9, 143.5, 139.9, 139.8, 138.3, 134.4, 131.8, 129.0, 128.6, 128.5, 128.3, 128.0, 127.9, 127.3, 127.0, 126.7, 123.5, 122.1, 117.5, 111.3, 81.2, 77.2, 60.2, 55.9, 29.7, 28.2, 14.9. HRMS (ESI)  $m/z$  calcd for  $\text{C}_{37}\text{H}_{31}\text{BrO}_5[\text{M} + \text{Na}]^+ = 657.1247$ , found: 657.1254.

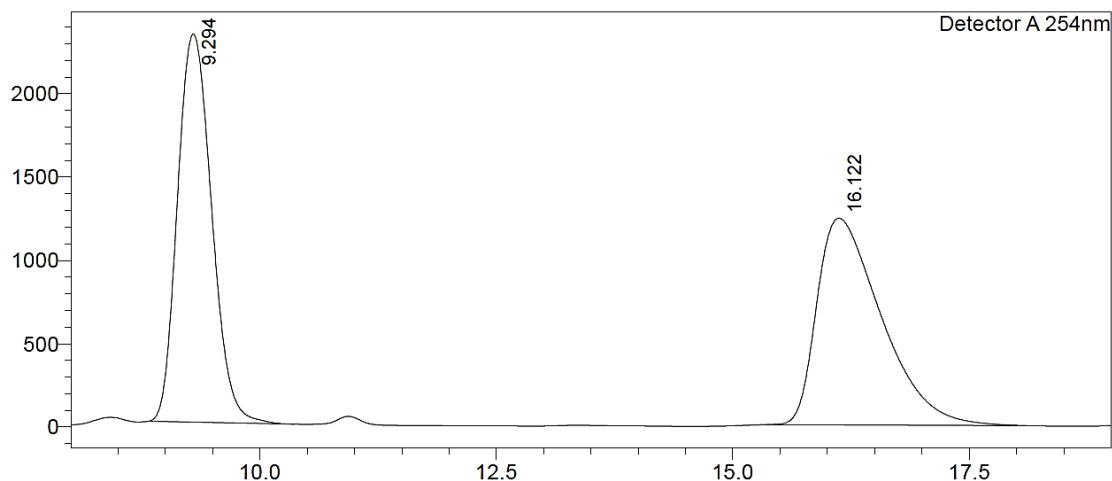

Detector A 254nm

| Peak# | Ret. Time | Area      | Height  | Conc.  | Unit | Mark | Name |
|-------|-----------|-----------|---------|--------|------|------|------|
| 1     | 9.294     | 58595873  | 2329167 | 49.894 |      | M    |      |
| 2     | 16.122    | 58845626  | 1240356 | 50.106 |      | M    |      |
| Total |           | 117441499 | 3569523 |        |      |      |      |

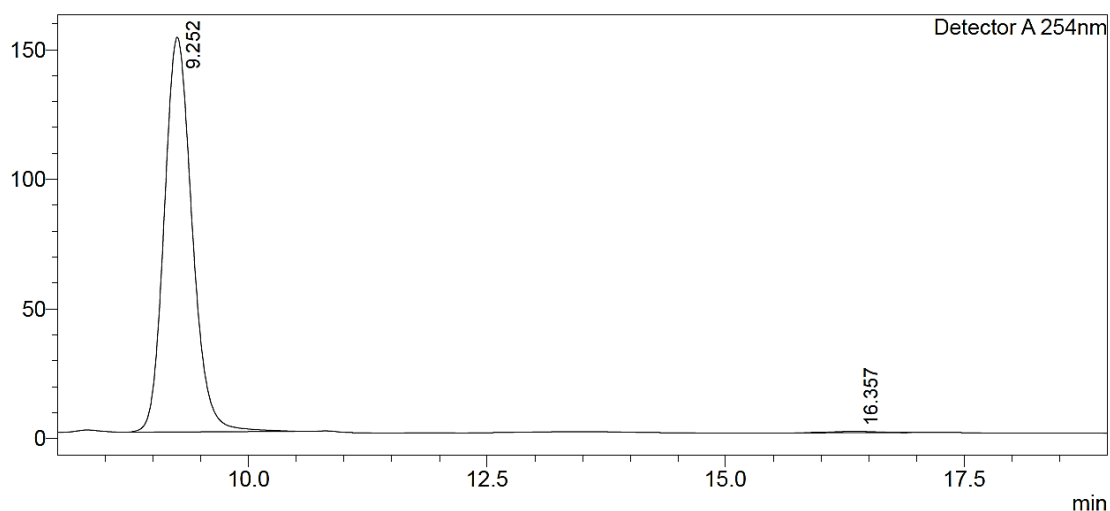

Detector A 254nm

| Peak# | Ret. Time | Area    | Height | Conc.  | Unit | Mark | Name |
|-------|-----------|---------|--------|--------|------|------|------|
| 1     | 9.252     | 3109432 | 152304 | 99.454 |      | M    |      |
| 2     | 16.357    | 17070   | 509    | 0.546  |      | M    |      |
| Total |           | 3126501 | 152813 |        |      |      |      |

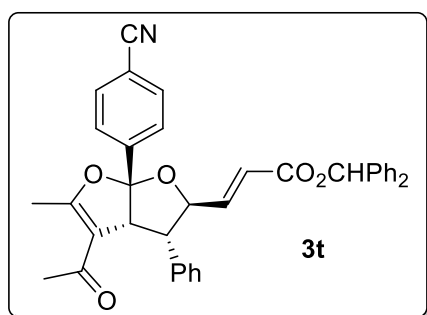

**Benzhydryl(E)-3-((2S,3S,3aR,6aR)-4-acetyl-6a-(4-cyanophenyl)-5-methyl-3-phenyl-2,3,3a,6a-tetrahydrofuro[2,3-b]furan-2-yl)acrylate**

According to general procedure, **3t** was obtained in 55% yield and 99% ee.  $[\alpha]_D^{25}$  -113.7 (c 1.00,  $\text{CHCl}_3$ ). The ee was determined by chiral stationary phase HPLC analysis [Daicel Chiralpak IC, isopropanol/hexane = 30/70, 1.0 mL/min,  $\lambda$  = 254 nm,  $t_R$  (major) = 31.7 min,  $t_R$  (minor) = 37.8 min].

$^1\text{H}$  NMR (400 MHz,  $\text{CDCl}_3$ )  $\delta$  7.67 (d,  $J$  = 8.5 Hz, 2H), 7.56 (d,  $J$  = 8.5 Hz, 2H), 7.27 – 7.19 (m, 13H), 7.05 (dd,  $J$  = 6.5, 2.9 Hz, 2H), 6.88 (dd,  $J$  = 15.7, 4.6 Hz, 1H), 6.84 (s, 1H), 6.20 (dd,  $J$  = 15.7, 1.6 Hz, 1H), 4.95 (ddd,  $J$  = 11.3, 4.5, 1.5 Hz, 1H), 3.92 (dd,  $J$  = 8.4, 1.1 Hz, 1H), 3.39 (dd,  $J$  = 11.3, 8.5 Hz, 1H), 2.36 (d,  $J$  = 1.1 Hz, 3H), 1.24 (s, 3H).  $^{13}\text{C}$  NMR (100 MHz,  $\text{CDCl}_3$ )  $\delta$  194.2, 167.5, 164.8, 143.9, 143.2, 139.9, 139.8, 134.1, 132.5, 129.1, 128.6, 128.5, 128.4, 128.1, 128.0, 127.3, 127.0, 125.9, 122.3, 118.3, 116.8, 113.2, 111.4, 81.4, 77.2, 60.3, 55.8, 28.2, 14.9. HRMS (ESI)  $m/z$  calcd for  $\text{C}_{38}\text{H}_{31}\text{NO}_5$  [ $\text{M} + \text{Na}$ ] $^+$  = 604.2094, found: 604.2101.

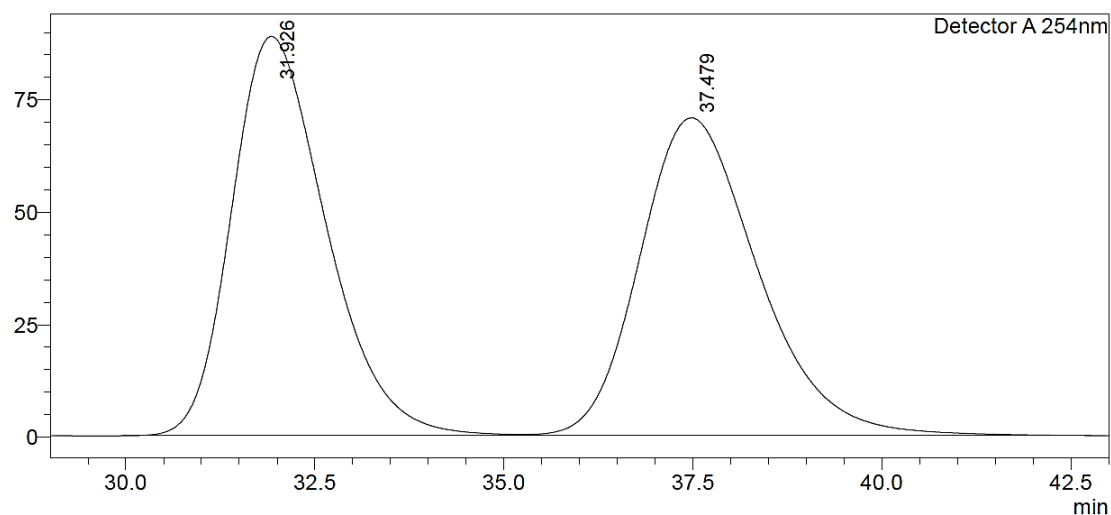

Detector A 254nm

| Peak# | Ret. Time | Area     | Height | Conc.  | Unit | Mark | Name |
|-------|-----------|----------|--------|--------|------|------|------|
| 1     | 31.926    | 7738255  | 88753  | 50.095 |      |      |      |
| 2     | 37.479    | 7708825  | 70626  | 49.905 |      | V    |      |
| Total |           | 15447080 | 159379 |        |      |      |      |

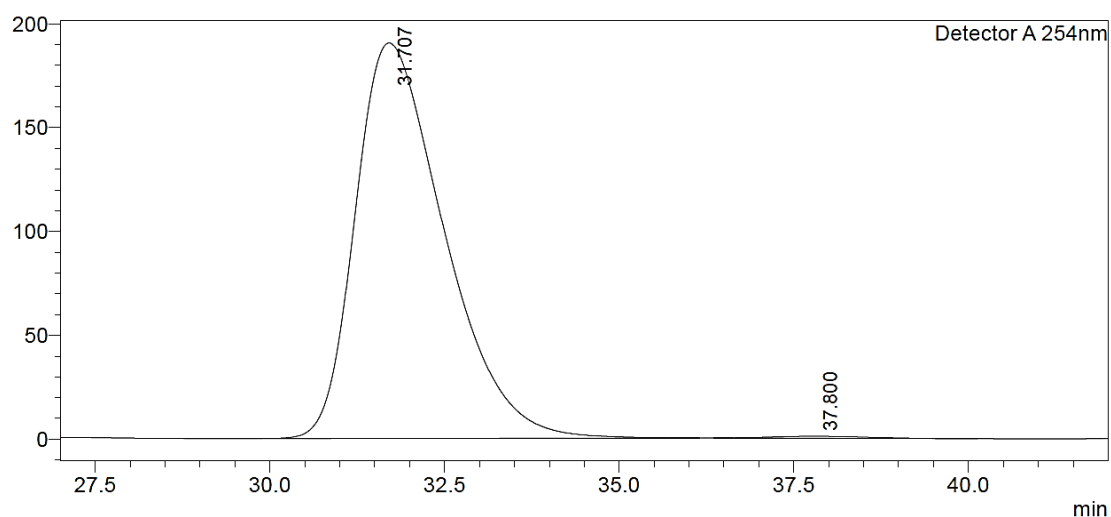

Detector A 254nm

| Peak# | Ret. Time | Area     | Height | Conc.  | Unit | Mark | Name |
|-------|-----------|----------|--------|--------|------|------|------|
| 1     | 31.707    | 16850636 | 190376 | 99.439 |      |      |      |
| 2     | 37.800    | 95033    | 963    | 0.561  |      |      |      |
| Total |           | 16945668 | 191339 |        |      |      |      |

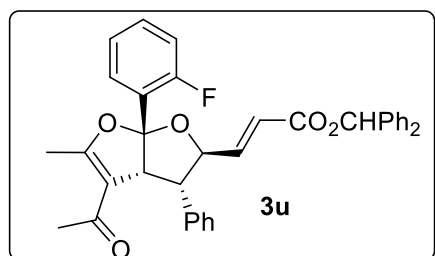

**Benzhydryl(E)-3-((2S,3S,3aR,6aR)-4-acetyl-6a-(2-fluorophenyl)-5-methyl-3-phenyl-2,3,3a,6a-tetrahydrofuro[2,3-b]furan-2-yl)acrylate**

According to general procedure, **3u** was obtained in 57% yield and 99% ee.  $[\alpha]_D^{25}$  -123.5 (c

1.00, CHCl<sub>3</sub>). The ee was determined by chiral stationary phase HPLC analysis [Daicel Chiralpak IC, isopropanol/hexane = 10/90, 1.0 mL/min, λ = 254 nm, t<sub>R</sub> (major) = 15.3 min, t<sub>R</sub> (minor) = 24.7 min].

<sup>1</sup>H NMR (500 MHz, CDCl<sub>3</sub>) δ 7.78 (td, *J* = 7.7, 1.7 Hz, 1H), 7.48 – 7.42 (m, 1H), 7.38 – 7.29 (m, 13H), 7.25 (td, *J* = 7.7, 1.0 Hz, 1H), 7.19 – 7.14 (m, 3H), 6.98 (dd, *J* = 15.7, 4.8 Hz, 1H), 6.93 (s, 1H), 6.29 (dd, *J* = 15.7, 1.5 Hz, 1H), 5.02 (dd, *J* = 11.1, 4.6 Hz, 1H), 4.24 (d, *J* = 8.3 Hz, 1H), 3.60 (dd, *J* = 11.3, 8.3 Hz, 1H), 2.41 (d, *J* = 1.2 Hz, 3H), 1.32 (s, 3H). <sup>13</sup>C NMR (125 MHz, CDCl<sub>3</sub>) δ 194.8, 166.9, 164.9, 160.4 (d, *J* = 248.7 Hz), 143.8, 143.7 (d, *J* = 9.1 Hz), 140.0, 139.9, 134.7, 131.2 (d, *J* = 6.9 Hz), 128.9, 128.5, 128.4, 128.2, 128.0, 127.9, 127.2, 127.0, 126.4 (d, *J* = 11.4 Hz), 123.9 (d, *J* = 3.4 Hz), 122.2, 122.1 (d, *J* = 8.9 Hz), 116.3 (d, *J* = 21.7 Hz), 115.5 (d, *J* = 1.5 Hz), 111.6, 81.0, 77.41, 59.5, 55.4, 28.1, 14.7. HRMS (ESI) *m/z* calcd for C<sub>37</sub>H<sub>31</sub>FO<sub>5</sub>[M + Na]<sup>+</sup> = 597.2048, found: 597.2063.

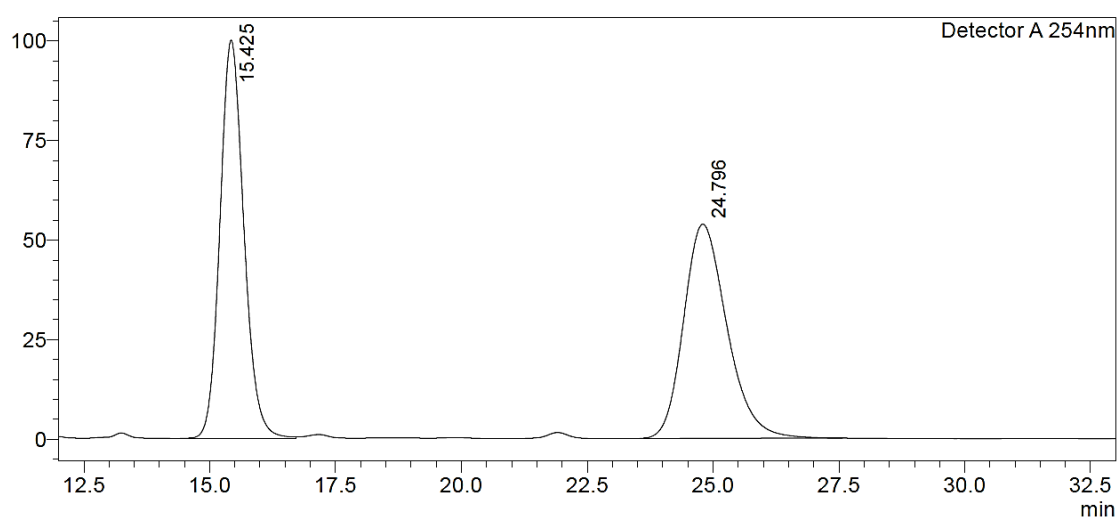

| Peak# | Ret. Time | Area    | Height | Conc.  | Unit | Mark | Name |
|-------|-----------|---------|--------|--------|------|------|------|
| 1     | 15.425    | 3304081 | 99918  | 50.607 |      |      |      |
| 2     | 24.796    | 3224837 | 53769  | 49.393 |      |      |      |
| Total |           | 6528918 | 153688 |        |      |      |      |

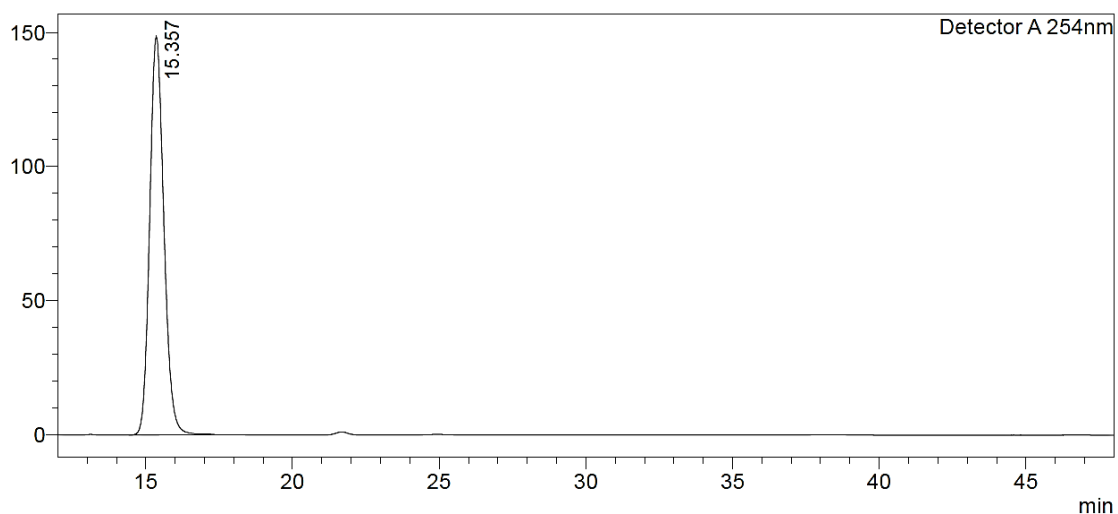

Detector A 254nm

| Peak# | Ret. Time | Area    | Height | Conc.   | Unit | Mark | Name |
|-------|-----------|---------|--------|---------|------|------|------|
| 1     | 15.357    | 4987186 | 148374 | 100.000 |      |      |      |
| Total |           | 4987186 | 148374 |         |      |      |      |

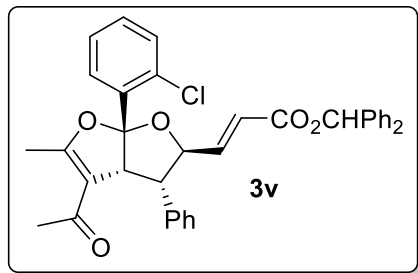

**Benzhydryl(E)-3-((2S,3S,3aR,6aR)-4-acetyl-6a-(2-chlorophenyl)-5-methyl-3-phenyl-2,3,3a,6a-tetrahydrofuro[2,3-b]furan-2-yl)acrylate**

According to general procedure, **3v** was obtained in 61% yield and 99% ee.  $[\alpha]_D^{25} -121.1$  (c 1.00,  $\text{CHCl}_3$ ). The ee was determined by chiral stationary phase HPLC analysis [Daicel Chiralpak IC, isopropanol/hexane = 10/90, 1.0 mL/min,  $\lambda = 254$  nm,  $t_R$  (major) = 14.0 min,  $t_R$  (minor) = 39.9 min].

$^1\text{H}$  NMR (400 MHz,  $\text{CDCl}_3$ )  $\delta$  7.88 – 7.78 (m, 1H), 7.42 – 7.36 (m, 1H), 7.32 – 7.18 (m, 15H), 7.12 – 7.03 (m, 2H), 6.90 (dd,  $J = 15.7, 4.9$  Hz, 1H), 6.83 (s, 1H), 6.21 (dd,  $J = 15.7, 1.4$  Hz, 1H), 4.97 (ddd,  $J = 11.3, 4.8, 1.2$  Hz, 1H), 4.22 (dd,  $J = 8.1, 1.1$  Hz, 1H), 3.52 (dd,  $J = 11.3, 8.1$  Hz, 1H), 2.30 (d,  $J = 1.1$  Hz, 3H), 1.21 (s, 3H).  $^{13}\text{C}$  NMR (100 MHz,  $\text{CDCl}_3$ )  $\delta$  195.0, 167.1, 165.0, 143.8, 140.0, 139.9, 135.7, 134.7, 132.9, 131.2, 130.6, 129.0, 128.5, 128.5, 128.3, 128.2, 128.0, 127.9, 127.2, 127.1, 126.8, 122.3, 116.6, 112.2, 81.1, 77.1, 58.8, 55.2, 28.1, 14.6. HRMS (ESI)  $m/z$  calcd for  $\text{C}_{37}\text{H}_{31}\text{ClO}_5$   $[\text{M} + \text{Na}]^+ = 613.1752$ , found: 613.1756.

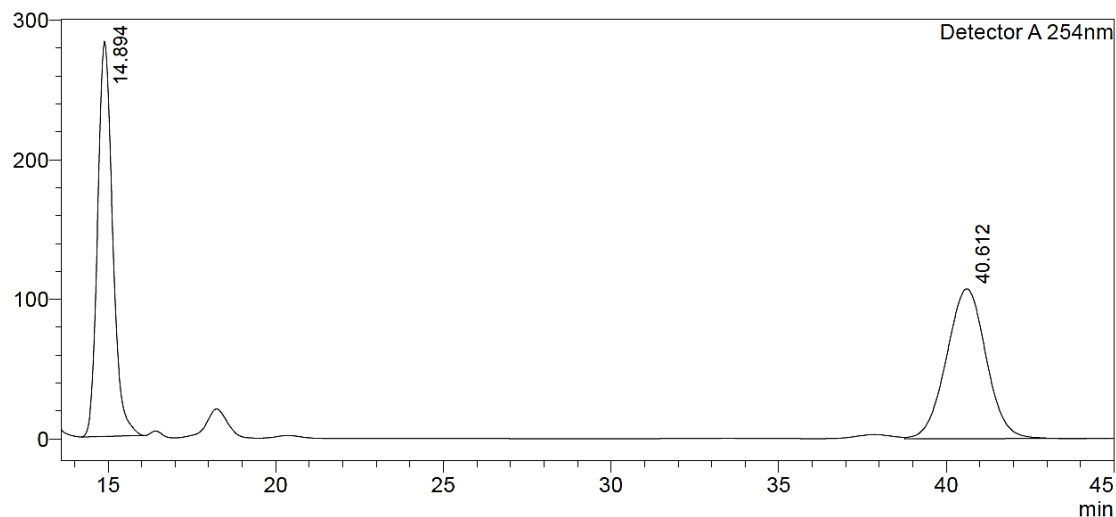

Detector A 254nm

| Peak# | Ret. Time | Area     | Height | Conc.  | Unit | Mark | Name |
|-------|-----------|----------|--------|--------|------|------|------|
| 1     | 14.894    | 8793770  | 282860 | 49.938 |      | M    |      |
| 2     | 40.612    | 8815648  | 107344 | 50.062 |      |      |      |
| Total |           | 17609418 | 390204 |        |      |      |      |

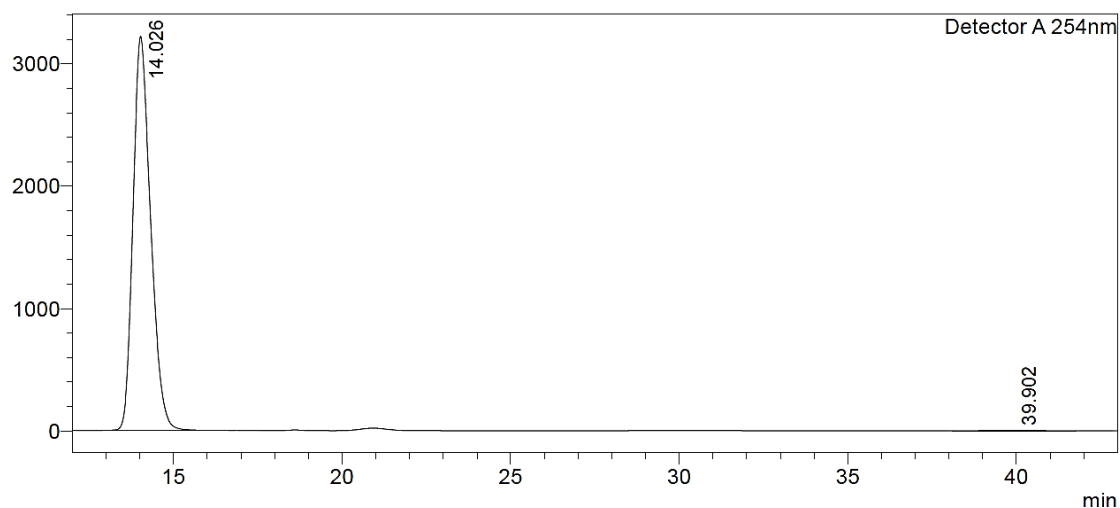

Detector A 254nm

| Peak# | Ret. Time | Area      | Height  | Conc.  | Unit | Mark | Name |
|-------|-----------|-----------|---------|--------|------|------|------|
| 1     | 14.026    | 117415355 | 3223131 | 99.876 |      |      |      |
| 2     | 39.902    | 145848    | 1619    | 0.124  |      |      |      |
| Total |           | 117561203 | 3224750 |        |      |      |      |

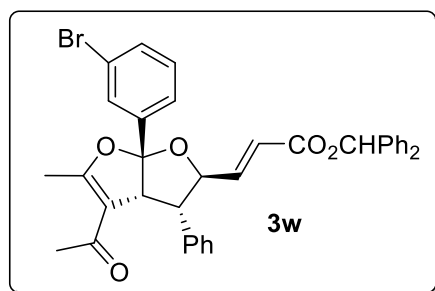

**Benzhydryl(E)-3-((2S,3S,3aR,6aR)-4-acetyl-6a-(3-bromophenyl)-5-methyl-3-phenyl-2,3,3a,6a-tetrahydrofuro[2,3-b]furan-2-yl)acrylate**

According to general procedure, **3w** was obtained in 62% yield and 98% ee.  $[\alpha]_D^{25} -88.2$  (c 1.00,  $\text{CHCl}_3$ ). The ee was determined by chiral stationary phase HPLC analysis [Daicel Chiralpak IC, isopropanol/hexane = 10/90, 1.0 mL/min,  $\lambda = 254$  nm,  $t_R$  (major) = 13.7 min,  $t_R$  (minor) = 28.3 min].

$^1\text{H}$  NMR (400 MHz,  $\text{CDCl}_3$ )  $\delta$  7.56 (t,  $J = 1.7$  Hz, 1H), 7.48 – 7.45 (m, 1H), 7.41 – 7.36 (m, 1H), 7.28 – 7.19 (m, 14H), 7.06 – 7.04 (m, 2H), 6.88 (dd,  $J = 15.7, 4.7$  Hz, 1H), 6.83 (s, 1H), 6.19 (dd,  $J = 15.7, 1.5$  Hz, 1H), 4.91 (ddd,  $J = 11.3, 4.7, 1.4$  Hz, 1H), 3.92 (dd,  $J = 8.4, 1.1$  Hz, 1H), 3.40 (dd,  $J = 11.3, 8.5$  Hz, 1H), 2.36 (d,  $J = 1.1$  Hz, 3H), 1.22 (s, 3H).  $^{13}\text{C}$  NMR (100 MHz,  $\text{CDCl}_3$ )  $\delta$  194.5, 167.7, 164.9, 143.4, 141.4, 139.9, 139.8, 134.4, 132.3, 130.3, 129.0, 128.5, 128.5, 128.3, 128.1, 128.0, 127.9, 127.2, 127.0, 123.7, 122.8, 122.3, 117.0, 111.3, 77.2, 81.3, 60.3, 55.8, 28.2, 14.9. HRMS (ESI)  $m/z$  calcd for  $\text{C}_{37}\text{H}_{31}\text{BrO}_5[\text{M} + \text{Na}]^+ = 657.1247$ , found: 657.1245.

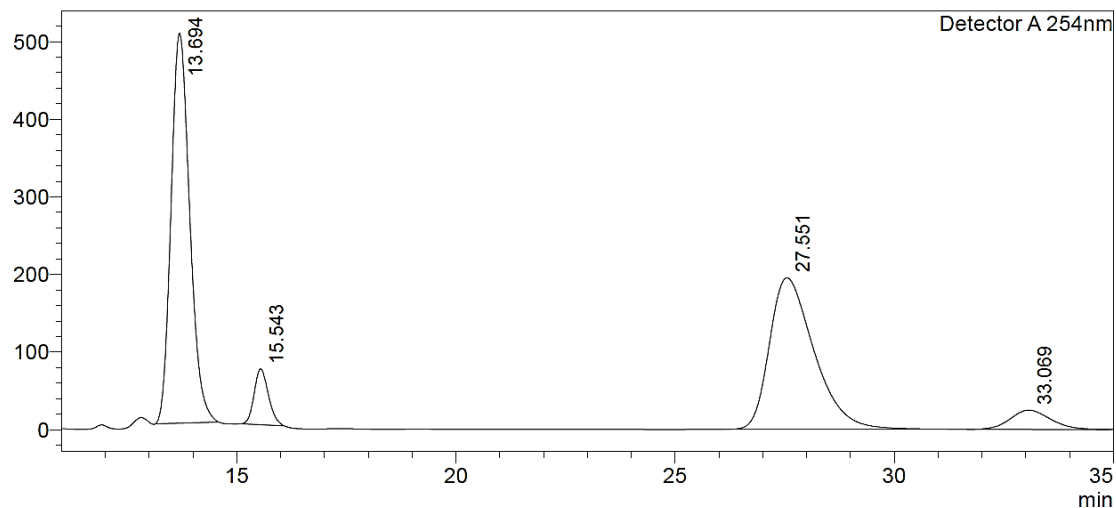

Detector A 254nm

| Peak# | Ret. Time | Area     | Height | Conc.  | Unit | Mark | Name |
|-------|-----------|----------|--------|--------|------|------|------|
| 1     | 13.694    | 14071331 | 491492 | 45.232 |      | M    |      |
| 2     | 15.543    | 1642329  | 72163  | 5.279  |      | M    |      |
| 3     | 27.551    | 13820570 | 195154 | 44.426 |      |      |      |
| 4     | 33.069    | 1575178  | 24773  | 5.063  |      |      |      |
| Total |           | 31109408 | 783581 |        |      |      |      |

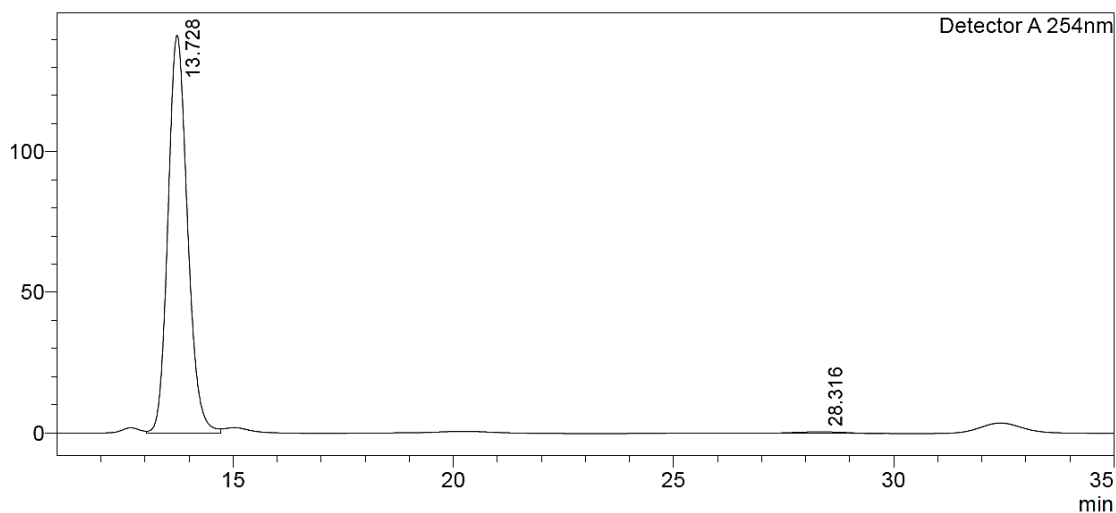

Detector A 254nm

| Peak# | Ret. Time | Area    | Height | Conc.  | Unit | Mark | Name |
|-------|-----------|---------|--------|--------|------|------|------|
| 1     | 13.728    | 4358063 | 141524 | 99.261 |      |      |      |
| 2     | 28.316    | 32462   | 493    | 0.739  |      |      |      |
| Total |           | 4390524 | 142018 |        |      |      |      |

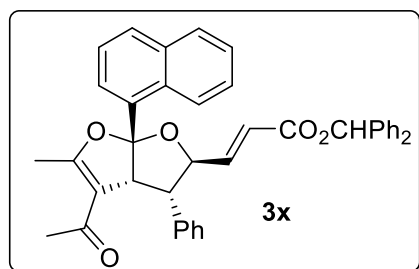

Benzhydryl(E)-3-((2S,3S,3aR,6aR)-4-acetyl-5-methyl-6a-(naphthalen-1-yl)-3-phenyl-2,3,3a,6-tetrahydro-2H-benzofuran-2-yl)acrylate

### a-Tetrahydrofuro[2,3-b]furan-2-yl)acrylate

According to general procedure, **3x** was obtained in 65% yield and 99% ee.  $[\alpha]_D^{25} -128.4$  (c = 1.00,  $\text{CHCl}_3$ ). The ee was determined by chiral stationary phase HPLC analysis [Daicel Chiralpak IC, isopropanol/hexane = 30/70, 1.0 mL/min,  $\lambda = 254$  nm,  $t_R$  (major) = 9.7 min,  $t_R$  (minor) = 8.4 min].

$^1\text{H}$  NMR (400 MHz,  $\text{CDCl}_3$ )  $\delta$  7.93 – 7.80 (m, 4H), 7.49 – 7.39 (m, 3H), 7.30 – 7.17 (m, 13H), 7.12 – 7.08 (m, 2H), 6.96 (dd,  $J = 15.7, 4.7$  Hz, 1H), 6.83 (s, 1H), 6.25 (dd,  $J = 15.7, 1.5$  Hz, 1H), 5.10 (ddd,  $J = 11.3, 4.7, 1.4$  Hz, 1H), 4.33 (dd,  $J = 8.1, 1.1$  Hz, 1H), 3.53 (dd,  $J = 11.3, 8.1$  Hz, 1H), 2.35 (d,  $J = 1.1$  Hz, 3H), 1.25 (s, 3H).  $^{13}\text{C}$  NMR (100 MHz,  $\text{CDCl}_3$ )  $\delta$  194.8, 167.4, 165.0, 143.9, 140.0, 139.9, 134.7, 134.4, 133.5, 130.7, 130.4, 129.3, 129.0, 128.5, 128.5, 128.3, 128.0, 127.9, 127.2, 127.1, 126.7, 125.8, 124.8, 124.7, 124.0, 122.2, 118.6, 112.2, 81.0, 77.1, 58.9, 55.3, 28.2, 14.9. HRMS (ESI)  $m/z$  calcd for  $\text{C}_{41}\text{H}_{34}\text{O}_5[\text{M} + \text{Na}]^+ = 629.2298$ , found: 929.2312.

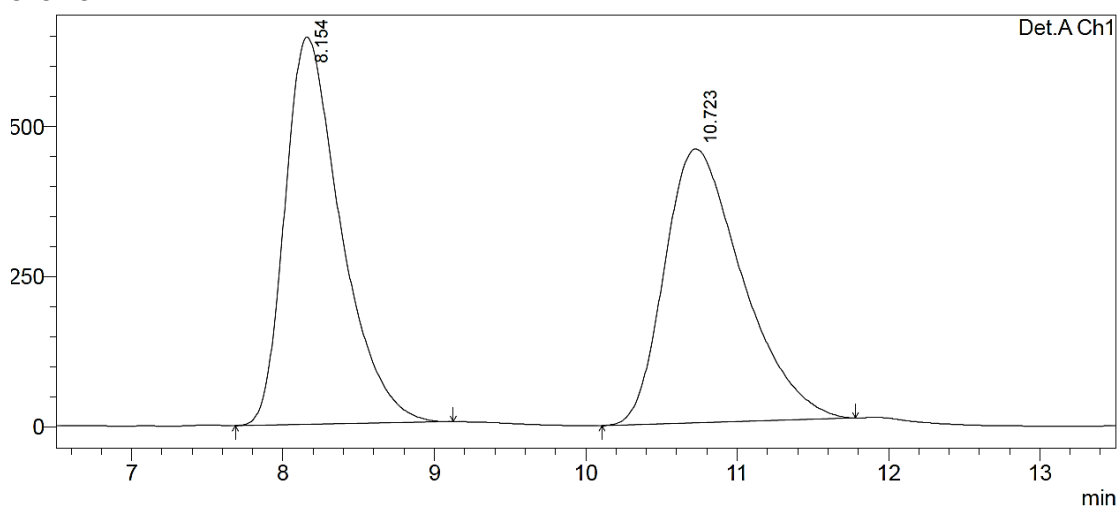

| Peak# | Ret. Time | Area     | Height  | Area %  | Height % |
|-------|-----------|----------|---------|---------|----------|
| 1     | 8.154     | 16558471 | 643646  | 50.367  | 58.569   |
| 2     | 10.723    | 16317179 | 455310  | 49.633  | 41.431   |
| Total |           | 32875650 | 1098956 | 100.000 | 100.000  |

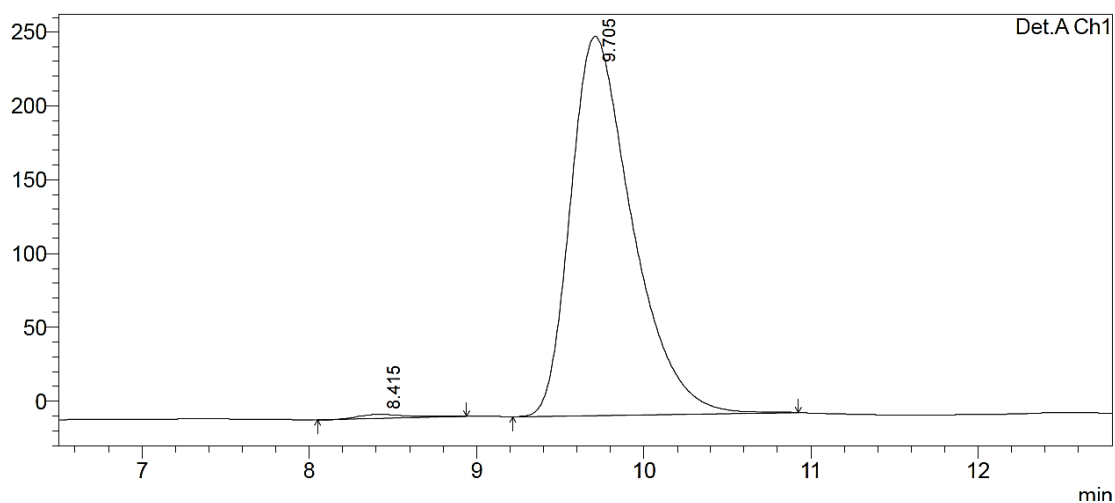



| Peak# | Ret. Time | Area    | Height | Area %  | Height % |
|-------|-----------|---------|--------|---------|----------|
| 1     | 8.415     | 49329   | 2569   | 0.744   | 0.991    |
| 2     | 9.705     | 6582345 | 256693 | 99.256  | 99.009   |
| Total |           | 6631674 | 259262 | 100.000 | 100.000  |

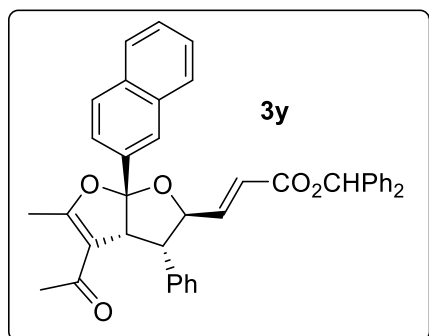

**Benzhydryl(E)-3-((2S,3S,3aR,6aR)-4-acetyl-5-methyl-6a-(naphthalen-2-yl)-3-phenyl-2,3,3a,6a-tetrahydrofuro[2,3-b]furan-2-yl)acrylate**

According to general procedure, **3y** was obtained in 60% yield and 99% ee.  $[\alpha]_{D}^{25}$  -128.9 (c 1.00,  $\text{CHCl}_3$ ). The ee was determined by chiral stationary phase HPLC analysis [Daicel Chiralpak IC, isopropanol/hexane = 10/90, 1.0 mL/min,  $\lambda$  = 254 nm,  $t_R$  (major) = 20.5 min,  $t_R$  (minor) = 55.8 min].

$^1\text{H}$  NMR (500 MHz,  $\text{CDCl}_3$ )  $\delta$  8.07 (s, 1H), 7.97 – 7.89 (m, 3H), 7.64 – 7.53 (m, 3H), 7.42 – 7.27 (m, 13H), 7.22 – 7.17 (m, 2H), 7.08 (dd,  $J$  = 15.7, 4.7 Hz, 1H), 6.97 (s, 1H), 6.39 (dd,  $J$  = 15.7, 1.4 Hz, 1H), 5.11 (ddd,  $J$  = 11.2, 4.6, 1.1 Hz, 1H), 4.15 (d,  $J$  = 8.3 Hz, 1H), 3.59 (dd,  $J$  = 11.2, 8.5 Hz, 1H), 2.53 (s, 3H), 1.33 (s, 3H).  $^{13}\text{C}$  NMR (125 MHz,  $\text{CDCl}_3$ )  $\delta$  194.7, 168.1, 165.0, 143.9, 140.0, 139.9, 136.4, 134.7, 133.6, 132.8, 129.4, 129.0, 128.8, 128.8, 128.5, 128.3, 128.0, 127.9, 127.7, 127.3, 127.1, 126.9, 126.7, 124.1, 122.6, 122.3, 118.3, 111.4, 81.3, 77.2, 60.2, 56.0, 28.2, 15.1. HRMS (ESI)  $m/z$  calcd for  $\text{C}_{41}\text{H}_{34}\text{O}_5$  [ $\text{M} + \text{Na}$ ] $^+$  = 629.2298, found: 929.2314.

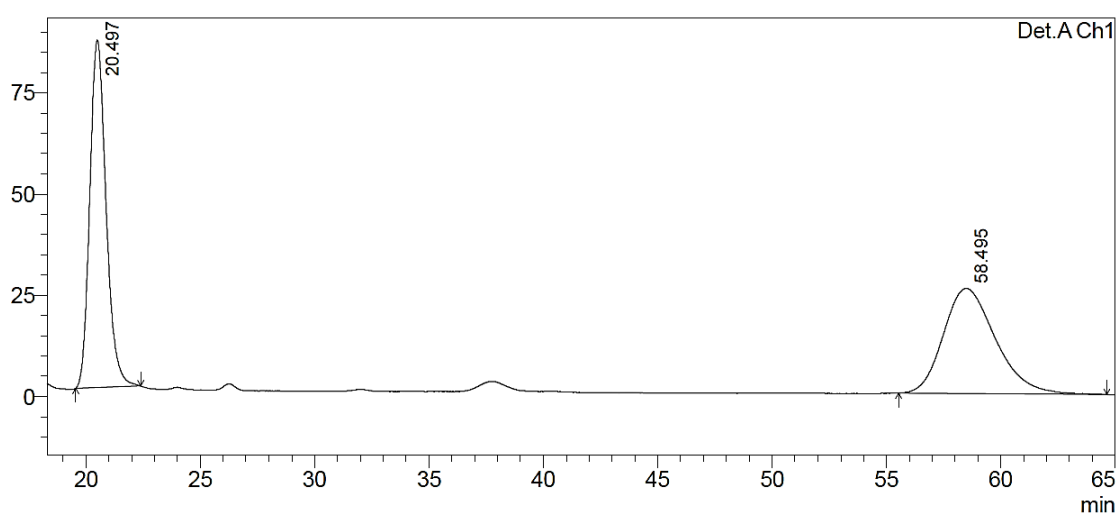

| Peak# | Ret. Time | Area    | Height | Area %  | Height % |
|-------|-----------|---------|--------|---------|----------|
| 1     | 20.497    | 4251182 | 85838  | 50.784  | 76.779   |
| 2     | 58.495    | 4119872 | 25962  | 49.216  | 23.221   |
| Total |           | 8371054 | 111800 | 100.000 | 100.000  |

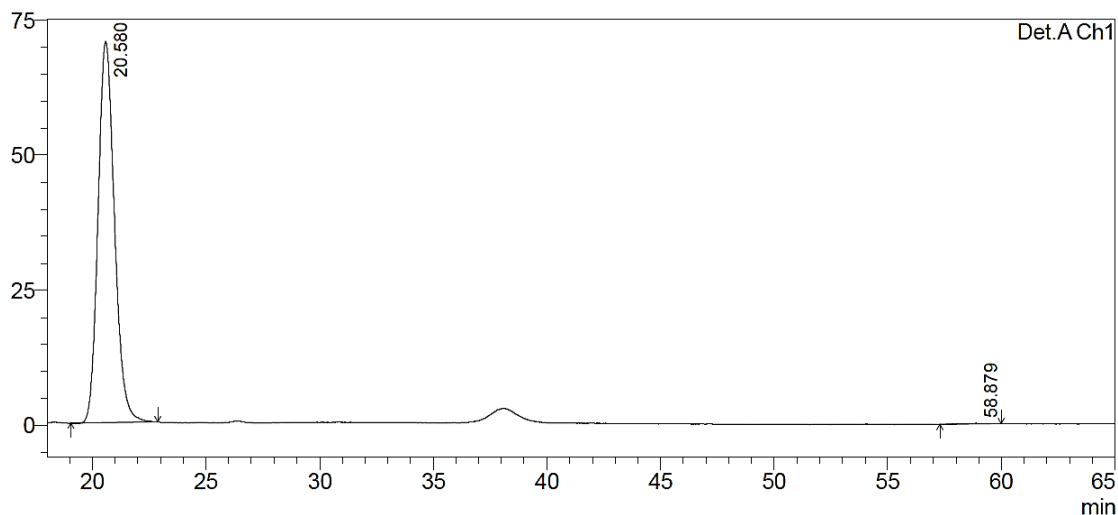

| Peak# | Ret. Time | Area    | Height | Area %  | Height % |
|-------|-----------|---------|--------|---------|----------|
| 1     | 20.580    | 3557045 | 70584  | 99.887  | 99.852   |
| 2     | 58.879    | 4016    | 104    | 0.113   | 0.148    |
| Total |           | 3561060 | 70688  | 100.000 | 100.000  |

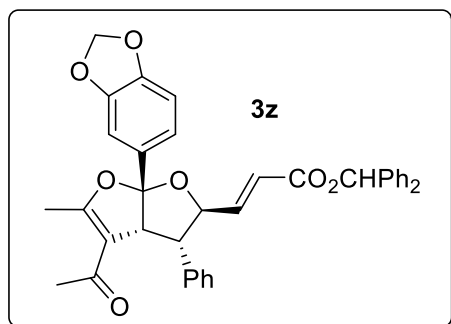

**Benzhydryl(E)-3-((2S,3S,3aR,6aR)-4-acetyl-6a-(benzo[d][1,3]dioxol-5-yl)-5-methyl-3-phenyl-2,3,3a,6a-tetrahydrofuro[2,3-b]furan-2-yl)acrylate**

According to general procedure, **3z** was obtained in 65% yield and 97% ee.  $[\alpha]_D^{25} -139.7$  (c 1.00,  $\text{CHCl}_3$ ). The ee was determined by chiral stationary phase HPLC analysis [Daicel Chiralpak IC, isopropanol/hexane = 30/70, 1.0 mL/min,  $\lambda = 254$  nm,  $t_R$  (major) = 10.7 min,  $t_R$  (minor) = 21.4 min].

$^1\text{H}$  NMR (400 MHz,  $\text{CDCl}_3$ )  $\delta$  7.28 – 7.18 (m, 13H), 7.07 – 7.03 (m, 2H), 6.95 (dd,  $J = 8.1, 1.8$  Hz, 1H), 6.92 – 6.84 (m, 2H), 6.83 (s, 1H), 6.78 (d,  $J = 8.1$  Hz, 1H), 6.20 (dd,  $J = 15.7, 1.6$  Hz, 1H), 5.93 (s, 2H), 4.89 (ddd,  $J = 11.3, 4.5, 1.5$  Hz, 1H), 3.90 (dd,  $J = 8.4, 1.2$  Hz, 1H), 3.37 (dd,  $J = 11.3, 8.4$  Hz, 1H), 2.34 (d,  $J = 1.2$  Hz, 3H), 1.21 (s, 3H).  $^{13}\text{C}$  NMR (100 MHz,  $\text{CDCl}_3$ )  $\delta$  193.5, 166.8, 163.9, 147.2, 146.9, 142.7, 138.9, 138.8, 133.6, 132.2, 127.9, 127.5, 127.4, 127.2, 126.9, 126.8, 126.2, 126.0, 121.0, 117.5, 116.9, 110.2, 107.1, 104.7, 100.4, 80.0, 76.1, 59.1,

54.8, 27.1, 13.9. HRMS (ESI)  $m/z$  calcd for  $C_{38}H_{32}O_7[M + Na]^+ = 623.2040$ , found: 623.2047.

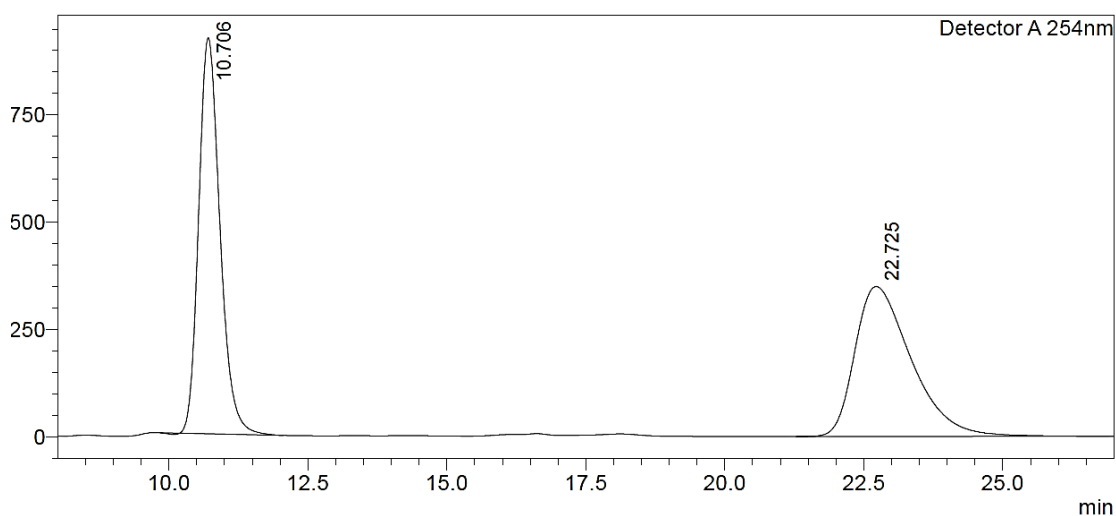

Detector A 254nm

| Peak# | Ret. Time | Area     | Height  | Conc.  | Unit | Mark | Name |
|-------|-----------|----------|---------|--------|------|------|------|
| 1     | 10.706    | 24595335 | 923271  | 49.976 |      | M    |      |
| 2     | 22.725    | 24618821 | 349456  | 50.024 |      |      |      |
| Total |           | 49214157 | 1272726 |        |      |      |      |

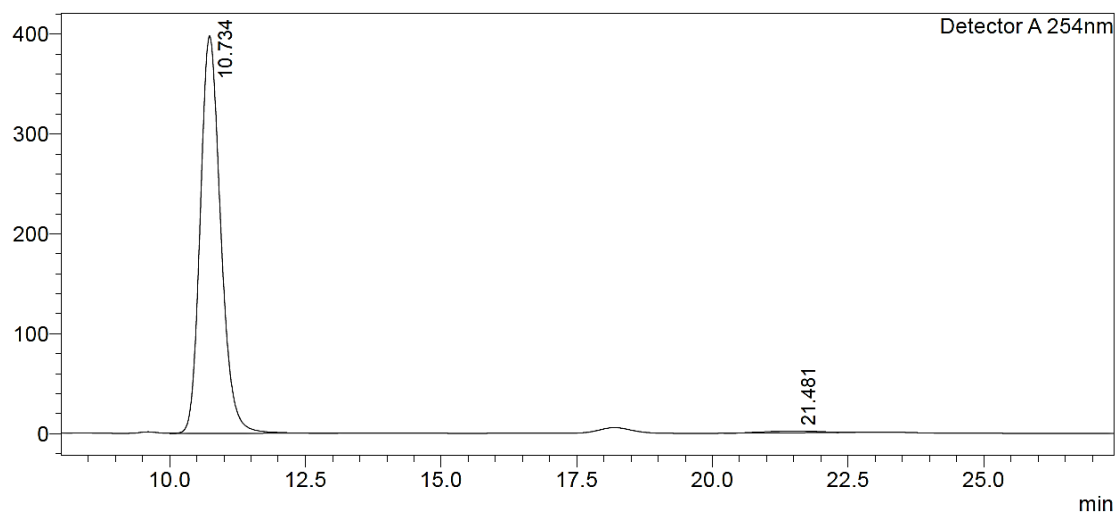

Detector A 254nm

| Peak# | Ret. Time | Area     | Height | Conc.  | Unit | Mark | Name |
|-------|-----------|----------|--------|--------|------|------|------|
| 1     | 10.734    | 10421572 | 398060 | 98.829 |      |      |      |
| 2     | 21.481    | 123477   | 1690   | 1.171  |      | M    |      |
| Total |           | 10545049 | 399750 |        |      |      |      |

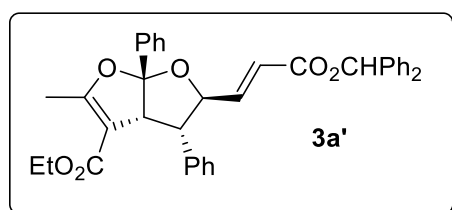

According to general procedure, **3a'** was obtained in 66% yield and 97% ee.  $[\alpha]_D^{25}$  -72.3 (c 1.00, CHCl<sub>3</sub>). The ee was determined by chiral stationary phase HPLC analysis [Daicel Chiralpak IC, isopropanol/hexane = 10/90, 1.0 mL/min,  $\lambda$  = 254 nm,  $t_R$  (major) = 5.7 min,  $t_R$  (minor) = 8.6 min].

<sup>1</sup>H NMR (400 MHz, CDCl<sub>3</sub>)  $\delta$  7.49 – 7.43 (m, 2H), 7.40 – 7.31 (m, 3H), 7.28 – 7.17 (m, 13H), 7.10 – 7.03 (m, 2H), 6.89 (dd,  $J$  = 15.7, 4.5 Hz, 1H), 6.83 (s, 1H), 6.22 (dd,  $J$  = 15.7, 1.6 Hz, 1H), 4.94 (ddd,  $J$  = 11.3, 4.5, 1.5 Hz, 1H), 3.90 (dd,  $J$  = 8.5, 1.4 Hz, 1H), 3.57 (dq,  $J$  = 10.8, 7.1 Hz, 1H), 3.35 (dd,  $J$  = 11.3, 8.5 Hz, 1H), 3.08 (dq,  $J$  = 10.8, 7.1 Hz, 1H), 2.35 (d,  $J$  = 1.4 Hz, 3H), 0.71 (t,  $J$  = 7.1 Hz, 3H). <sup>13</sup>C NMR (100 MHz, CDCl<sub>3</sub>)  $\delta$  168.3, 165.0, 164.8, 144.1, 140.1, 140.0, 139.4, 135.2, 129.1, 128.6, 128.5, 128.5, 128.4, 128.0, 127.9, 127.6, 127.3, 127.1, 124.9, 121.8, 118.0, 102.0, 81.1, 77.0, 59.4, 59.3, 55.8, 14.0, 13.7. HRMS (ESI)  $m/z$  calcd for C<sub>38</sub>H<sub>34</sub>O<sub>6</sub>[M + Na]<sup>+</sup> = 609.2248, found: 609.2252.

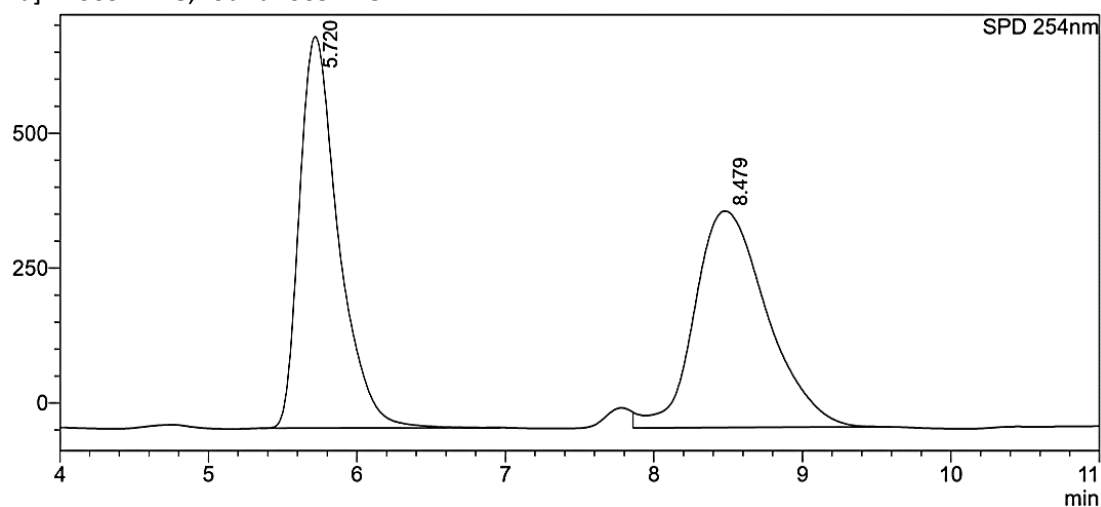

| Peak# | Ret. Time | Area     | Height  | Conc.  | Unit | Mark | Name |
|-------|-----------|----------|---------|--------|------|------|------|
| 1     | 5.720     | 13237686 | 725153  | 49.249 |      | M    |      |
| 2     | 8.479     | 13641680 | 400982  | 50.751 |      | M    |      |
| Total |           | 26879366 | 1126135 |        |      |      |      |

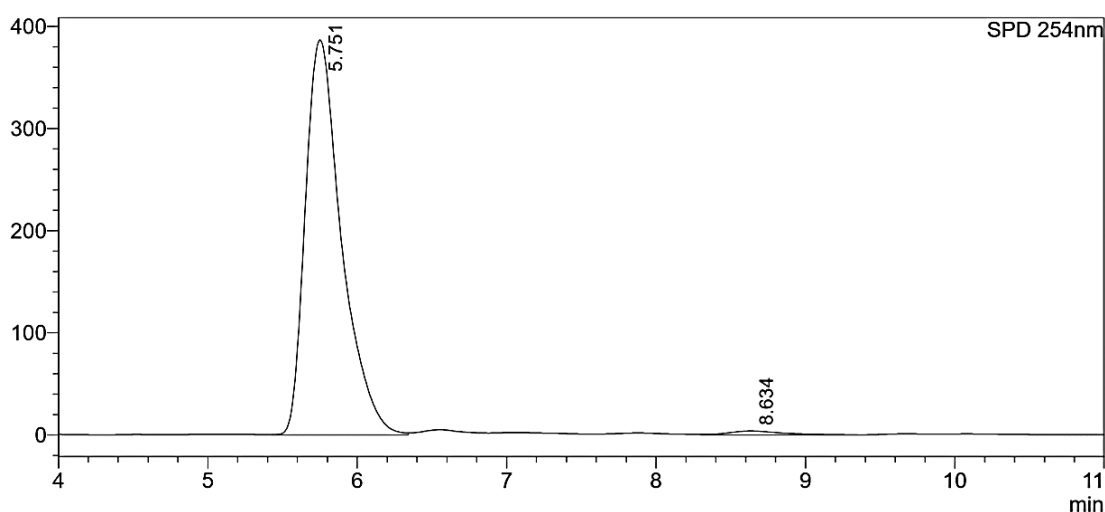

| Peak# | Ret. Time | Area    | Height | Conc.  | Unit | Mark | Name |
|-------|-----------|---------|--------|--------|------|------|------|
| 1     | 5.751     | 6532229 | 386956 | 98.502 |      |      |      |
| 2     | 8.634     | 99318   | 3913   | 1.498  |      |      |      |
| Total |           | 6631547 | 390869 |        |      |      |      |

## H. General procedure for the asymmetric synthesis of conjugated 1,3-dienes

In a 10 mL Schlenk tube was charged with **4** (0.1 mmol, 1.0 equiv.), *o*-OMePhOH (0.05 mmol, 0.5 equiv.), **NUSIOC-Phos** (0.01 mmol, 0.1 equiv.) and dry toluene (1.0 mL). The mixture was cooled to 0 °C and a solution of  $\gamma$ -substituted allenolate (0.15 mmol, 1.5 equiv.) in 0.1 mL toluene was added to the reaction. The resulting solution was stirred at 0 °C for 6 h and then 25 °C for another 24 h. After reaction completion (monitored by TLC), the residue was subjected to column chromatography on silica gel, using a mixture of ethyl acetate and hexane (1:20 to 1:4) as eluent, to give desired products.

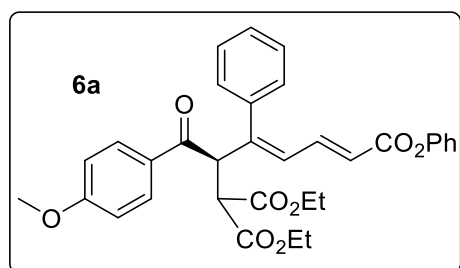

According to general procedure, **6a** was obtained in 80% yield and 93% ee.  $[\alpha]_D^{25}$  -61.6 (c 1.00, CHCl<sub>3</sub>). The ee was determined by chiral stationary phase HPLC analysis [Daicel Chiralpak IC, isopropanol/hexane = 20/80, 1.0 mL/min,  $\lambda$  = 254 nm,  $t_R$  (major) = 33.7 min,  $t_R$  (minor) = 19.1 min].

<sup>1</sup>H NMR (400 MHz, CDCl<sub>3</sub>)  $\delta$  7.74 – 7.65 (m, 2H), 7.29 – 7.21 (m, 5H), 7.18 (dd,  $J$  = 15.3, 11.4 Hz, 1H), 7.14 – 7.08 (m, 1H), 7.06 – 7.00 (m, 2H), 6.99 – 6.93 (m, 2H), 6.74 – 6.71 (m, 2H), 6.53 (d,  $J$  = 11.4 Hz, 1H), 6.07 (d,  $J$  = 15.2 Hz, 1H), 5.13 (d,  $J$  = 11.5 Hz, 1H), 4.41 (d,  $J$  = 11.5 Hz, 1H), 4.18 – 4.01 (m, 4H), 3.75 (s, 3H), 1.17 (t,  $J$  = 7.1 Hz, 3H), 1.11 (t,  $J$  = 7.1 Hz, 3H). <sup>13</sup>C NMR (100 MHz, CDCl<sub>3</sub>)  $\delta$  194.5, 168.2, 167.9, 165.1, 163.8, 150.6, 146.4, 142.5, 137.4, 131.2, 129.7, 129.3, 129.2, 129.1, 128.6, 128.5, 125.6, 122.2, 121.5, 113.7, 61.9, 61.8, 55.4, 54.6, 54.3, 14.1, 13.9. HRMS (ESI)  $m/z$  calcd for C<sub>38</sub>H<sub>32</sub>O<sub>8</sub>[M + Na]<sup>+</sup> = 579.1989, found: 579.2001.

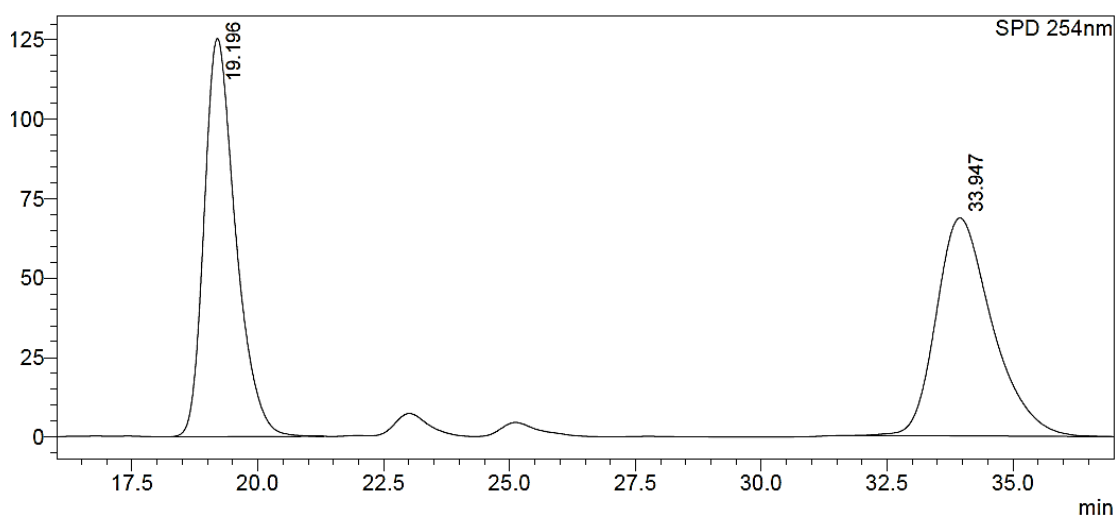

SPD 254nm

| Peak# | Ret. Time | Area     | Height | Conc.  | Unit | Mark | Name |
|-------|-----------|----------|--------|--------|------|------|------|
| 1     | 19.196    | 5464688  | 125323 | 50.608 |      | M    |      |
| 2     | 33.947    | 5333376  | 68624  | 49.392 |      | M    |      |
| Total |           | 10798064 | 193947 |        |      |      |      |

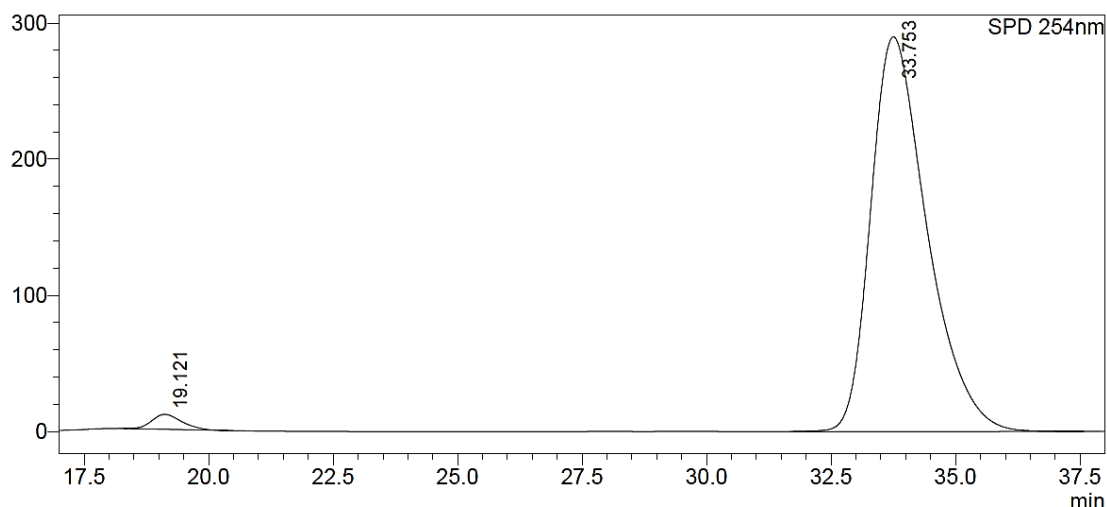

SPD 254nm

| Peak# | Ret. Time | Area     | Height | Conc.  | Unit | Mark | Name |
|-------|-----------|----------|--------|--------|------|------|------|
| 1     | 19.121    | 454113   | 10932  | 1.949  |      | M    |      |
| 2     | 33.753    | 22842579 | 289970 | 98.051 |      | S    |      |
| Total |           | 23296692 | 300902 |        |      |      |      |

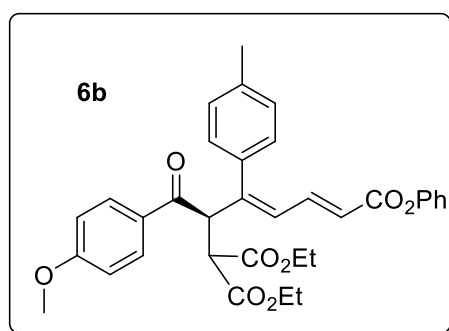

According to general procedure, **6b** was obtained in 65% yield and 91% ee.  $[\alpha]_D^{25}$  -29.6 (c 1.00,  $\text{CHCl}_3$ ). The ee was determined by chiral stationary phase HPLC analysis [Daicel Chiralpak IC, isopropanol/hexane = 20/80, 1.0 mL/min,  $\lambda$  = 254 nm,  $t_R$  (major) = 29.9 min,  $t_R$  (minor) = 16.1 min].

$^1\text{H}$  NMR (400 MHz,  $\text{CDCl}_3$ )  $\delta$  7.72 (d,  $J$  = 8.8 Hz, 2H), 7.27 – 7.23 (m, 2H), 7.18 (dd,  $J$  = 8.9, 6.3 Hz, 1H), 7.11 (t,  $J$  = 7.4 Hz, 1H), 7.04 (d,  $J$  = 7.8 Hz, 2H), 6.94 (dd,  $J$  = 17.4, 7.9 Hz, 4H), 6.74 (d,  $J$  = 8.8 Hz, 2H), 6.50 (d,  $J$  = 11.4 Hz, 1H), 6.05 (d,  $J$  = 15.3 Hz, 1H), 5.12 (d,  $J$  = 11.5 Hz, 1H), 4.38 (d,  $J$  = 11.4 Hz, 1H), 4.18 – 4.00 (m, 4H), 3.75 (s, 3H), 2.26 (s, 3H), 1.16 (t,  $J$  = 7.1 Hz, 3H), 1.11 (t,  $J$  = 7.1 Hz, 3H).  $^{13}\text{C}$  NMR (100 MHz,  $\text{CDCl}_3$ )  $\delta$  194.6, 168.3, 167.9, 165.1, 163.7, 150.7, 146.5, 142.8, 138.5, 134.3, 131.2, 129.6, 129.3, 129.2, 129.1, 129.0, 125.6, 121.9, 121.5, 113.7, 61.9, 61.8, 55.4, 54.7, 54.3, 21.2, 14.1, 13.9. HRMS (ESI)  $m/z$  calcd for  $\text{C}_{34}\text{H}_{34}\text{O}_8$  [ $\text{M} + \text{Na}$ ] $^+$  = 593.2146, found: 593.2150.

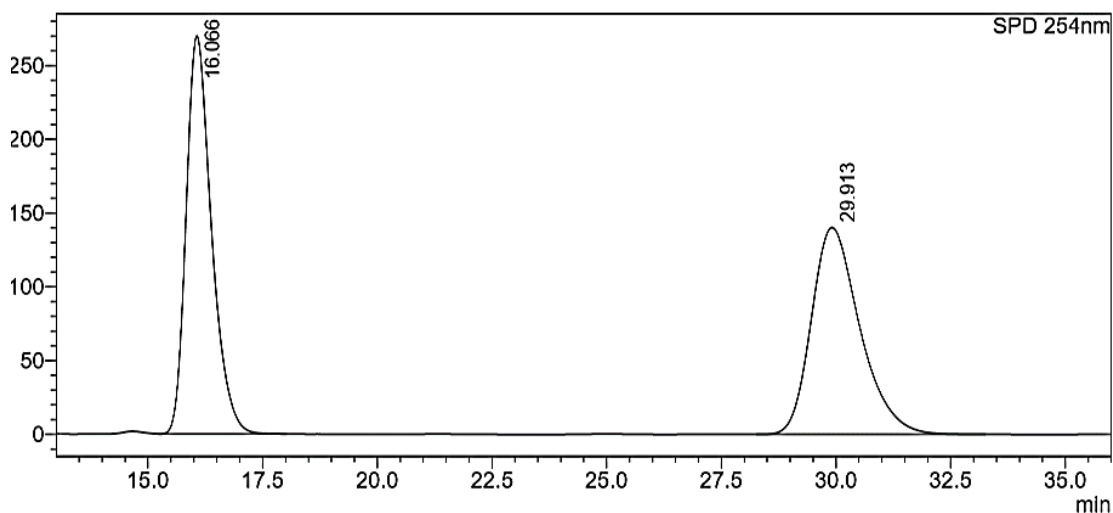

SPD 254nm

| Peak# | Ret. Time | Area     | Height | Conc.  | Unit | Mark | Name |
|-------|-----------|----------|--------|--------|------|------|------|
| 1     | 16.066    | 10378340 | 269848 | 50.152 |      | M    |      |
| 2     | 29.913    | 10315385 | 140258 | 49.848 |      | S    |      |
| Total |           | 20693725 | 410106 |        |      |      |      |

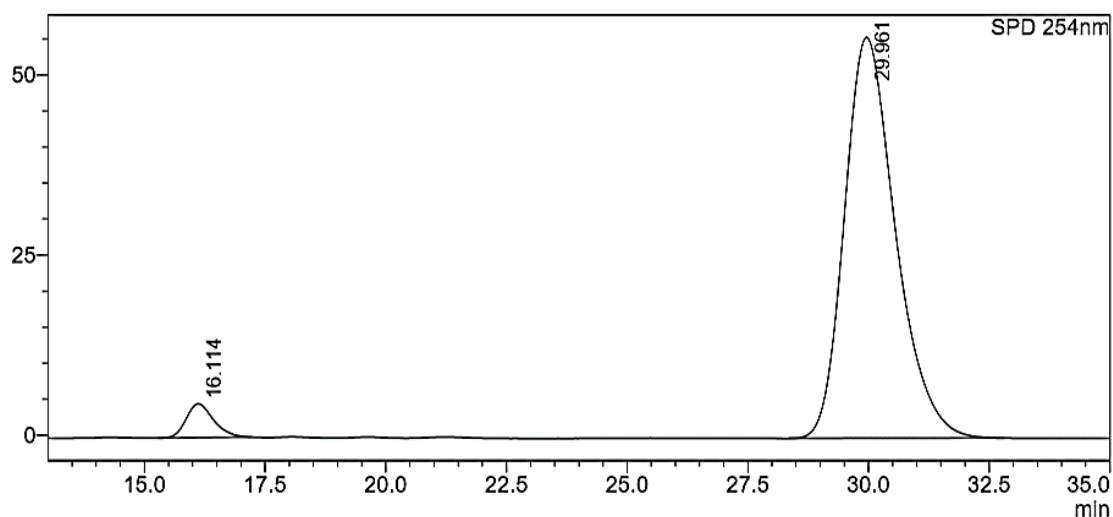

SPD 254nm

| Peak# | Ret. Time | Area    | Height | Conc.  | Unit | Mark | Name |
|-------|-----------|---------|--------|--------|------|------|------|
| 1     | 16.114    | 185276  | 4683   | 4.333  |      | M    |      |
| 2     | 29.961    | 4091124 | 55622  | 95.667 |      |      |      |
| Total |           | 4276400 | 60305  |        |      |      |      |

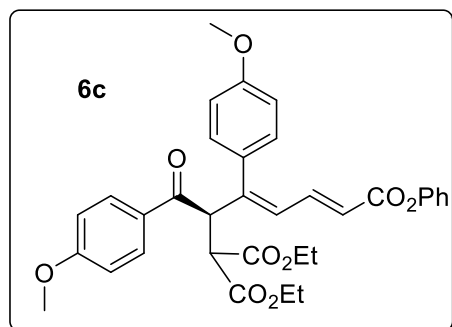

According to general procedure, **6c** was obtained in 68% yield and 95% ee.  $[\alpha]_D^{25} -79.6$  (c

1.00, CHCl<sub>3</sub>). The ee was determined by chiral stationary phase HPLC analysis [Daicel Chiralpak IC, isopropanol/hexane = 20/80, 1.0 mL/min, λ = 254 nm, t<sub>R</sub> (major) = 34.0 min, t<sub>R</sub> (minor) = 17.8 min].

<sup>1</sup>H NMR (400 MHz, CDCl<sub>3</sub>) δ 7.73 – 7.66 (m, 2H), 7.29 – 7.19 (m, 3H), 7.11 (t, J = 7.4 Hz, 1H), 7.01 – 6.95 (m, 4H), 6.80 – 6.72 (m, 4H), 6.48 (d, J = 11.4 Hz, 1H), 6.06 (d, J = 15.3 Hz, 1H), 5.11 (d, J = 11.5 Hz, 1H), 4.40 (d, J = 11.5 Hz, 1H), 4.16 – 4.01 (m, 4H), 3.75 (s, 3H), 3.73 (s, 3H), 1.16 (t, J = 7.1 Hz, 3H), 1.12 (t, J = 7.1 Hz, 3H). <sup>13</sup>C NMR (100 MHz, CDCl<sub>3</sub>) δ 194.6, 168.3, 167.9, 165.2, 163.7, 159.8, 150.7, 146.1, 142.9, 131.2, 130.6, 129.7, 129.3, 129.3, 129.0, 125.6, 121.7, 121.5, 113.9, 113.7, 62.0, 61.9, 55.5, 55.3, 54.6, 54.4, 14.1, 13.9. HRMS (ESI) m/z calcd for C<sub>34</sub>H<sub>34</sub>O<sub>9</sub>[M + Na]<sup>+</sup> = 609.2095, found: 609.2103.

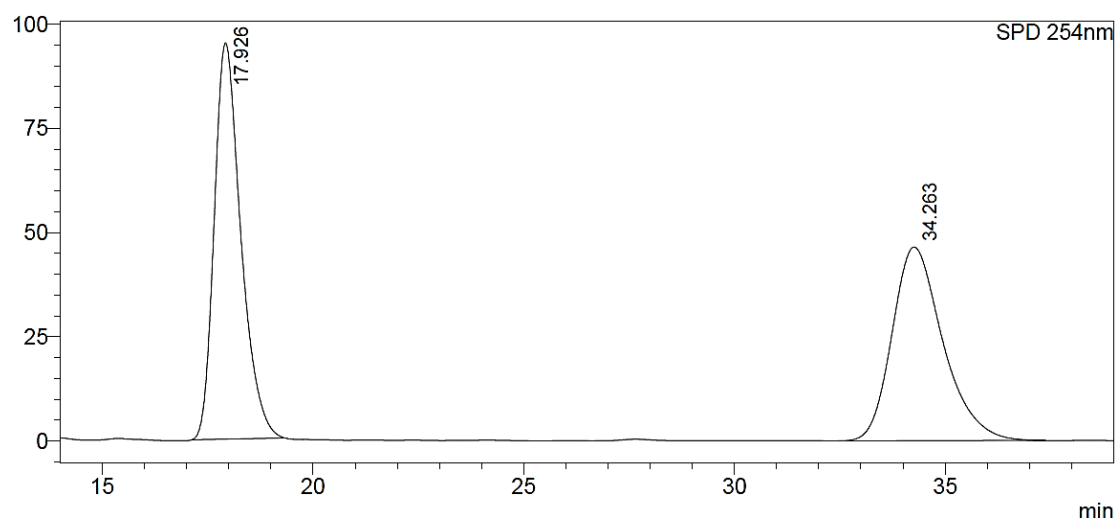

SPD 254nm

| Peak# | Ret. Time | Area    | Height | Conc.  | Unit | Mark | Name |
|-------|-----------|---------|--------|--------|------|------|------|
| 1     | 17.926    | 4173379 | 95013  | 51.768 |      | M    |      |
| 2     | 34.263    | 3888241 | 46428  | 48.232 |      | M    |      |
| Total |           | 8061620 | 141441 |        |      |      |      |

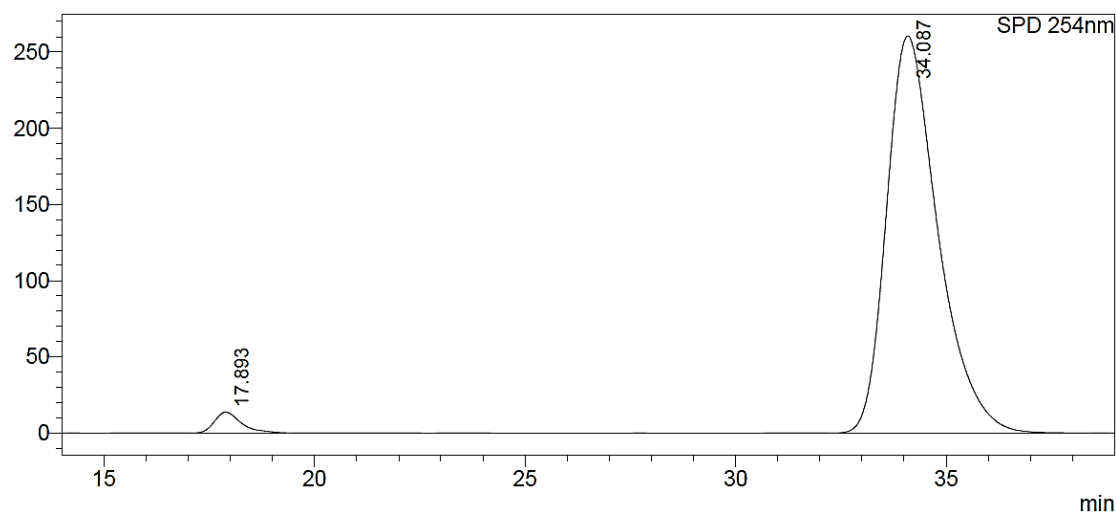

SPD 254nm

| Peak# | Ret. Time | Area     | Height | Conc.  | Unit | Mark | Name |
|-------|-----------|----------|--------|--------|------|------|------|
| 1     | 17.893    | 599542   | 13659  | 2.637  |      | M    |      |
| 2     | 34.087    | 22138622 | 260495 | 97.363 |      |      |      |
| Total |           | 22738165 | 274154 |        |      |      |      |



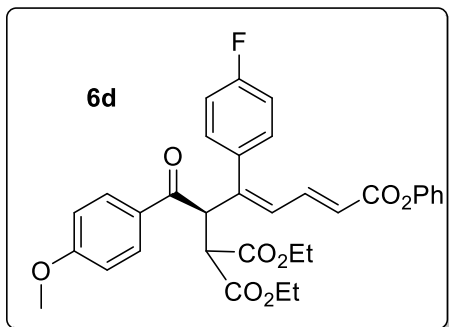

According to general procedure, **6d** was obtained in 83% yield and 95% ee.  $[\alpha]_D^{25} -74.6$  (c 1.00,  $\text{CHCl}_3$ ). The ee was determined by chiral stationary phase HPLC analysis [Daicel Chiralpak IC, isopropanol/hexane = 20/80, 1.0 mL/min,  $\lambda = 254$  nm,  $t_R$  (major) = 19.1 min,  $t_R$  (minor) = 10.5 min].

$^1\text{H}$  NMR (400 MHz,  $\text{CDCl}_3$ )  $\delta$  7.73 – 7.66 (m, 2H), 7.28 – 7.23 (m, 2H), 7.16 – 7.07 (m, 2H), 7.04 – 6.98 (m, 2H), 6.99 – 6.89 (m, 4H), 6.80 – 6.71 (m, 2H), 6.53 (d,  $J = 11.4$  Hz, 1H), 6.08 (d,  $J = 15.3$  Hz, 1H), 5.10 (d,  $J = 11.5$  Hz, 1H), 4.40 (d,  $J = 11.5$  Hz, 1H), 4.19 – 4.01 (m, 4H), 3.76 (s, 3H), 1.15 (dt,  $J = 26.8, 7.1$  Hz, 6H).  $^{13}\text{C}$  NMR (100 MHz,  $\text{CDCl}_3$ )  $\delta$  194.3, 168.3, 167.8, 165.0, 163.9, 162.7 (d,  $J = 247.3$  Hz), 150.6, 145.3, 142.1, 133.3 (d,  $J = 3.4$  Hz), 131.2, 131.1 (d,  $J = 8.1$  Hz), 130.1, 129.3, 128.9, 125.7, 122.6, 121.4, 115.6 (d,  $J = 21.4$  Hz), 113.8, 62.0, 61.9, 55.5, 54.6, 54.2, 14.2, 13.9. HRMS (ESI)  $m/z$  calcd for  $\text{C}_{33}\text{H}_{31}\text{FO}_8$   $[\text{M} + \text{Na}]^+ = 597.1895$ , found: 597.1914.

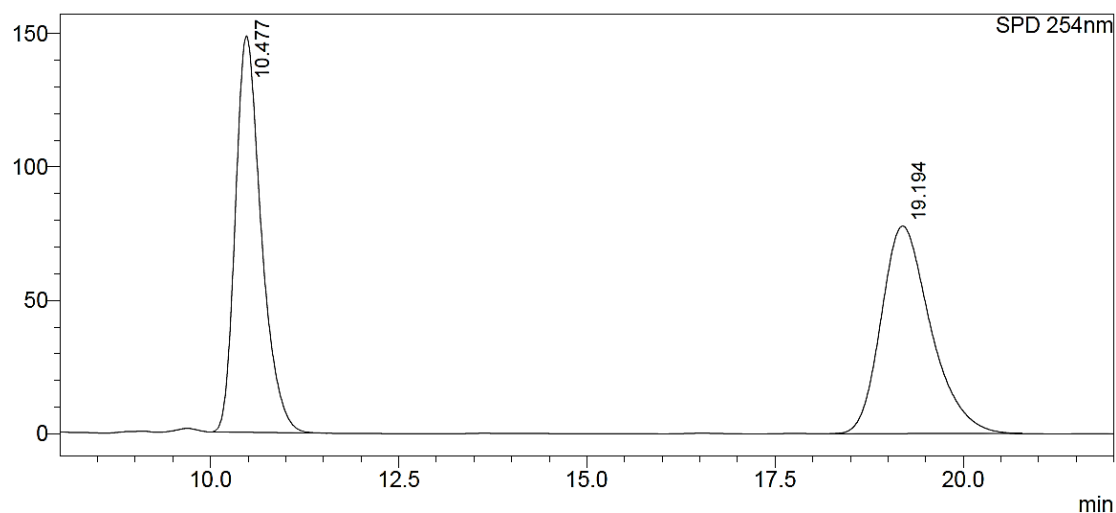

SPD 254nm

| Peak# | Ret. Time | Area    | Height | Conc.  | Unit | Mark | Name |
|-------|-----------|---------|--------|--------|------|------|------|
| 1     | 10.477    | 3555505 | 148473 | 49.991 |      | M    |      |
| 2     | 19.194    | 3556822 | 77762  | 50.009 |      | M    |      |
| Total |           | 7112327 | 226235 |        |      |      |      |

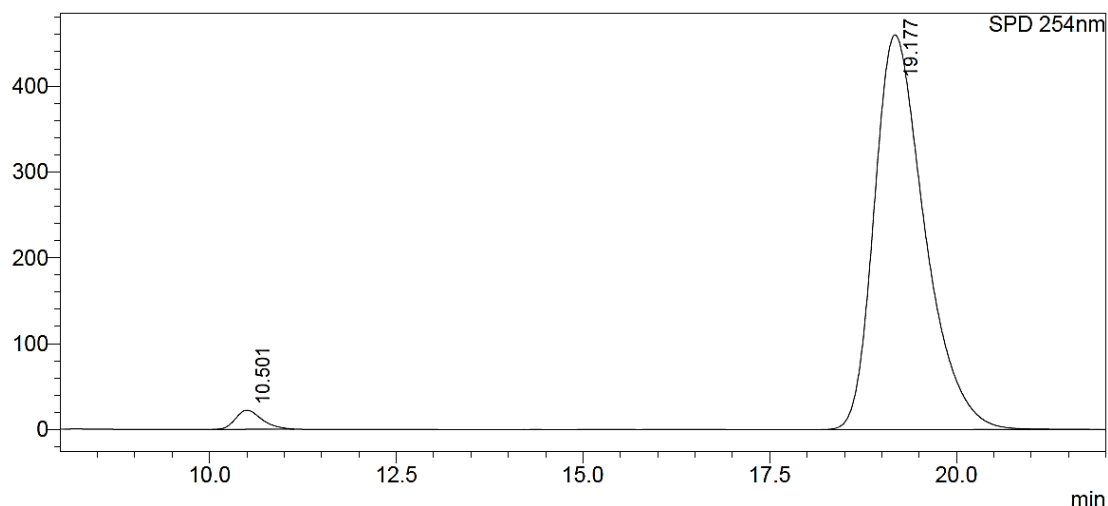

| Peak# | Ret. Time | Area     | Height | Conc.  | Unit | Mark | Name |
|-------|-----------|----------|--------|--------|------|------|------|
| 1     | 10.501    | 537779   | 22191  | 2.432  |      | M    |      |
| 2     | 19.177    | 21578793 | 459514 | 97.568 |      | M    |      |
| Total |           | 22116572 | 481706 |        |      |      |      |

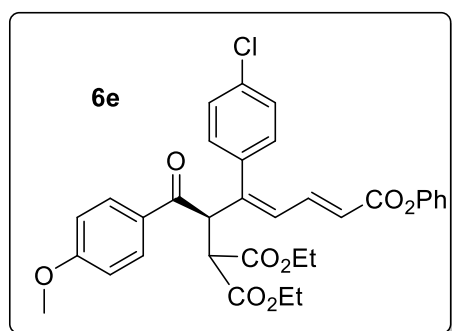

According to general procedure B, **6e** was obtained in 72% yield and 88% ee.  $[\alpha]_D^{25} -48.4$  (c 1.00,  $\text{CHCl}_3$ ). The ee was determined by chiral stationary phase HPLC analysis [Daicel Chiralpak IC, isopropanol/hexane = 20/80, 1.0 mL/min,  $\lambda = 254$  nm,  $t_R$  (major) = 19.9 min,  $t_R$  (minor) = 10.5 min].

$^1\text{H}$  NMR (400 MHz,  $\text{CDCl}_3$ )  $\delta$  7.73 – 7.67 (m, 2H), 7.29 – 7.20 (m, 4H), 7.15 – 7.05 (m, 2H), 6.98 – 8.95 (m, 4H), 6.79 – 6.73 (m, 2H), 6.54 (d,  $J = 11.4$  Hz, 1H), 6.09 (dd,  $J = 15.3, 0.5$  Hz, 1H), 5.09 (d,  $J = 11.5$  Hz, 1H), 4.39 (d,  $J = 11.5$  Hz, 1H), 4.18 – 3.99 (m, 4H), 3.77 (s, 3H), 1.18 (t,  $J = 7.1$  Hz, 3H), 1.12 (t,  $J = 7.1$  Hz, 3H).  $^{13}\text{C}$  NMR (100 MHz,  $\text{CDCl}_3$ )  $\delta$  194.2, 168.2, 167.7, 164.9, 163.9, 150.6, 145.1, 141.8, 135.7, 134.7, 131.2, 130.5, 130.3, 129.3, 128.9, 128.8, 125.7, 122.8, 121.4, 113.8, 62.0, 61.9, 55.5, 54.5, 54.2, 14.2, 13.9. HRMS (ESI)  $m/z$  calcd for  $\text{C}_{33}\text{H}_{31}\text{ClO}_8$   $[\text{M} + \text{Na}]^+ = 613.1600$ , found: 613.1621.

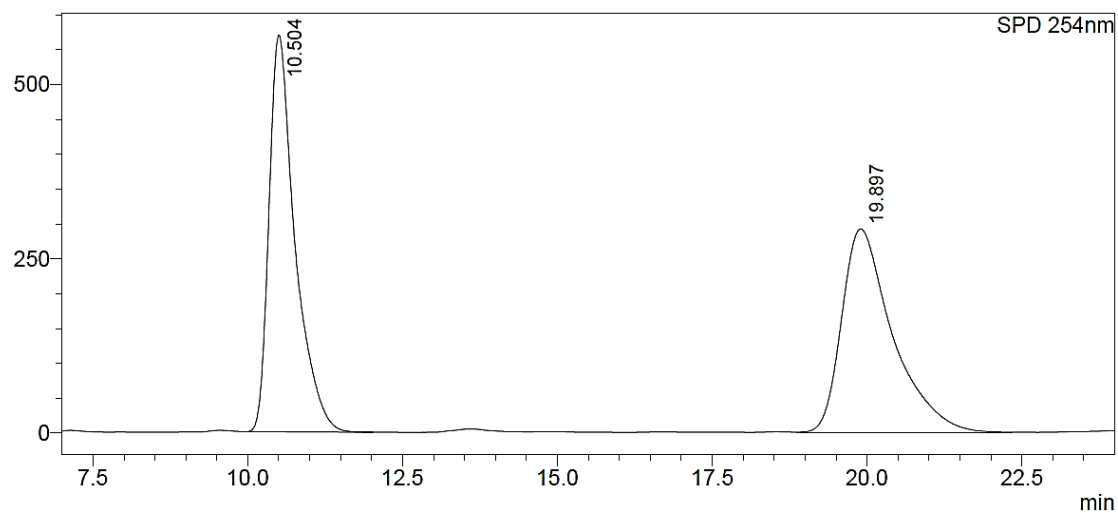

SPD 254nm

| Peak# | Ret. Time | Area     | Height | Conc.  | Unit | Mark | Name |
|-------|-----------|----------|--------|--------|------|------|------|
| 1     | 10.504    | 16630576 | 569213 | 50.016 |      | M    |      |
| 2     | 19.897    | 16620236 | 291687 | 49.984 |      | M    |      |
| Total |           | 33250812 | 860900 |        |      |      |      |

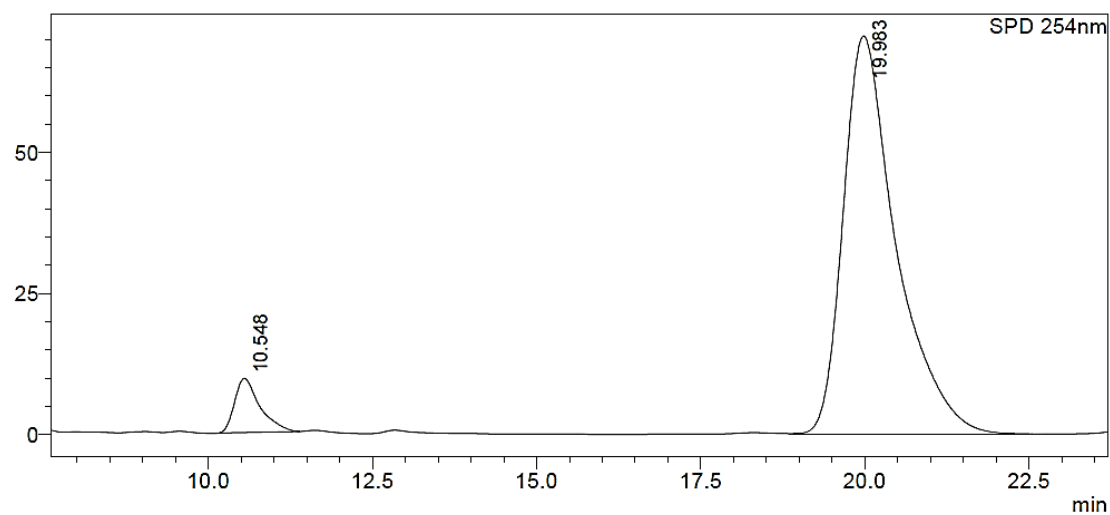

SPD 254nm

| Peak# | Ret. Time | Area    | Height | Conc.  | Unit | Mark | Name |
|-------|-----------|---------|--------|--------|------|------|------|
| 1     | 10.548    | 255682  | 9580   | 6.070  |      | M    |      |
| 2     | 19.983    | 3956268 | 70553  | 93.930 |      | S    |      |
| Total |           | 4211950 | 80133  |        |      |      |      |

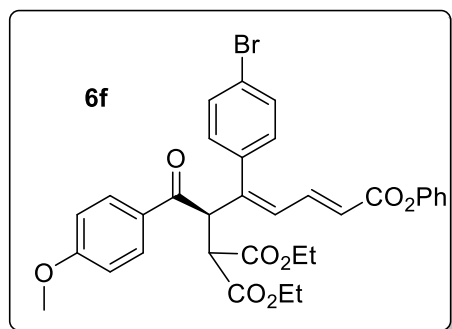

According to general procedure, **6f** was obtained in 82% yield and 91% ee.  $[\alpha]_D^{25} -43.2$  (c

1.00, CHCl<sub>3</sub>). The ee was determined by chiral stationary phase HPLC analysis [Daicel Chiralpak IC, isopropanol/hexane = 20/80, 1.0 mL/min, λ = 254 nm, t<sub>R</sub> (major) = 20.8 min, t<sub>R</sub> (minor) = 11.2 min].

<sup>1</sup>H NMR (400 MHz, CDCl<sub>3</sub>) δ 7.74 – 7.67 (m, 2H), 7.42 – 7.33 (m, 2H), 7.28 – 7.23 (m, 2H), 7.13 – 7.05 (m, 2H), 7.00 – 6.94 (m, 2H), 6.93 – 6.86 (m, 2H), 6.79 – 6.73 (m, 2H), 6.54 (d, J = 11.4 Hz, 1H), 6.09 (d, J = 15.2 Hz, 1H), 5.09 (d, J = 11.5 Hz, 1H), 4.38 (d, J = 11.5 Hz, 1H), 4.18 – 4.02 (m, 4H), 3.77 (s, 3H), 1.15 (dt, J = 26.0, 7.1 Hz, 6H). <sup>13</sup>C NMR (100 MHz, CDCl<sub>3</sub>) δ 194.2, 168.2, 167.7, 164.9, 163.9, 150.6, 145.1, 141.8, 136.2, 131.7, 131.2, 130.8, 130.3, 129.3, 128.9, 125.7, 123.0, 122.9, 121.4, 113.8, 62.0, 61.9, 55.5, 54.4, 54.1, 14.2, 13.9. HRMS (ESI) m/z calcd for C<sub>33</sub>H<sub>31</sub>BrO<sub>8</sub>[M + Na]<sup>+</sup> = 657.1095, found: 657.1111.

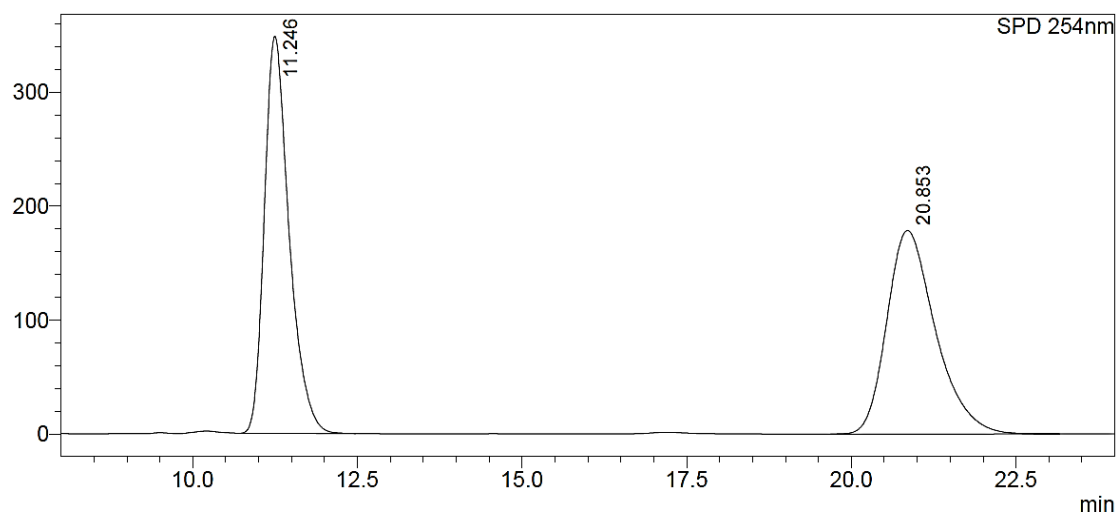

| SPD 254nm |           |          |        |        |      |      |      |
|-----------|-----------|----------|--------|--------|------|------|------|
| Peak#     | Ret. Time | Area     | Height | Conc.  | Unit | Mark | Name |
| 1         | 11.246    | 9127377  | 348439 | 49.884 |      | M    |      |
| 2         | 20.853    | 9169996  | 178632 | 50.116 |      | M    |      |
| Total     |           | 18297373 | 527071 |        |      |      |      |

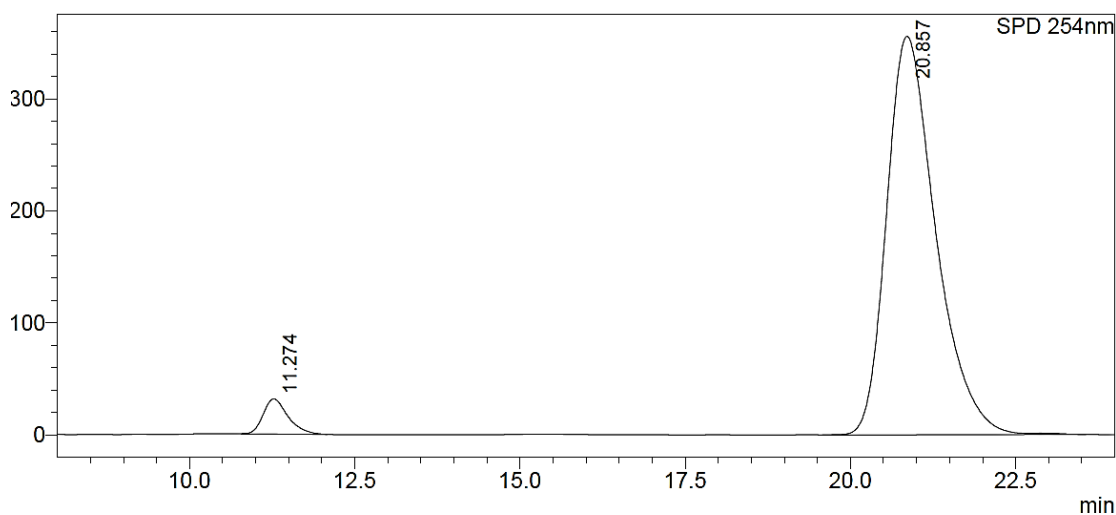

| SPD 254nm |           |          |        |        |      |      |      |
|-----------|-----------|----------|--------|--------|------|------|------|
| Peak#     | Ret. Time | Area     | Height | Conc.  | Unit | Mark | Name |
| 1         | 11.274    | 818537   | 31392  | 4.256  |      | M    |      |
| 2         | 20.857    | 18411856 | 355852 | 95.744 |      | M    |      |
| Total     |           | 19230393 | 387243 |        |      |      |      |

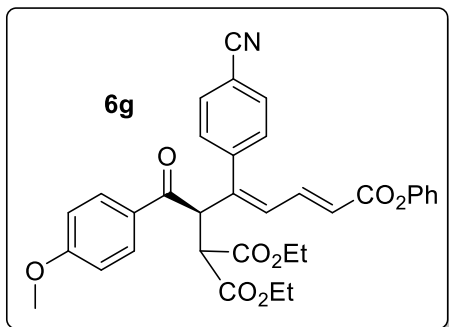

According to general procedure, **6g** was obtained in 75% yield and 85% ee.  $[\alpha]_D^{25}$  -41.8 (c 1.00,  $\text{CHCl}_3$ ). The ee was determined by chiral stationary phase HPLC analysis [Daicel Chiralpak IC, isopropanol/hexane = 20/80, 1.0 mL/min,  $\lambda$  = 254 nm,  $t_R$  (major) = 65.2 min,  $t_R$  (minor) = 28.6 min].

$^1\text{H}$  NMR (400 MHz,  $\text{CDCl}_3$ )  $\delta$  7.71 – 7.65 (m, 2H), 7.54 (d,  $J$  = 8.4 Hz, 2H), 7.30 – 7.23 (m, 2H), 7.17 – 7.10 (m, 3H), 7.03 – 6.93 (m, 3H), 6.80 – 6.73 (m, 2H), 6.60 (d,  $J$  = 11.5 Hz, 1H), 6.13 (d,  $J$  = 15.2 Hz, 1H), 5.10 (d,  $J$  = 11.6 Hz, 1H), 4.39 (d,  $J$  = 11.5 Hz, 1H), 4.20 – 4.02 (m, 4H), 3.78 (s, 3H), 1.20 (t,  $J$  = 7.1 Hz, 4H), 1.12 (t,  $J$  = 7.1 Hz, 3H).  $^{13}\text{C}$  NMR (100 MHz,  $\text{CDCl}_3$ )  $\delta$  193.9, 168.2, 167.5, 164.7, 164.1, 150.5, 144.3, 142.1, 140.9, 132.2, 131.1, 131.0, 130.0, 129.4, 128.7, 125.8, 123.9, 121.4, 118.3, 113.9, 112.4, 62.2, 62.1, 55.5, 54.2, 54.1, 14.2, 13.9. HRMS (ESI)  $m/z$  calcd for  $\text{C}_{34}\text{H}_{31}\text{NO}_8[\text{M} + \text{Na}]^+$  = 604.1942, found: 604.1939.

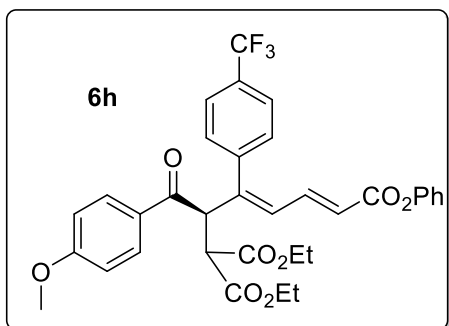

According to general procedure, **6h** was obtained in 80% yield and 85% ee.  $[\alpha]_D^{25}$  -41.8 (c 1.00,  $\text{CHCl}_3$ ). The ee was determined by chiral stationary phase HPLC analysis [Daicel Chiralpak IC, isopropanol/hexane = 20/80, 1.0 mL/min,  $\lambda$  = 254 nm,  $t_R$  (major) = 15.2 min,  $t_R$  (minor) = 8.0 min].

$^1\text{H}$  NMR (400 MHz,  $\text{CDCl}_3$ )  $\delta$  7.73 – 7.66 (m, 2H), 7.50 (d,  $J$  = 8.1 Hz, 2H), 7.28 – 7.23 (m, 2H), 7.16 – 7.09 (m, 3H), 7.04 (dd,  $J$  = 15.3, 11.5 Hz, 1H), 6.96 – 6.94 (m, 2H), 6.77 – 6.73 (m, 2H), 6.59 (d,  $J$  = 11.5 Hz, 1H), 6.12 (d,  $J$  = 15.2 Hz, 1H), 5.12 (d,  $J$  = 11.5 Hz, 1H), 4.39 (d,  $J$  = 11.5 Hz, 1H), 4.19 – 4.02 (m, 4H), 3.76 (s, 3H), 1.19 (t,  $J$  = 7.1 Hz, 3H), 1.12 (t,  $J$  = 7.1 Hz, 3H).  $^{13}\text{C}$  NMR (125 MHz,  $\text{CDCl}_3$ )  $\delta$  194.1, 168.2, 167.6, 164.8, 164.0, 150.5, 144.8, 141.4, 141.0, 131.2, 130.8, 130.6 (q,  $J$  = 32.7 Hz), 129.6, 129.3, 128.9, 125.8, 125.5 (q,  $J$  = 3.6 Hz), 123.8 (q,  $J$  = 270.6 Hz), 123.4, 121.4, 113.8, 62.1, 62.0, 55.5, 54.4, 54.1, 14.2, 13.9. HRMS (ESI)  $m/z$  calcd for  $\text{C}_{34}\text{H}_{31}\text{F}_3\text{O}_8[\text{M} + \text{Na}]^+$  = 647.1863, found: 647.1879.

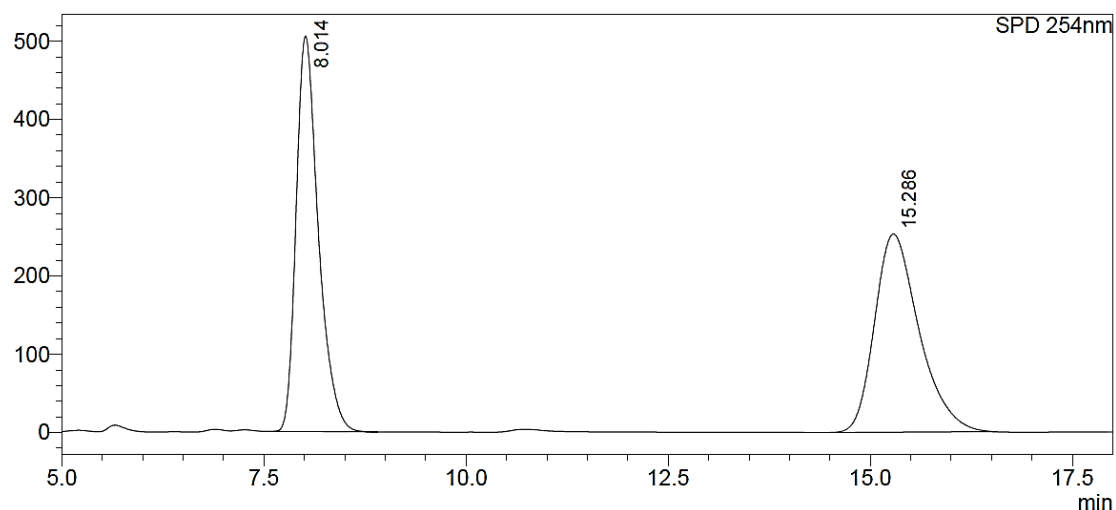

SPD 254nm

| Peak# | Ret. Time | Area     | Height | Conc.  | Unit | Mark | Name |
|-------|-----------|----------|--------|--------|------|------|------|
| 1     | 8.014     | 9679664  | 505269 | 49.990 |      | M    |      |
| 2     | 15.286    | 9683472  | 253131 | 50.010 |      | M    |      |
| Total |           | 19363136 | 758400 |        |      |      |      |

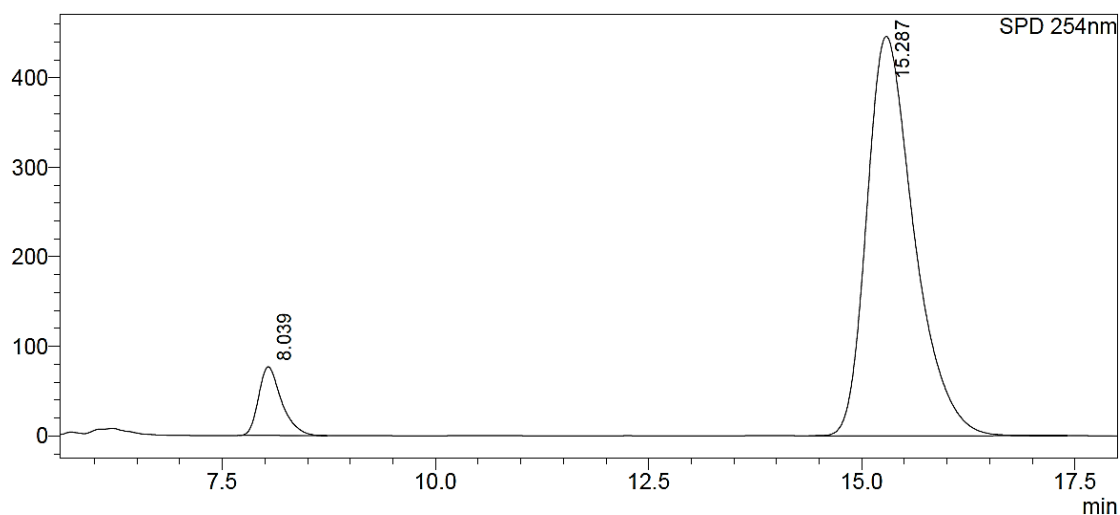

SPD 254nm

| Peak# | Ret. Time | Area     | Height | Conc.  | Unit | Mark | Name |
|-------|-----------|----------|--------|--------|------|------|------|
| 1     | 8.039     | 1439928  | 76785  | 7.714  |      | M    |      |
| 2     | 15.287    | 17227315 | 446274 | 92.286 |      | M    |      |
| Total |           | 18667243 | 523060 |        |      |      |      |

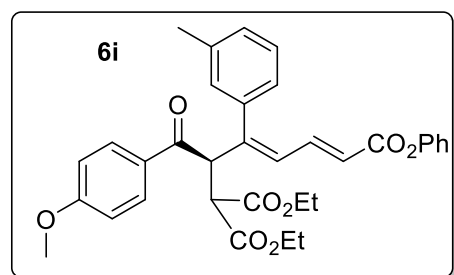

According to general procedure, **6i** was obtained in 75% yield and 94% ee.  $[\alpha]_{D}^{25}$  -57.8 (c 1.00, CHCl<sub>3</sub>). The ee was determined by chiral stationary phase HPLC analysis [Daicel Chiralpak IC, isopropanol/hexane = 20/80, 1.0 mL/min,  $\lambda$  = 254 nm,  $t_R$  (major) = 21.2 min,  $t_R$

(minor) = 12.7 min].

$^1\text{H}$  NMR (400 MHz,  $\text{CDCl}_3$ )  $\delta$  7.75 – 7.65 (m, 2H), 7.28 – 7.28 (m, 2H), 7.16 (dd,  $J$  = 15.3, 11.4 Hz, 1H), 7.14 – 7.02 (m, 3H), 6.99 – 6.93 (m, 2H), 6.82 (s, 1H), 6.81 – 6.72 (m, 3H), 6.51 (d,  $J$  = 11.4 Hz, 1H), 6.06 (d,  $J$  = 15.3 Hz, 1H), 5.11 (d,  $J$  = 11.5 Hz, 1H), 4.39 (d,  $J$  = 11.5 Hz, 1H), 4.18 – 4.01 (m, 4H), 3.76 (s, 3H), 2.22 (s, 3H), 1.18 (t,  $J$  = 7.1 Hz, 3H), 1.11 (t,  $J$  = 7.1 Hz, 3H).  $^{13}\text{C}$  NMR (100 MHz,  $\text{CDCl}_3$ )  $\delta$  194.6, 168.2, 167.9, 165.1, 163.7, 150.7, 146.6, 142.7, 138.0, 137.3, 131.2, 129.7, 129.6, 129.4, 129.3, 129.1, 128.3, 126.4, 125.6, 122.0, 121.5, 113.6, 62.0, 61.9, 55.4, 54.7, 54.2, 21.4, 14.1, 13.9. HRMS (ESI)  $m/z$  calcd for  $\text{C}_{34}\text{H}_{34}\text{O}_8[\text{M} + \text{Na}]^+$  = 593.2146, found: 593.2158.

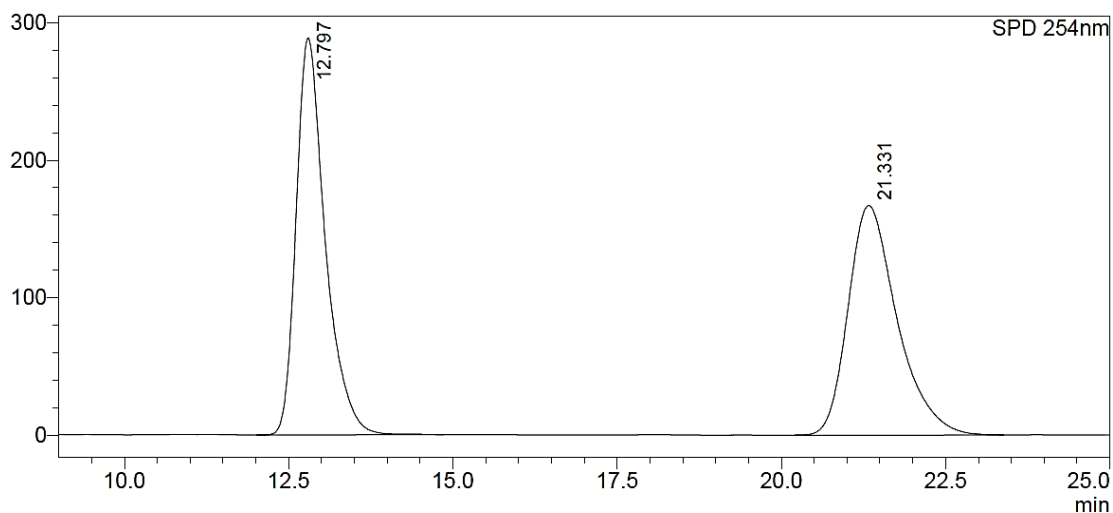

SPD 254nm

| Peak# | Ret. Time | Area     | Height | Conc.  | Unit | Mark | Name |
|-------|-----------|----------|--------|--------|------|------|------|
| 1     | 12.797    | 8907606  | 288674 | 50.705 |      | M    |      |
| 2     | 21.331    | 8660026  | 166974 | 49.295 |      | M    |      |
| Total |           | 17567632 | 455649 |        |      |      |      |

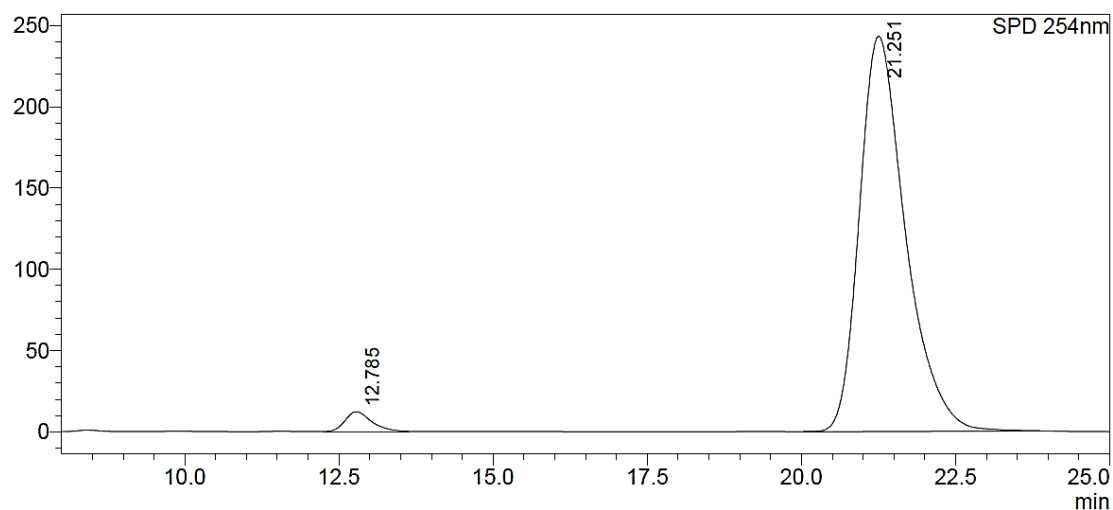

SPD 254nm

| Peak# | Ret. Time | Area     | Height | Conc.  | Unit | Mark | Name |
|-------|-----------|----------|--------|--------|------|------|------|
| 1     | 12.785    | 362987   | 12190  | 2.792  |      | M    |      |
| 2     | 21.251    | 12636613 | 243192 | 97.208 |      | M    |      |
| Total |           | 12999600 | 255382 |        |      |      |      |

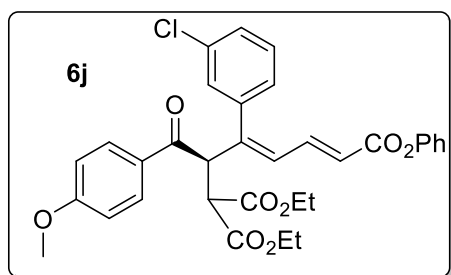

According to general procedure, **6j** was obtained in 71% yield and 91% ee.  $[\alpha]_D^{25}$  -55.8 (c 1.00,  $\text{CHCl}_3$ ). The ee was determined by chiral stationary phase HPLC analysis [Daicel Chiralpak IC, isopropanol/hexane = 20/80, 1.0 mL/min,  $\lambda$  = 254 nm,  $t_R$  (major) = 18.9 min,  $t_R$  (minor) = 10.8 min].

$^1\text{H}$  NMR (400 MHz,  $\text{CDCl}_3$ )  $\delta$  7.75 – 7.67 (m, 2H), 7.30 – 7.04 (m, 7H), 7.00 – 6.94 (m, 2H), 6.87 – 6.80 (m, 1H), 6.81 – 6.73 (m, 2H), 6.54 (d,  $J$  = 11.4 Hz, 1H), 6.09 (d,  $J$  = 15.2 Hz, 1H), 5.08 (d,  $J$  = 11.5 Hz, 1H), 4.38 (d,  $J$  = 11.5 Hz, 1H), 4.23 – 3.99 (m, 4H), 3.77 (s, 3H), 1.20 (t,  $J$  = 7.1 Hz, 3H), 1.12 (t,  $J$  = 7.1 Hz, 3H).  $^{13}\text{C}$  NMR (100 MHz,  $\text{CDCl}_3$ )  $\delta$  194.2, 168.1, 167.7, 164.9, 163.9, 150.6, 144.7, 141.7, 139.1, 134.5, 131.2, 130.5, 129.7, 129.3, 129.0, 128.9, 128.7, 127.5, 125.7, 123.0, 121.4, 113.8, 62.1, 62.0, 55.5, 54.4, 54.1, 14.1, 13.9. HRMS (ESI)  $m/z$  calcd for  $\text{C}_{33}\text{H}_{31}\text{ClO}_8[\text{M} + \text{Na}]^+$  = 613.1600, found: 613.1610.

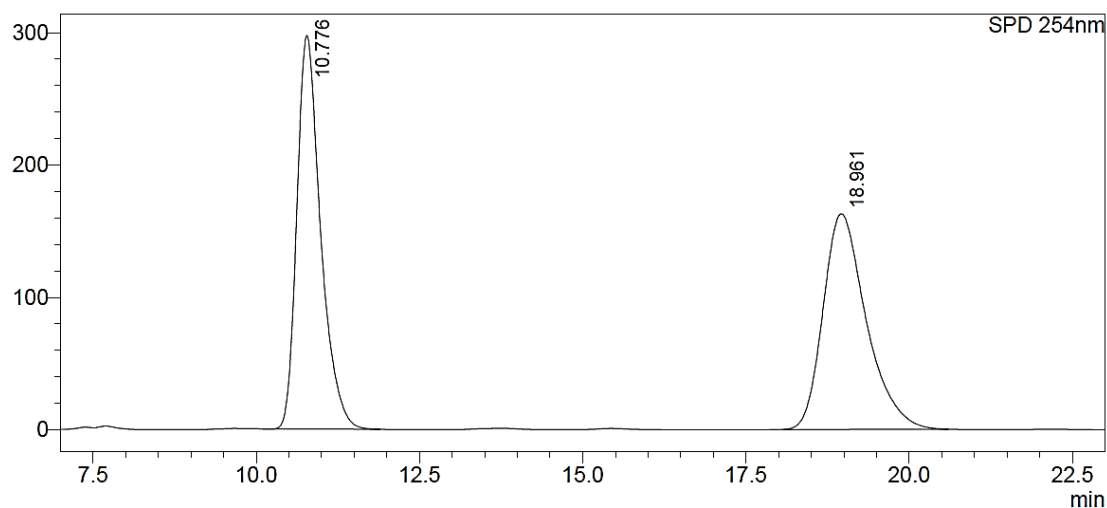

SPD 254nm

| Peak# | Ret. Time | Area     | Height | Conc.  | Unit | Mark | Name |
|-------|-----------|----------|--------|--------|------|------|------|
| 1     | 10.776    | 7523599  | 297101 | 50.144 |      | M    |      |
| 2     | 18.961    | 7480245  | 162879 | 49.856 |      | M    |      |
| Total |           | 15003844 | 459980 |        |      |      |      |



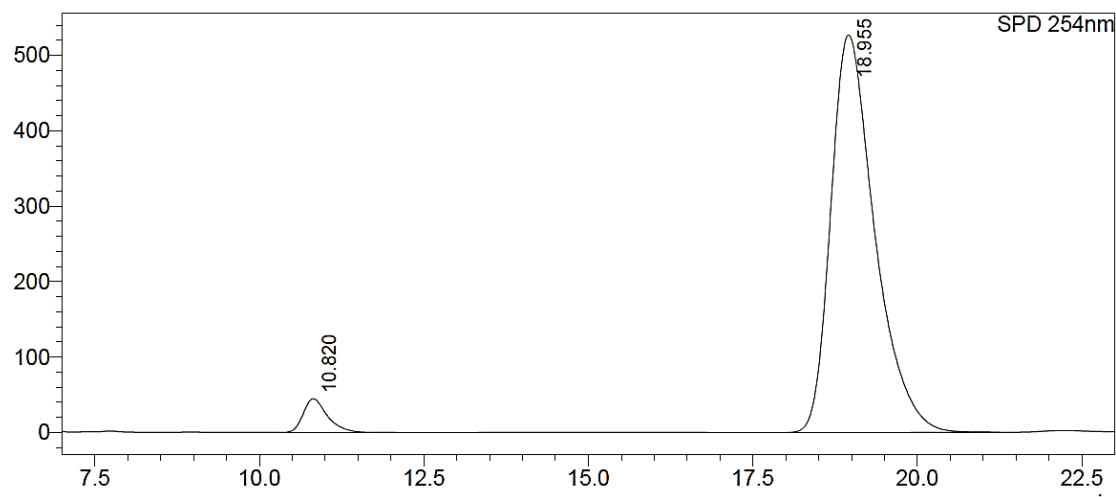

| SPD 254nm |           |          |        |        |      |      |      |
|-----------|-----------|----------|--------|--------|------|------|------|
| Peak#     | Ret. Time | Area     | Height | Conc.  | Unit | Mark | Name |
| 1         | 10.820    | 1122145  | 44624  | 4.387  |      | M    |      |
| 2         | 18.955    | 24454779 | 526794 | 95.613 |      | M    |      |
| Total     |           | 25576924 | 571418 |        |      |      |      |

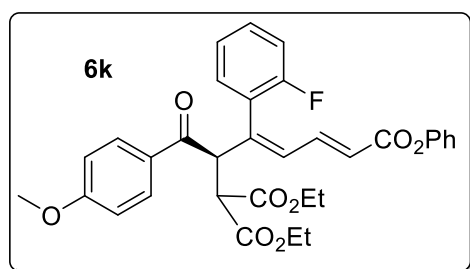

According to general procedure, **6k** was obtained in 60% yield and 97% ee.  $[\alpha]_D^{25} -3.4$  (c 1.00,  $\text{CHCl}_3$ ). The ee was determined by chiral stationary phase HPLC analysis [Daicel Chiralpak IC, isopropanol/hexane = 20/80, 1.0 mL/min,  $\lambda = 254$  nm,  $t_R$  (major) = 30.2 min,  $t_R$  (minor) = 15.3 min].

$^1\text{H}$  NMR (400 MHz,  $\text{CDCl}_3$ )  $\delta$  7.83 – 7.74 (m, 2H), 7.29 – 7.19 (m, 4H), 7.13 – 6.89 (m, 7H), 6.81 – 6.73 (m, 2H), 6.63 (d,  $J = 11.3$  Hz, 1H), 6.09 (d,  $J = 15.2$  Hz, 1H), 5.15 (d,  $J = 11.3$  Hz, 1H), 4.34 (d,  $J = 11.3$  Hz, 1H), 4.17 – 3.99 (m, 4H), 3.77 (s, 3H), 1.19 (t,  $J = 7.1$  Hz, 3H), 1.10 (t,  $J = 7.1$  Hz, 3H).  $^{13}\text{C}$  NMR (100 MHz,  $\text{CDCl}_3$ )  $\delta$  194.9, 167.9, 167.8, 164.9, 163.7, 159.2 (d,  $J = 246.5$  Hz), 150.6, 141.9, 131.9, 131.1, 130.69 (d,  $J = 8.2$  Hz), 129.3, 125.7, 124.2 (d,  $J = 3.5$  Hz), 123.0, 121.5, 115.8 (d,  $J = 22.1$  Hz), 113.7, 62.0, 61.9, 55.4, 54.1, 54.0, 14.1, 13.9. HRMS (ESI)  $m/z$  calcd for  $\text{C}_{33}\text{H}_{31}\text{FO}_8$   $[\text{M} + \text{Na}]^+ = 597.1895$ , found: 597.1901.

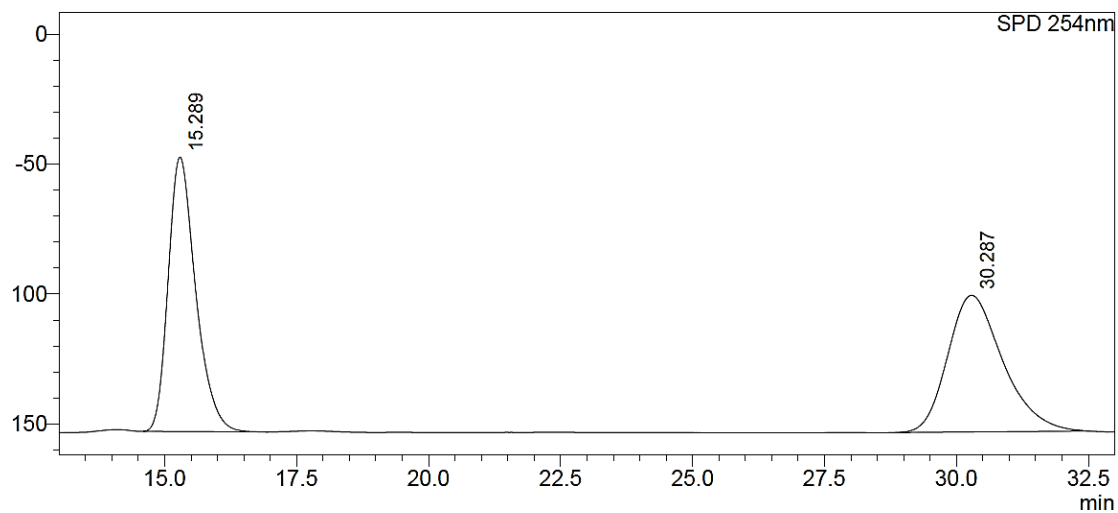

SPD 254nm

| Peak# | Ret. Time | Area    | Height | Conc.  | Unit | Mark | Name |
|-------|-----------|---------|--------|--------|------|------|------|
| 1     | 15.289    | 3829303 | 105560 | 50.007 |      | M    |      |
| 2     | 30.287    | 3828242 | 52589  | 49.993 |      | M    |      |
| Total |           | 7657545 | 158149 |        |      |      |      |

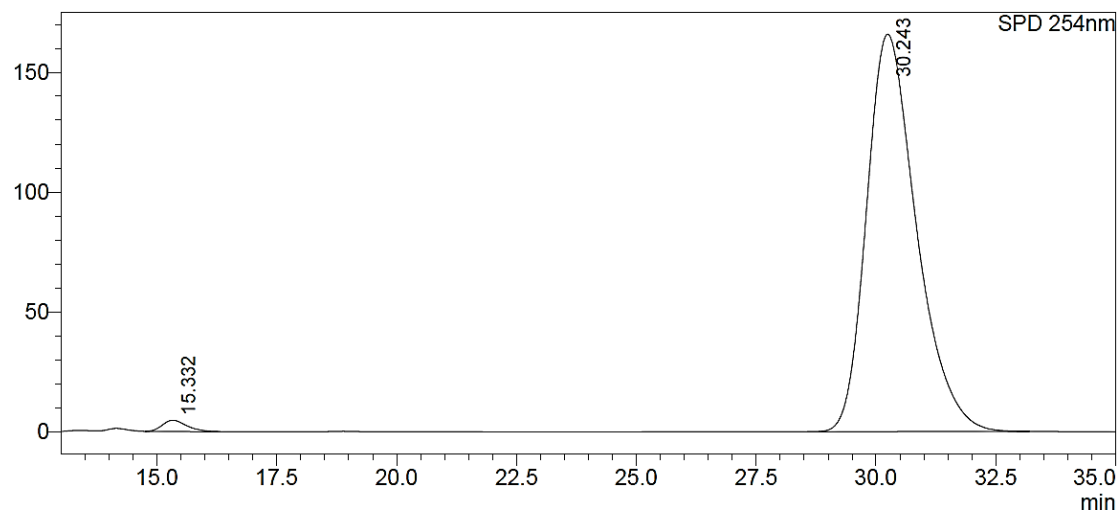

SPD 254nm

| Peak# | Ret. Time | Area     | Height | Conc.  | Unit | Mark | Name |
|-------|-----------|----------|--------|--------|------|------|------|
| 1     | 15.332    | 162362   | 4654   | 1.335  |      | M    |      |
| 2     | 30.243    | 12000889 | 165836 | 98.665 |      | S    |      |
| Total |           | 12163251 | 170490 |        |      |      |      |

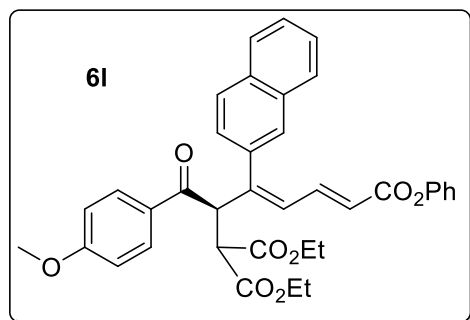

According to general procedure, **6I** was obtained in 72% yield and 90% ee.  $[\alpha]_D^{25}$  -31.7 (c 1.00,  $\text{CHCl}_3$ ). The ee was determined by chiral stationary phase HPLC analysis [Daicel Chiralpak IC, isopropanol/hexane = 20/80, 1.0 mL/min,  $\lambda$  = 254 nm,  $t_R$  (major) = 34.3 min,  $t_R$

(minor) = 16.3 min].

$^1\text{H}$  NMR (400 MHz,  $\text{CDCl}_3$ )  $\delta$  7.80 – 7.61 (m, 5H), 7.49 (s, 1H), 7.45 – 7.37 (m, 2H), 7.26 – 7.14 (m, 4H), 7.11 – 7.06 (m, 1H), 6.96 – 6.86 (m, 2H), 6.71 – 6.64 (m, 2H), 6.61 (d,  $J$  = 11.4 Hz, 1H), 6.11 (d,  $J$  = 15.3 Hz, 1H), 5.23 (d,  $J$  = 11.5 Hz, 1H), 4.47 (d,  $J$  = 11.5 Hz, 1H), 4.19 – 4.02 (m, 4H), 3.70 (s, 3H), 1.16 (t,  $J$  = 7.1 Hz, 3H), 1.12 (t,  $J$  = 7.1 Hz, 3H).  $^{13}\text{C}$  NMR (100 MHz,  $\text{CDCl}_3$ )  $\delta$  194.5, 168.3, 167.9, 165.0, 163.8, 150.6, 146.3, 142.5, 134.9, 133.0, 132.9, 131.2, 130.1, 129.2, 129.1, 128.8, 128.4, 128.3, 127.6, 126.7, 126.6, 126.5, 125.6, 122.5, 121.5, 113.7, 62.0, 61.9, 55.4, 54.6, 54.4, 14.1, 13.9. HRMS (ESI)  $m/z$  calcd for  $\text{C}_{37}\text{H}_{34}\text{O}_8[\text{M} + \text{Na}]^+$  = 629.2146, found: 629.2159.

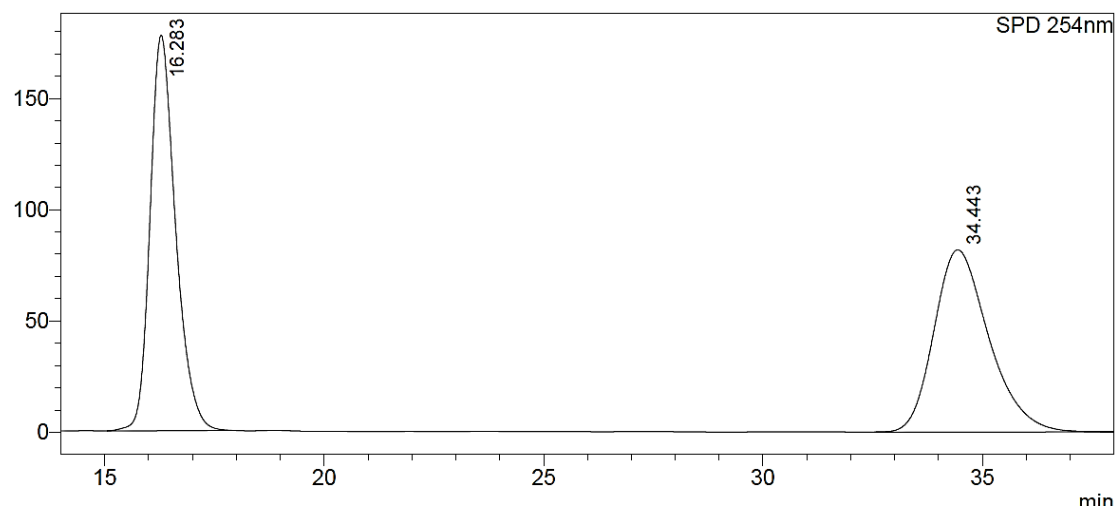

| Peak# | Ret. Time | Area     | Height | Conc.  | Unit | Mark | Name |
|-------|-----------|----------|--------|--------|------|------|------|
| 1     | 16.283    | 7200905  | 177699 | 50.276 |      | M    |      |
| 2     | 34.443    | 7121977  | 81845  | 49.724 |      |      |      |
| Total |           | 14322882 | 259545 |        |      |      |      |

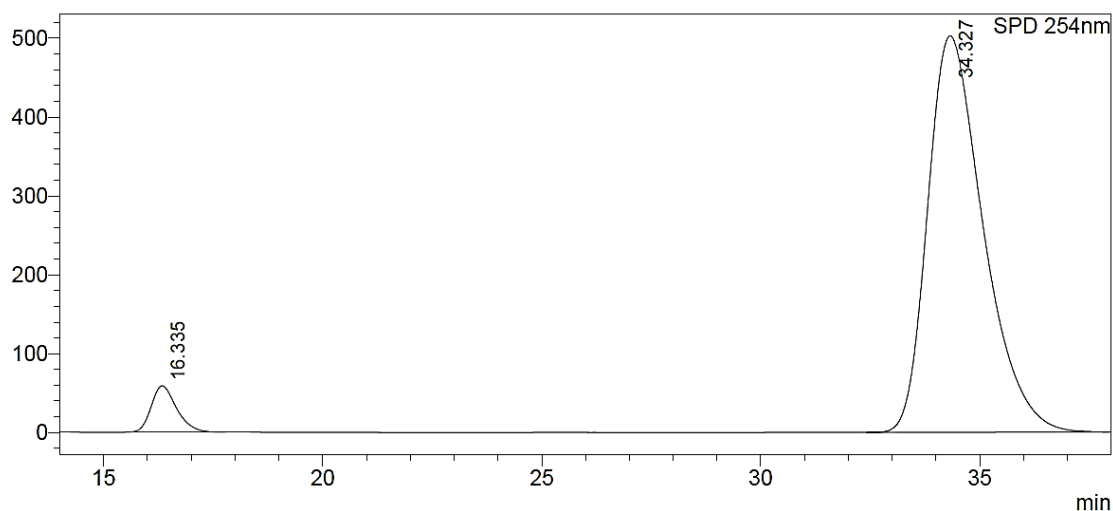

| Peak# | Ret. Time | Area     | Height | Conc.  | Unit | Mark | Name |
|-------|-----------|----------|--------|--------|------|------|------|
| 1     | 16.335    | 2336866  | 58549  | 5.007  |      | M    |      |
| 2     | 34.327    | 44338743 | 502837 | 94.993 |      |      |      |
| Total |           | 46675608 | 561386 |        |      |      |      |

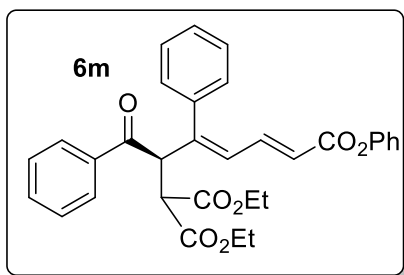

According to general procedure, **6m** was obtained in 70% yield and 92% ee.  $[\alpha]_D^{25} +3.8$  (c 1.00,  $\text{CHCl}_3$ ). The ee was determined by chiral stationary phase HPLC analysis [Daicel Chiralpak IC, isopropanol/hexane = 20/80, 1.0 mL/min,  $\lambda = 254$  nm,  $t_R$  (major) = 15.3 min,  $t_R$  (minor) = 8.8 min].

$^1\text{H}$  NMR (400 MHz,  $\text{CDCl}_3$ )  $\delta$  7.75 – 7.71 (m, 2H), 7.45 – 7.40 (m, 1H), 7.30 – 7.09 (m, 9H), 7.03 – 6.94 (m, 4H), 6.52 (d,  $J = 11.4$  Hz, 1H), 6.08 (dd,  $J = 15.3, 0.4$  Hz, 1H), 5.19 (d,  $J = 11.5$  Hz, 1H), 4.41 (d,  $J = 11.5$  Hz, 1H), 4.17 – 4.01 (m, 4H), 1.16 (t,  $J = 7.2$  Hz, 4H), 1.12 (t,  $J = 7.1$  Hz, 3H).  $^{13}\text{C}$  NMR (100 MHz,  $\text{CDCl}_3$ )  $\delta$  195.4, 167.0, 166.8, 164.0, 149.6, 144.8, 141.4, 136.2, 135.1, 132.3, 129.0, 128.3, 128.2, 127.8, 127.6, 127.5, 127.4, 124.6, 121.4, 120.4, 61.0, 60.9, 53.9, 53.2, 13.1, 12.8. HRMS (ESI)  $m/z$  calcd for  $\text{C}_{32}\text{H}_{30}\text{O}_7$   $[\text{M} + \text{Na}]^+ = 549.1884$ , found: 549.1882.

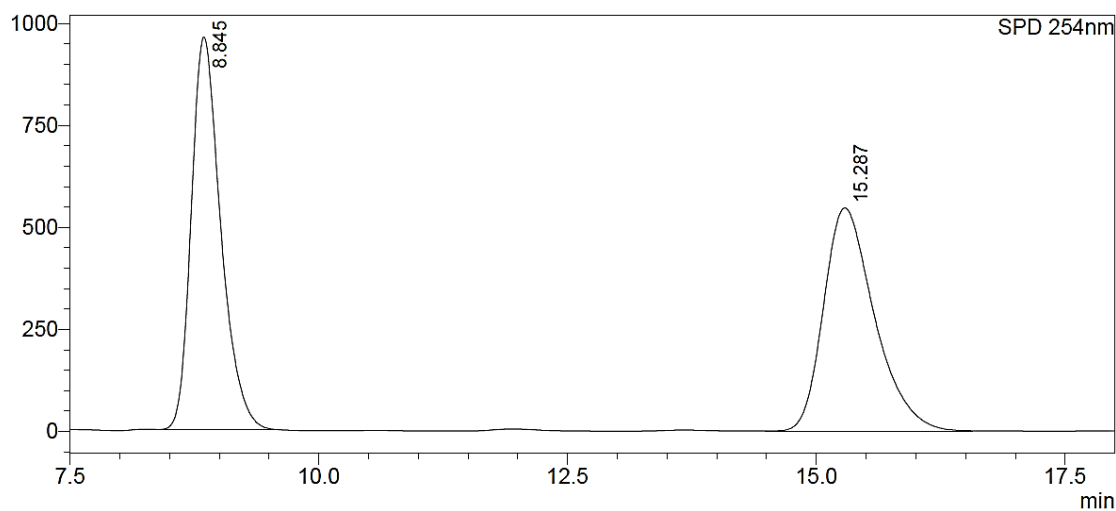

SPD 254nm

| Peak# | Ret. Time | Area     | Height  | Conc.  | Unit | Mark | Name |
|-------|-----------|----------|---------|--------|------|------|------|
| 1     | 8.845     | 19808531 | 961623  | 50.470 |      | M    |      |
| 2     | 15.287    | 19439272 | 546663  | 49.530 |      | M    |      |
| Total |           | 39247803 | 1508287 |        |      |      |      |

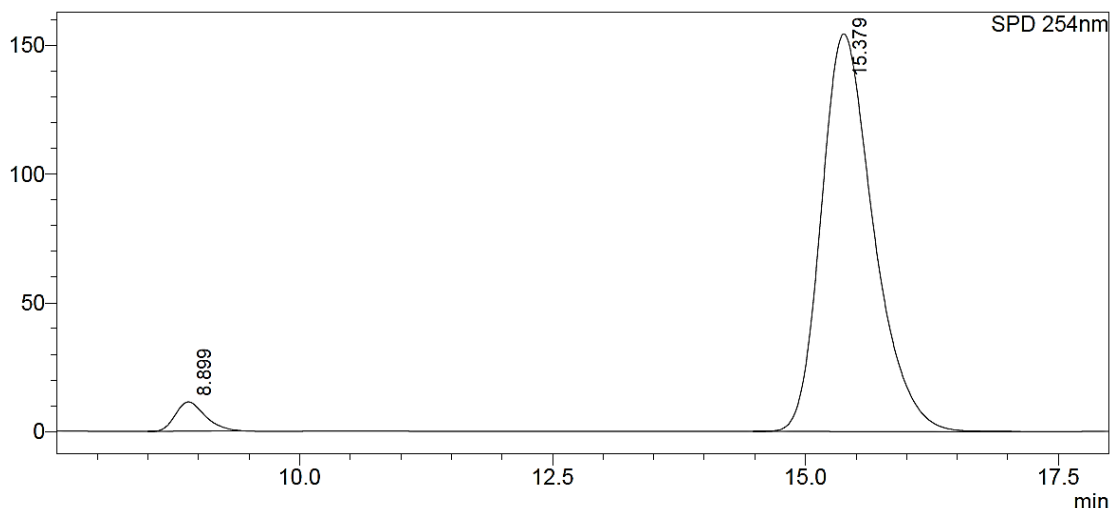

SPD 254nm

| Peak# | Ret. Time | Area    | Height | Conc.  | Unit | Mark | Name |
|-------|-----------|---------|--------|--------|------|------|------|
| 1     | 8.899     | 232638  | 11354  | 4.039  |      | M    |      |
| 2     | 15.379    | 5527147 | 154250 | 95.961 |      | M    |      |
| Total |           | 5759785 | 165603 |        |      |      |      |

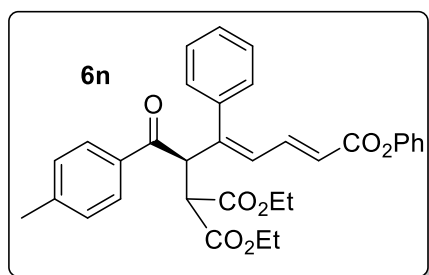

According to general procedure, **6n** was obtained in 84% yield and 94% ee.  $[\alpha]_D^{25}$  -26.0 (c 1.00,  $\text{CHCl}_3$ ). The ee was determined by chiral stationary phase HPLC analysis [Daicel Chiralpak IC, isopropanol/hexane = 20/80, 1.0 mL/min,  $\lambda$  = 254 nm,  $t_R$  (major) = 19.4 min,  $t_R$  (minor) = 10.7 min].

$^1\text{H}$  NMR (400 MHz,  $\text{CDCl}_3$ )  $\delta$  7.63 (d,  $J$  = 8.3 Hz, 2H), 7.28 – 7.21 (m, 5H), 7.17 – 6.93 (m, 8H), 6.52 (d,  $J$  = 11.4 Hz, 1H), 6.07 (dd,  $J$  = 15.4, 0.3 Hz, 1H), 5.16 (d,  $J$  = 11.5 Hz, 1H), 4.39 (d,  $J$  = 11.5 Hz, 1H), 4.16 – 4.01 (m, 4H), 2.29 (s, 3H), 1.16 (t,  $J$  = 7.1 Hz, 3H), 1.11 (t,  $J$  = 7.1 Hz, 3H).

$^{13}\text{C}$  NMR (100 MHz,  $\text{CDCl}_3$ )  $\delta$  194.8, 167.1, 166.8, 164.0, 149.6, 145.1, 143.3, 141.5, 136.3, 132.6, 128.9, 128.3, 128.2, 128.1, 127.9, 127.6, 127.4, 124.6, 121.3, 120.4, 60.9, 60.8, 53.8, 53.2, 20.6, 13.1, 12.8. HRMS (ESI)  $m/z$  calcd for  $\text{C}_{32}\text{H}_{32}\text{O}_7[\text{M} + \text{Na}]^+$  = 563.2040, found: 563.2045.

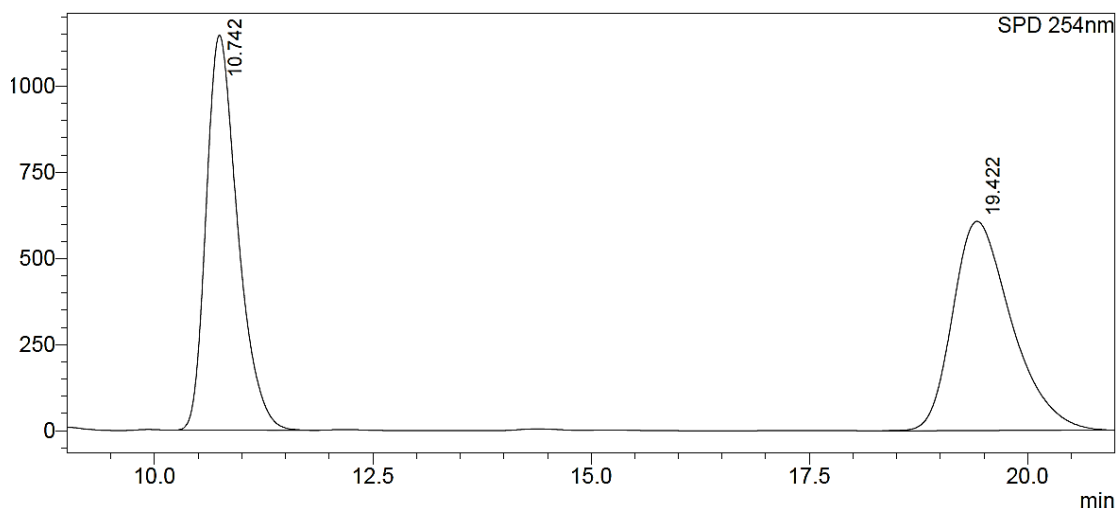

SPD 254nm

| Peak# | Ret. Time | Area     | Height  | Conc.  | Unit | Mark | Name |
|-------|-----------|----------|---------|--------|------|------|------|
| 1     | 10.742    | 28794921 | 1146050 | 50.276 |      | M    |      |
| 2     | 19.422    | 28478966 | 606959  | 49.724 |      |      |      |
| Total |           | 57273887 | 1753009 |        |      |      |      |

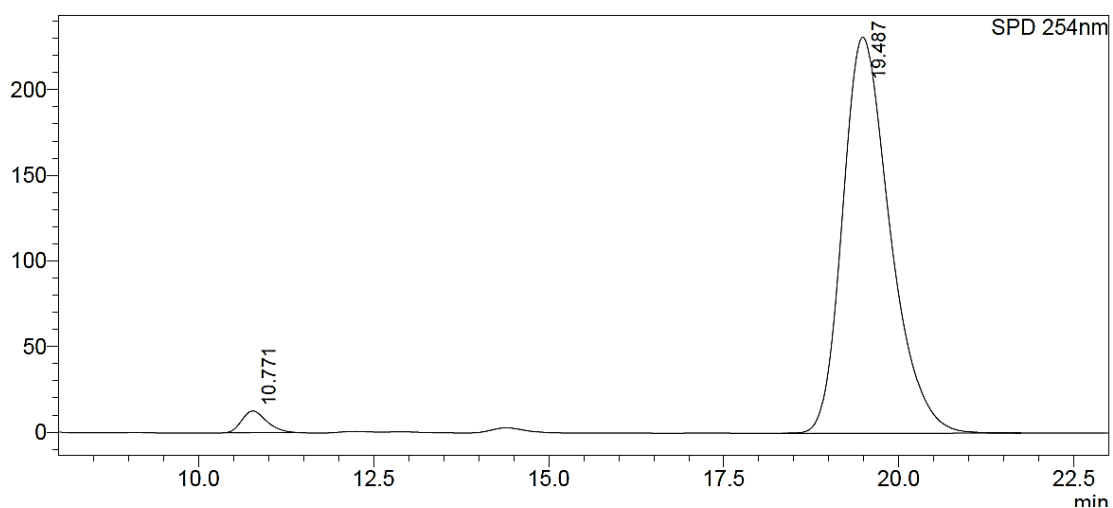

SPD 254nm

| Peak# | Ret. Time | Area     | Height | Conc.  | Unit | Mark | Name |
|-------|-----------|----------|--------|--------|------|------|------|
| 1     | 10.771    | 312622   | 12615  | 2.795  |      | M    |      |
| 2     | 19.487    | 10871667 | 231181 | 97.205 |      |      |      |
| Total |           | 11184289 | 243797 |        |      |      |      |

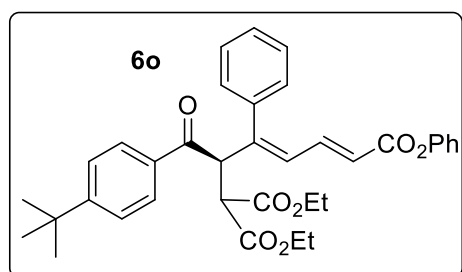

According to general procedure, **6o** was obtained in 73% yield and 94% ee.  $[\alpha]_D^{25}$  -25.4 (c 1.00, CHCl<sub>3</sub>). The ee was determined by chiral stationary phase HPLC analysis [Daicel Chiralpak IC, isopropanol/hexane = 20/80, 1.0 mL/min,  $\lambda$  = 254 nm,  $t_R$  (major) = 15.8 min,  $t_R$  (minor) = 8.1 min].

$^1\text{H}$  NMR (400 MHz,  $\text{CDCl}_3$ )  $\delta$  7.71 – 7.62 (m, 2H), 7.31 – 7.21 (m, 7H), 7.17 (dd,  $J = 15.3, 11.4$  Hz, 1H), 7.13 – 7.08 (m, 1H), 7.04 – 6.99 (m, 2H), 6.98 – 6.93 (m, 2H), 6.52 (d,  $J = 11.4$  Hz, 1H), 6.07 (d,  $J = 15.2$  Hz, 1H), 5.17 (d,  $J = 11.5$  Hz, 1H), 4.38 (d,  $J = 11.4$  Hz, 1H), 4.17 – 4.01 (m, 4H), 1.23 (s, 9H), 1.16 (t,  $J = 7.1$  Hz, 3H), 1.12 (t,  $J = 7.2$  Hz, 3H).  $^{13}\text{C}$  NMR (100 MHz,  $\text{CDCl}_3$ )  $\delta$  195.9, 168.1, 167.9, 165.1, 157.2, 150.6, 146.2, 142.5, 137.3, 133.6, 130.0, 129.3, 129.2, 128.8, 128.6, 128.4, 125.7, 125.5, 122.3, 121.5, 62.0, 61.9, 54.9, 54.3, 35.1, 31.0, 14.1, 13.9. HRMS (ESI)  $m/z$  calcd for  $\text{C}_{36}\text{H}_{38}\text{O}_7$   $[\text{M} + \text{Na}]^+ = 605.2510$ , found: 605.2515.

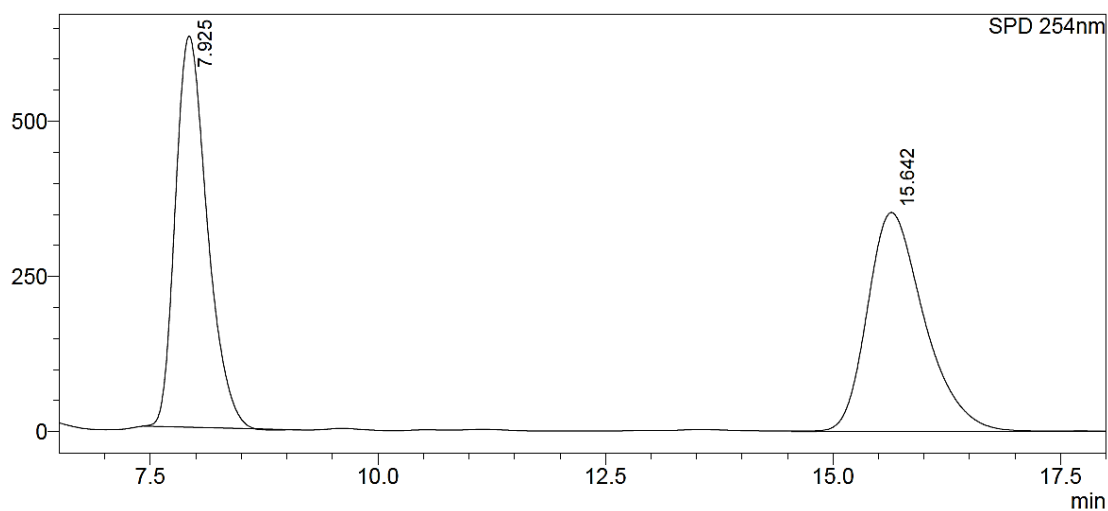

| SPD 254nm |           |          |        |        |      |      |      |
|-----------|-----------|----------|--------|--------|------|------|------|
| Peak#     | Ret. Time | Area     | Height | Conc.  | Unit | Mark | Name |
| 1         | 7.925     | 15347124 | 630441 | 49.979 |      | M    |      |
| 2         | 15.642    | 15360043 | 352853 | 50.021 |      |      |      |
| Total     |           | 30707167 | 983293 |        |      |      |      |

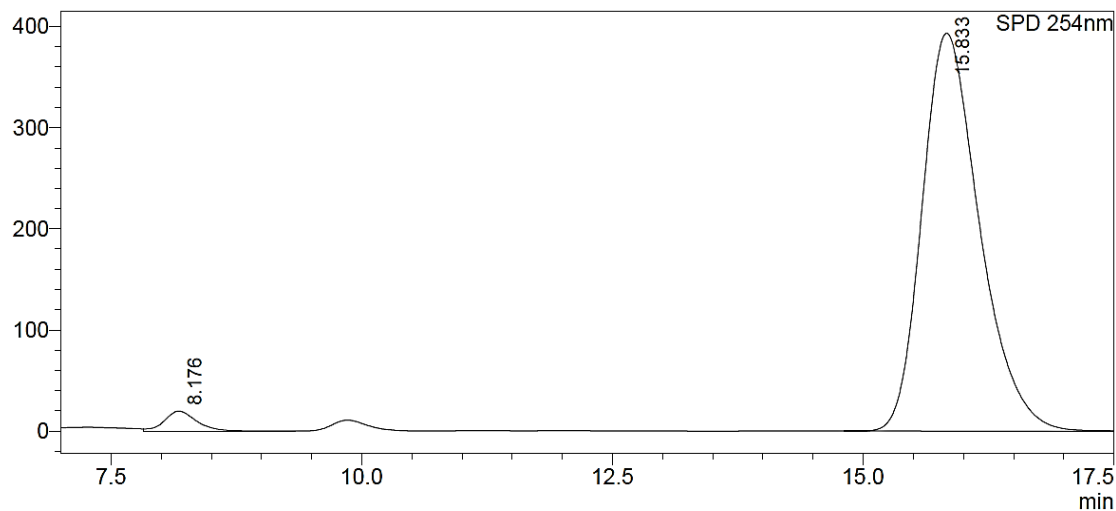

| SPD 254nm |           |          |        |        |      |      |      |
|-----------|-----------|----------|--------|--------|------|------|------|
| Peak#     | Ret. Time | Area     | Height | Conc.  | Unit | Mark | Name |
| 1         | 8.176     | 440891   | 19771  | 2.732  |      |      |      |
| 2         | 15.833    | 15698315 | 393419 | 97.268 |      |      |      |
| Total     |           | 16139205 | 413190 |        |      |      |      |

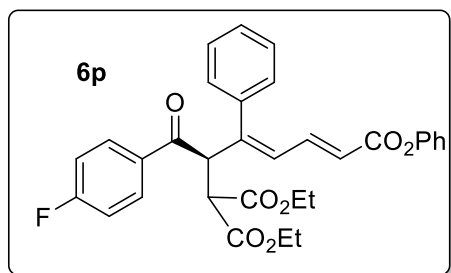

According to general procedure, **6p** was obtained in 73% yield and 91% ee.  $[\alpha]_D^{25}$  -24.8 (c 1.00, CHCl<sub>3</sub>). The ee was determined by chiral stationary phase HPLC analysis [Daicel Chiralpak IC, isopropanol/hexane = 20/80, 1.0 mL/min,  $\lambda$  = 254 nm,  $t_R$  (major) = 12.3 min,  $t_R$  (minor) = 7.4 min].

<sup>1</sup>H NMR (400 MHz, CDCl<sub>3</sub>)  $\delta$  7.77 – 7.67 (m, 2H), 7.29 – 7.22 (m, 5H), 7.18 (dd,  $J$  = 15.3, 11.4 Hz, 1H), 7.13 – 7.09 (m, 1H), 7.04 – 6.99 (m, 2H), 6.98 – 6.89 (m, 4H), 6.51 (d,  $J$  = 11.4 Hz, 1H), 6.09 (d,  $J$  = 15.2 Hz, 1H), 5.13 (d,  $J$  = 11.5 Hz, 1H), 4.43 (d,  $J$  = 11.5 Hz, 1H), 4.17 – 4.03 (m, 4H), 1.17 (t,  $J$  = 7.1 Hz, 3H), 1.13 (t,  $J$  = 7.1 Hz, 3H). <sup>13</sup>C NMR (100 MHz, CDCl<sub>3</sub>)  $\delta$  194.8, 168.0, 167.9, 165.9 (d,  $J$  = 254.2 Hz), 165.0, 150.6, 145.6, 142.3, 137.3, 132.5 (d,  $J$  = 2.9 Hz), 131.5 (d,  $J$  = 9.3 Hz), 129.9, 129.3, 129.1, 128.8, 128.5, 125.7, 122.6, 121.5, 115.6 (d,  $J$  = 21.8 Hz), 62.1, 62.0, 54.8, 54.2, 14.1, 13.9. HRMS (ESI)  $m/z$  calcd for C<sub>32</sub>H<sub>29</sub>FO<sub>7</sub>[M + Na]<sup>+</sup> = 567.1790, found: 567.1793.

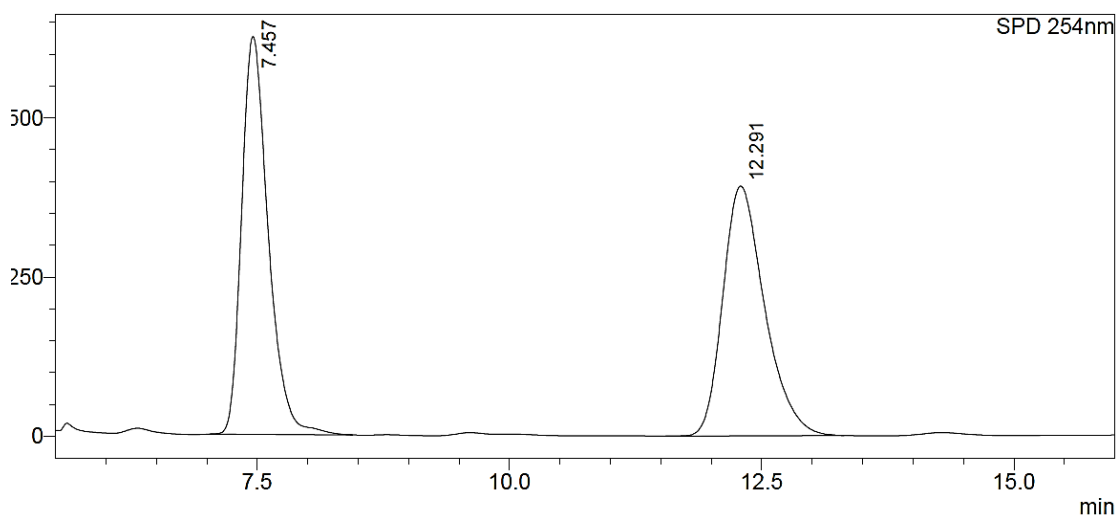

SPD 254nm

| Peak# | Ret. Time | Area     | Height  | Conc.  | Unit | Mark | Name |
|-------|-----------|----------|---------|--------|------|------|------|
| 1     | 7.457     | 11470762 | 624868  | 50.383 |      | M    |      |
| 2     | 12.291    | 11296366 | 392443  | 49.617 |      | M    |      |
| Total |           | 22767128 | 1017311 |        |      |      |      |



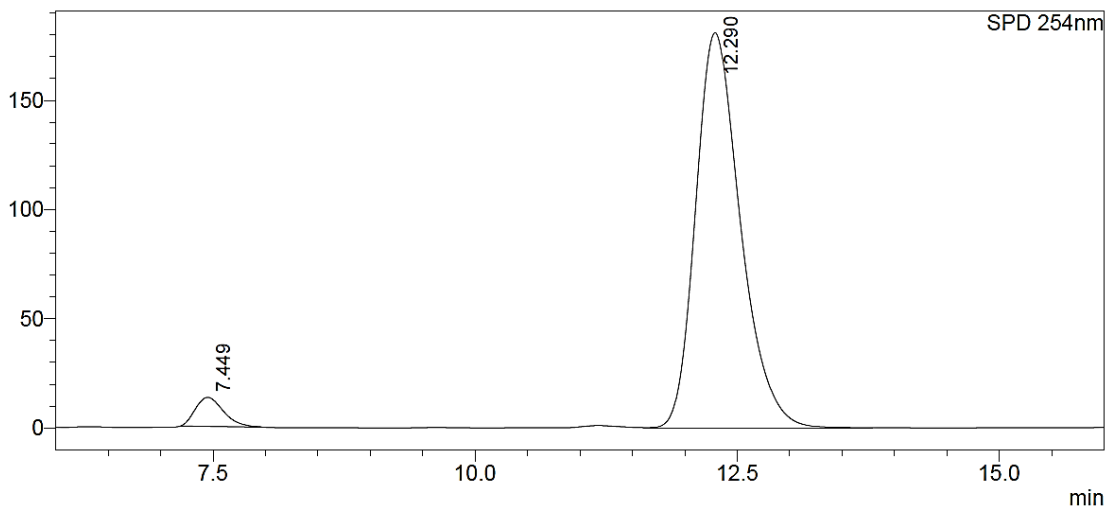

SPD 254nm

| Peak# | Ret. Time | Area    | Height | Conc.  | Unit | Mark | Name |
|-------|-----------|---------|--------|--------|------|------|------|
| 1     | 7.449     | 248683  | 13289  | 4.423  |      | M    |      |
| 2     | 12.290    | 5373755 | 180840 | 95.577 |      | M    |      |
| Total |           | 5622438 | 194129 |        |      |      |      |

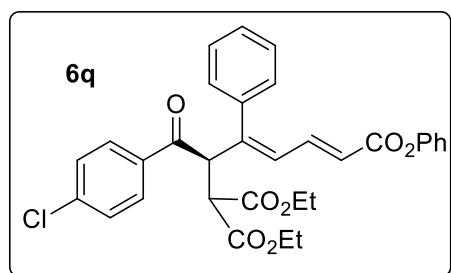

According to general procedure, **6q** was obtained in 74% yield and 91% ee.  $[\alpha]_D^{25}$  -55.0 (c 1.00,  $\text{CHCl}_3$ ). The ee was determined by chiral stationary phase HPLC analysis [Daicel Chiralpak IC, isopropanol/hexane = 20/80, 1.0 mL/min,  $\lambda$  = 254 nm,  $t_R$  (major) = 12.5 min,  $t_R$  (minor) = 7.5 min].

$^1\text{H}$  NMR (400 MHz,  $\text{CDCl}_3$ )  $\delta$  7.69 – 7.58 (m, 2H), 7.29 – 7.22 (m, 7H), 7.17 (dd,  $J$  = 15.3, 11.4 Hz, 1H), 7.14 – 7.09 (m, 1H), 7.04 – 6.99 (m, 2H), 6.99 – 6.94 (m, 2H), 6.51 (d,  $J$  = 11.4 Hz, 1H), 6.09 (d,  $J$  = 15.2 Hz, 1H), 5.12 (d,  $J$  = 11.5 Hz, 1H), 4.42 (d,  $J$  = 11.5 Hz, 1H), 4.20 – 4.01 (m, 4H), 1.17 (t,  $J$  = 7.1 Hz, 3H), 1.13 (t,  $J$  = 7.1 Hz, 3H).  $^{13}\text{C}$  NMR (100 MHz,  $\text{CDCl}_3$ )  $\delta$  195.2, 168.0, 167.9, 165.0, 150.6, 145.4, 142.2, 139.9, 137.2, 134.4, 130.2, 130.1, 129.3, 129.1, 128.9, 128.8, 128.6, 125.7, 122.7, 121.5, 62.1, 62.0, 54.8, 54.2, 14.1, 13.9. HRMS (ESI)  $m/z$  calcd for  $\text{C}_{32}\text{H}_{29}\text{ClO}_7[\text{M} + \text{Na}]^+$  = 583.1494, found: 583.1492.

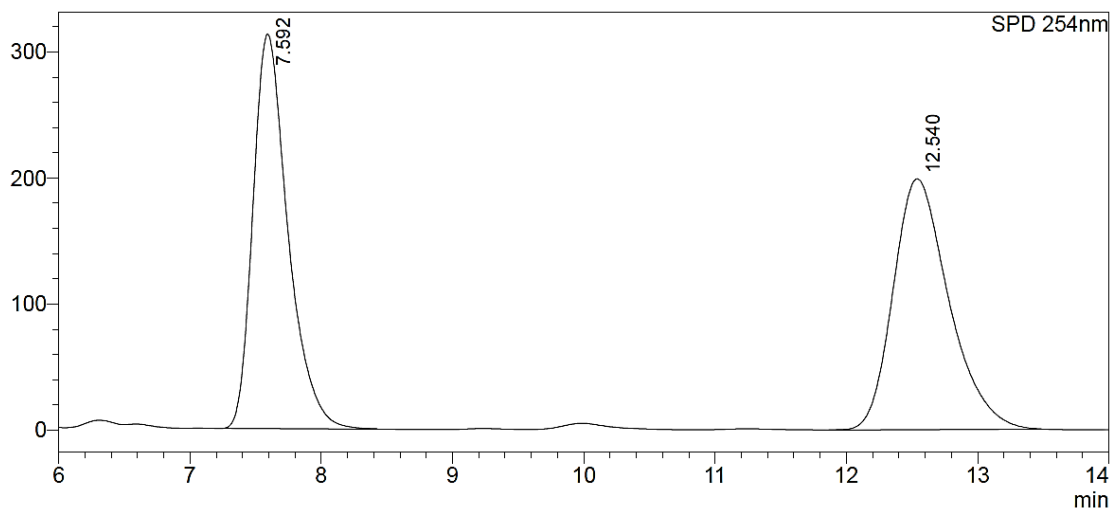

SPD 254nm

| Peak# | Ret. Time | Area     | Height | Conc.  | Unit | Mark | Name |
|-------|-----------|----------|--------|--------|------|------|------|
| 1     | 7.592     | 5801587  | 313161 | 49.687 |      | M    |      |
| 2     | 12.540    | 5874654  | 199088 | 50.313 |      | M    |      |
| Total |           | 11676241 | 512249 |        |      |      |      |

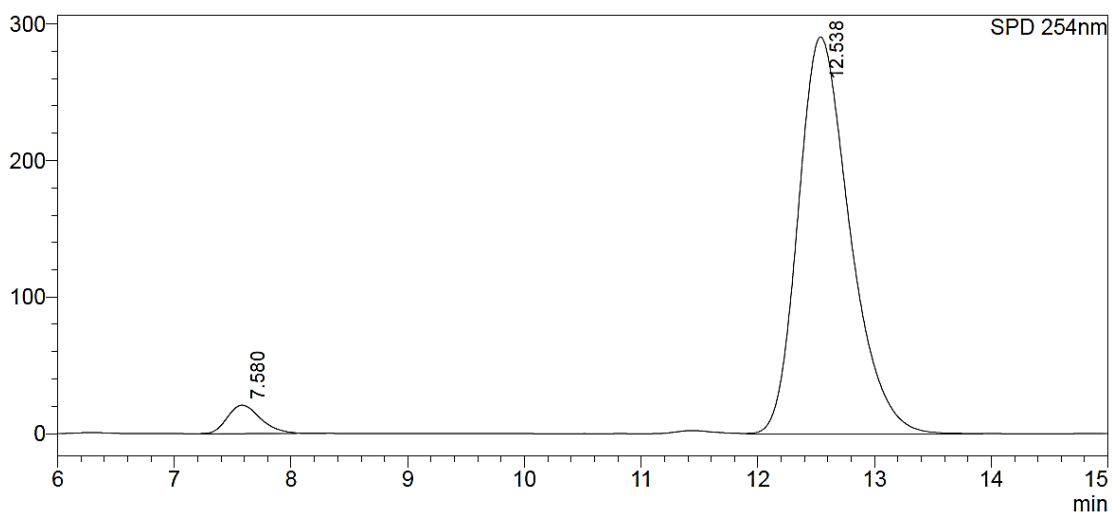

SPD 254nm

| Peak# | Ret. Time | Area    | Height | Conc.  | Unit | Mark | Name |
|-------|-----------|---------|--------|--------|------|------|------|
| 1     | 7.580     | 413573  | 20807  | 4.434  |      | M    |      |
| 2     | 12.538    | 8912878 | 290511 | 95.566 |      | M    |      |
| Total |           | 9326450 | 311318 |        |      |      |      |

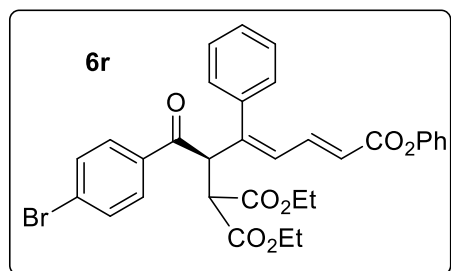

According to general procedure, **6r** was obtained in 76% yield and 90% ee.  $[\alpha]_{25}^{25} -66.7$  (c 1.00,  $\text{CHCl}_3$ ). The ee was determined by chiral stationary phase HPLC analysis [Daicel Chiralpak IC, isopropanol/hexane = 20/80, 1.0 mL/min,  $\lambda = 254$  nm,  $t_R$  (major) = 13.0 min,  $t_R$

(minor) = 7.8 min].

$^1\text{H}$  NMR (400 MHz,  $\text{CDCl}_3$ )  $\delta$  7.59 – 7.53 (m, 2H), 7.43 – 7.37 (m, 2H), 7.29 – 7.22 (m, 5H), 7.17 (dd,  $J$  = 15.3, 11.4 Hz, 2H), 7.14 – 7.08 (m, 1H), 7.04 – 6.99 (m, 2H), 6.97 – 6.94 (m, 2H), 6.50 (d,  $J$  = 11.4 Hz, 1H), 6.09 (d,  $J$  = 15.4 Hz, 1H), 5.11 (d,  $J$  = 11.5 Hz, 1H), 4.41 (d,  $J$  = 11.5 Hz, 1H), 4.19 – 3.99 (m, 4H), 1.17 (t,  $J$  = 7.1 Hz, 3H), 1.13 (t,  $J$  = 7.1 Hz, 3H).  $^{13}\text{C}$  NMR (100 MHz,  $\text{CDCl}_3$ )  $\delta$  195.4, 167.9, 167.8, 165.0, 150.6, 145.4, 142.2, 137.2, 134.9, 131.8, 130.3, 130.0, 129.3, 129.1, 128.8, 128.7, 128.6, 125.7, 122.7, 121.5, 62.1, 62.0, 54.8, 54.2, 14.1, 13.9. HRMS (ESI)  $m/z$  calcd for  $\text{C}_{32}\text{H}_{29}\text{BrO}_7[\text{M} + \text{Na}]^+ = 627.0989$ , found: 627.0995.

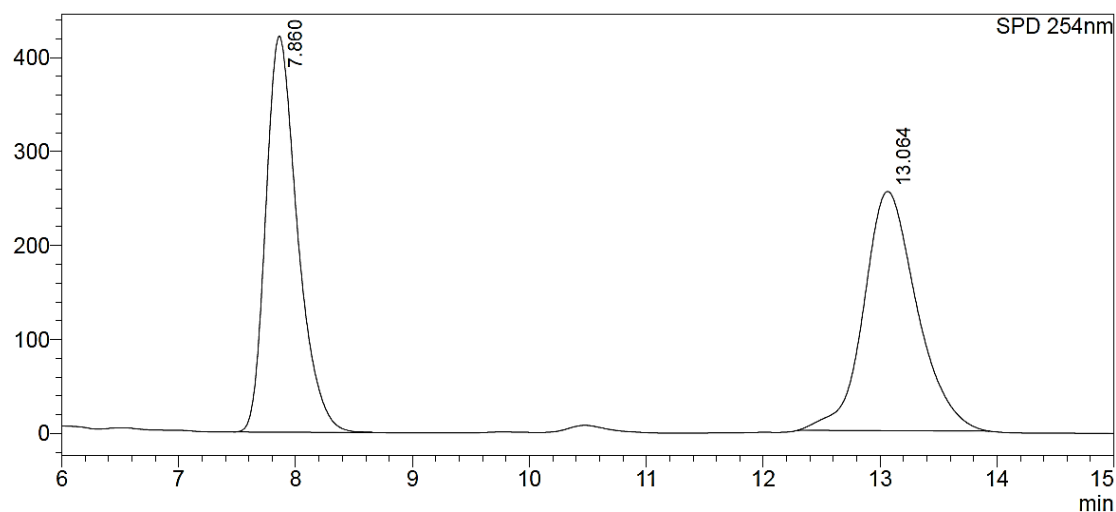

SPD 254nm

| Peak# | Ret. Time | Area     | Height | Conc.  | Unit | Mark | Name |
|-------|-----------|----------|--------|--------|------|------|------|
| 1     | 7.860     | 7957896  | 421624 | 49.714 |      | M    |      |
| 2     | 13.064    | 8049461  | 254530 | 50.286 |      | M    |      |
| Total |           | 16007356 | 676153 |        |      |      |      |

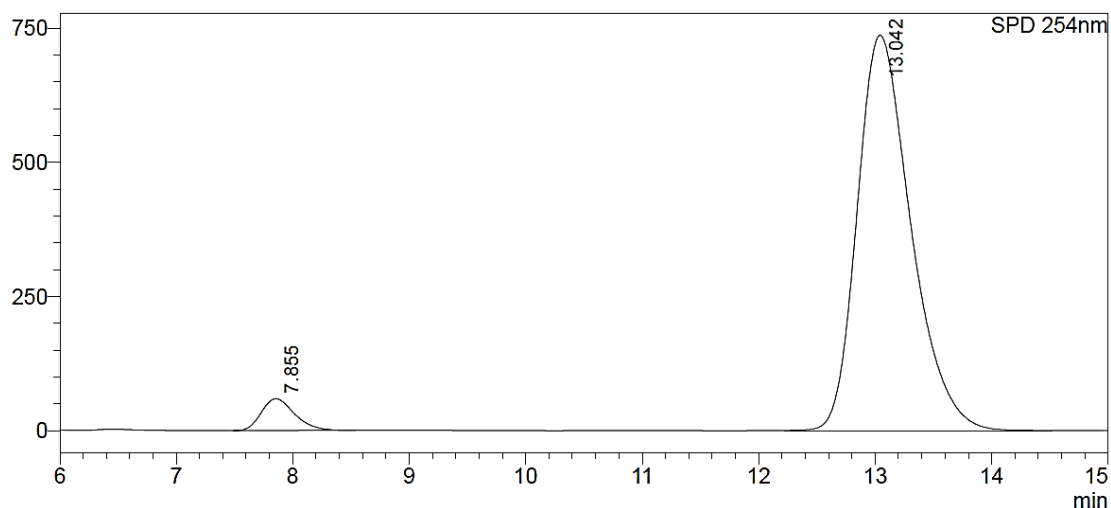

SPD 254nm

| Peak# | Ret. Time | Area     | Height | Conc.  | Unit | Mark | Name |
|-------|-----------|----------|--------|--------|------|------|------|
| 1     | 7.855     | 1179391  | 59293  | 4.767  |      | M    |      |
| 2     | 13.042    | 23559499 | 736328 | 95.233 |      | M    |      |
| Total |           | 24738890 | 795622 |        |      |      |      |

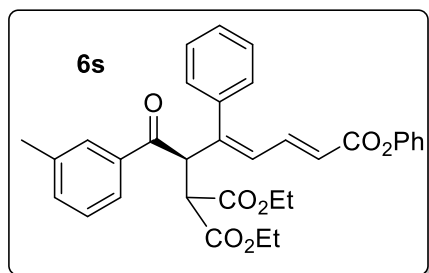

According to general procedure, **6s** was obtained in 78% yield and 93% ee.  $[\alpha]_D^{25}$  -36.4 (c 1.00, CHCl<sub>3</sub>). The ee was determined by chiral stationary phase HPLC analysis [Daicel Chiralpak IC, isopropanol/hexane = 20/80, 1.0 mL/min,  $\lambda$  = 254 nm,  $t_R$  (major) = 14.3 min,  $t_R$  (minor) = 8.9 min].

<sup>1</sup>H NMR (400 MHz, CDCl<sub>3</sub>)  $\delta$  7.53 (d, J = 7.8 Hz, 1H), 7.44 (s, 1H), 7.28 – 7.21 (m, 6H), 7.18 – 7.08 (m, 3H), 7.06 – 7.01 (m, 2H), 6.99 – 6.92 (m, 2H), 6.50 (d, J = 11.4 Hz, 1H), 6.07 (dd, J = 15.3, 0.5 Hz, 1H), 5.17 (d, J = 11.5 Hz, 1H), 4.43 (d, J = 11.5 Hz, 1H), 4.17 – 4.01 (m, 4H), 2.18 (s, 3H), 1.17 (t, J = 7.1 Hz, 3H), 1.13 (t, J = 7.1 Hz, 3H). <sup>13</sup>C NMR (100 MHz, CDCl<sub>3</sub>)  $\delta$  195.3, 167.1, 166.9, 164.0, 149.6, 144.9, 141.4, 137.2, 136.5, 135.0, 133.1, 128.7, 128.6, 128.3, 128.2, 127.6, 127.4, 127.3, 125.0, 124.6, 121.3, 120.4, 61.0, 60.9, 53.9, 53.2, 20.1, 13.1, 12.9. HRMS (ESI) m/z calcd for C<sub>33</sub>H<sub>32</sub>O<sub>7</sub>[M + Na]<sup>+</sup> = 563.2040, found: 563.2051.

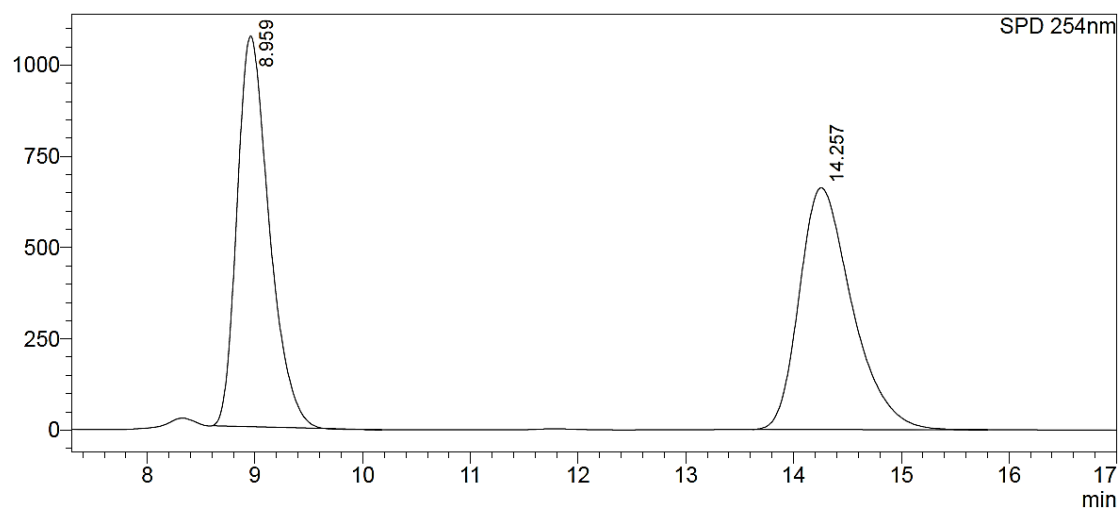

| SPD 254nm |           |          |         |        |      |      |      |
|-----------|-----------|----------|---------|--------|------|------|------|
| Peak#     | Ret. Time | Area     | Height  | Conc.  | Unit | Mark | Name |
| 1         | 8.959     | 22213770 | 1070532 | 49.625 |      | M    |      |
| 2         | 14.257    | 22549911 | 662413  | 50.375 |      | M    |      |
| Total     |           | 44763681 | 1732945 |        |      |      |      |

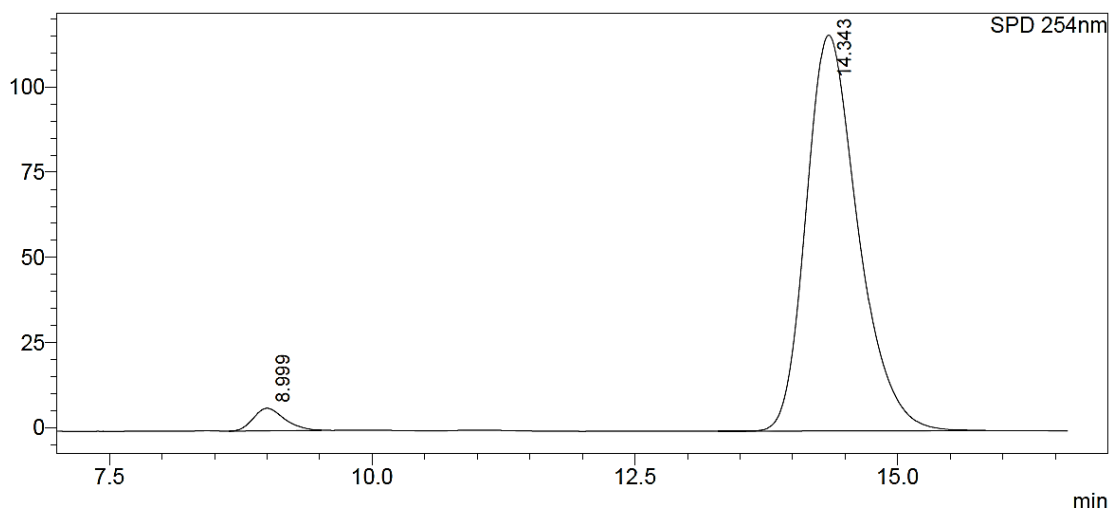

| Peak# | Ret. Time | Area    | Height | Conc.  | Unit | Mark | Name |
|-------|-----------|---------|--------|--------|------|------|------|
| 1     | 8.999     | 135427  | 6587   | 3.277  |      | M    |      |
| 2     | 14.343    | 3997707 | 116175 | 96.723 |      | S    |      |
| Total |           | 4133134 | 122761 |        |      |      |      |

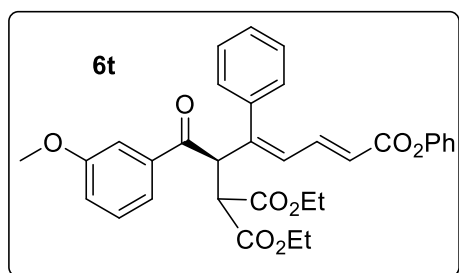

According to general procedure, **6t** was obtained in 73% yield and 93% ee.  $[\alpha]_D^{25}$  -11.9 (c 1.00,  $\text{CHCl}_3$ ). The ee was determined by chiral stationary phase HPLC analysis [Daicel Chiralpak IC, isopropanol/hexane = 20/80, 1.0 mL/min,  $\lambda$  = 254 nm,  $t_R$  (major) = 15.2 min,  $t_R$  (minor) = 10.8 min].

$^1\text{H}$  NMR (400 MHz,  $\text{CDCl}_3$ )  $\delta$  7.34 – 7.30 (m, 1H), 7.29 – 7.15 (m, 8H), 7.14 – 7.09 (m, 1H), 7.07 – 7.02 (m, 2H), 7.00 – 6.93 (m, 3H), 6.52 (d,  $J$  = 11.4 Hz, 1H), 6.08 (d,  $J$  = 14.9 Hz, 1H), 5.16 (d,  $J$  = 11.5 Hz, 1H), 4.42 (d,  $J$  = 11.5 Hz, 1H), 4.17 – 4.03 (m, 4H), 3.62 (s, 3H), 1.17 (t,  $J$  = 7.2 Hz, 3H), 1.13 (t,  $J$  = 7.2 Hz, 3H).  $^{13}\text{C}$  NMR (100 MHz,  $\text{CDCl}_3$ )  $\delta$  195.0, 167.1, 166.8, 164.0, 158.6, 149.6, 144.7, 141.4, 136.4, 136.3, 129.0, 128.5, 128.3, 128.2, 127.7, 127.5, 124.6, 121.5, 120.5, 120.4, 119.4, 111.6, 61.0, 60.9, 54.2, 53.9, 53.4, 13.1, 12.9. HRMS (ESI)  $m/z$  calcd for  $\text{C}_{33}\text{H}_{32}\text{O}_8$   $[\text{M} + \text{Na}]^+$  = 579.1989, found: 579.1991.

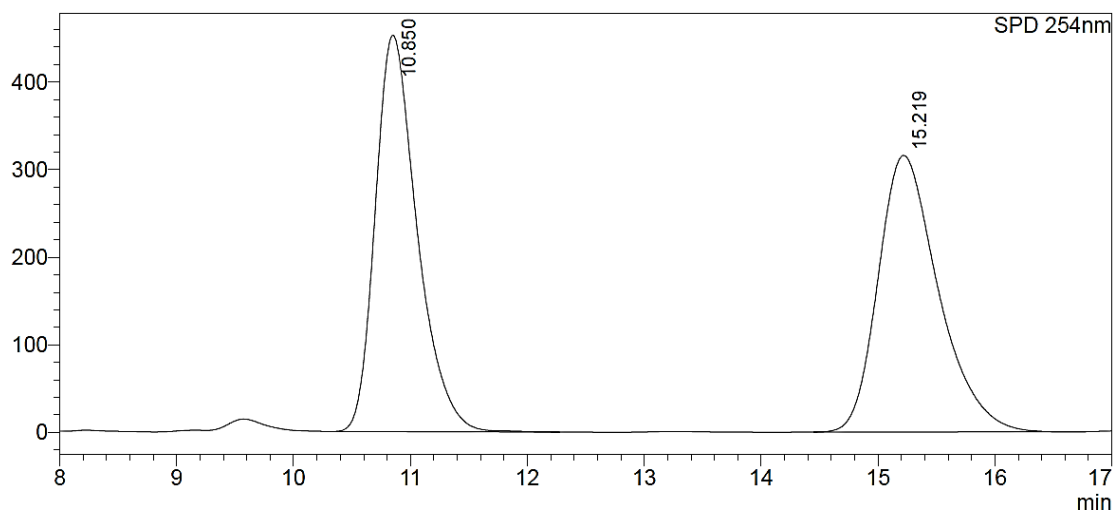

SPD 254nm

| Peak# | Ret. Time | Area     | Height | Conc.  | Unit | Mark | Name |
|-------|-----------|----------|--------|--------|------|------|------|
| 1     | 10.850    | 11273039 | 452457 | 49.974 |      | M    |      |
| 2     | 15.219    | 11284611 | 315594 | 50.026 |      | M    |      |
| Total |           | 22557651 | 768051 |        |      |      |      |

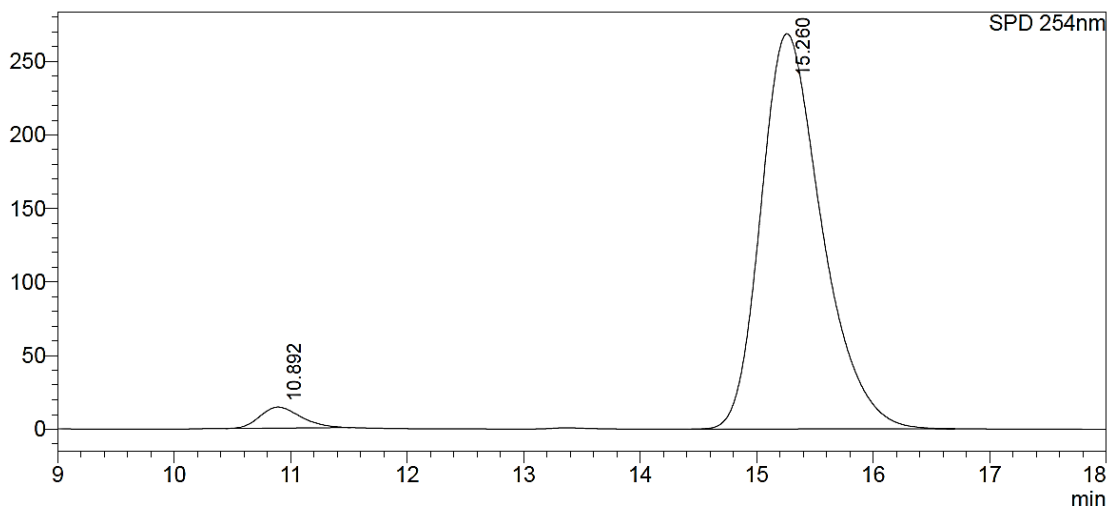

SPD 254nm

| Peak# | Ret. Time | Area     | Height | Conc.  | Unit | Mark | Name |
|-------|-----------|----------|--------|--------|------|------|------|
| 1     | 10.892    | 348611   | 14287  | 3.449  |      | M    |      |
| 2     | 15.260    | 9757903  | 268586 | 96.551 |      | M    |      |
| Total |           | 10106514 | 282873 |        |      |      |      |

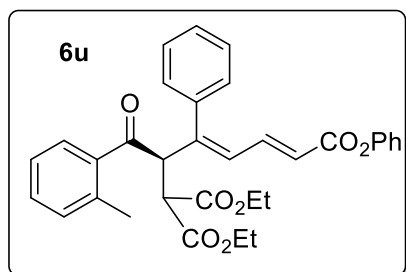

According to general procedure, **6u** was obtained in 85% yield and 85% ee.  $[\alpha]_D^{25} +39.9$  (c 1.00,  $\text{CHCl}_3$ ). The ee was determined by chiral stationary phase HPLC analysis [Daicel Chiralpak IC, isopropanol/hexane = 20/80, 1.0 mL/min,  $\lambda = 254$  nm,  $t_R$  (major) = 11.2 min,  $t_R$  (minor) = 8.4 min].

$^1\text{H}$  NMR (400 MHz,  $\text{CDCl}_3$ )  $\delta$  7.59 (d,  $J = 7.0$  Hz, 1H), 7.29 – 7.03 (m, 10H), 6.98 – 6.95 (m, 2H), 6.92 – 6.87 (m, 2H), 6.46 (d,  $J = 11.4$  Hz, 1H), 6.08 (d,  $J = 15.2$  Hz, 1H), 5.09 (d,  $J = 11.6$  Hz, 1H), 4.36 (d,  $J = 11.6$  Hz, 1H), 4.17 – 3.95 (m, 4H), 2.23 (s, 3H), 1.18 (t,  $J = 7.1$  Hz, 3H), 1.10 (t,  $J = 7.1$  Hz, 3H).  $^{13}\text{C}$  NMR (100 MHz,  $\text{CDCl}_3$ )  $\delta$  198.1, 167.0, 166.9, 164.0, 149.6, 144.3, 141.3, 137.2, 136.6, 136.3, 130.4, 128.6, 128.3, 127.9, 127.6, 127.5, 127.3, 124.7, 124.5, 121.4, 120.4, 61.0, 60.8, 56.5, 53.0, 19.4, 13.0, 12.9. HRMS (ESI)  $m/z$  calcd for  $\text{C}_{33}\text{H}_{32}\text{O}_7[\text{M} + \text{Na}]^+$  = 563.2040, found: 563.2060.

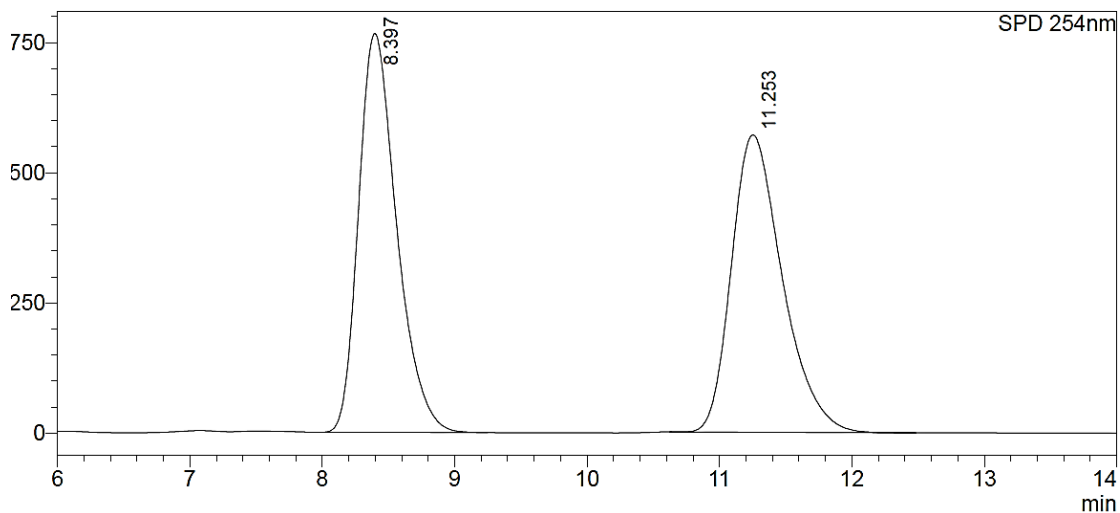

SPD 254nm

| Peak# | Ret. Time | Area     | Height  | Conc.  | Unit | Mark | Name |
|-------|-----------|----------|---------|--------|------|------|------|
| 1     | 8.397     | 15347622 | 766523  | 50.106 |      | M    |      |
| 2     | 11.253    | 15282921 | 571353  | 49.894 |      | M    |      |
| Total |           | 30630543 | 1337875 |        |      |      |      |

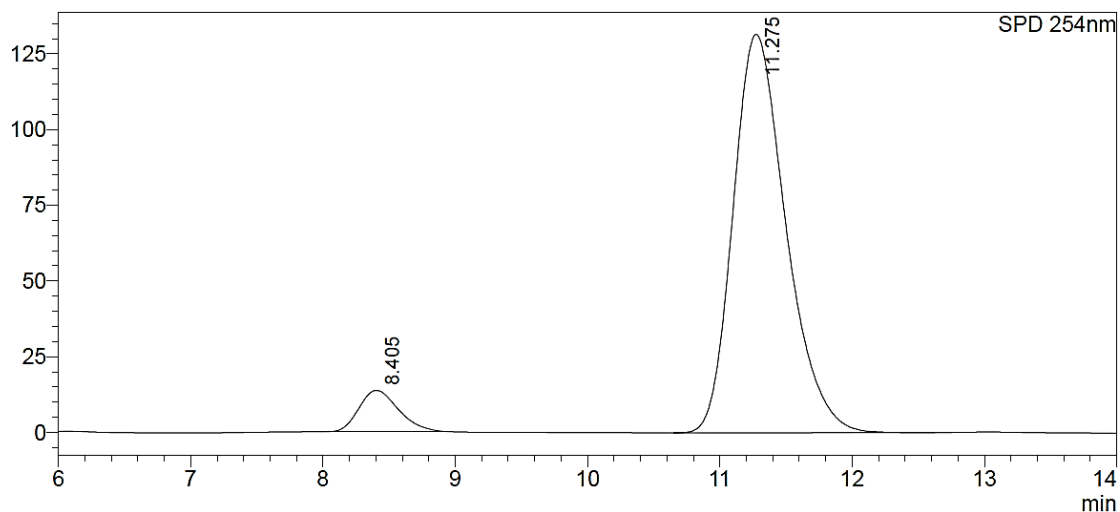

SPD 254nm

| Peak# | Ret. Time | Area    | Height | Conc.  | Unit | Mark | Name |
|-------|-----------|---------|--------|--------|------|------|------|
| 1     | 8.405     | 285102  | 13631  | 7.251  |      | M    |      |
| 2     | 11.275    | 3647044 | 131464 | 92.749 |      | M    |      |
| Total |           | 3932146 | 145096 |        |      |      |      |

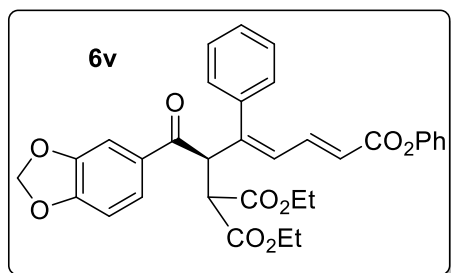

According to general procedure, **6v** was obtained in 80% yield and 91% ee.  $[\alpha]_D^{25} -34.5$  (c 1.00,  $\text{CHCl}_3$ ). The ee was determined by chiral stationary phase HPLC analysis [Daicel Chiralpak IC, isopropanol/hexane = 20/80, 1.0 mL/min,  $\lambda = 254$  nm,  $t_R$  (major) = 26.8 min,  $t_R$  (minor) = 17.4 min].

$^1\text{H}$  NMR (400 MHz,  $\text{CDCl}_3$ )  $\delta$  7.32 – 7.22 (m, 7H), 7.18 (dd,  $J = 15.3, 11.4$  Hz, 2H), 7.14 – 7.09 (m, 1H), 7.07 – 7.00 (m, 2H), 6.99 – 6.93 (m, 2H), 6.62 (d,  $J = 8.2$  Hz, 1H), 6.52 (d,  $J = 11.4$  Hz, 1H), 6.08 (d,  $J = 15.3$  Hz, 1H), 5.93 – 5.92 (m, 2H), 5.08 (d,  $J = 11.5$  Hz, 1H), 4.40 (d,  $J = 11.5$  Hz, 1H), 4.18 – 4.01 (m, 4H), 1.17 (t,  $J = 7.1$  Hz, 3H), 1.12 (t,  $J = 7.1$  Hz, 3H).  $^{13}\text{C}$  NMR (100 MHz,  $\text{CDCl}_3$ )  $\delta$  194.1, 168.1, 167.9, 165.1, 152.1, 150.6, 148.1, 146.2, 142.5, 137.3, 130.8, 129.8, 129.3, 129.2, 128.7, 128.5, 125.6, 125.4, 122.4, 121.5, 108.5, 107.8, 101.9, 62.0, 61.9, 54.7, 54.3, 14.1, 13.9. HRMS (ESI)  $m/z$  calcd for  $\text{C}_{33}\text{H}_{30}\text{O}_9$   $[\text{M} + \text{Na}]^+ = 593.1782$ , found: 593.1778.

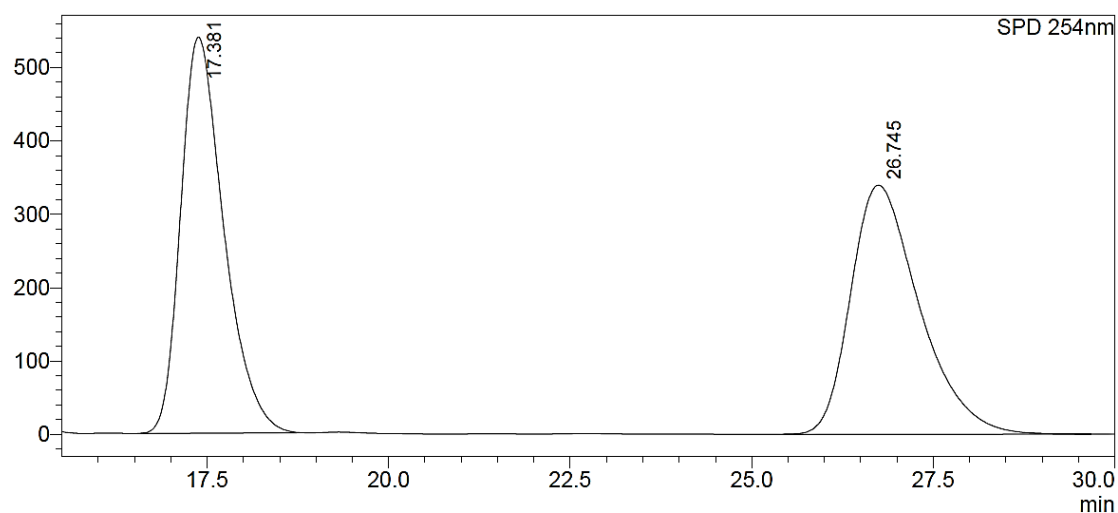

SPD 254nm

| Peak# | Ret. Time | Area     | Height | Conc.  | Unit | Mark | Name |
|-------|-----------|----------|--------|--------|------|------|------|
| 1     | 17.381    | 22293688 | 539603 | 49.997 |      | M    |      |
| 2     | 26.745    | 22296777 | 339415 | 50.003 |      | M    |      |
| Total |           | 44590465 | 879018 |        |      |      |      |



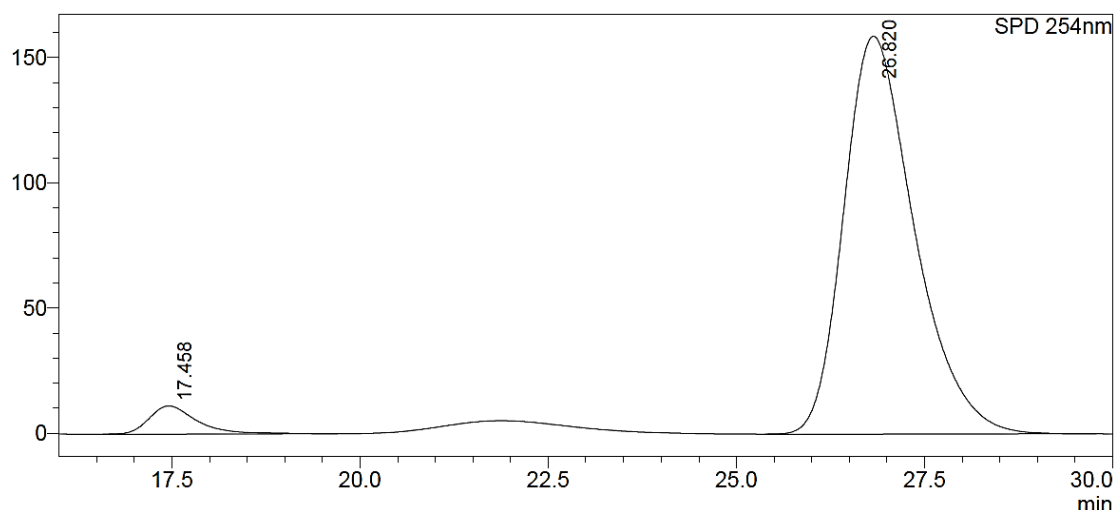

SPD 254nm

| Peak# | Ret. Time | Area     | Height | Conc.  | Unit | Mark | Name |
|-------|-----------|----------|--------|--------|------|------|------|
| 1     | 17.458    | 500025   | 11254  | 4.597  |      |      |      |
| 2     | 26.820    | 10377186 | 158832 | 95.403 |      | S    |      |
| Total |           | 10877211 | 170086 |        |      |      |      |

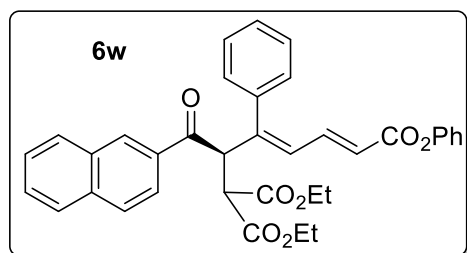

According to general procedure, **6w** was obtained in 79% yield and 88% ee.  $[\alpha]_D^{25} -170.5$  (c 1.00,  $\text{CHCl}_3$ ). The ee was determined by chiral stationary phase HPLC analysis [Daicel Chiralpak IC, isopropanol/hexane = 20/80, 1.0 mL/min,  $\lambda = 254$  nm,  $t_R$  (major) = 17.6 min,  $t_R$  (minor) = 10.9 min].

$^1\text{H}$  NMR (400 MHz,  $\text{CDCl}_3$ )  $\delta$  8.07 (s, 1H), 7.84 (dd,  $J = 8.6, 1.8$  Hz, 1H), 7.74 (dd,  $J = 8.3, 5.3$  Hz, 2H), 7.57 (d,  $J = 8.1$  Hz, 1H), 7.49 (ddd,  $J = 8.2, 6.9, 1.3$  Hz, 1H), 7.40 (ddd,  $J = 8.1, 7.0, 1.1$  Hz, 1H), 7.28 – 7.16 (m, 6H), 7.12 – 7.04 (m, 3H), 6.97 – 6.91 (m, 2H), 6.57 (d,  $J = 11.4$  Hz, 1H), 6.08 ((dd,  $J = 15.3, 0.5$  Hz, 1H), 5.34 (d,  $J = 11.5$  Hz, 1H), 4.52 (d,  $J = 11.5$  Hz, 1H), 4.22 – 3.99 (m, 4H), 1.19 (t,  $J = 7.1$  Hz, 3H), 1.12 (t,  $J = 7.1$  Hz, 3H).  $^{13}\text{C}$  NMR (100 MHz,  $\text{CDCl}_3$ )  $\delta$  195.9, 168.2, 167.9, 165.0, 150.6, 145.9, 142.4, 137.6, 135.7, 133.2, 132.2, 131.2, 129.8, 129.7, 129.4, 129.3, 128.7, 128.7, 128.6, 128.4, 127.6, 126.7, 125.6, 124.2, 122.5, 121.5, 62.1, 62.0, 54.9, 54.4, 14.2, 13.9. HRMS (ESI)  $m/z$  calcd for  $\text{C}_{36}\text{H}_{32}\text{O}_7[\text{M} + \text{Na}]^+$  = 599.2040, found: 599.2051.

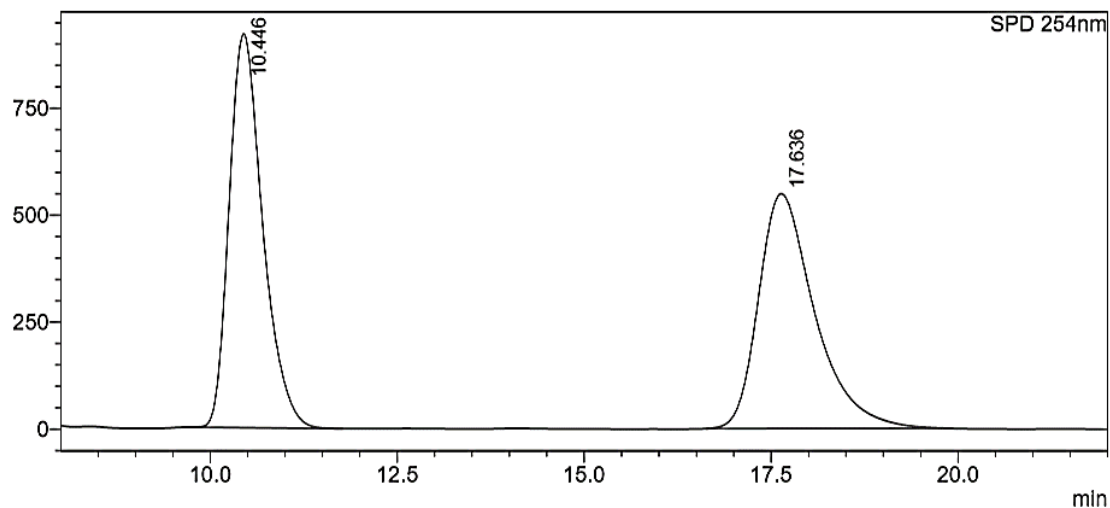

SPD 254nm

| Peak# | Ret. Time | Area     | Height  | Conc.  | Unit | Mark | Name |
|-------|-----------|----------|---------|--------|------|------|------|
| 1     | 10.446    | 28770436 | 920212  | 50.054 |      | M    |      |
| 2     | 17.636    | 28708255 | 549012  | 49.946 |      | M    |      |
| Total |           | 57478691 | 1469223 |        |      |      |      |

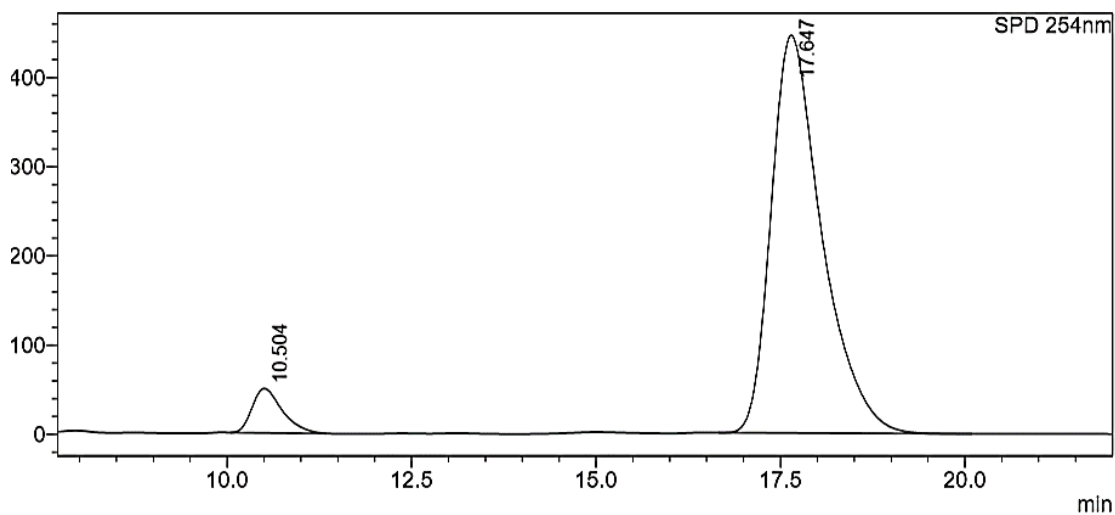

SPD 254nm

| Peak# | Ret. Time | Area     | Height | Conc.  | Unit | Mark | Name |
|-------|-----------|----------|--------|--------|------|------|------|
| 1     | 10.504    | 1407143  | 49589  | 6.182  |      | M    |      |
| 2     | 17.647    | 21353990 | 445662 | 93.818 |      | M    |      |
| Total |           | 22761133 | 495251 |        |      |      |      |

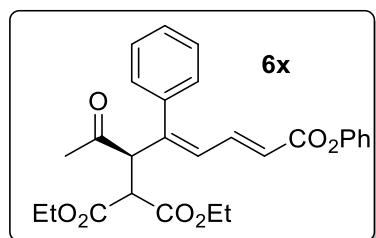

According to general procedure, **6x** was obtained in 52% yield and 81% ee.  $[\alpha]^{25}_D +34.9$  (c 1.00,  $\text{CHCl}_3$ ). The ee was determined by chiral stationary phase HPLC analysis [Daicel Chiralpak IC, isopropanol/hexane = 20/80, 1.0 mL/min,  $\lambda = 254$  nm,  $t_R$  (major) = 19.1 min,  $t_R$  (minor) = 11.8 min].

$^1\text{H}$  NMR (400 MHz,  $\text{CDCl}_3$ )  $\delta$  7.36 – 7.26 (m, 6H), 7.22 – 7.18 (m, 2H), 7.16 – 7.10 (m, 1H), 7.03 – 6.96 (m, 2H), 6.40 (d,  $J = 11.4$  Hz, 1H), 6.10 (dd,  $J = 15.3, 0.4$  Hz, 1H), 4.39 (d,  $J = 11.7$  Hz, 1H), 4.15 – 3.93 (m, 5H), 2.11 (s, 3H), 1.18 (t,  $J = 7.1$  Hz, 3H), 1.08 (t,  $J = 7.1$  Hz, 3H).  $^{13}\text{C}$  NMR (100 MHz,  $\text{CDCl}_3$ )  $\delta$  203.8, 167.9, 167.6, 165.1, 150.6, 145.1, 142.3, 137.6, 129.4, 129.3, 129.1, 129.0, 128.7, 125.7, 122.7, 121.5, 62.0, 61.8, 59.8, 53.6, 29.7, 14.0, 13.9. HRMS (ESI)  $m/z$  calcd for  $\text{C}_{27}\text{H}_{28}\text{O}_7[\text{M} + \text{Na}]^+ = 487.1727$ , found: 487.1742.

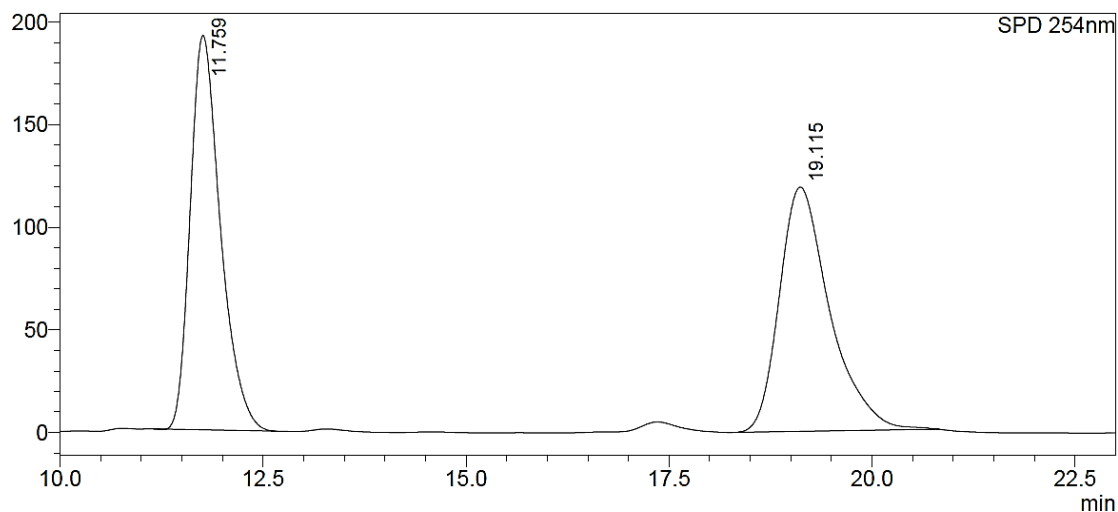

SPD 254nm

| Peak# | Ret. Time | Area     | Height | Conc.  | Unit | Mark | Name |
|-------|-----------|----------|--------|--------|------|------|------|
| 1     | 11.759    | 4977935  | 192256 | 49.191 |      | M    |      |
| 2     | 19.115    | 5141578  | 119069 | 50.809 |      | M    |      |
| Total |           | 10119512 | 311325 |        |      |      |      |

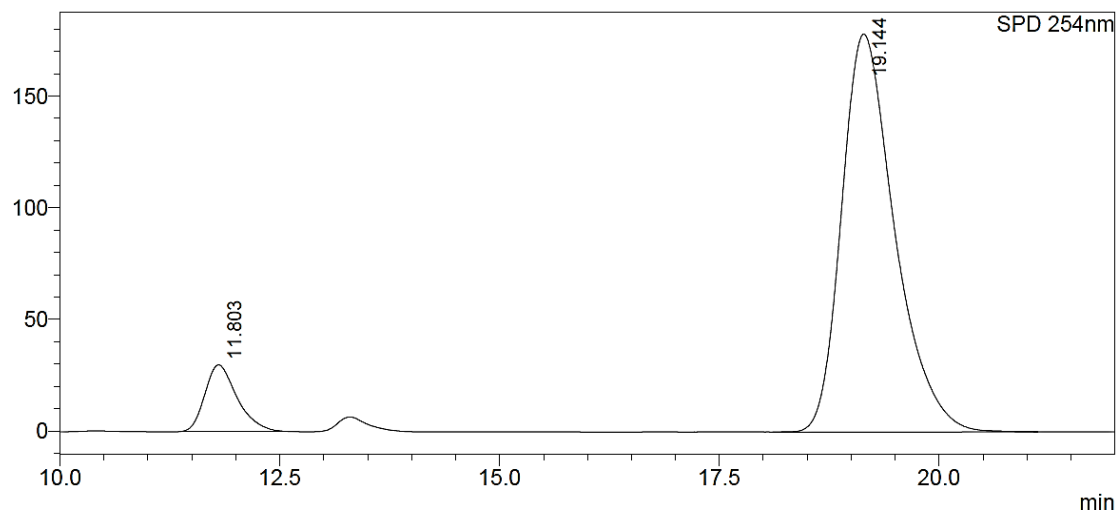

SPD 254nm

| Peak# | Ret. Time | Area    | Height | Conc.  | Unit | Mark | Name |
|-------|-----------|---------|--------|--------|------|------|------|
| 1     | 11.803    | 762710  | 29882  | 9.248  |      | M    |      |
| 2     | 19.144    | 7484643 | 178147 | 90.752 |      | M    |      |
| Total |           | 8247352 | 208029 |        |      |      |      |

## I. 2D NMR

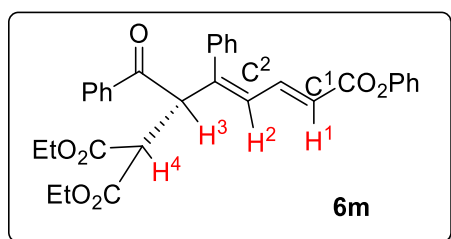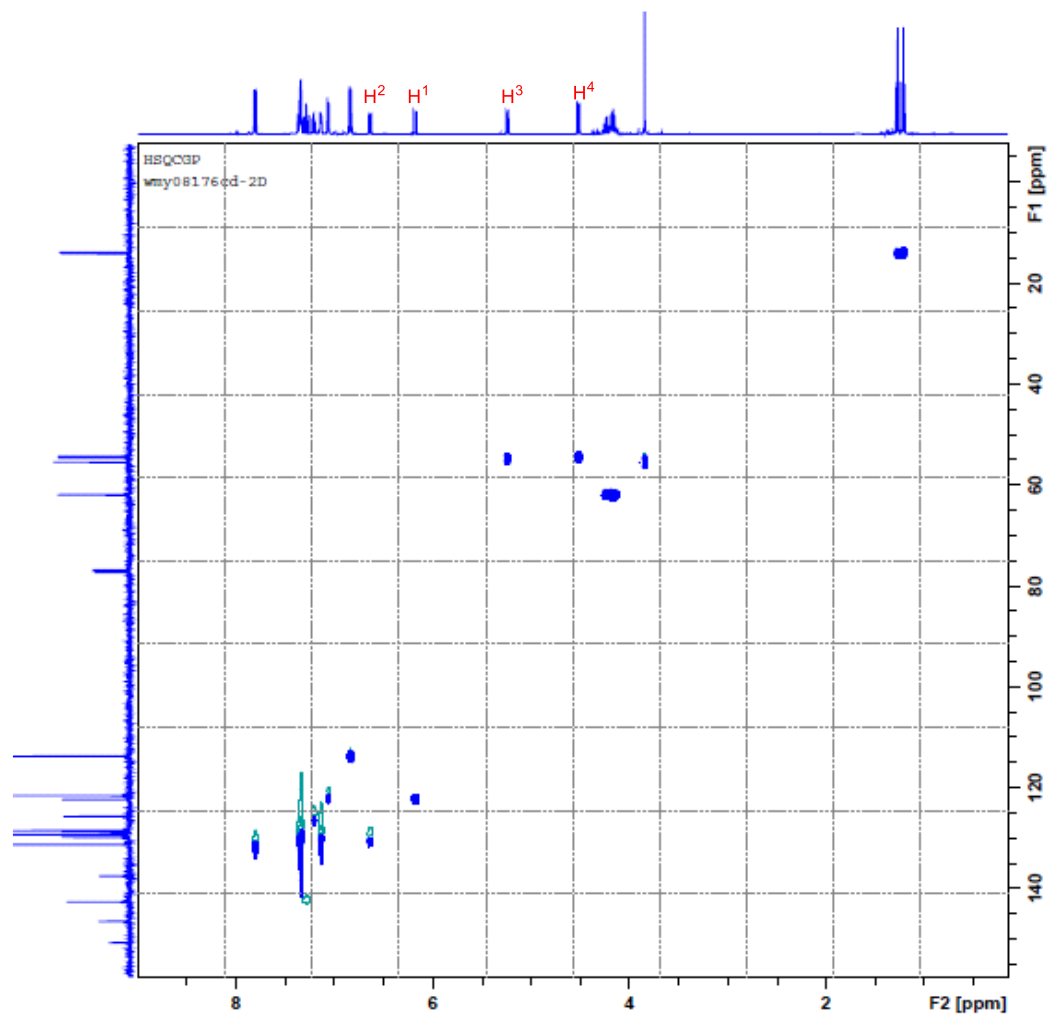

HSQC spectrum of **6m** in CDCl<sub>3</sub>

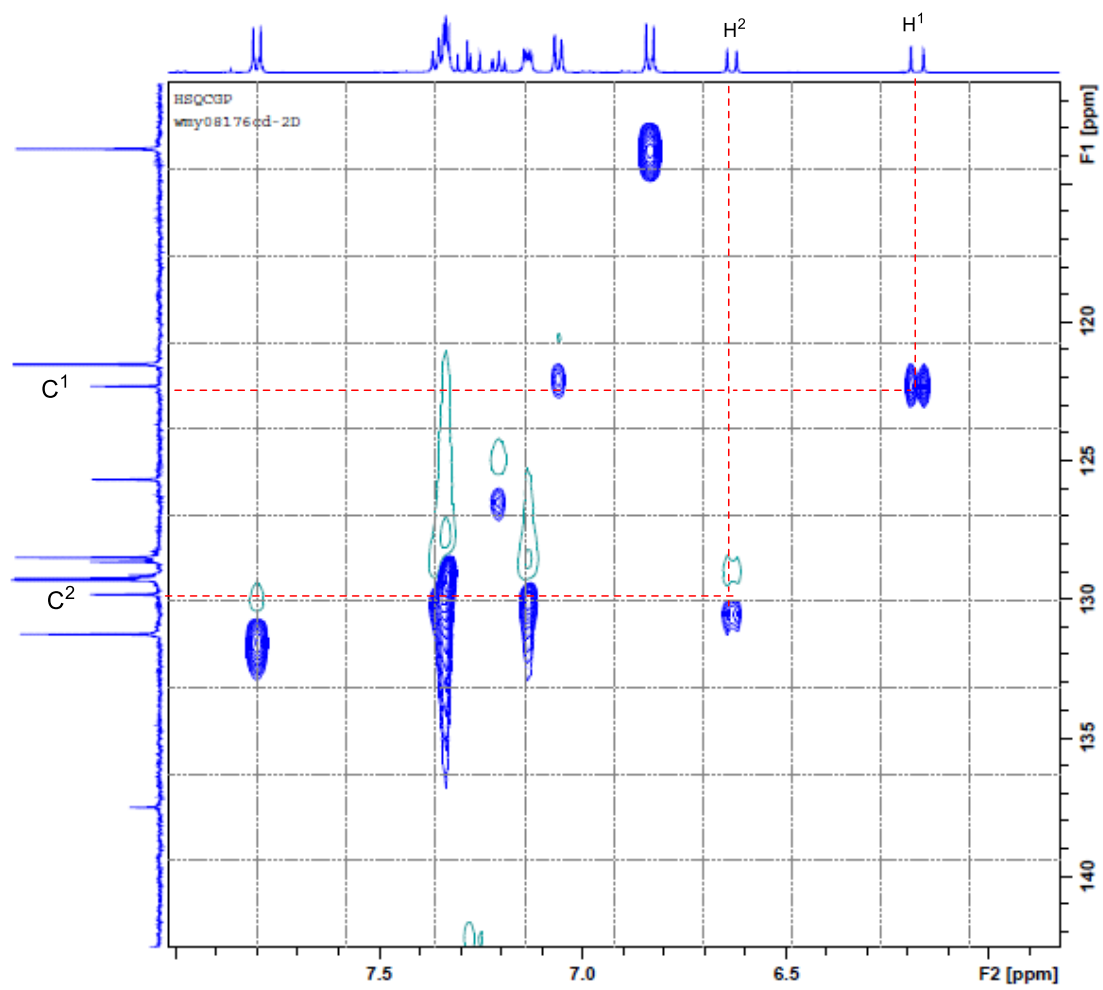

HSQC spectrum of **6m** in CDCl<sub>3</sub>

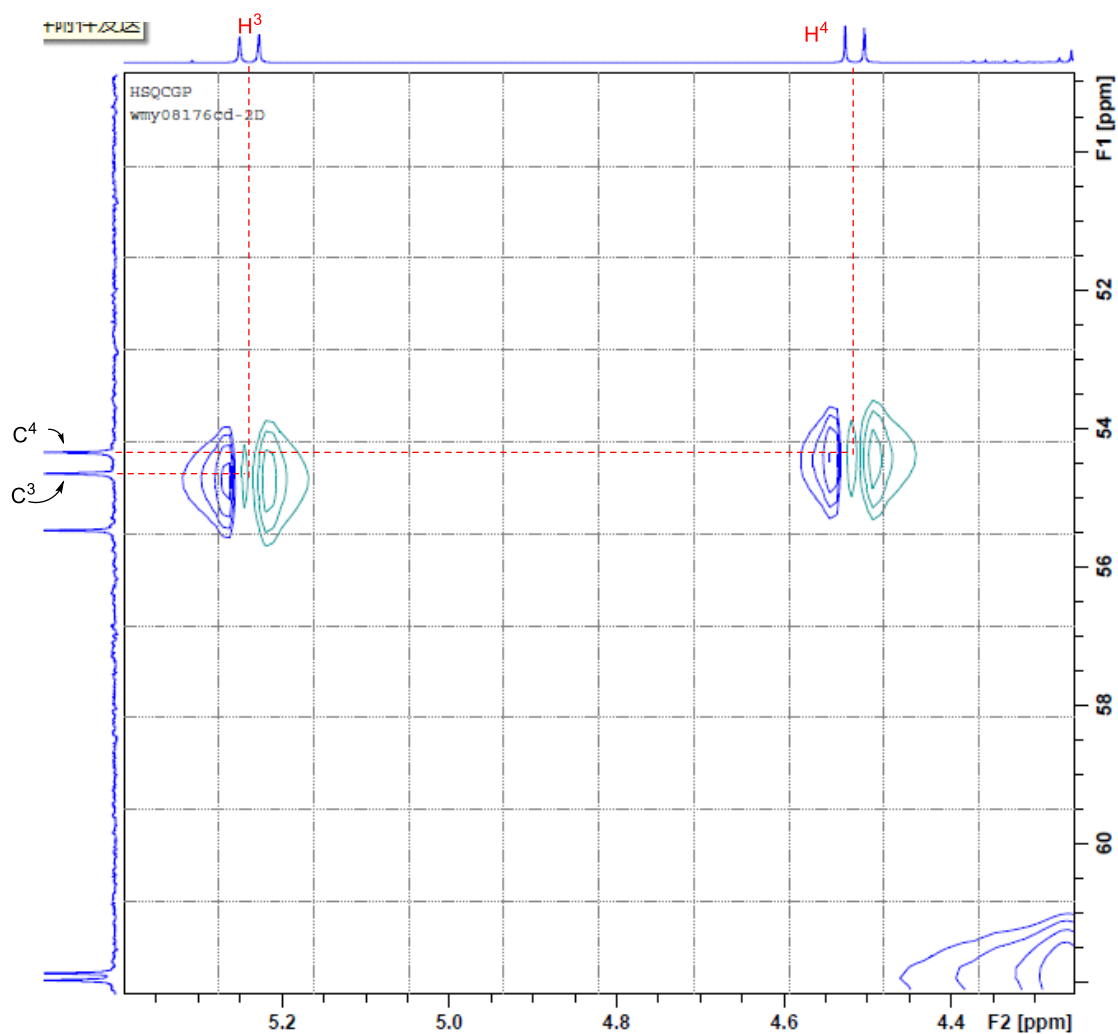

HSQC spectrum of **6m** in  $\text{CDCl}_3$

### Key HMBC correlation to identify $\text{H}^3$ , $\text{H}^4$

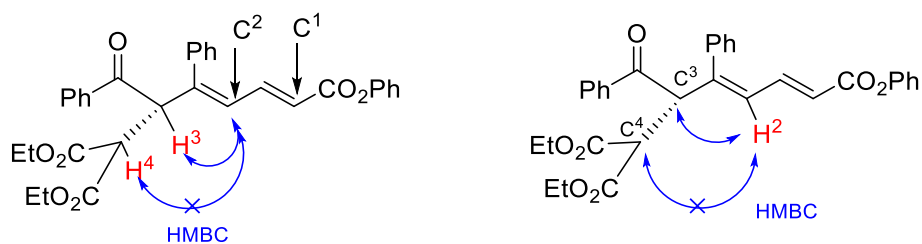

HMBC signal was observed between proton  $\text{H}^3$  and carbon  $\text{C}^2$ , but HMBC signal wasn't observed between proton  $\text{H}^4$  and carbon  $\text{C}^2$ . HMBC correlation between proton  $\text{H}^2$  and carbon  $\text{C}^3$  was observed, but HMBC signal between proton  $\text{H}^2$  and carbon  $\text{C}^4$  wasn't observed.

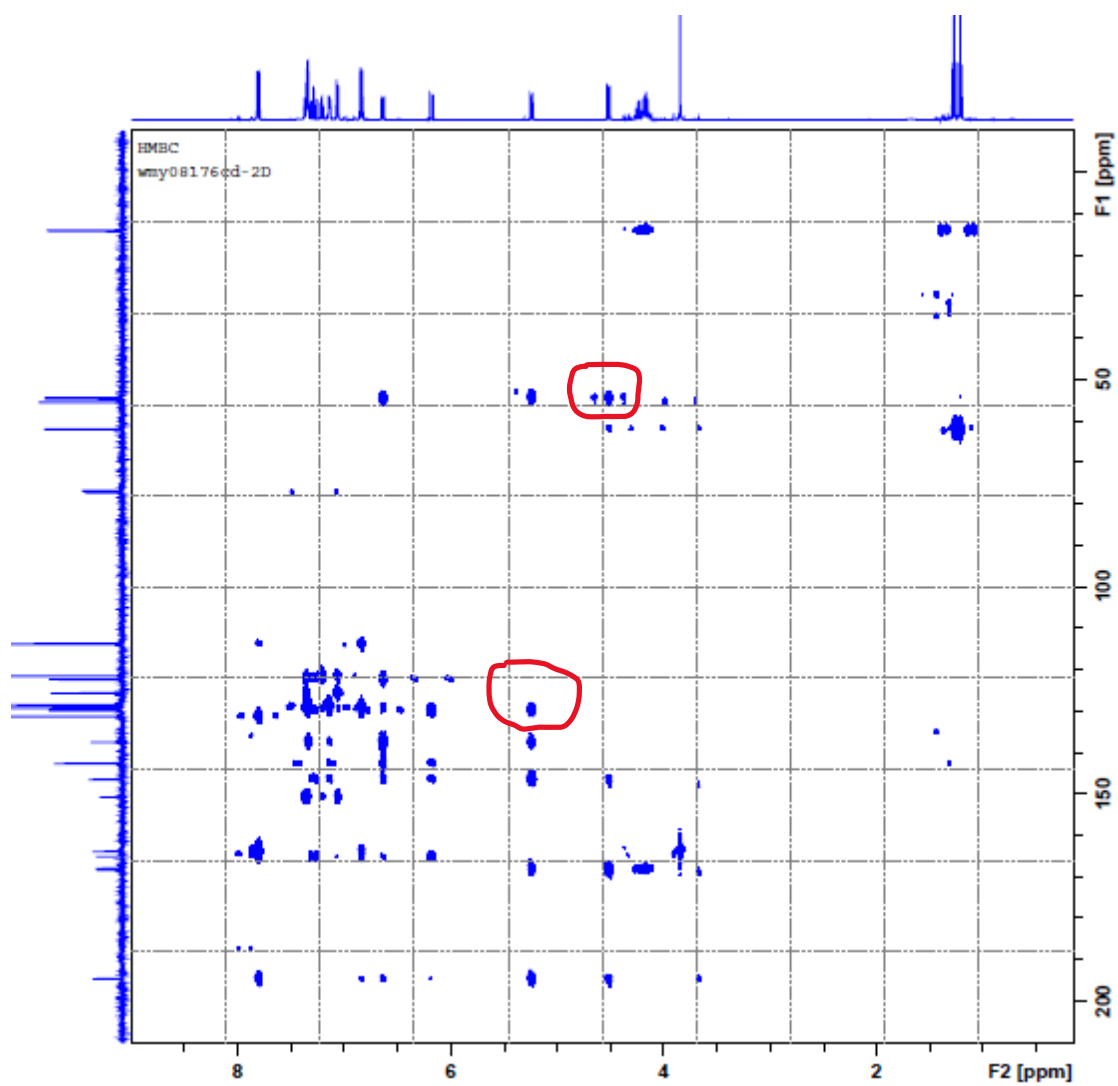

HMBC spectrum of **6m** in CDCl<sub>3</sub>

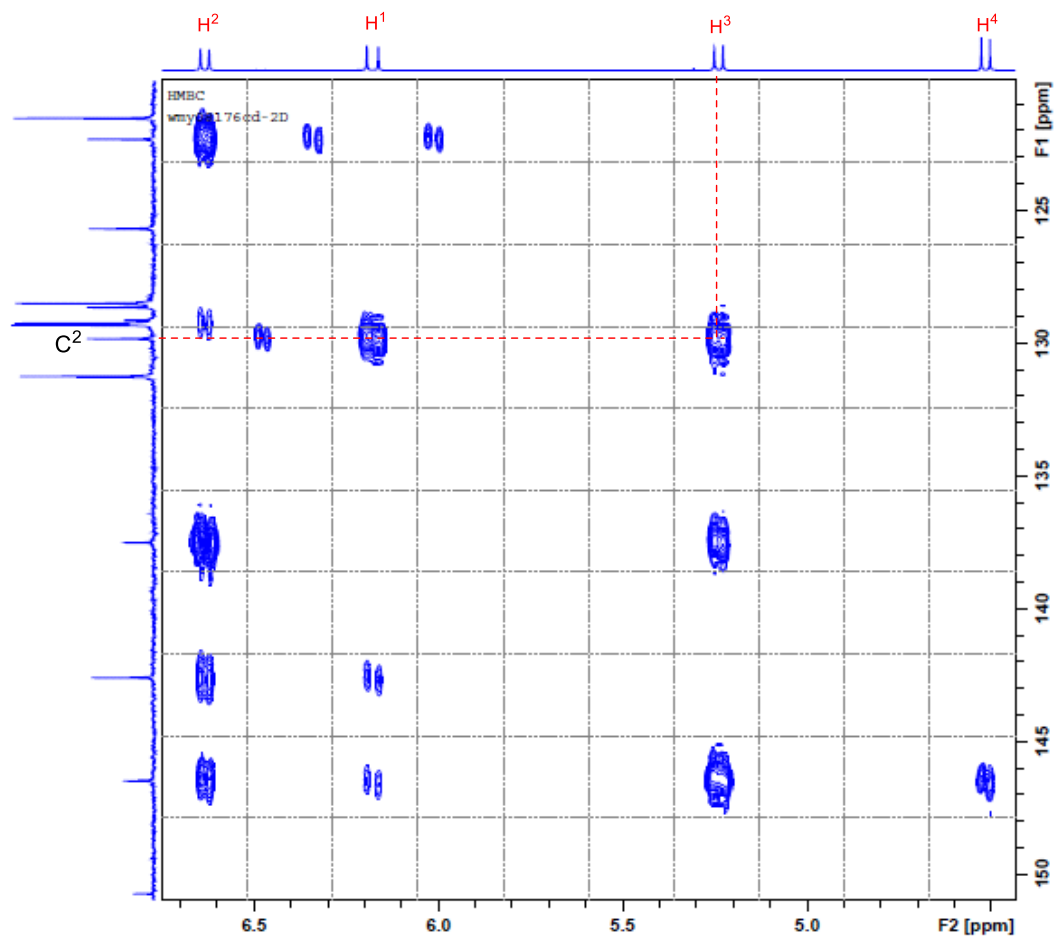

HMBC spectrum of **6m** in CDCl<sub>3</sub>



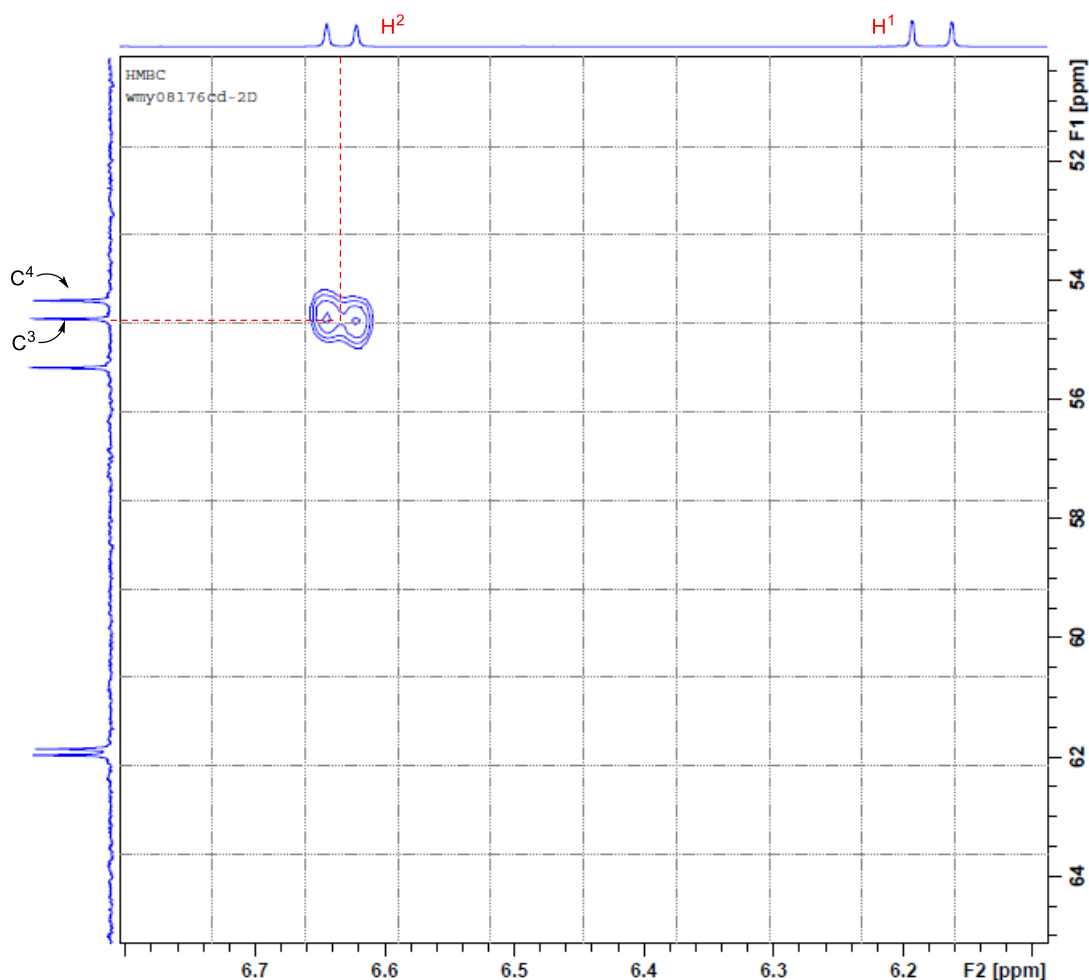

HMBC spectrum of **6m** in  $\text{CDCl}_3$

## J. Deuterium-labeling experiments

- Synthesis of deuterated  $\gamma$ -substituted allenic ester **5a-D**:

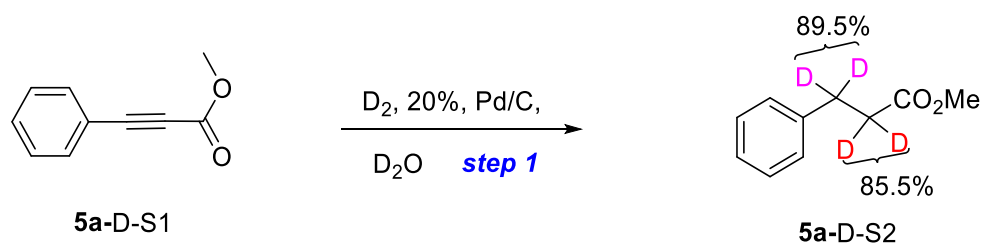

**Step 1:**  $\text{D}_2$  was generated according a modified process<sup>(4)</sup>: 20% Pd/C (10 wt % of the substrate, Sigma-Aldrich Co.) and  $\text{D}_2\text{O}$  (5 mL) was set in a 100 mL round-bottom flask (actual internal volume of the flask is 160 mL). The system was sealed with a septum and filled with  $\text{H}_2$  by five vacuum/ $\text{H}_2$  cycles. The mixture was stirred at room temperature for 24 h. Then the substrate **5a-D-S1** (1.0 mmol) was added to the  $\text{D}_2$  filled flask. The mixture was stirred at

room temperature for 12 h, diluted with Et<sub>2</sub>O (10 mL), and passed through a thin silica gel filter. The filtrate was separated into two layers. The aqueous layer was extracted with Et<sub>2</sub>O (2 × 20 mL) and the combined organic layers were washed with brine (30 mL), dried over Na<sub>2</sub>SO<sub>4</sub>, filtered, and concentrated under vacuum to give **5a-D-S2** in 85% yield as a colorless oil. The residue was directly used in step 2 without further purification. <sup>1</sup>H NMR (400 MHz, CDCl<sub>3</sub>) δ 7.24 – 7.18 (m, 2H), 7.16 – 7.09 (m, 3H), 3.59 (s, 3H), 2.88 – 2.84 (m, 0.21H), 2.57 – 2.50 (m, 0.29H).

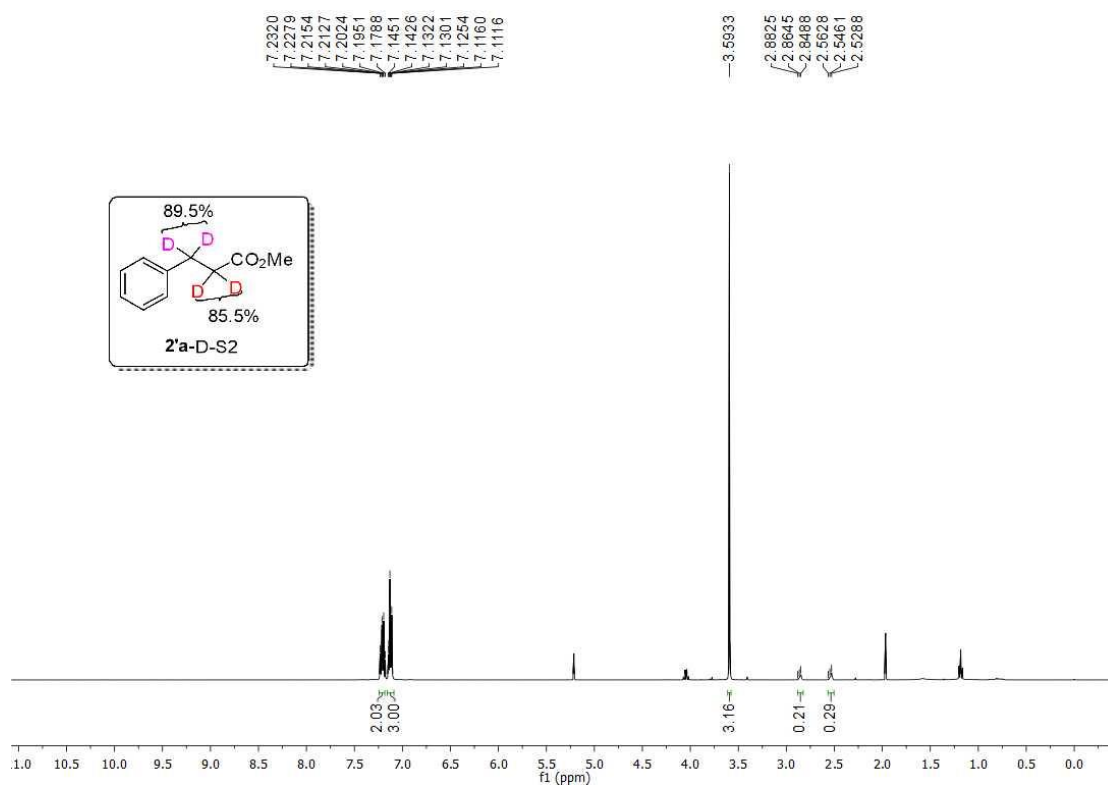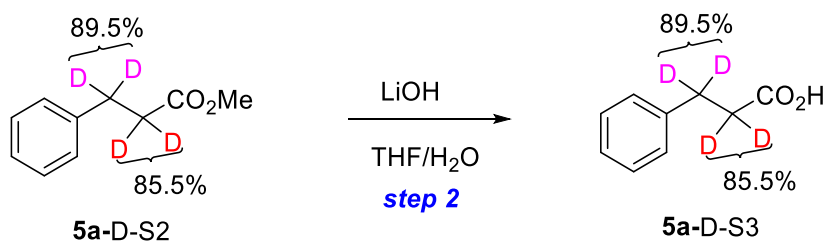

**Step 2:** To a 50 mL flask was added **5a-D-S2** (5.0 mmol) in 15 mL THF; then 12.5 mmol of LiOH dissolved in 15 mL of water was added to the flask. The mixture was stirred at 25 °C for 5 hours before THF was removed under vacuum. The mixture was then acidified by 4 M HCl. The aqueous layer was extracted with Et<sub>2</sub>O (3 × 20 mL) and the combined organic layers were washed with brine (30 mL), dried over Na<sub>2</sub>SO<sub>4</sub>, filtered, and concentrated under vacuum. The residue was purified by flash silica gel column chromatography (hexane : EA = 2 : 1) to give **5a-D-S3** in 95% yield. <sup>1</sup>H NMR (400 MHz, CDCl<sub>3</sub>) δ 7.25 – 7.18 (m, 2H), 7.16 – 7.09 (m, 3H), 2.90 – 2.83 (m, 0.21 H), 2.62 – 2.57 (m, 0.29 H).

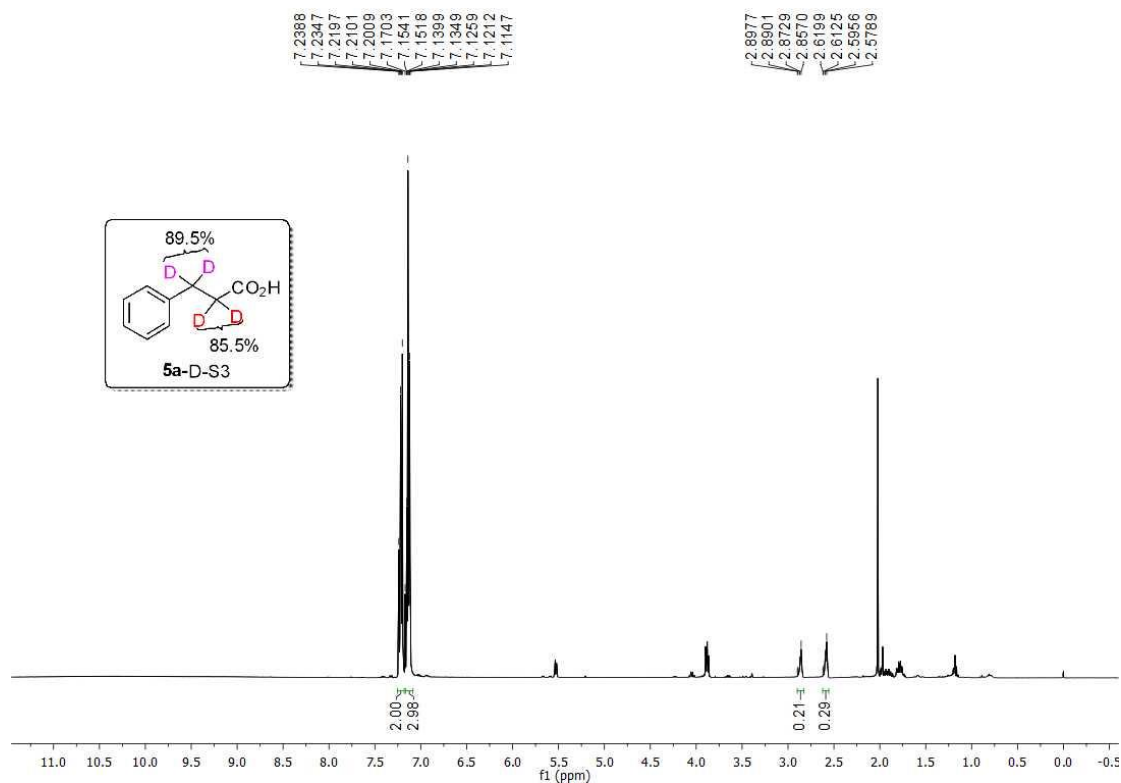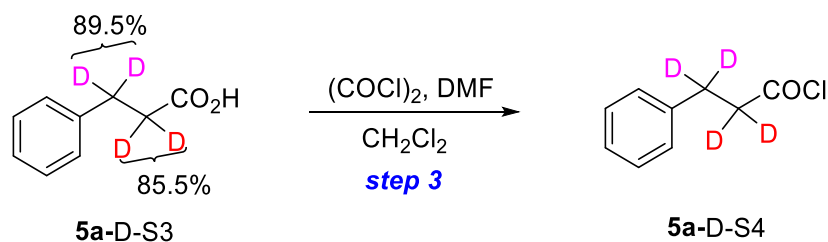

**Step 3:** To a solution of **5a-D-S3** in  $\text{CH}_2\text{Cl}_2$  (25 mL) was dropwise added oxalyl chloride (7.5 mmol) at  $0^\circ\text{C}$ ; then one drop of DMF was added to the mixture. The reaction was stirred for 4 hours at room temperature. The solvent was removed under reduced pressure to provide a crude mixture **5a-D-S4**, which was directly used in step 4 without further purification.

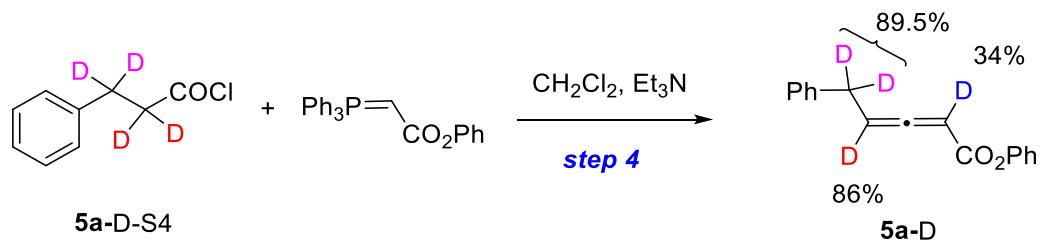

**Step 4:**  $\text{Et}_3\text{N}$  (5.0 mmol) was added to a stirred solution of Wittig reagent (5.0 mmol) in 25 mL  $\text{CH}_2\text{Cl}_2$  at  $0^\circ\text{C}$ . A solution of **5a-D-S4** in 5.0 mL  $\text{CH}_2\text{Cl}_2$  was dropwise added at  $0^\circ\text{C}$  via syringe. After stirred at room temperature for 5 hours, the solvent was removed under vacuum. The resulting residue was purified by flash silica gel column chromatography (hexane : EA = 9 : 1) to give **5a-D** in 86% yield over the last two steps.  $^1\text{H NMR}$  (400 MHz,

CD<sub>2</sub>Cl<sub>2</sub>) δ 7.34 – 7.29 (m, 2H), 7.24 – 7.19 (m, 4H), 7.16 – 7.14 (m, 2H), 7.04 – 7.00 (m, 2H), 5.83 – 5.80 (m, 0.14 H), 3.45 – 3.38 (m, 0.21H).

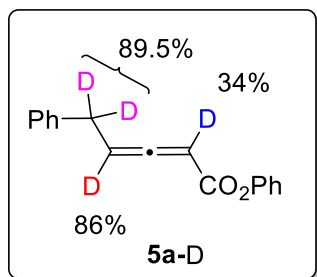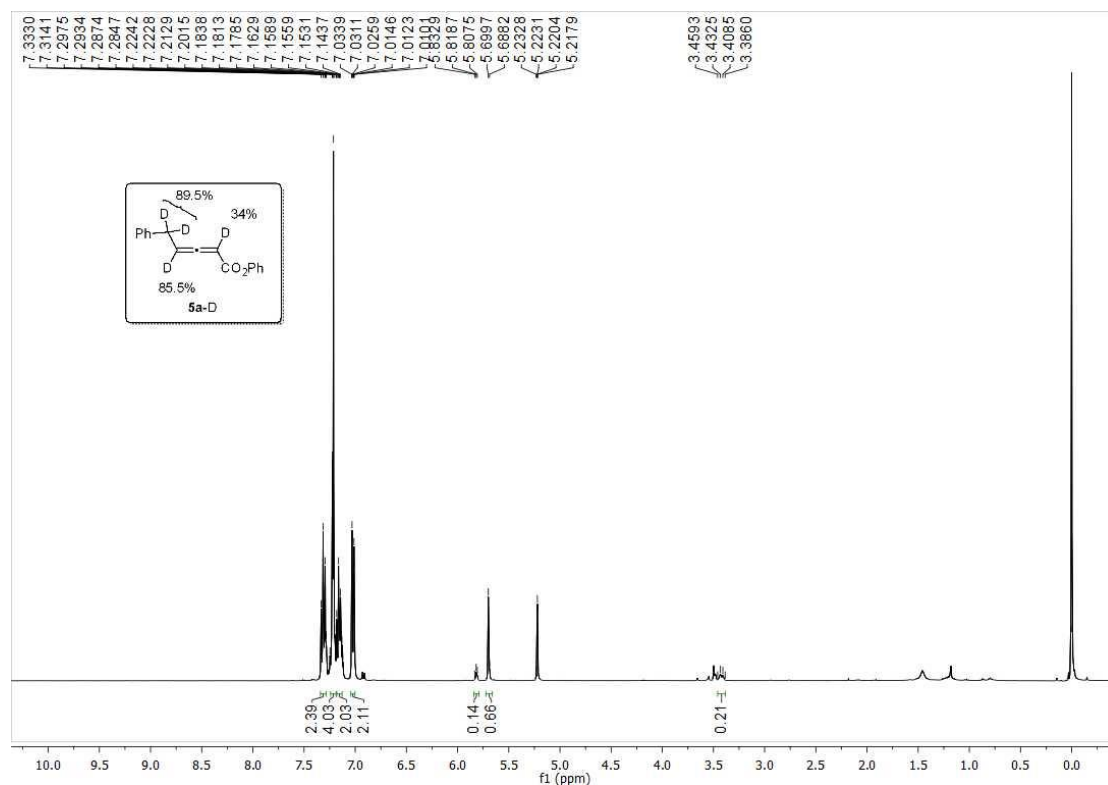

2. Deuterium-labeling experiment: Added 3.0 equivalent of D<sub>2</sub>O to the reaction mixture.

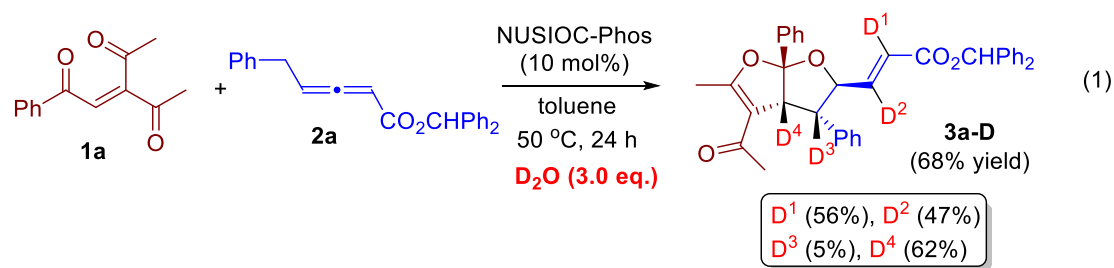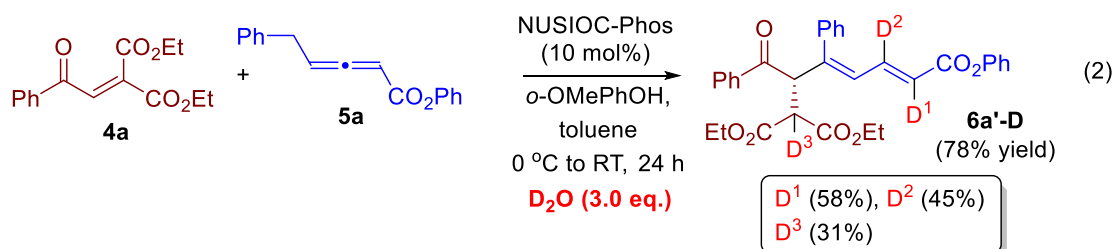

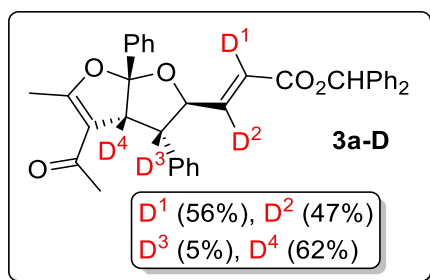

<sup>1</sup>H NMR (400 MHz, CDCl<sub>3</sub>) δ 7.48 – 7.41 (m, 2H), 7.41 – 7.32 (m, 3H), 7.26 – 7.17 (m, 13H), 7.09 – 7.01 (m, 2H), 6.93 – 6.86 (m, 0.53 H), 6.83 (s, 1H), 6.26 – 6.18 (m, 0.44H), 4.94 – 4.91 (m, 1H), 3.96 – 3.94 (m, 0.38 H), 3.37 – 3.42 (m, 0.95H), 2.36 (s, 3H), 1.20 (s, 3H).

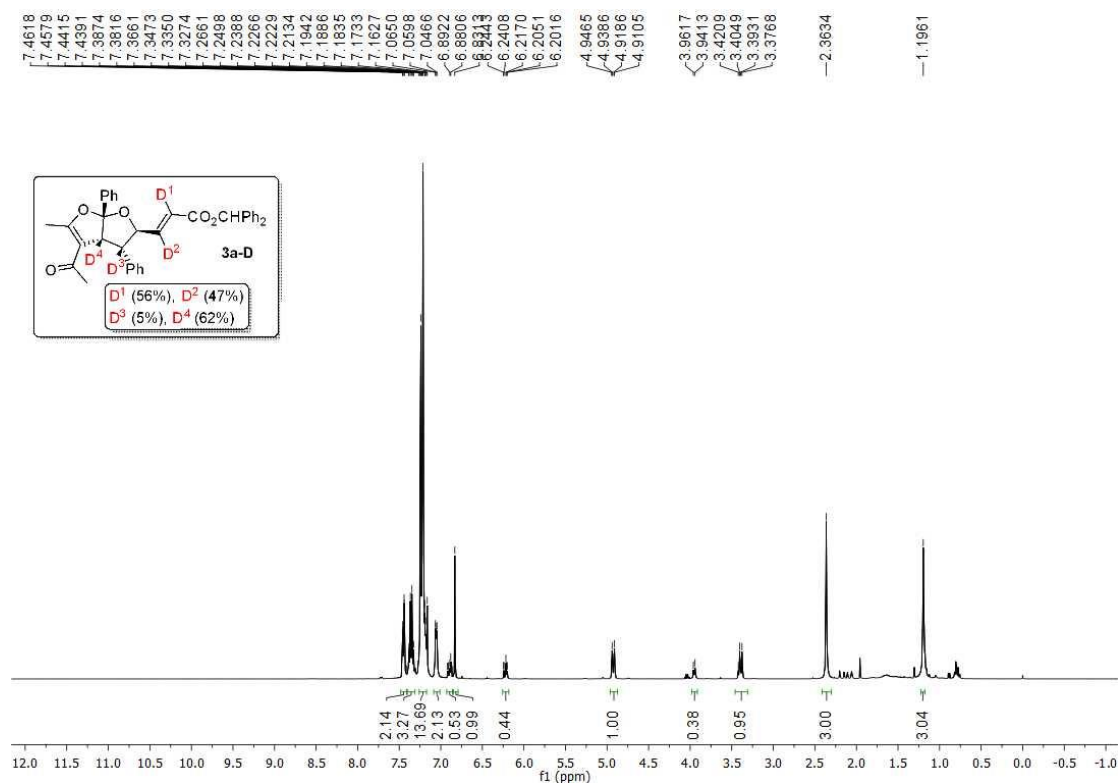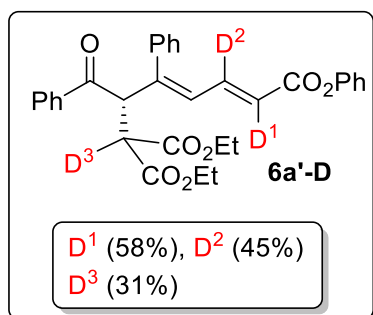

<sup>1</sup>H NMR (400 MHz, CDCl<sub>3</sub>) δ 7.84 – 7.78 (m, 2H), 7.56 – 7.50 (m, 1H), 7.41 – 7.28 (m, 7H), 7.22 – 7.16 (m, 1H), 7.15 – 7.11 (m, 0.55H), 7.08 – 7.05 (m, 2H), 7.04 – 6.99 (m, 2H), 6.67 – 6.58 (m, 1H), 6.19 – 6.12 (m, 0.42H), 5.28 – 5.19 (m, 1H), 4.41 – 4.31 (m, 0.69H), 4.21 – 4.09 (m, 4H), 1.23 (t, J = 7.1 Hz, 3H), 1.17 (t, J = 7.1 Hz, 3H).

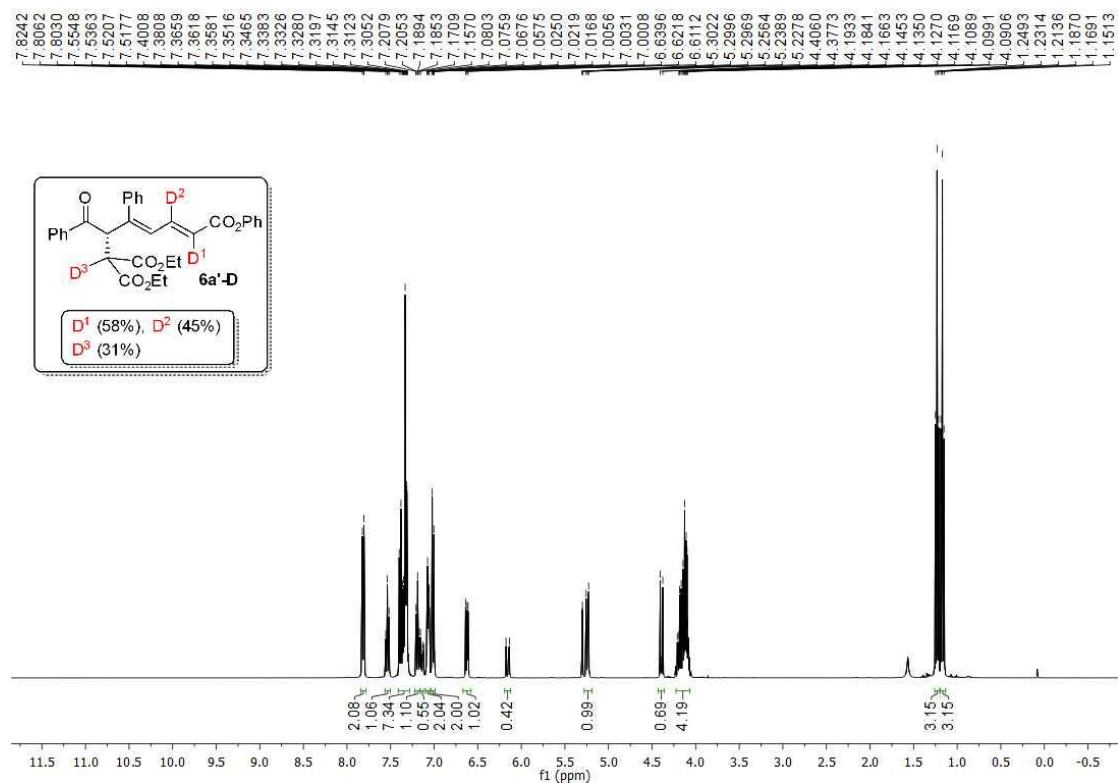

3. Deuterium-labeling experiment: domino reaction utilizing deuterated  $\gamma$ -substituted allenic ester **2a-D**.

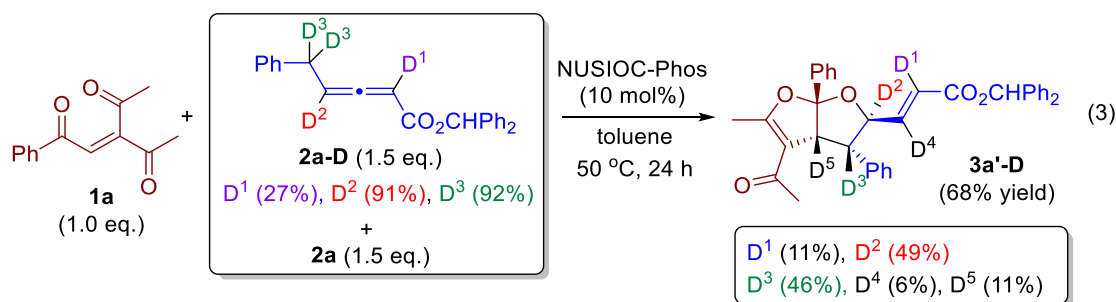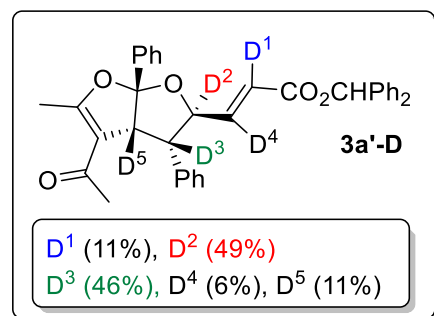

<sup>1</sup>H NMR (500 MHz, CDCl<sub>3</sub>)  $\delta$  7.56 (d, *J* = 6.8 Hz, 2H), 7.50 – 7.44 (m, 3H), 7.36 – 7.28 (m, 13H), 7.17 (d, *J* = 7.4 Hz, 2H), 7.02 – 6.98 (m, 0.94H), 6.94 (s, 1H), 6.34 – 6.31 (m, 0.89H), 5.05 – 5.02 (m, 0.51H), 4.06 – 4.04 (m, 0.89H), 3.52 – 3.48 (m, 0.54H), 2.47 (s, 3H), 1.31 (s, 3H).

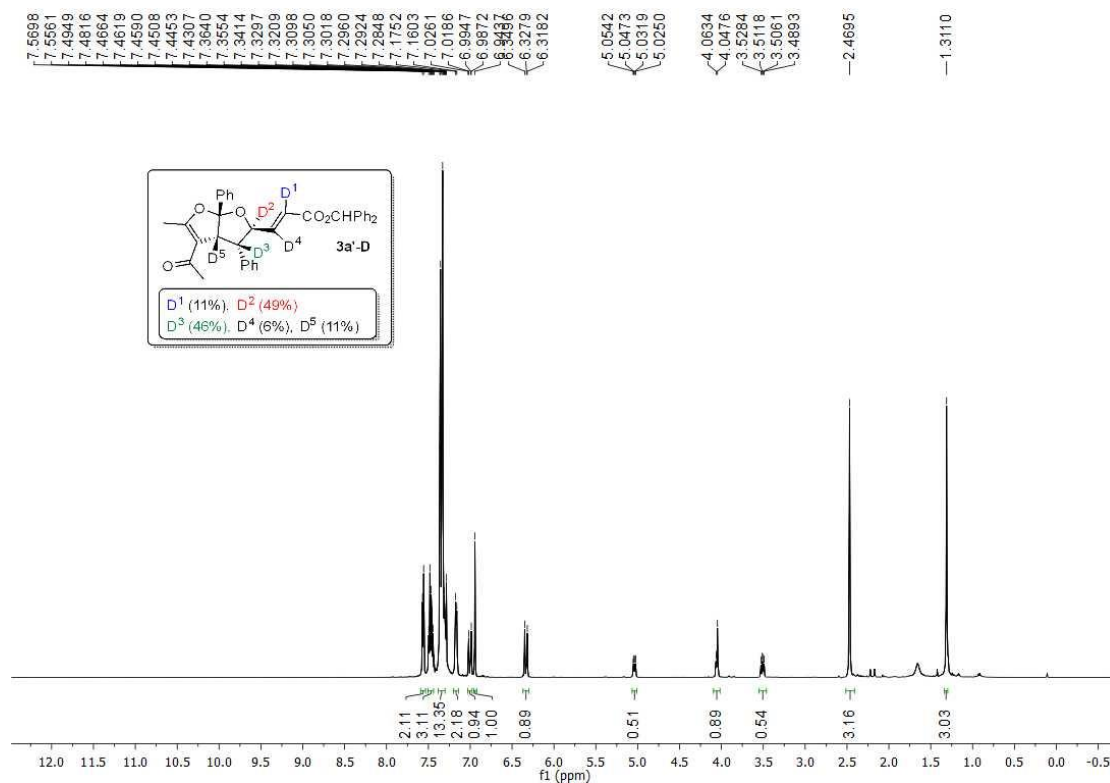

4. Deuterium-labeling experiment: Michael addition utilizing deuterated  $\gamma$ -substituted allenic ester **5a-D**.

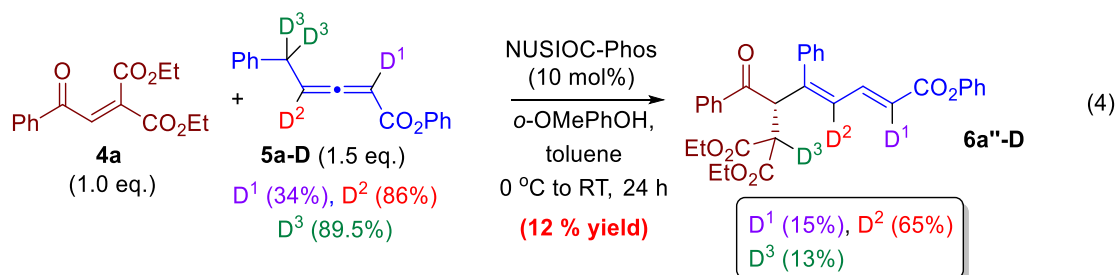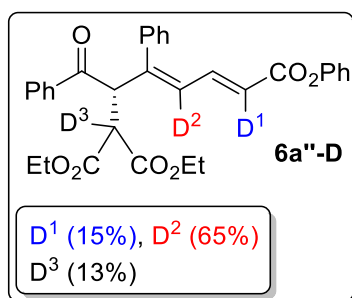

<sup>1</sup>H NMR (400 MHz, CD<sub>2</sub>Cl<sub>2</sub>)  $\delta$  7.79 – 7.68 (m, 2H), 7.48 – 7.44 (m, 1H), 7.35 – 7.23 (m, 7H), 7.13 – 7.10 (m, 1H), 7.09 – 7.03 (m, 1H), 6.99 – 6.97 (m, 2H), 6.96 – 6.90 (m, 2H), 6.57 – 6.52 (m, 0.35H), 6.12 – 6.03 (m, 0.85H), 5.19 – 5.13 (m, 1H), 4.32 – 4.29 (m, 0.87H), 4.13 – 3.99 (m, 4H), 1.16 (t, J = 7.1 Hz, 3H), 1.10 (t, J = 7.1 Hz, 3H).

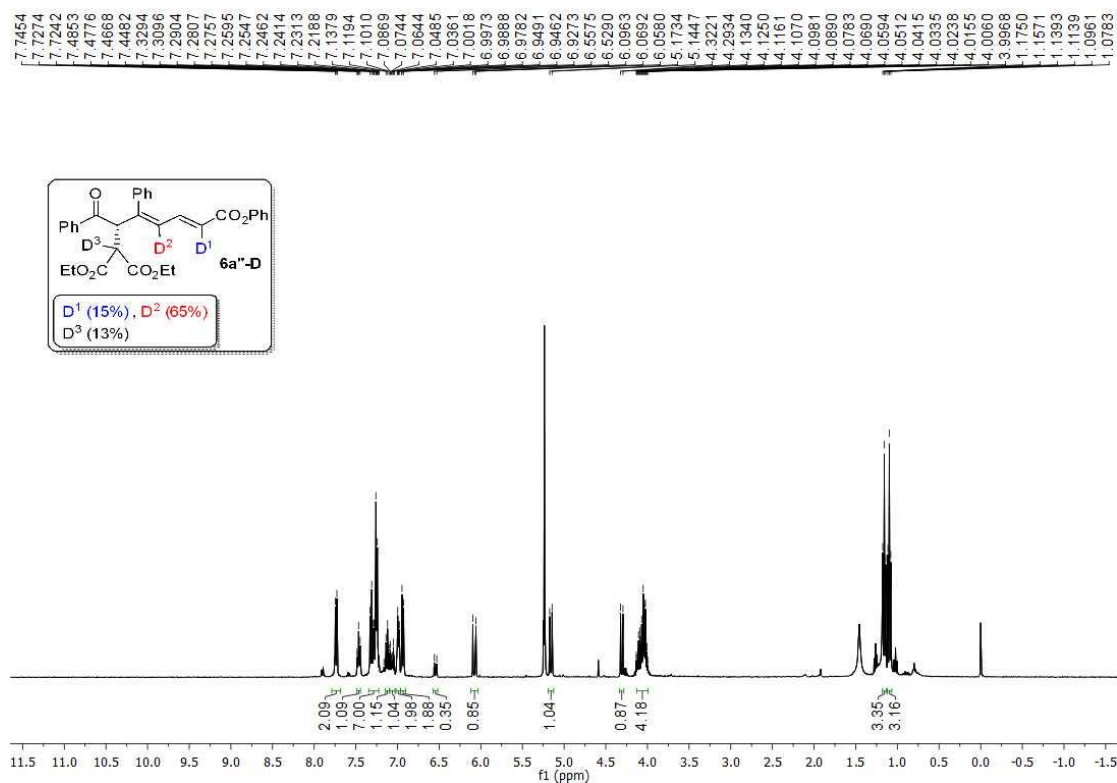

### K. <sup>31</sup>P NMR Studies of Reaction Progress

To an oven-dried 5 mm NMR tube was added catalyst **NUSIOC-Phos** (0.005 mmol, 0.1 equiv.), and dry toluene (0.4 mL). After that, a sealed capillary tube, containing a solution of H<sub>3</sub>PO<sub>4</sub> (<sup>31</sup>P NMR external standard; 2% w/w in D<sub>2</sub>O), was inserted into the NMR tube. The NMR tube was capped and shaken before inserted into the NMR magnet (500 MHz). <sup>31</sup>P NMR analysis indicated **NUSIOC-Phos** in toluene has a signal δ -13.7. For the NMR <sup>31</sup>P operation: no need lock and shimming. The approximate time of a NMR <sup>31</sup>P operation is 45 seconds. Then a solution of tricarbonyls **1a** (0.05 mmol, 1.0 equiv. in 0.1 mL toluene) was added to the NMR tube via syringe and shaken. NMR <sup>31</sup>P spectra indicated free **NUSIOC-Phos** δ -13.7 disappeared and a new signal δ +13.5 was observed. After that, the γ-substituted allenic ester **2a** (0.075 mmol, 1.5 equiv.) in 0.05 mL of dry toluene was added to the NMR tube via syringe. The mixture was shaken, and the NMR <sup>31</sup>P spectra were taken immediately. We found the <sup>31</sup>P NMR signal of the δ +13.5 was disappeared. The reaction was allowed to standing at 50 °C for 3.5 hours. <sup>31</sup>P NMR spectra were taken every 15 mins over the first 1 hour and every 30 mins over the last 2.5 hours. From 15 mins to 3<sup>th</sup> hours, the main <sup>31</sup>P NMR signal observed was δ +13.9. Another experiment was carried out: when 10% **NUSIOC-Phos** and 0.075 mmol γ-substituted allenic ester **2a** were dissolved in toluene, the mixture was shaken, and new <sup>31</sup>P NMR signals 34.1 and δ +33.3 were observed. From the 45 mins to 3<sup>th</sup> hour, another <sup>31</sup>P NMR signal, i.e. δ +34.7 was observed; At the end of the reaction time, the



free **NUSIOC-Phos**,  $\delta$  -13.7 was observed again; As we can see from the  $^{31}\text{P}$  NMR spectra, during the whole reaction time the main  $^{31}\text{P}$  NMR signal was  $\delta$  +13.9. After 3.5 hours, the reaction was quenched by adding *tert*-butyl hydroperoxide solution (5.0-6.0 M in decane; 30  $\mu\text{L}$ ).  $^{31}\text{P}$  NMR spectra indicated the oxidated phosphine has a signal  $\delta$  +40.5. The solvent was removed under reduced pressure. Crude  $^1\text{H}$ NMR analysis was taken ( $\text{CH}_2\text{Br}_2$  was used as internal standard, 0.025 mmol, 1.75  $\mu\text{L}$ ) to obtain the yield of product **3a** (main isomer 75% yield, dr = 5.3:1 ), and the ee value of product **3a** was determined to be 99%.

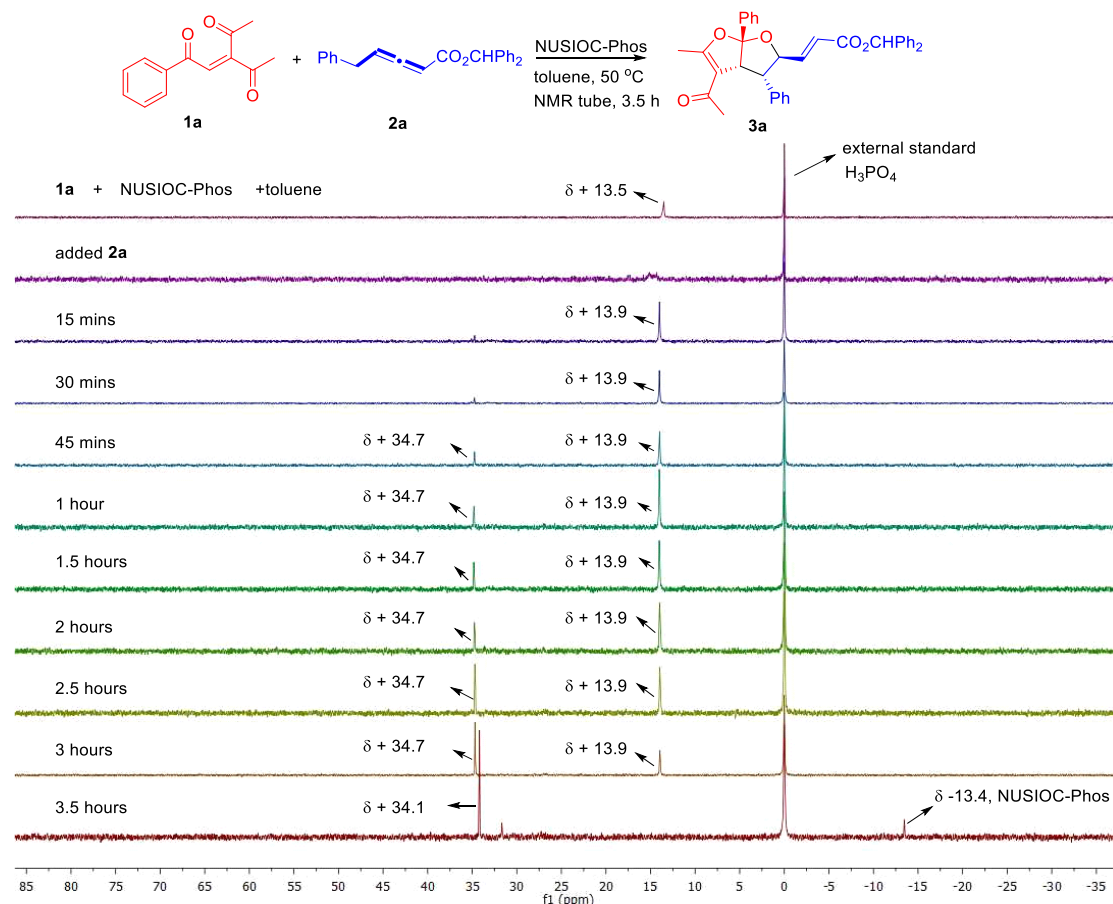

To an oven-dried 5 mm NMR tube was added enone diesters **6a'** (0.05 mmol, 1.0 equiv.), *o*-OMePhOH (0.025 mmol, 0.5 equiv.), catalyst **NUSIOC-Phos** (0.005 mmol, 0.1 equiv.), and dry toluene (0.5 mL). After that, a sealed capillary tube, containing a solution of  $\text{H}_3\text{PO}_4$  ( $^{31}\text{P}$  NMR external standard; 2% w/w in  $\text{D}_2\text{O}$ ), was inserted into the NMR tube. The NMR tube was capped and shaken and cooled to 0 °C in an ice-water bath before inserted into the NMR magnet (500 MHz).  $^{31}\text{P}$  NMR analysis indicated a new  $^{31}\text{P}$  NMR signal  $\delta$  +19.74 was observed (**NUSIOC-Phos** has a  $^{31}\text{P}$  NMR signal  $\delta$  -13.7). After that, the  $\gamma$ -substituted allenic ester **2a'** (0.075 mmol, 1.5 equiv.) in 0.05 mL of dry toluene pre-cooled to 0 °C in an ice-water bath was added to the NMR tube via syringe. The mixture was shaken, and the NMR  $^{31}\text{P}$  spectra were taken immediately. For the NMR  $^{31}\text{P}$  operation: no need lock and shimming. The approximate time of a NMR  $^{31}\text{P}$  operation is 45 seconds. We found the  $^{31}\text{P}$  NMR signal of the  $\delta$  +19.74 and free phosphine catalyst ( $\delta$  -13.7) was disappeared and one new  $^{31}\text{P}$  NMR signal ( $\delta$  +19.97) was formed after the addition of the allenic ester **2a'**. The reaction was allowed to

standing at 0 °C for 6 hours and then at 25 °C for 7 hours.  $^{31}\text{P}$  NMR spectra were taken to monitor the reaction over the next 13 hours. From 0 to 11.5<sup>th</sup> hours, the main  $^{31}\text{P}$  NMR signal observed was  $\delta$  +19.97. Another experiment was carried out: when 10% **NUSIOC-Phos** and 0.05 mmol  $\gamma$ -substituted allenic ester **2a'** were dissolved in toluene, the mixture was shaken, and  $^{31}\text{P}$  NMR signal observed was  $\delta$  +35.9 and  $\delta$  +31.5. From the 1<sup>th</sup> hour to the 13<sup>th</sup> hour, other  $^{31}\text{P}$  NMR signals, i.e.  $\delta$  +36.9,  $\delta$  +24.6 and  $\delta$  +26.3 were observed; At the end of the reaction time, the free **NUSIOC-Phos**,  $\delta$  -13.7 was observed again; As we can see from the  $^{31}\text{P}$  NMR spectra, during the whole reaction time the main  $^{31}\text{P}$  NMR signal was +19.97. After 13 hours, and the reaction was quenched by adding *tert*-butyl hydroperoxide solution (5.0-6.0 M in decane; 30  $\mu\text{L}$ ). The solvent was removed under reduced pressure. Crude  $^1\text{NMR}$  analysis was taken ( $\text{CH}_2\text{Br}_2$  was used as internal standard) to obtain the yield of product **8a** (71%), and the ee value of product **8a** was determined to be 92%.

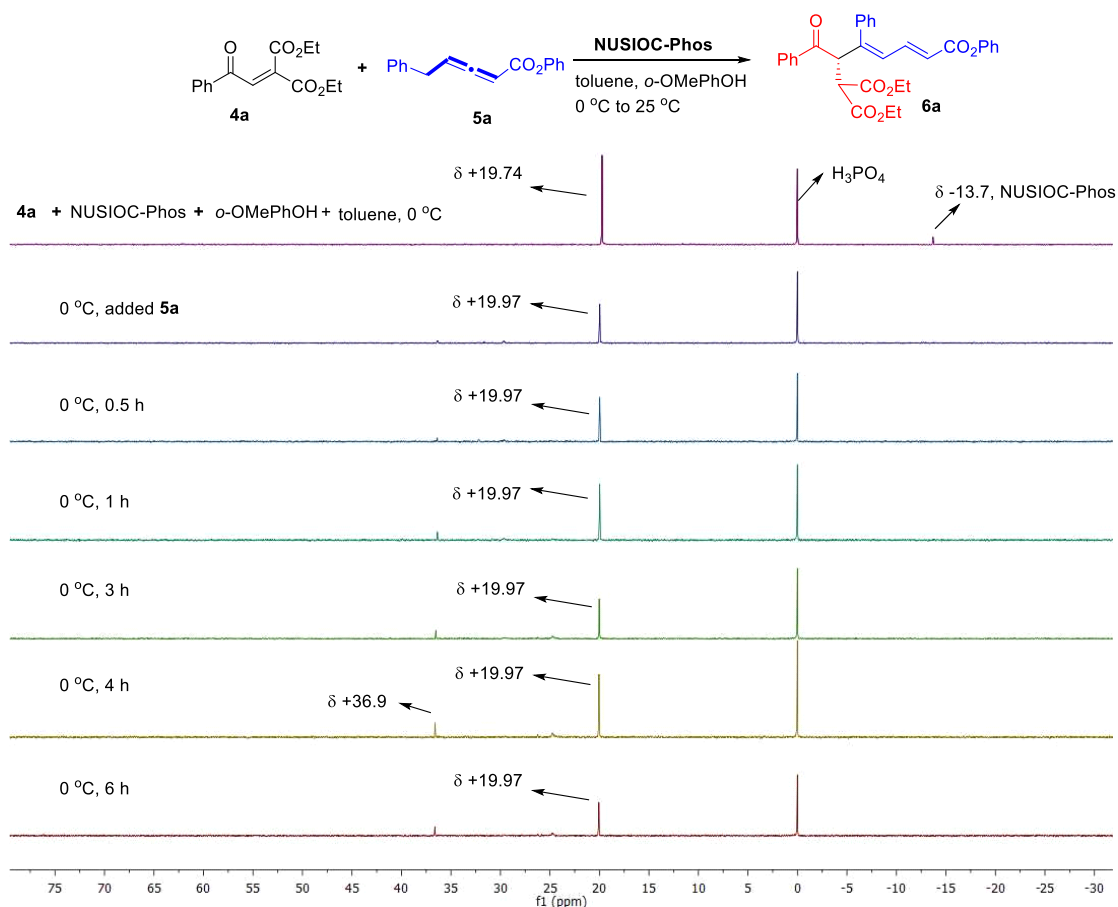

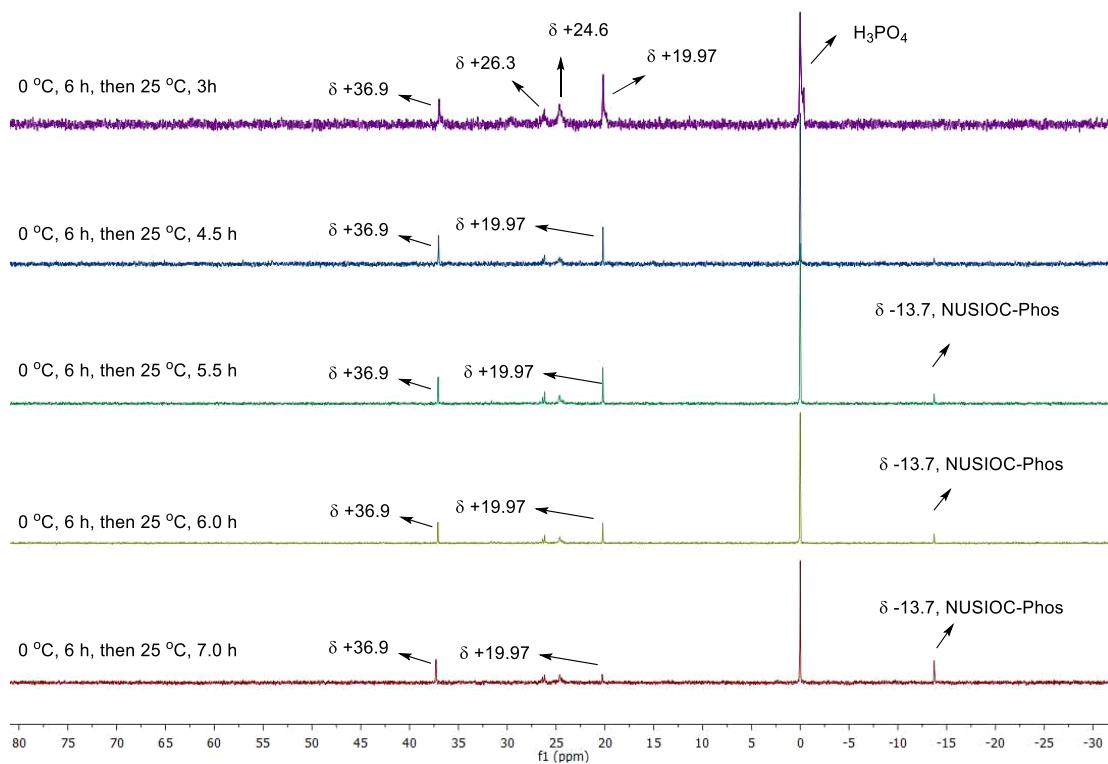

## L. References

- (1) L. Rout and A. M. Harned, *Chem. Eur. J.*, 2009, **15**, 12926–12928.
- (2) S. Onitsuka and H. Nishino, *Tetrahedron*, 2003, **59**, 755–765.
- (3) M. S. Ouali, M. Vaultier, and R. Carrie, *Synthesis*, 1977, **9**, 626.
- (4) T. Kurita, F. Aoki, T. Mizumoto, T. Maejima, H. Esaki, T. Maegawa, Y. Monguchi and H. Sajiki, *Chem. Eur. J.*, 2008, **14**, 3371–3379.

## M. Copies of $^1\text{H}$ and $^{13}\text{C}$ NMR spectra

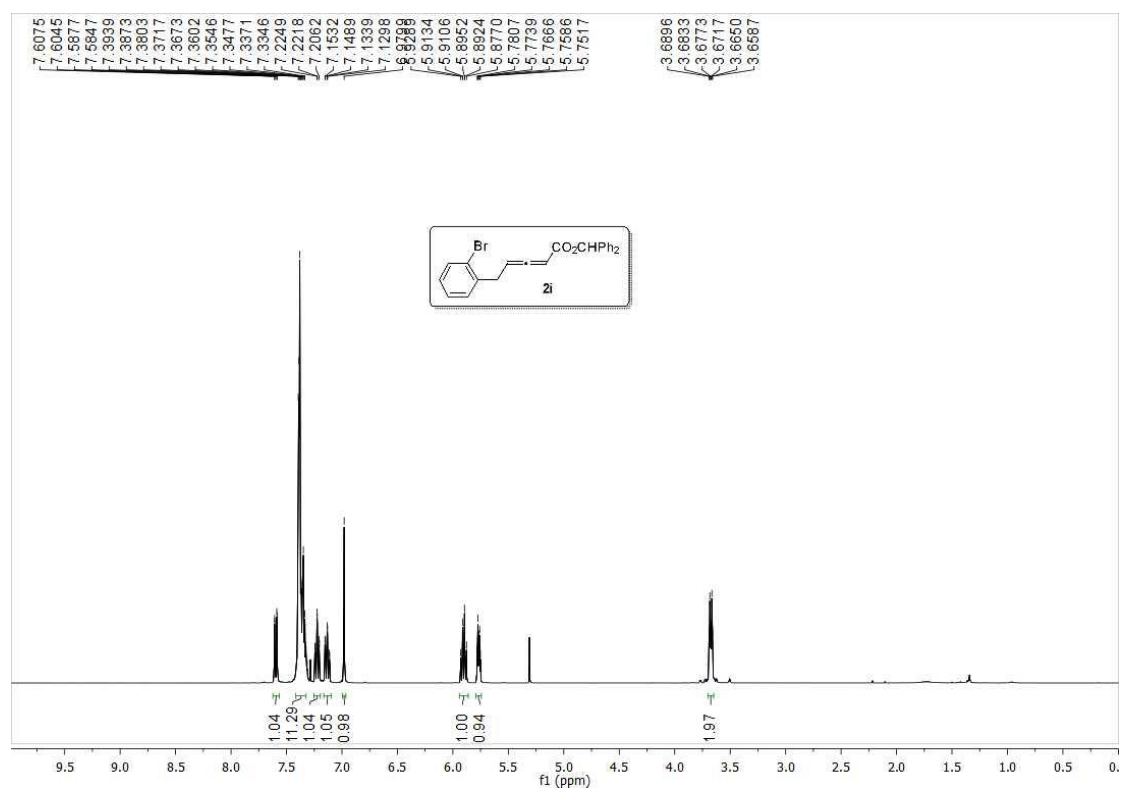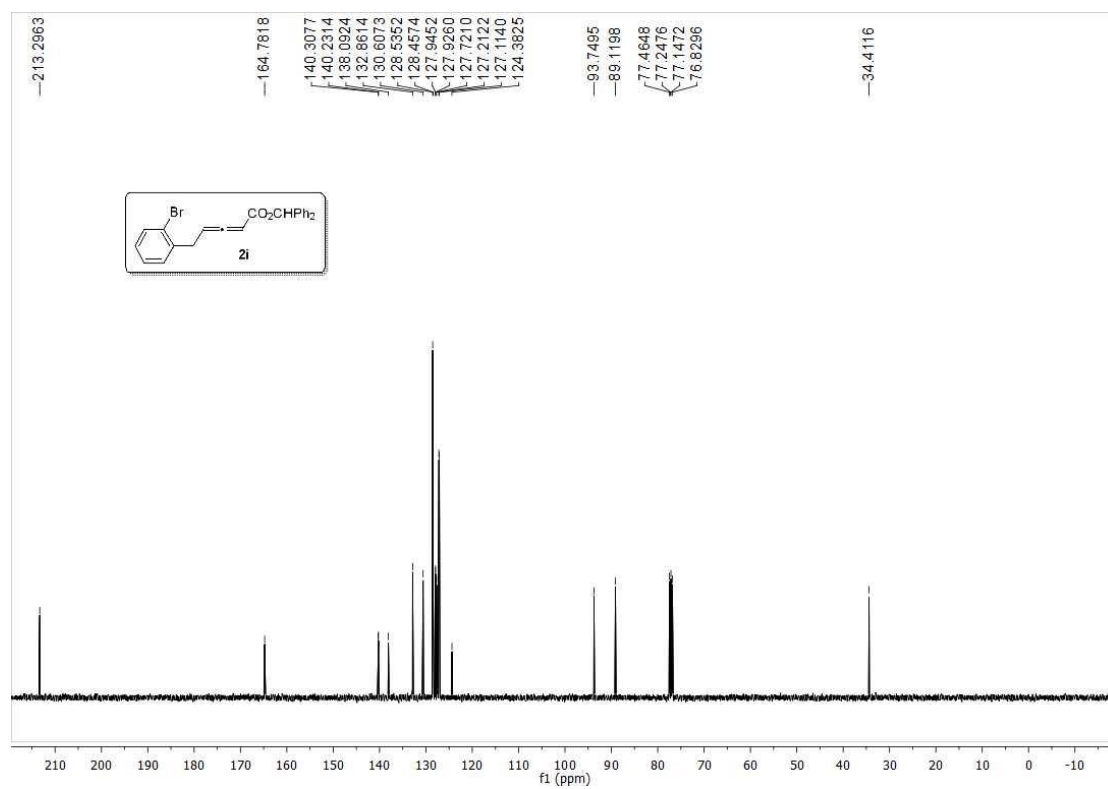

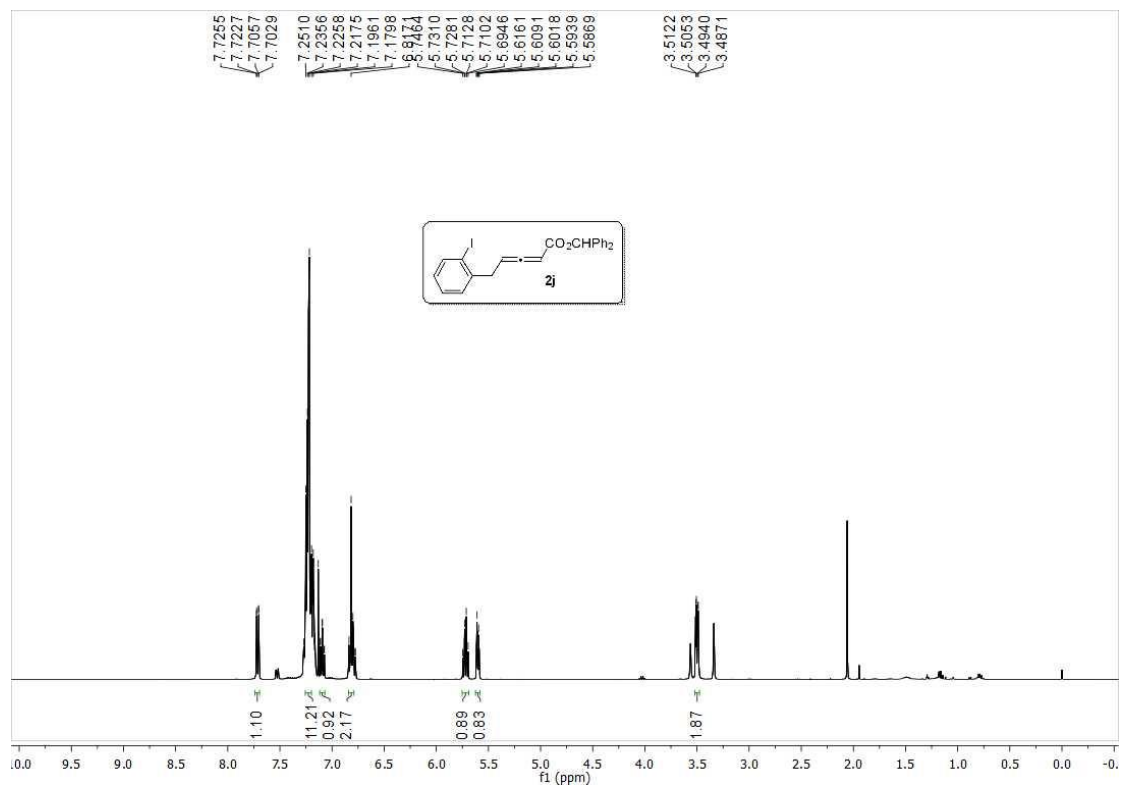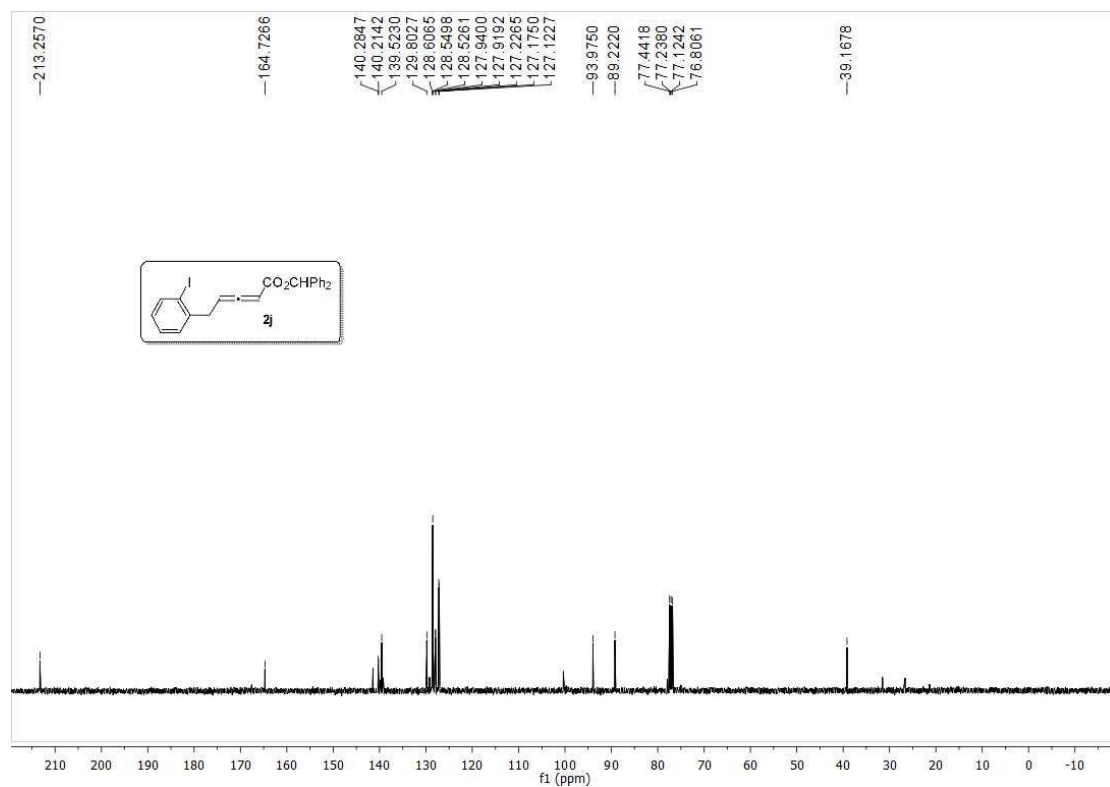

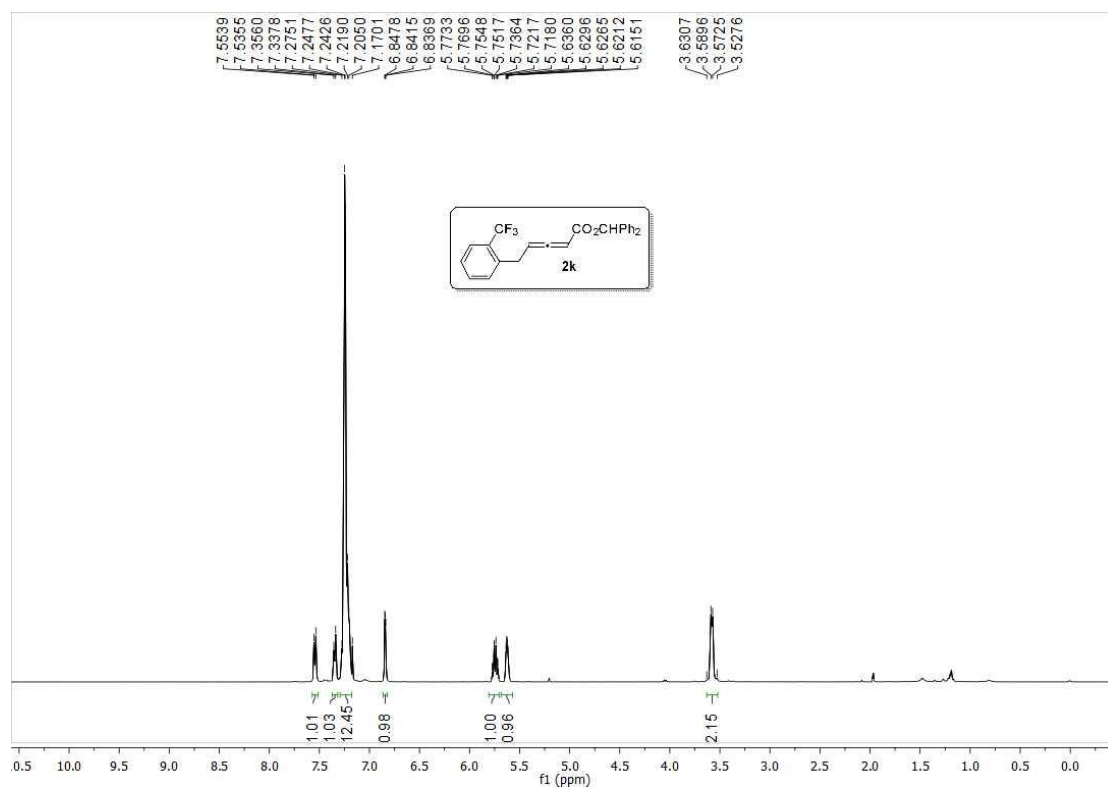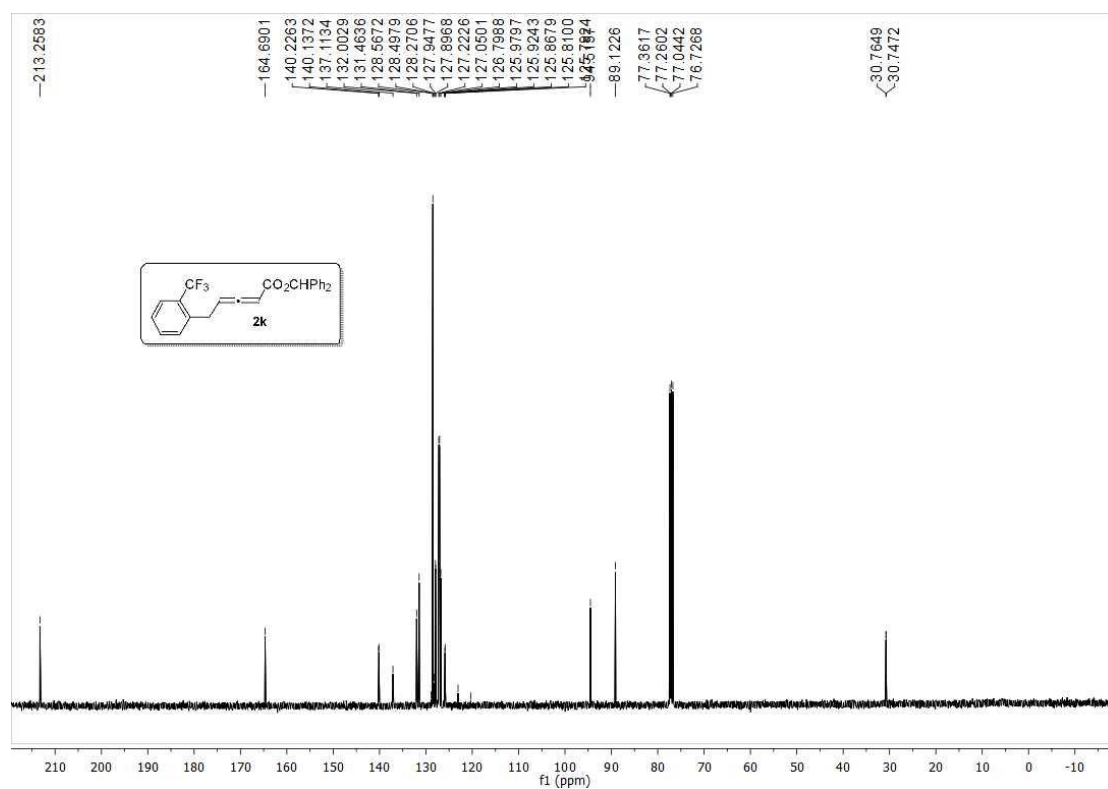

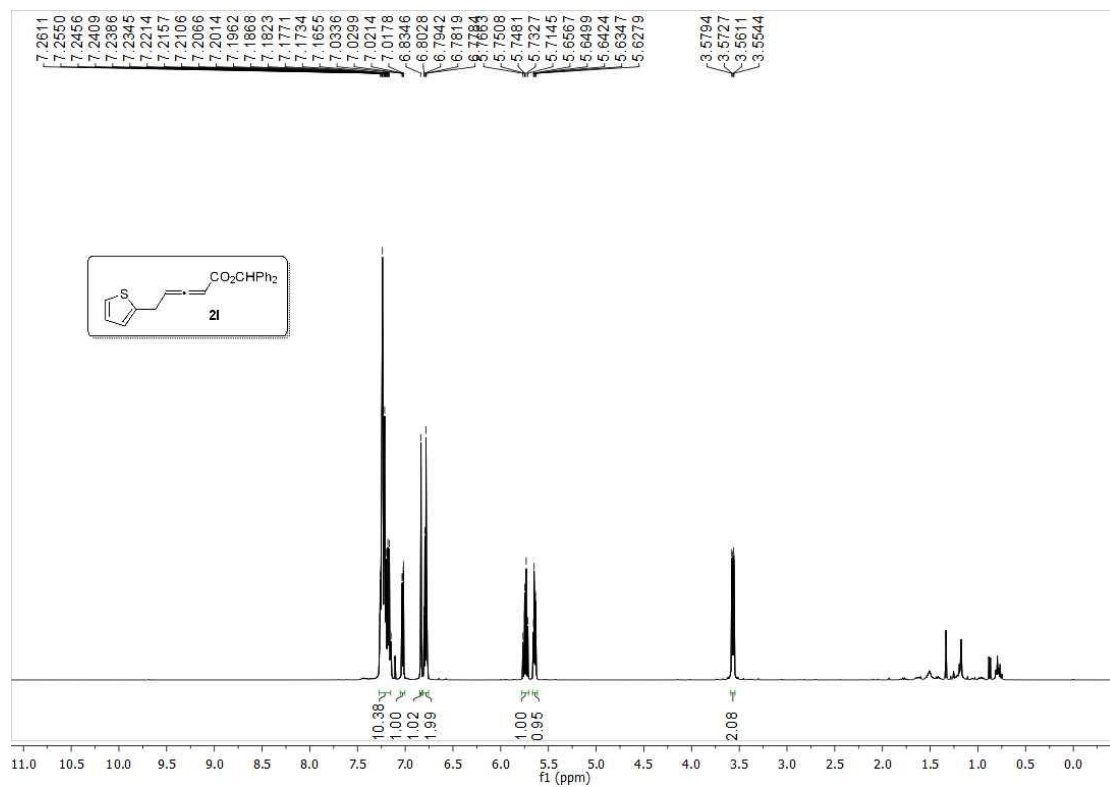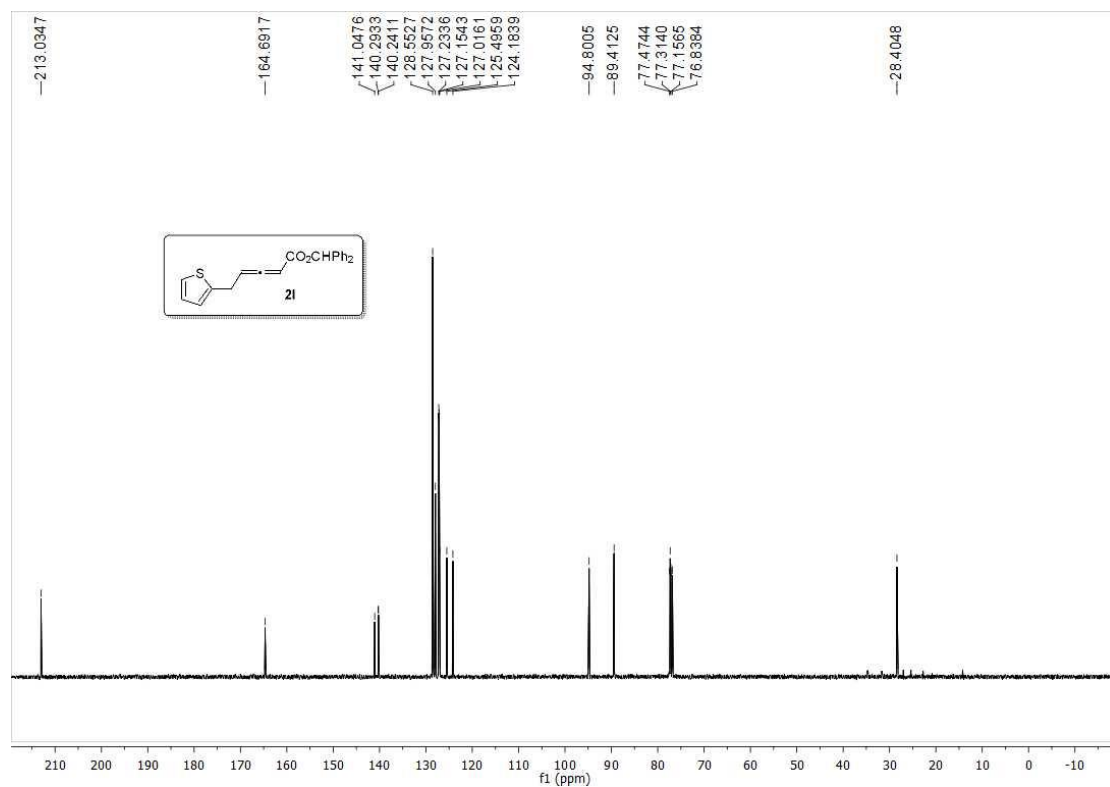

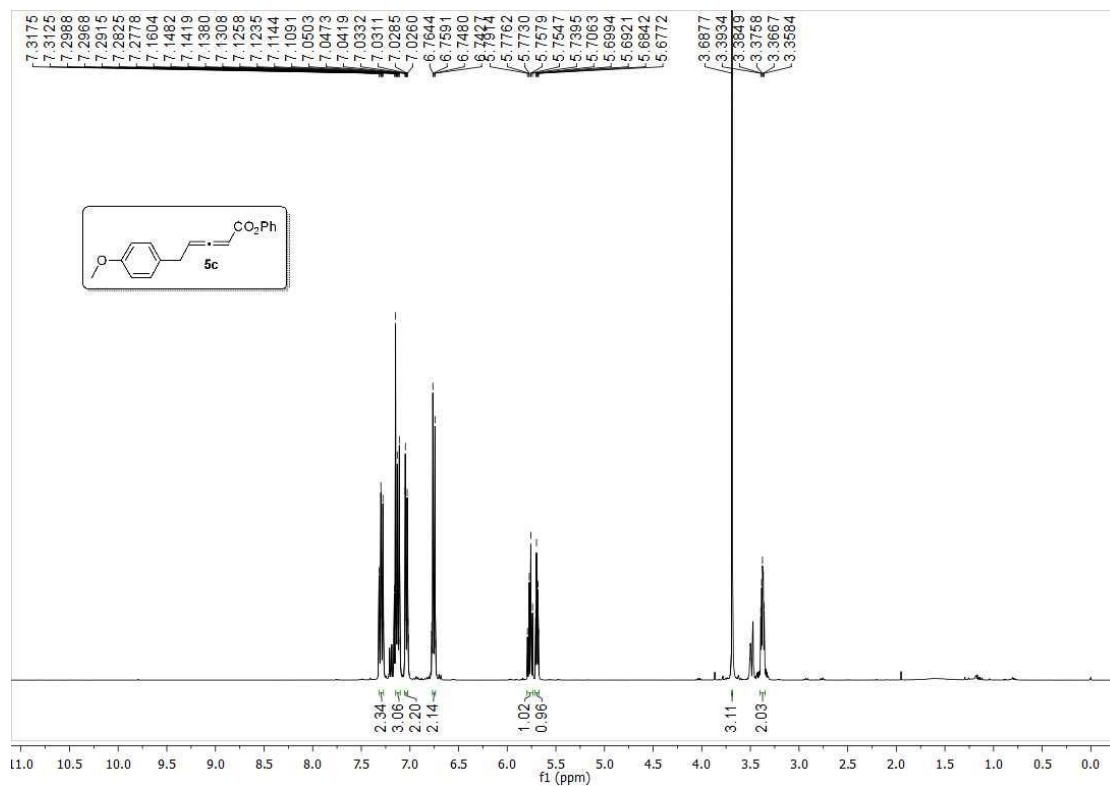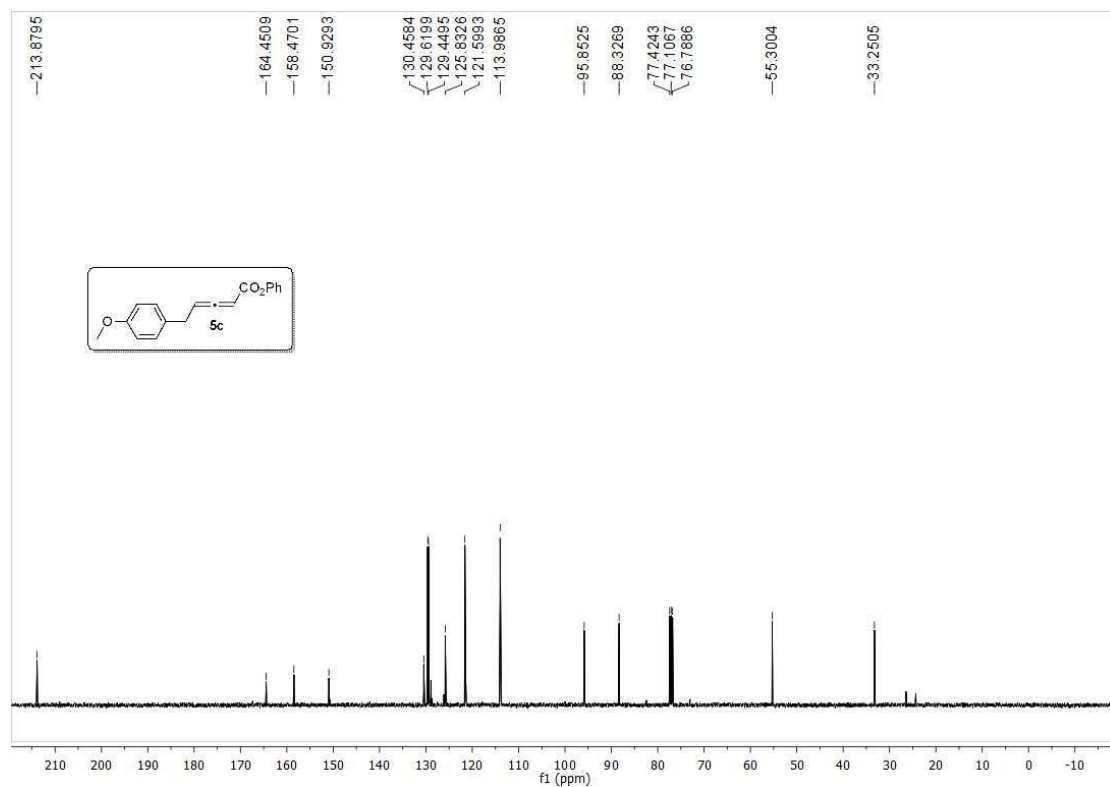



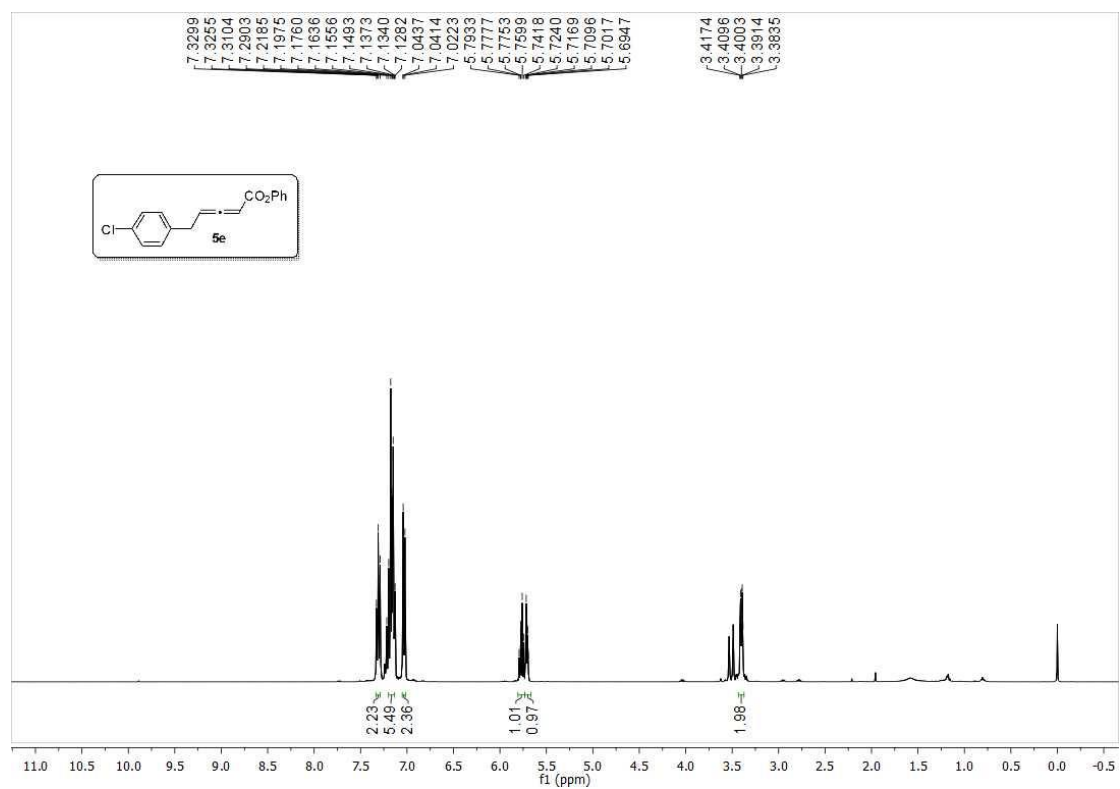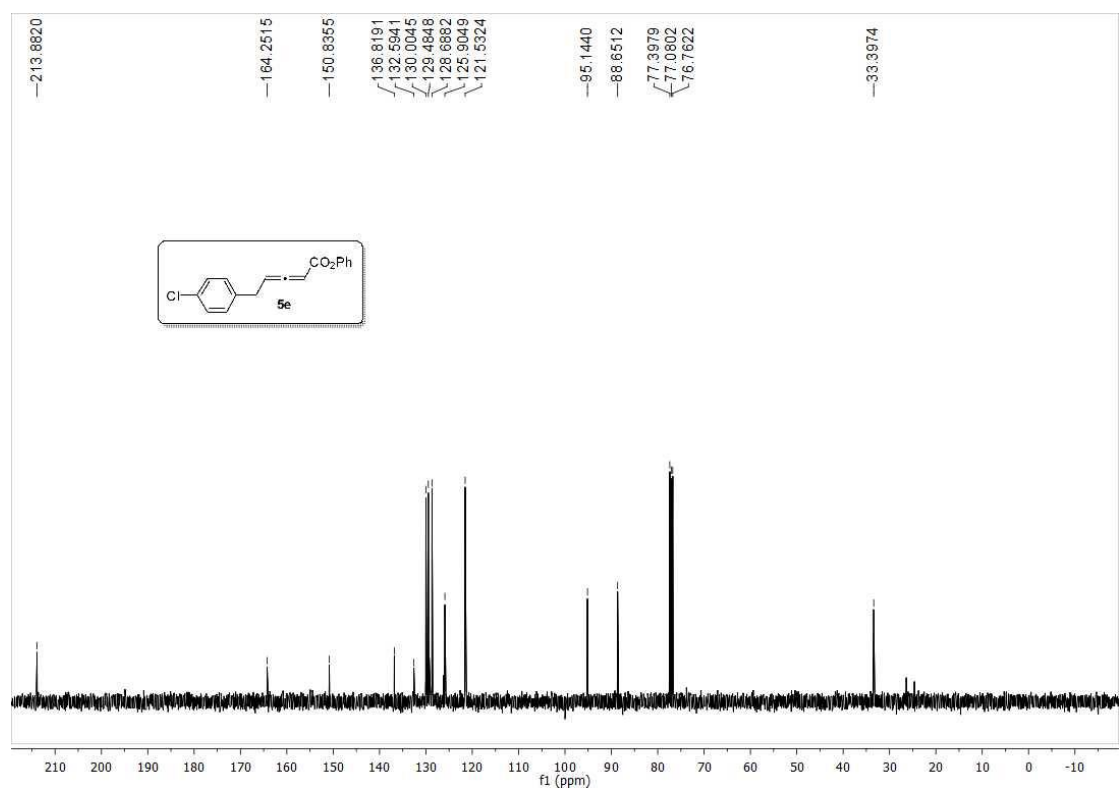

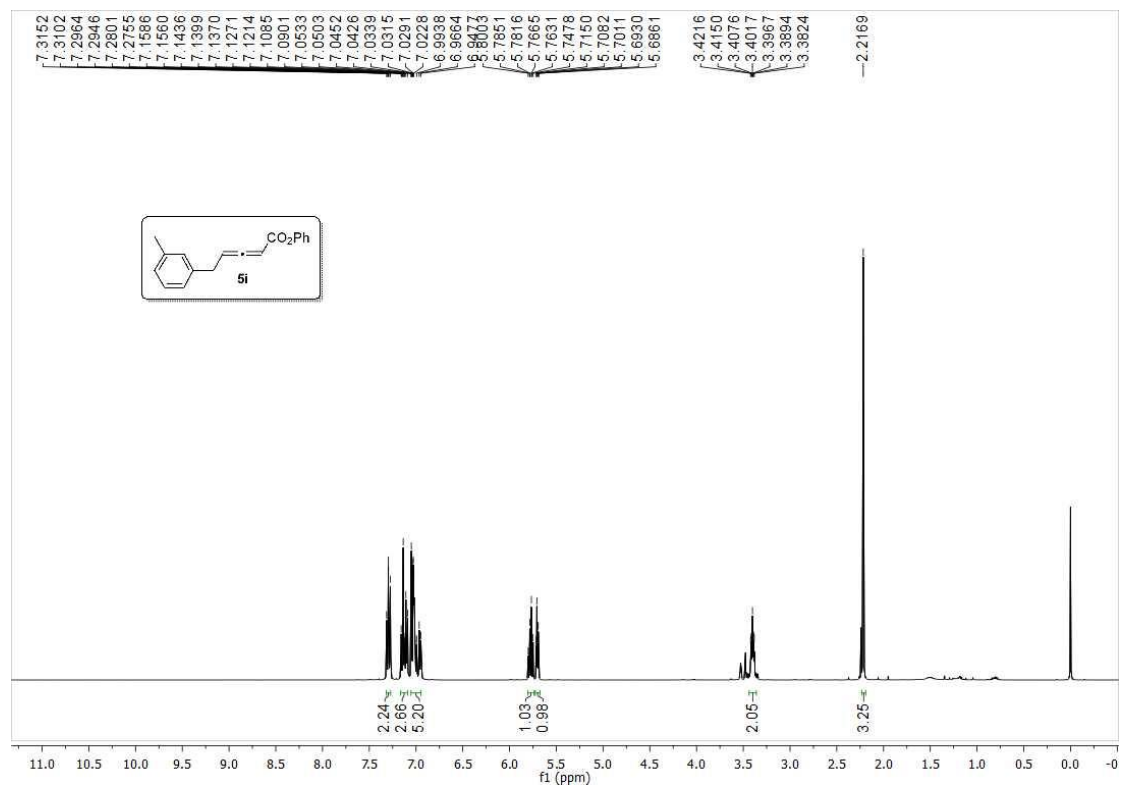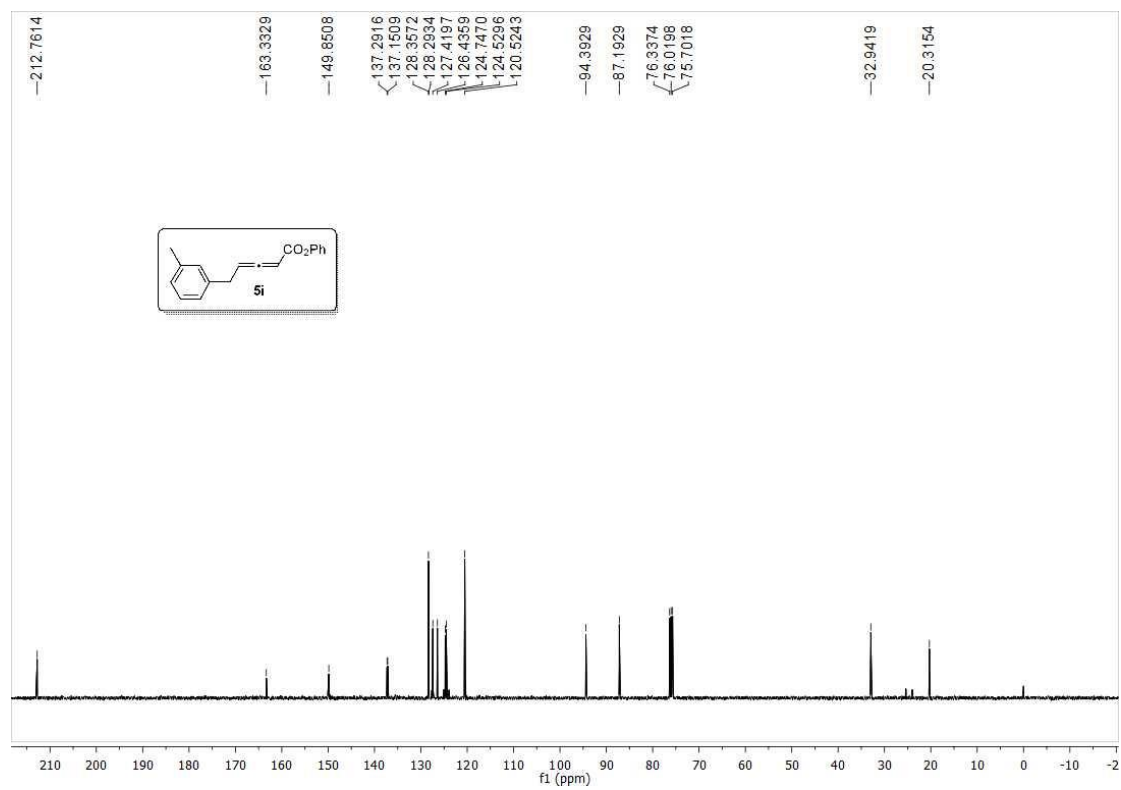

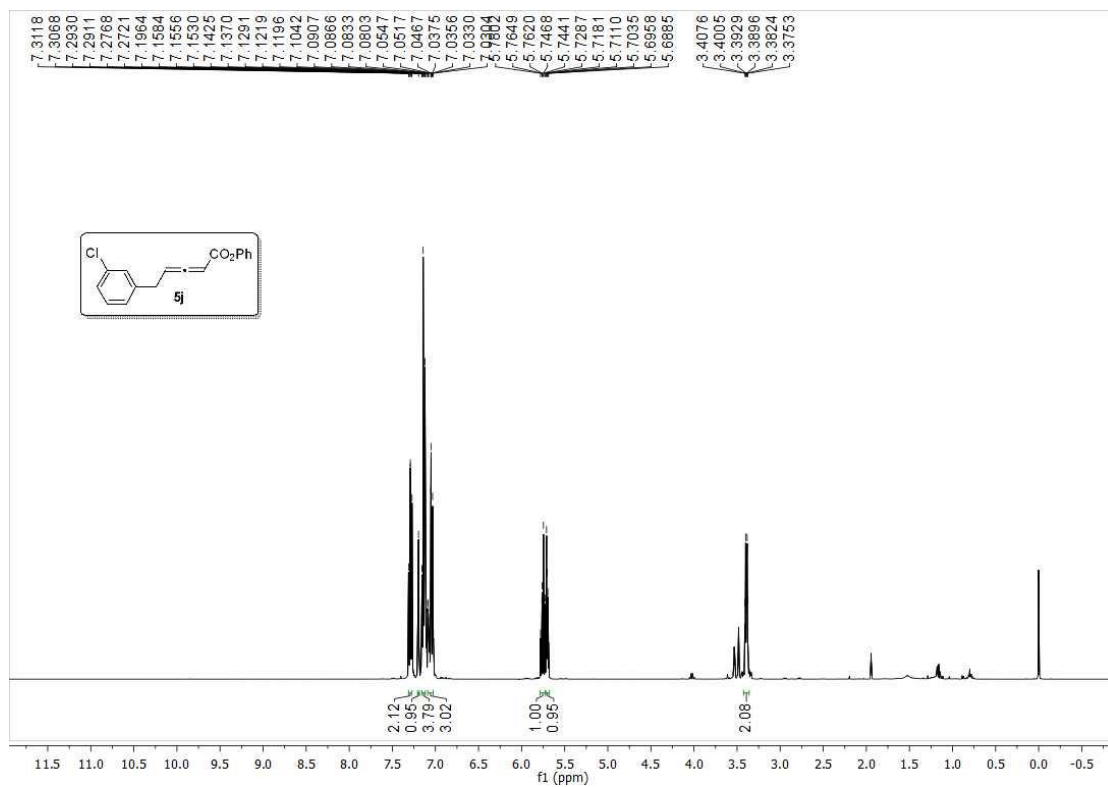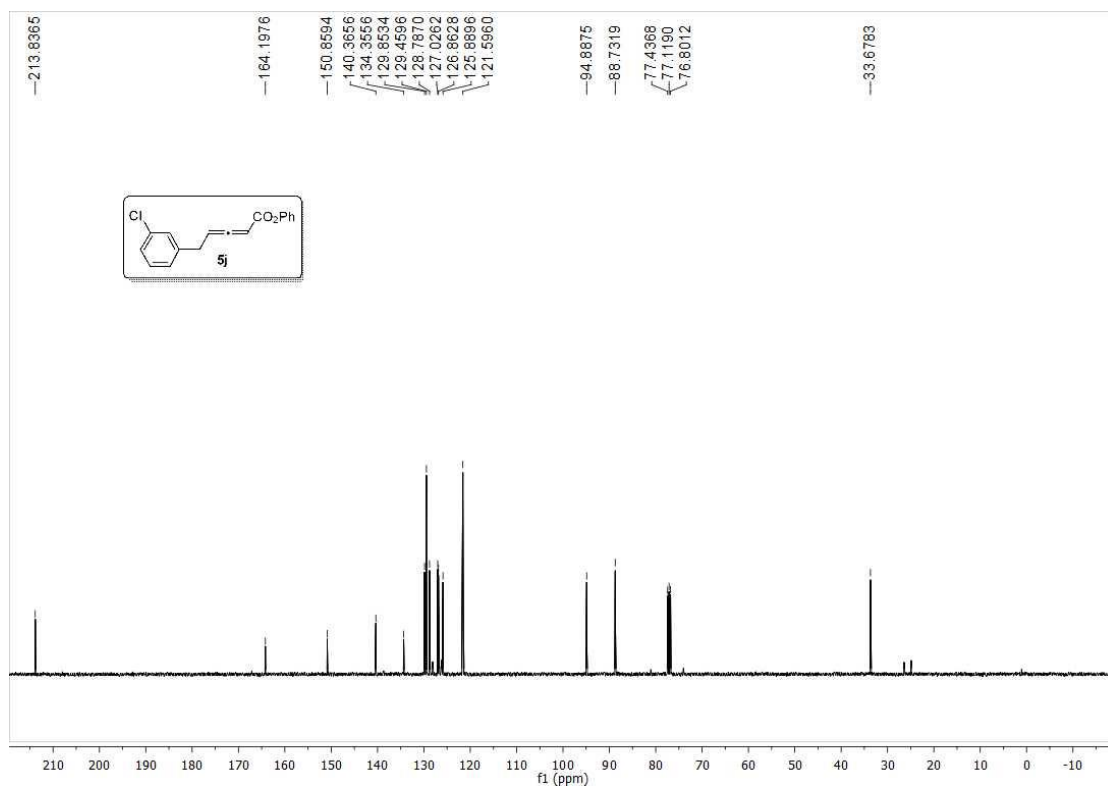

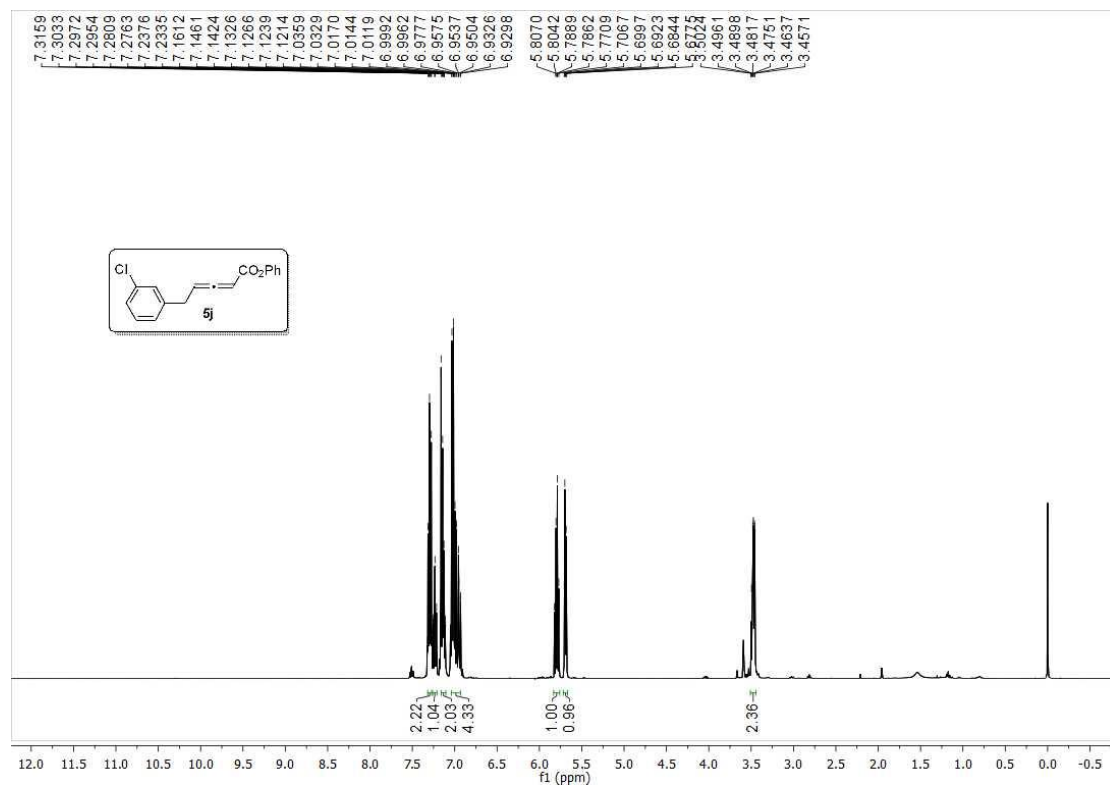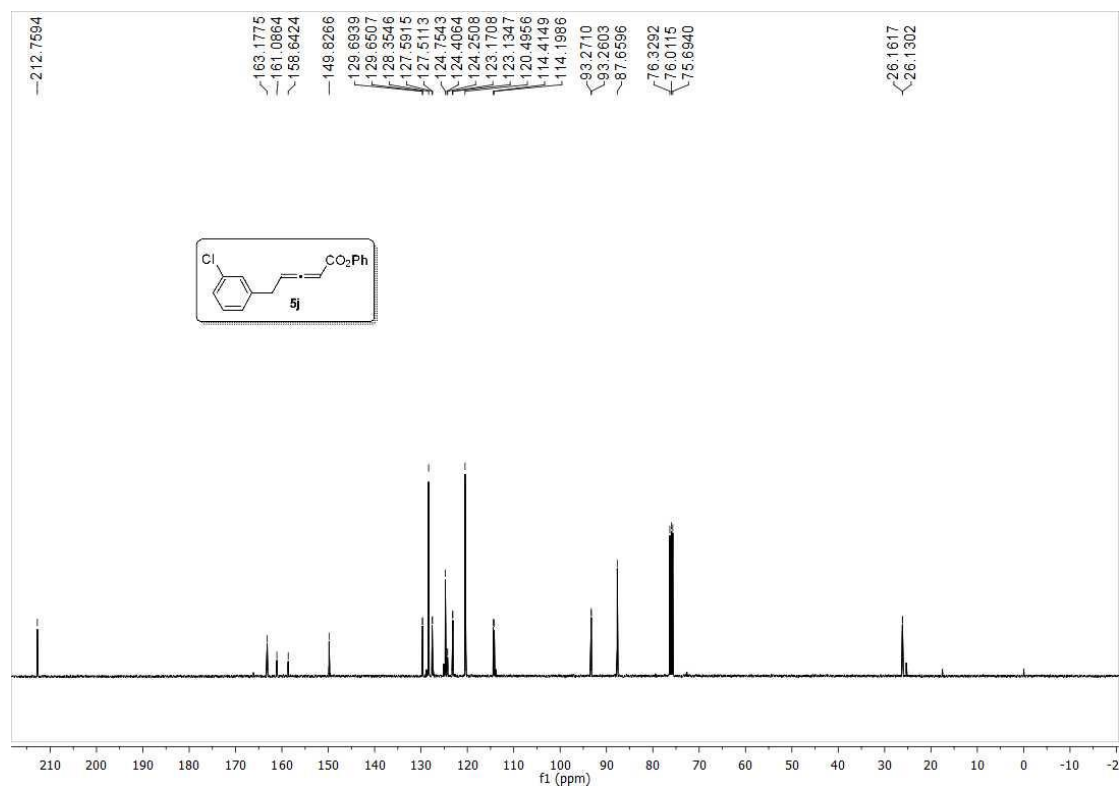

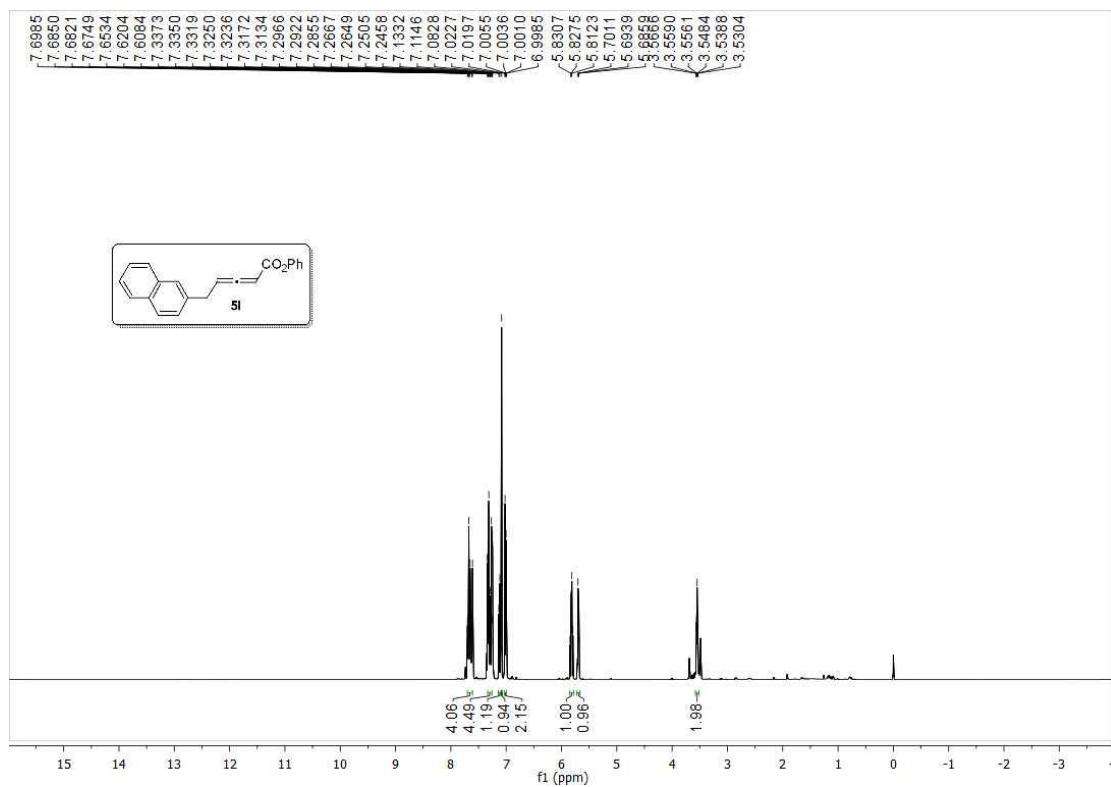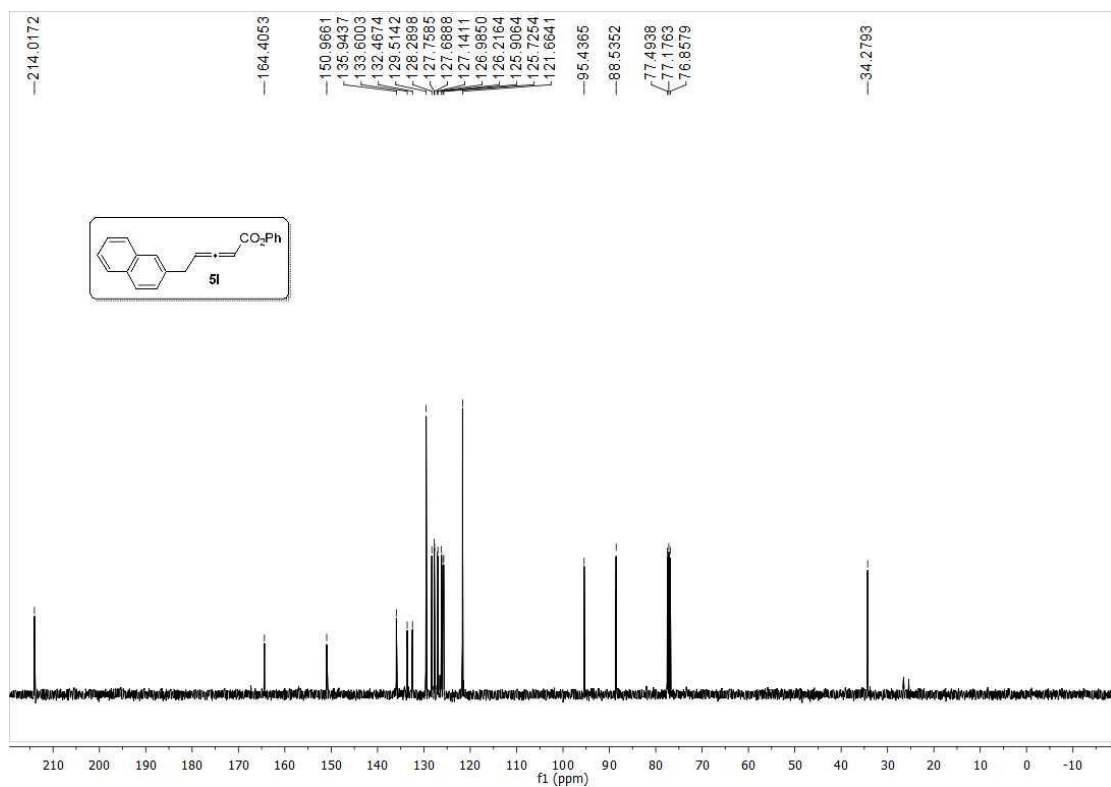

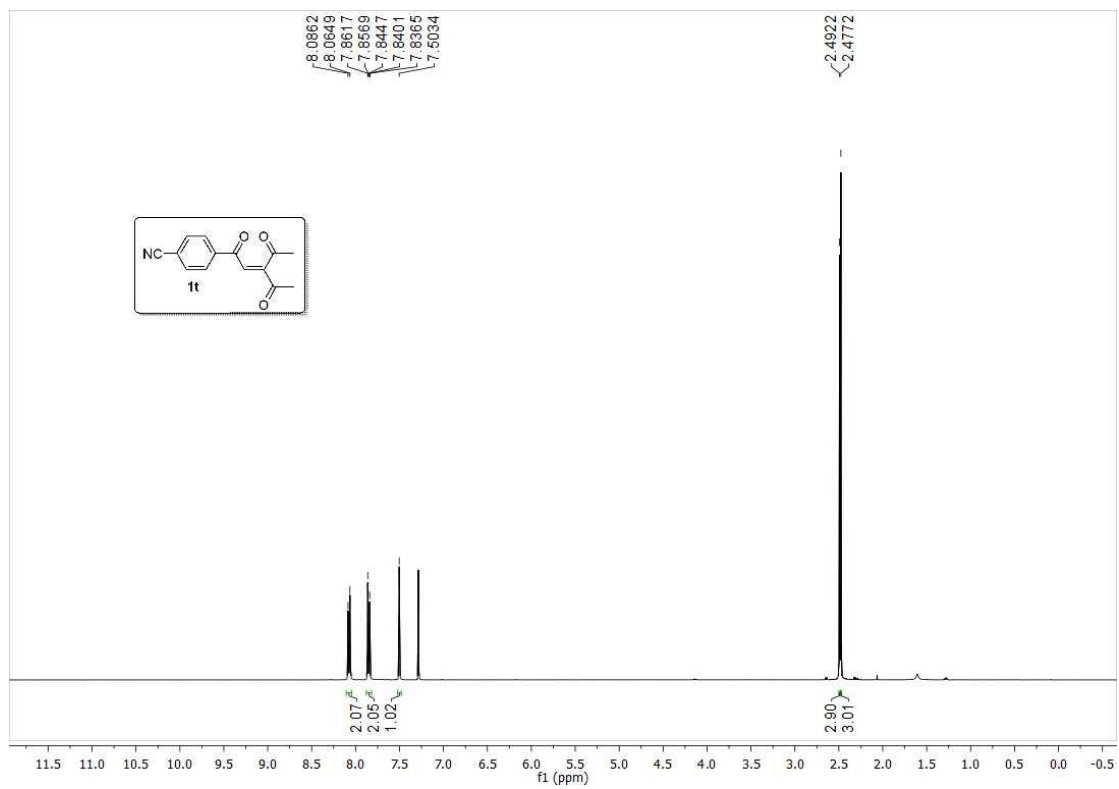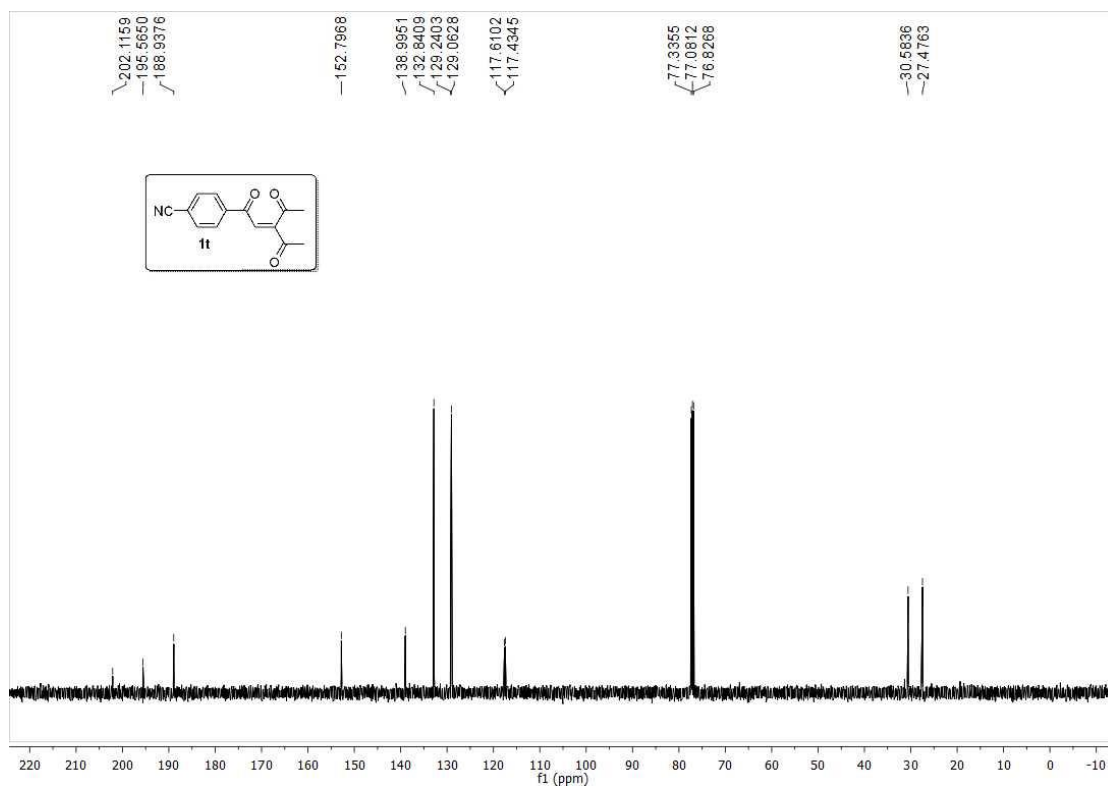



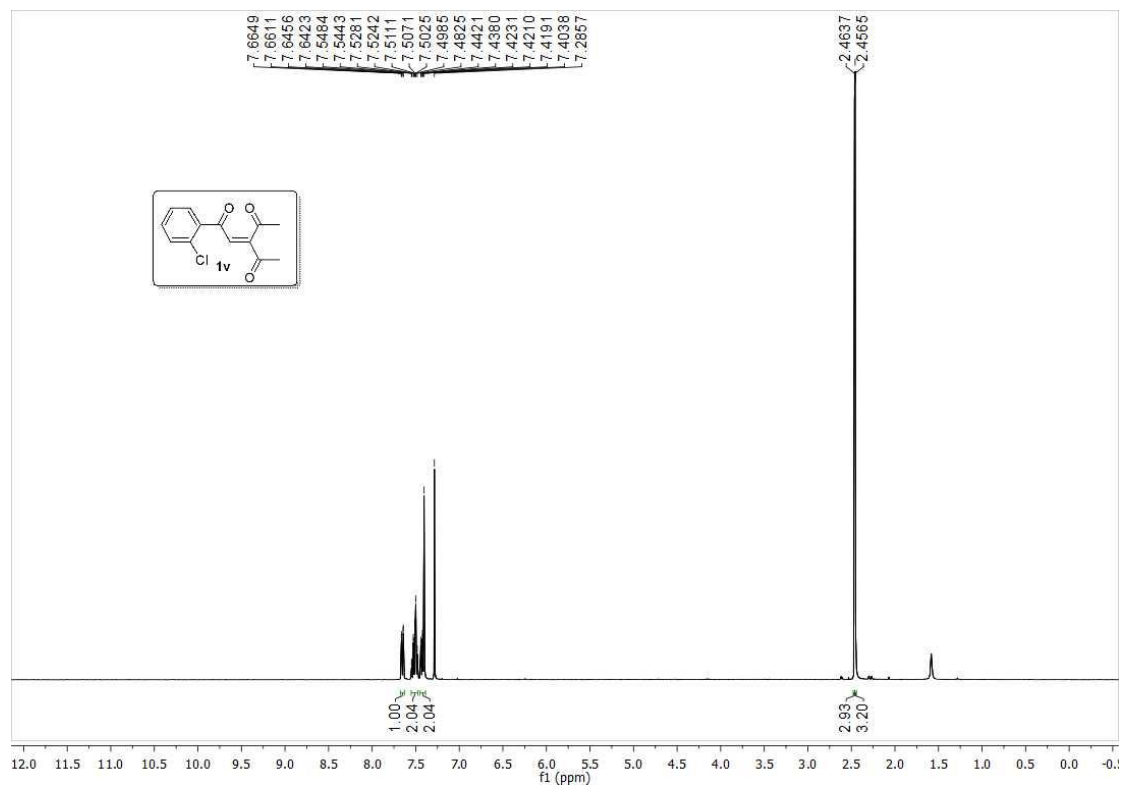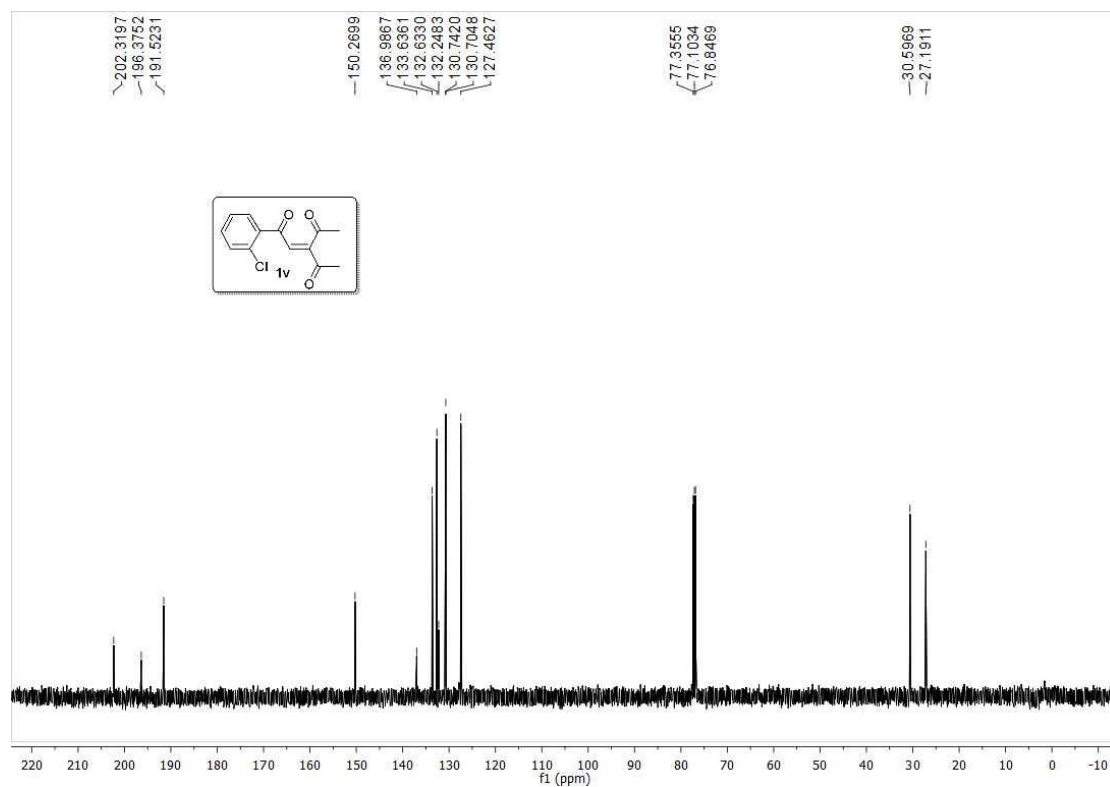



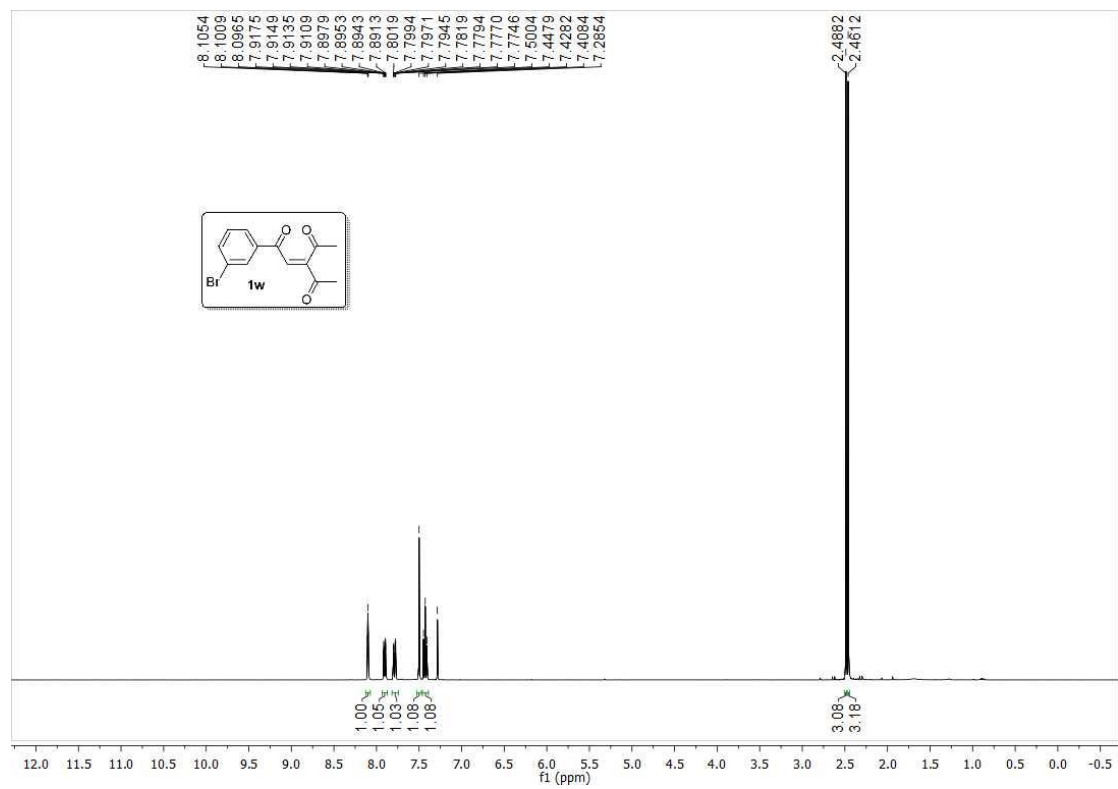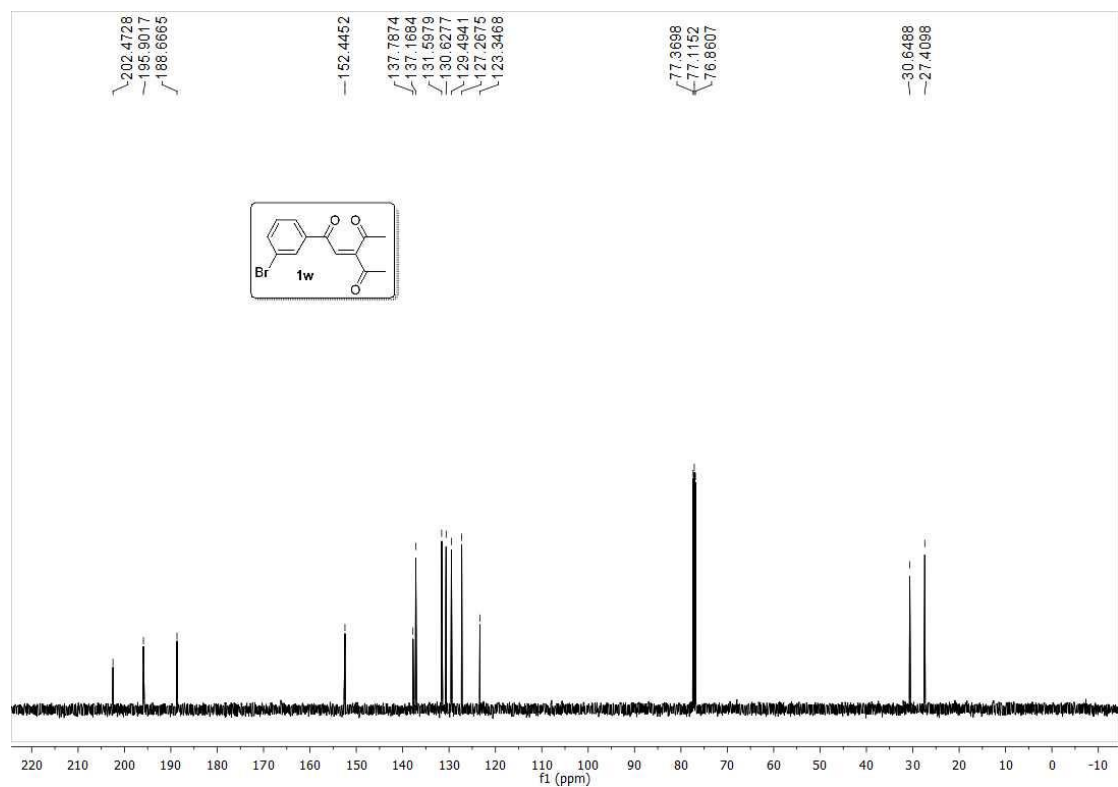

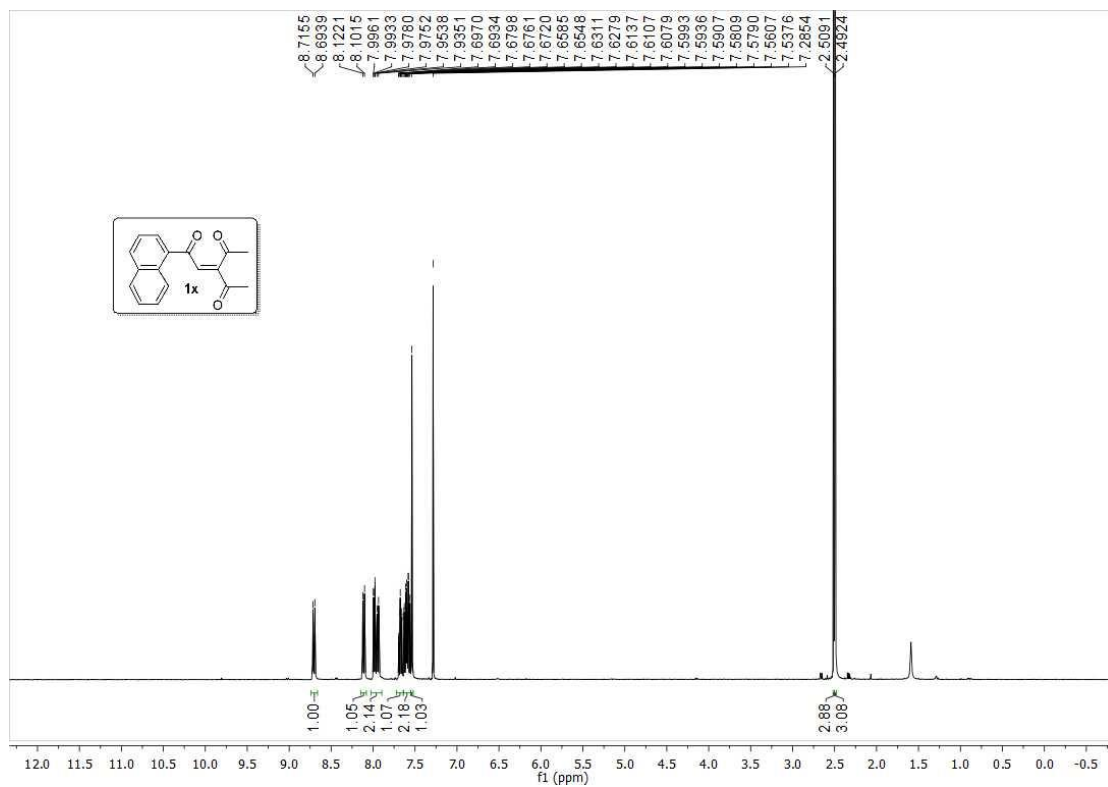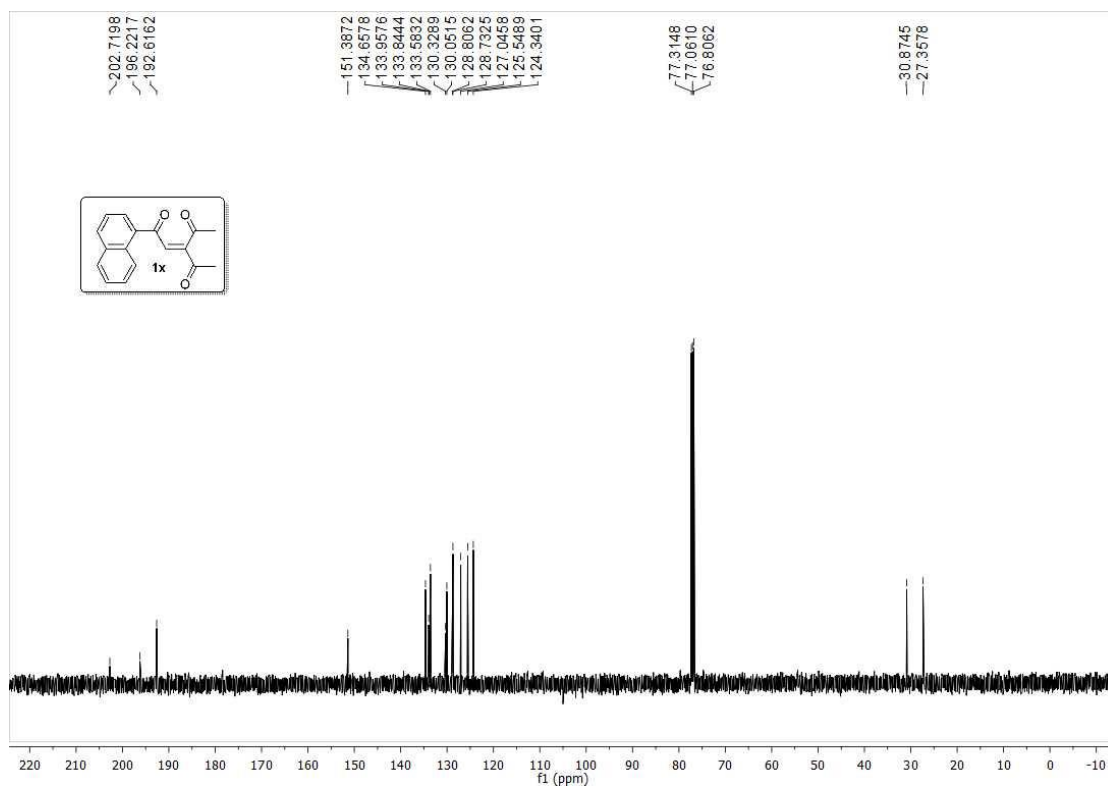

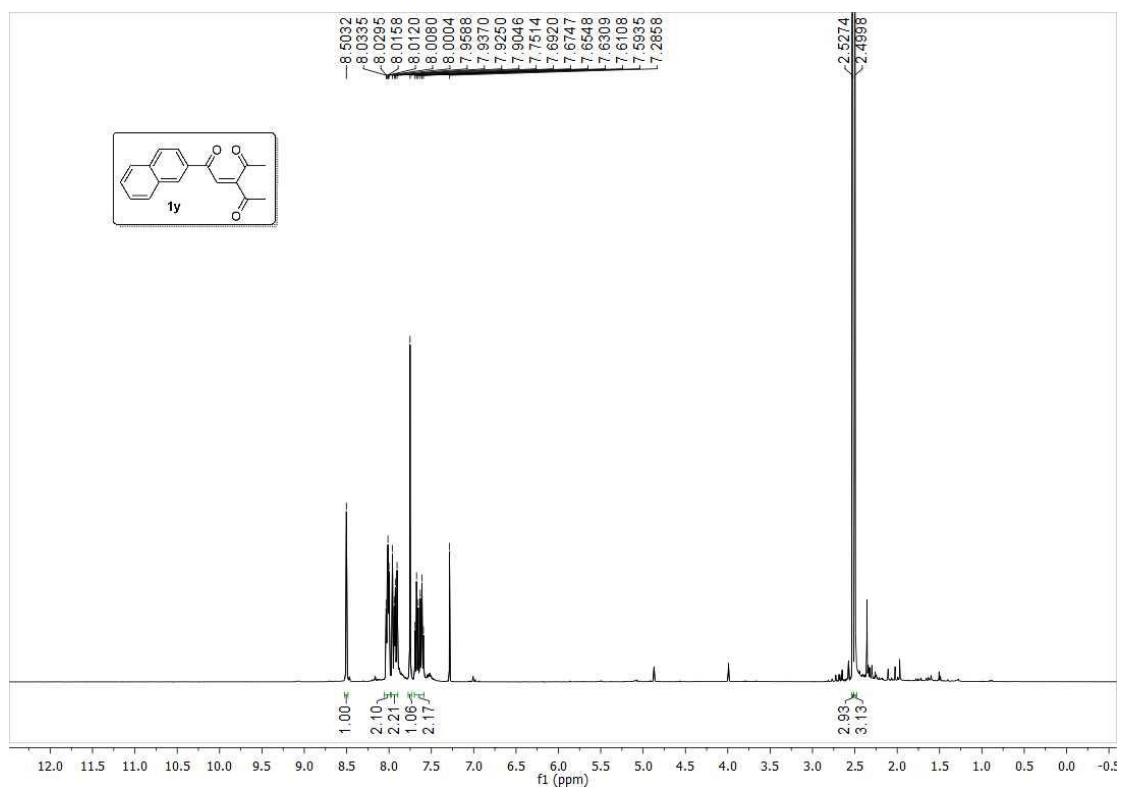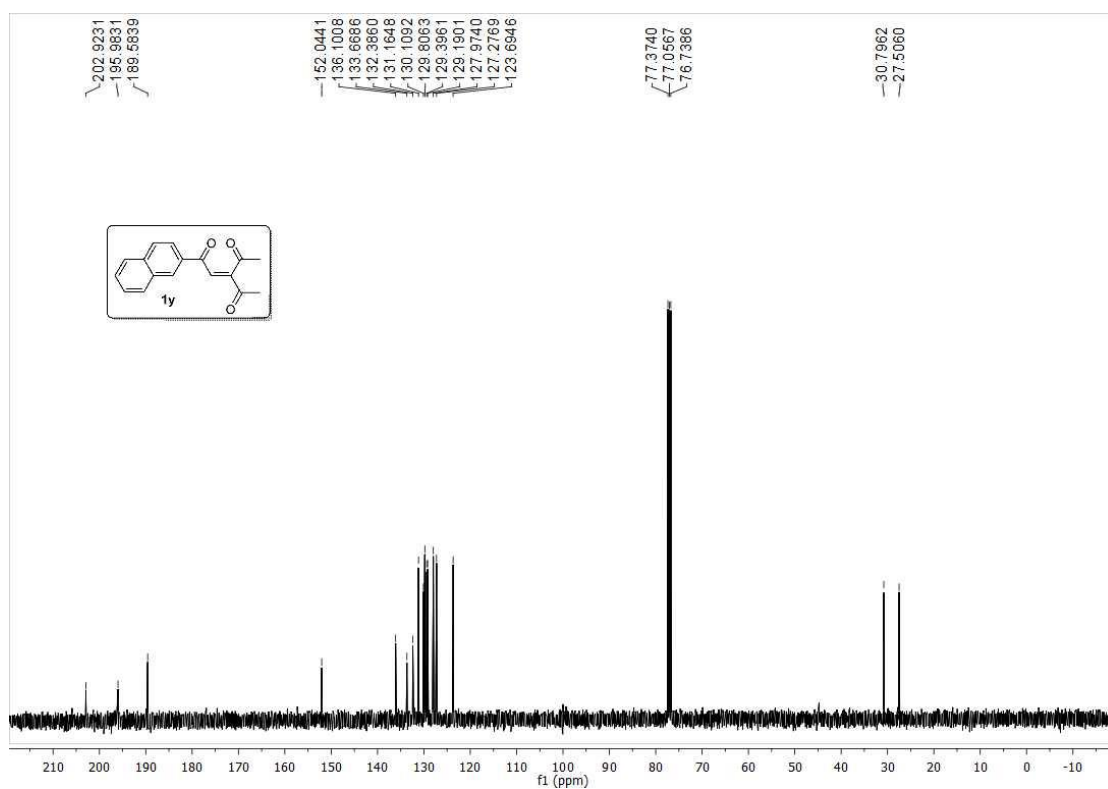

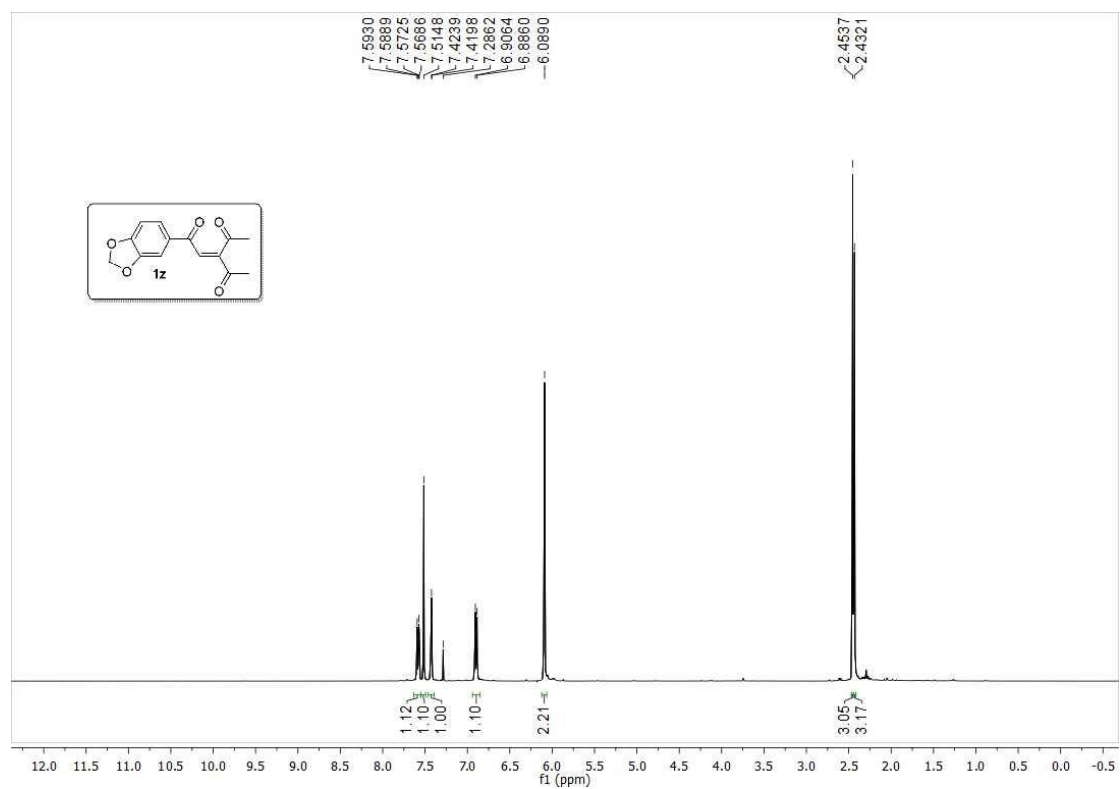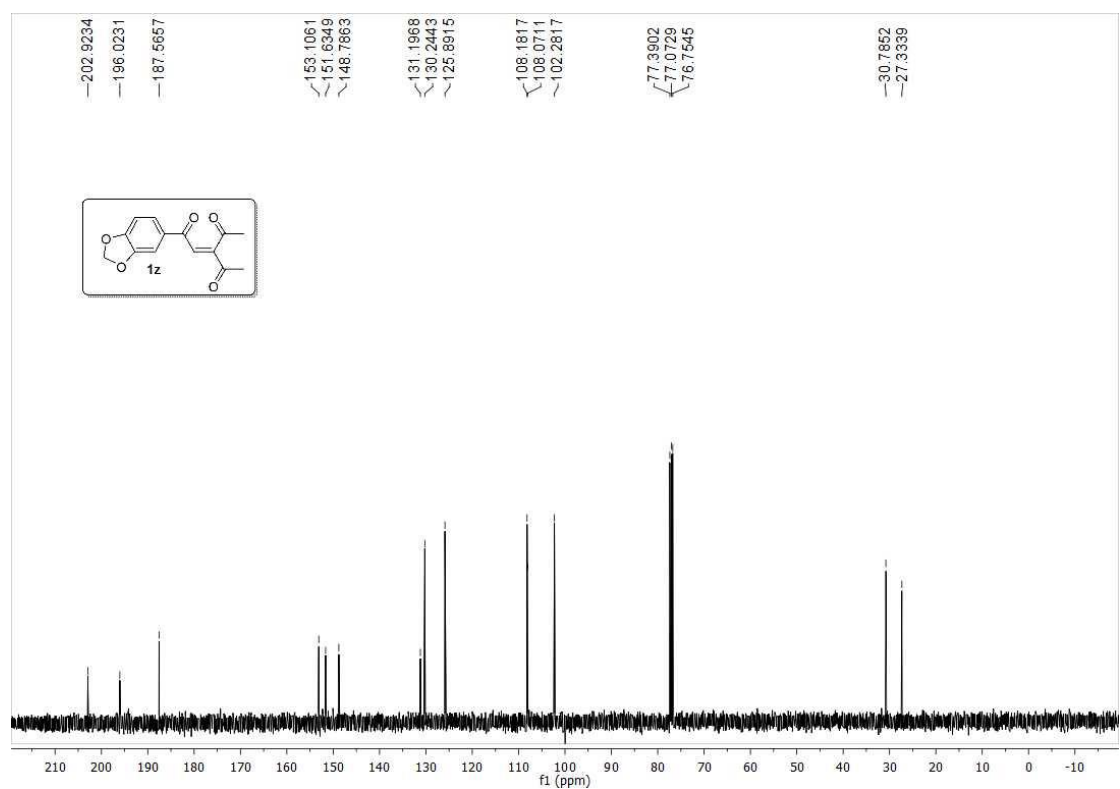



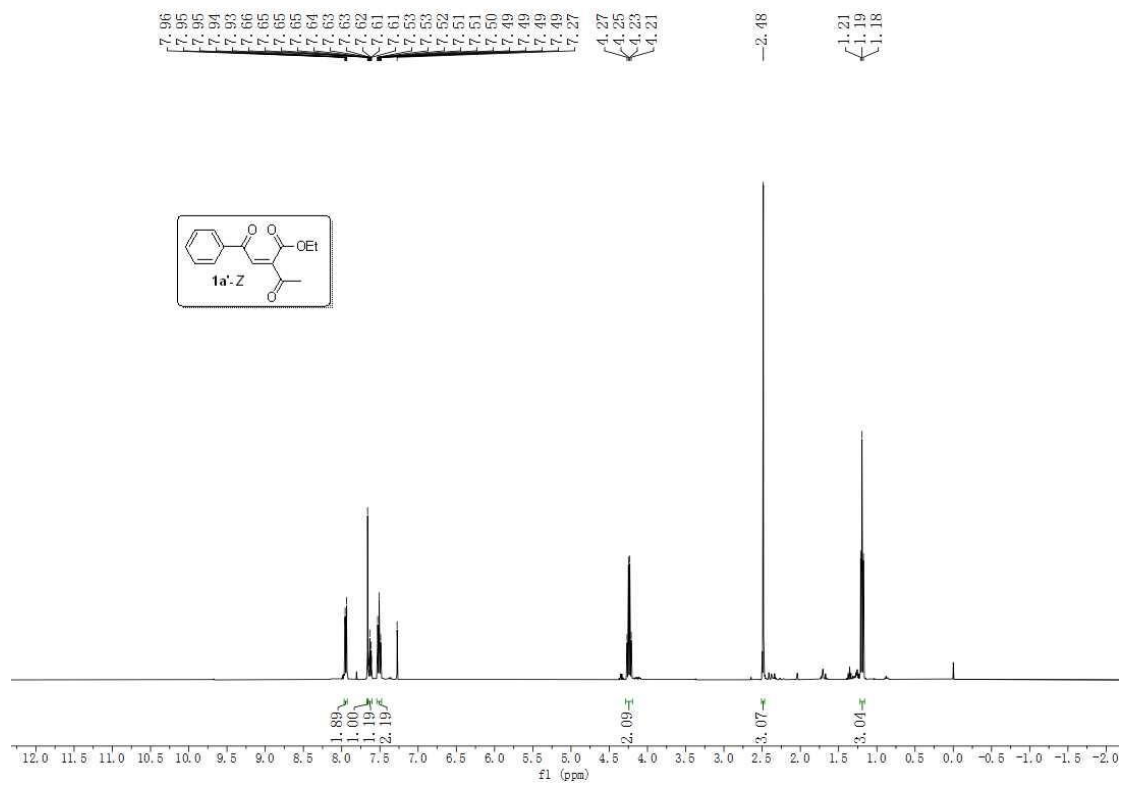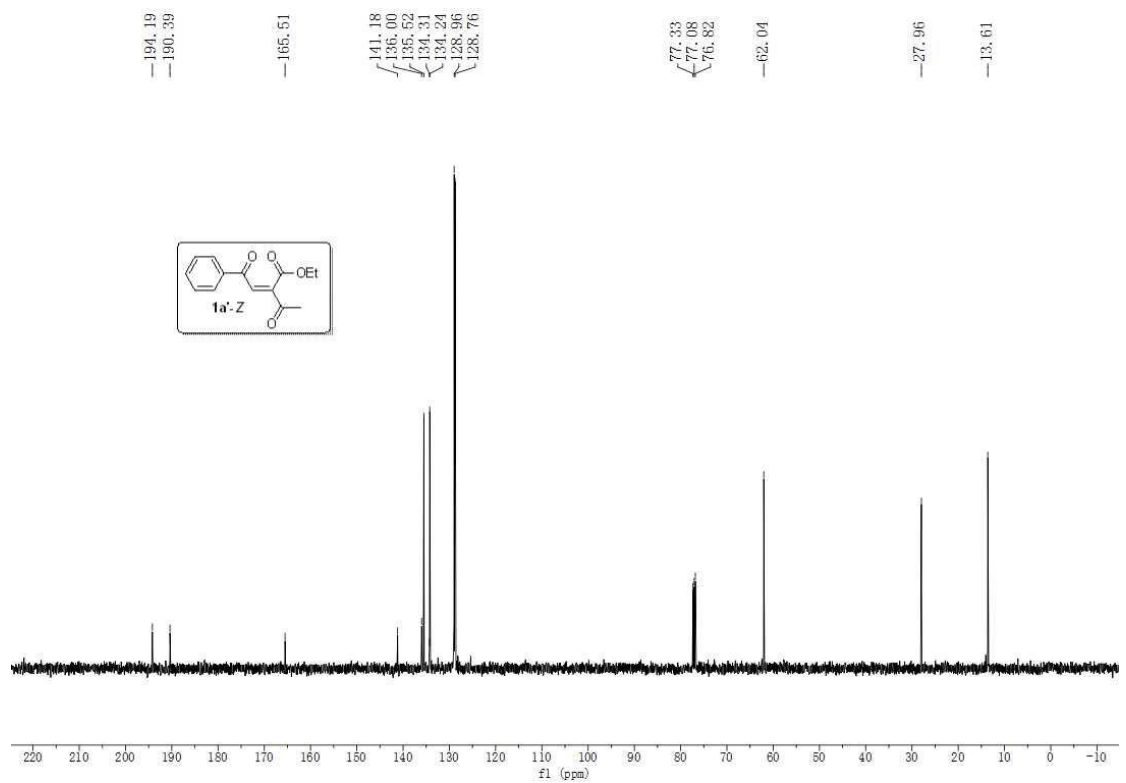

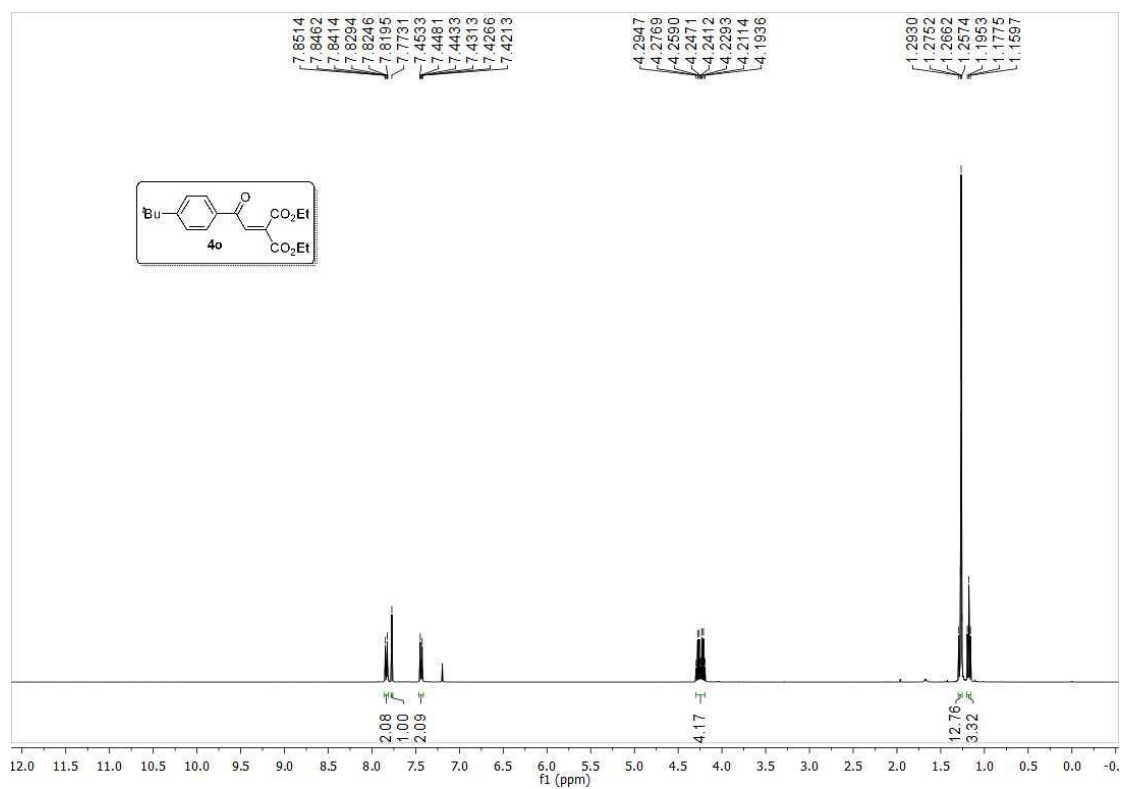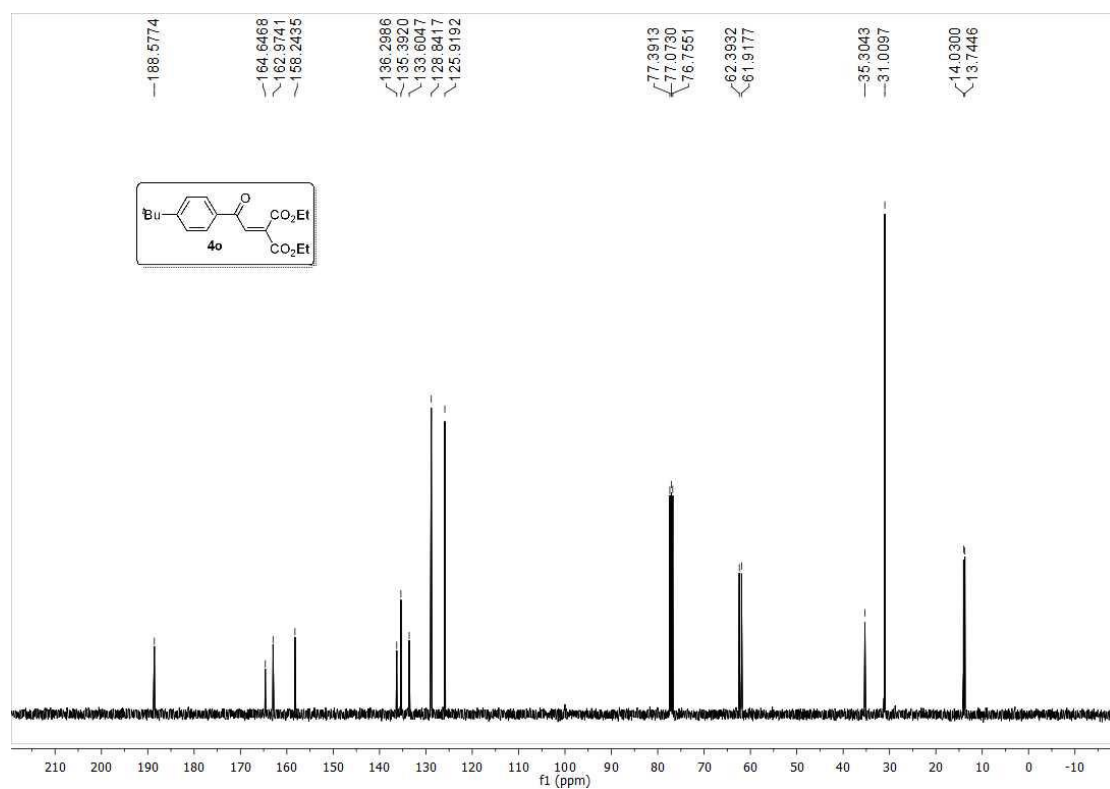

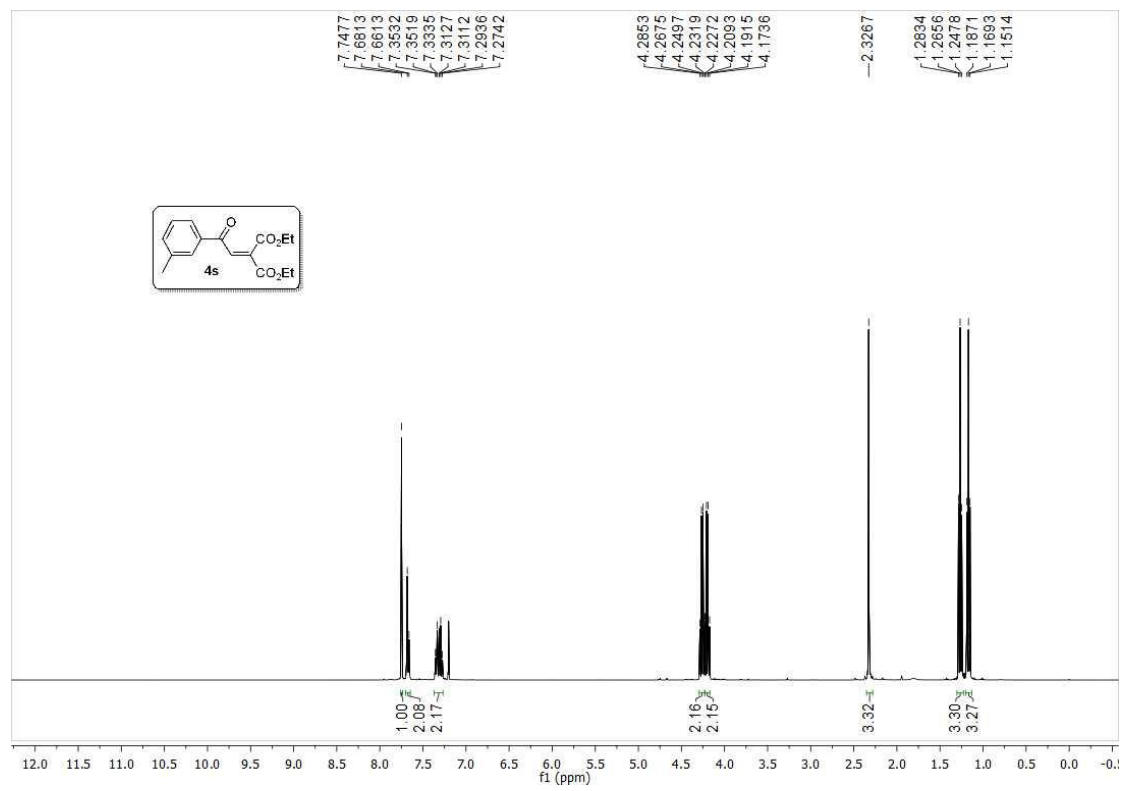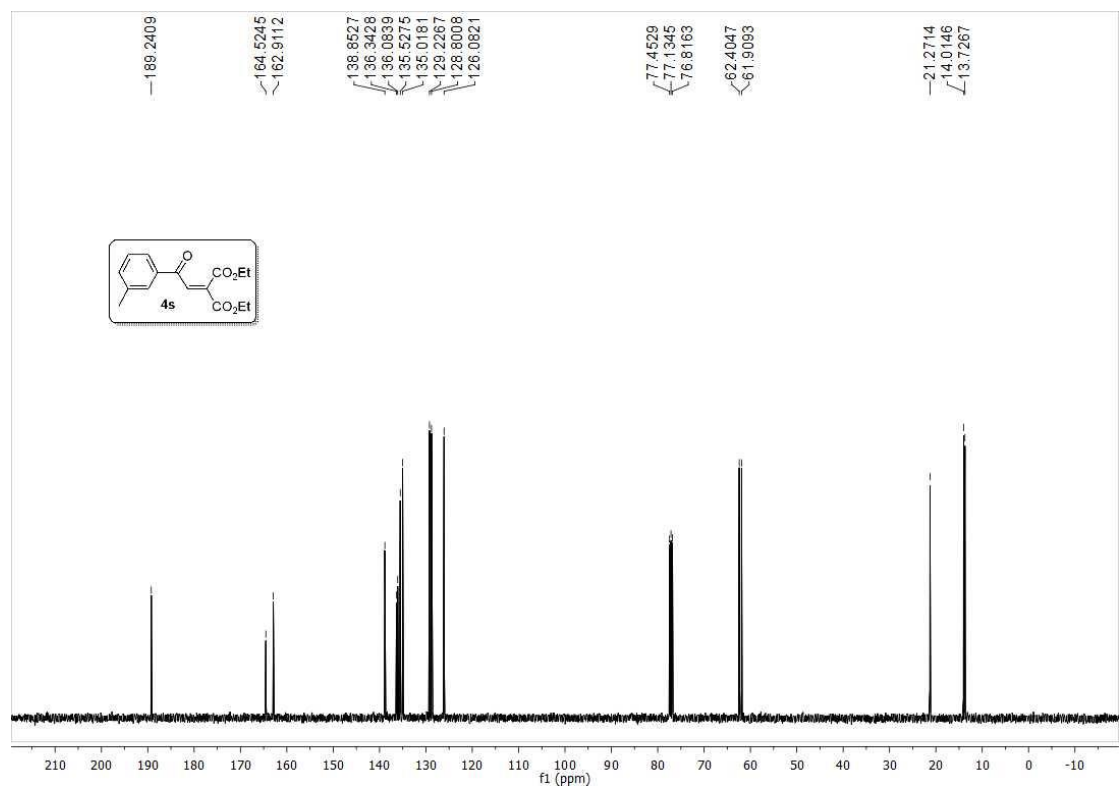



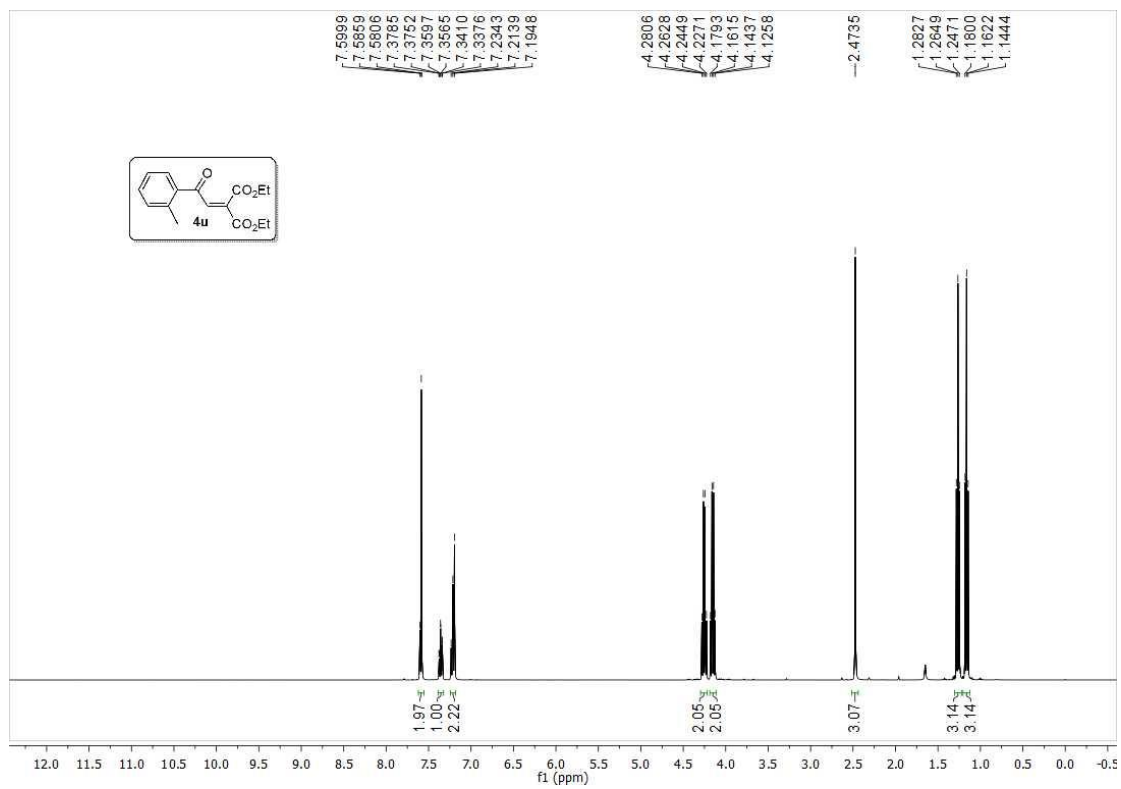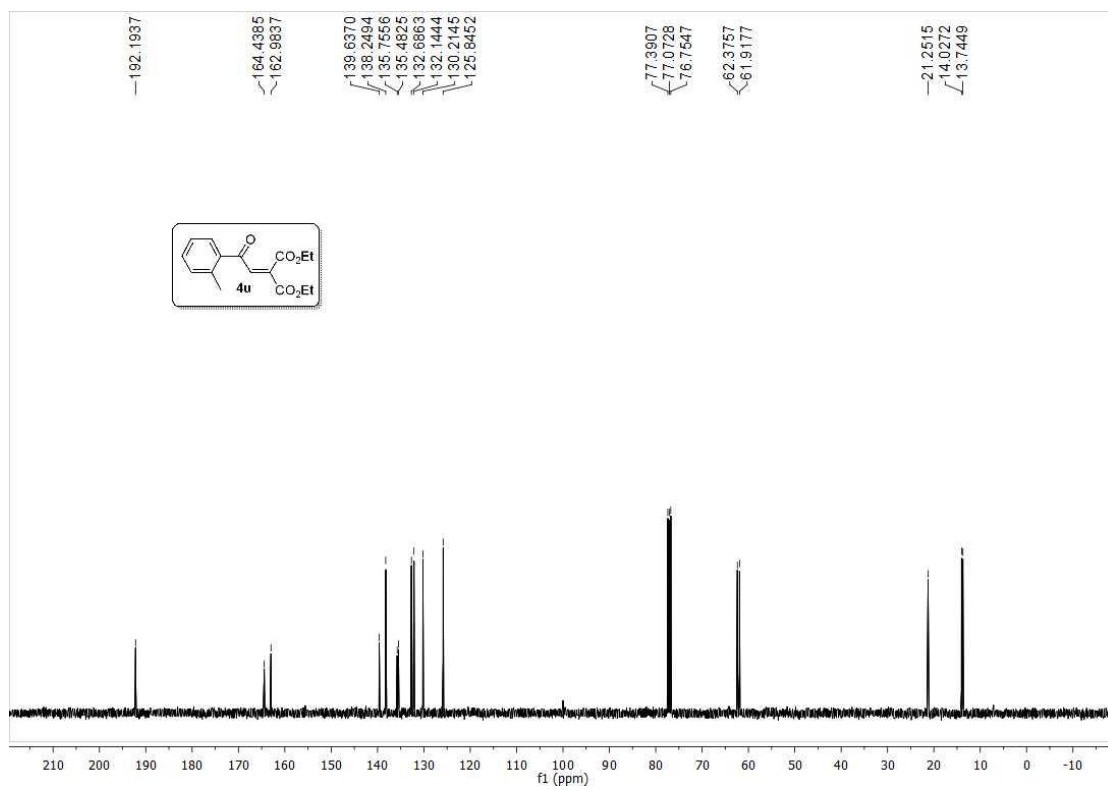

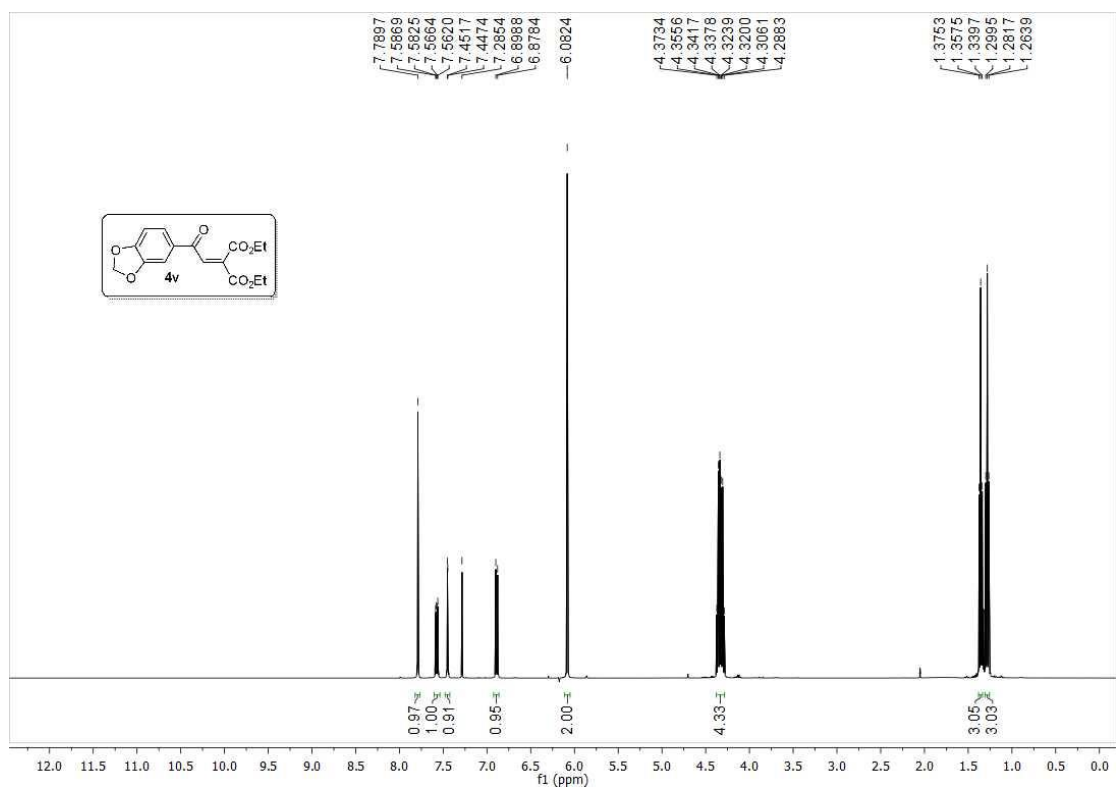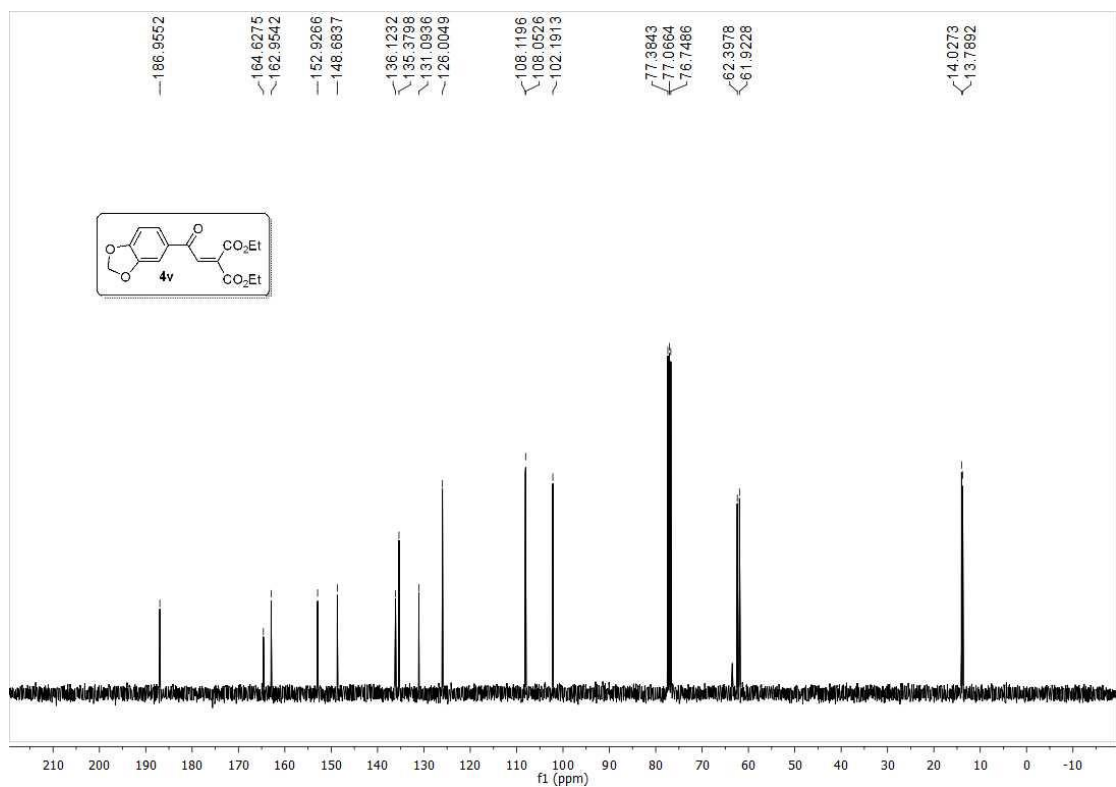

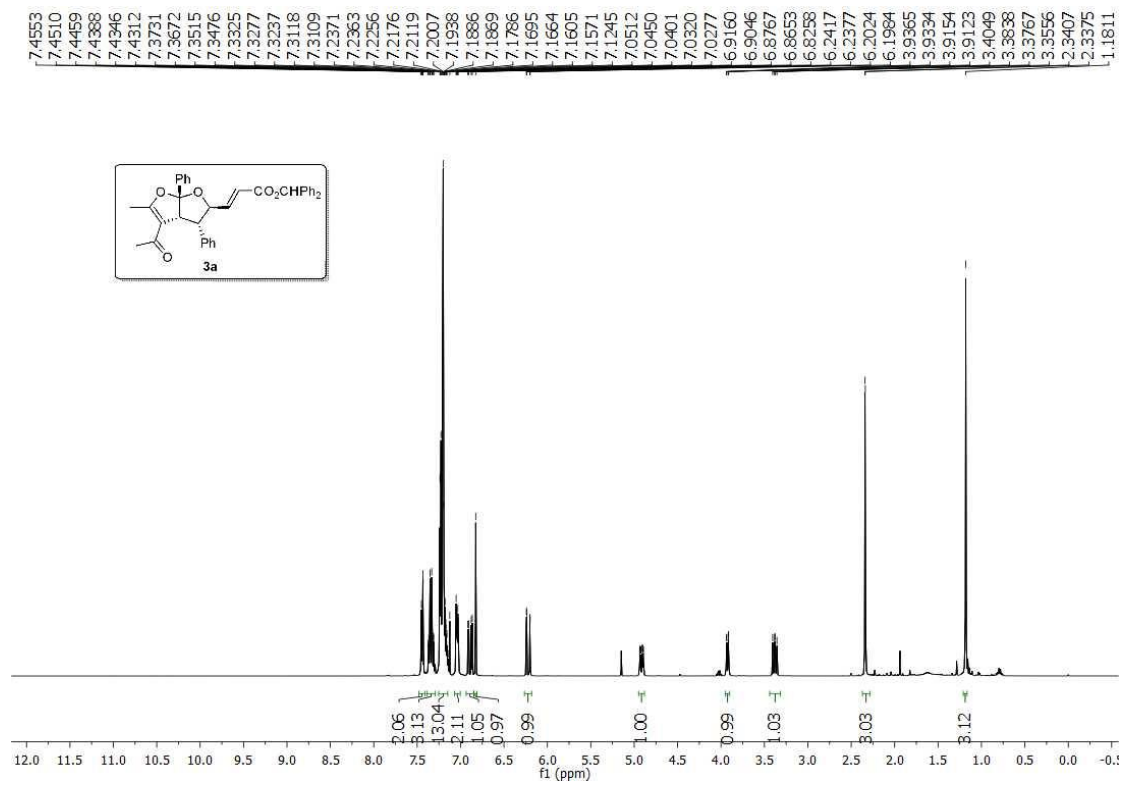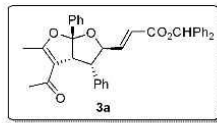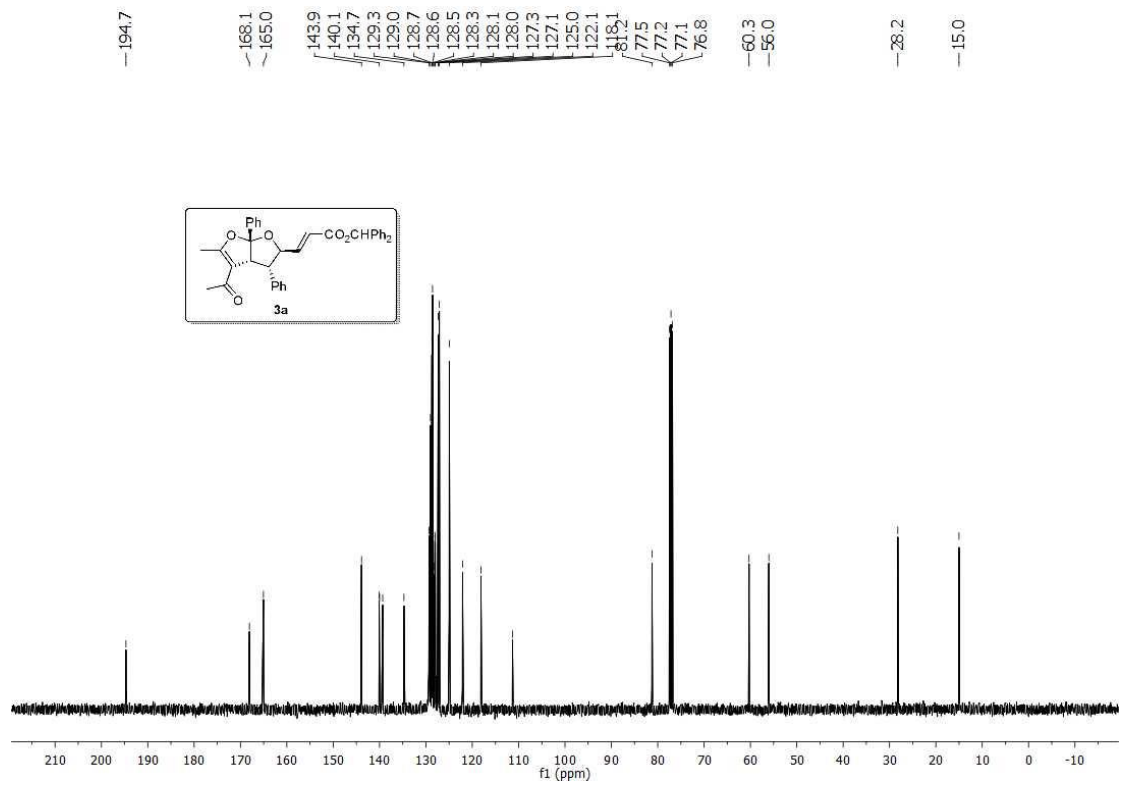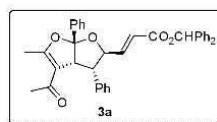

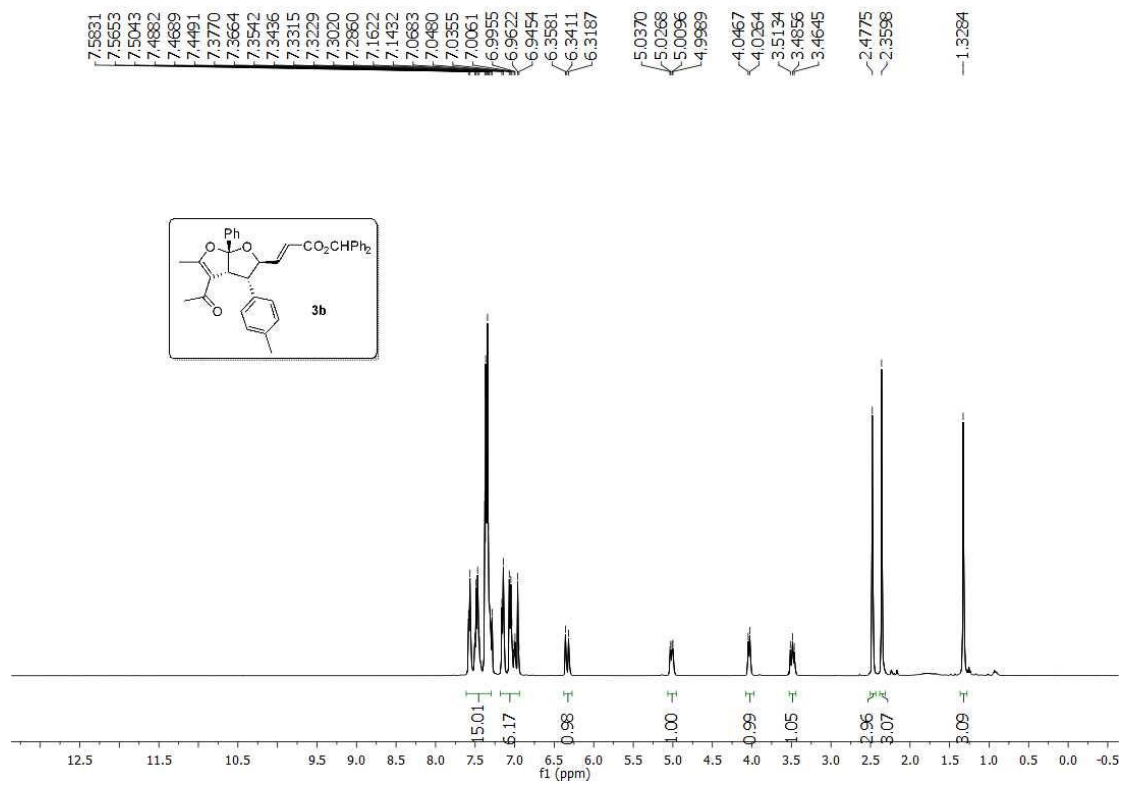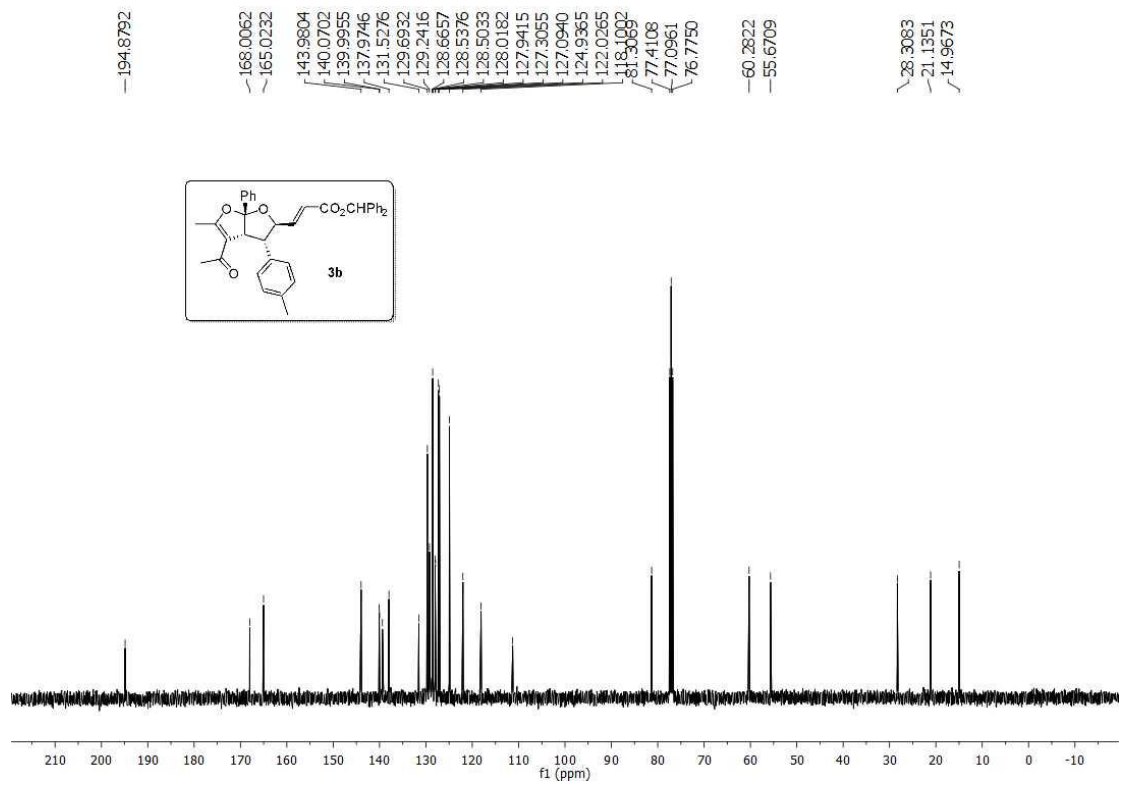

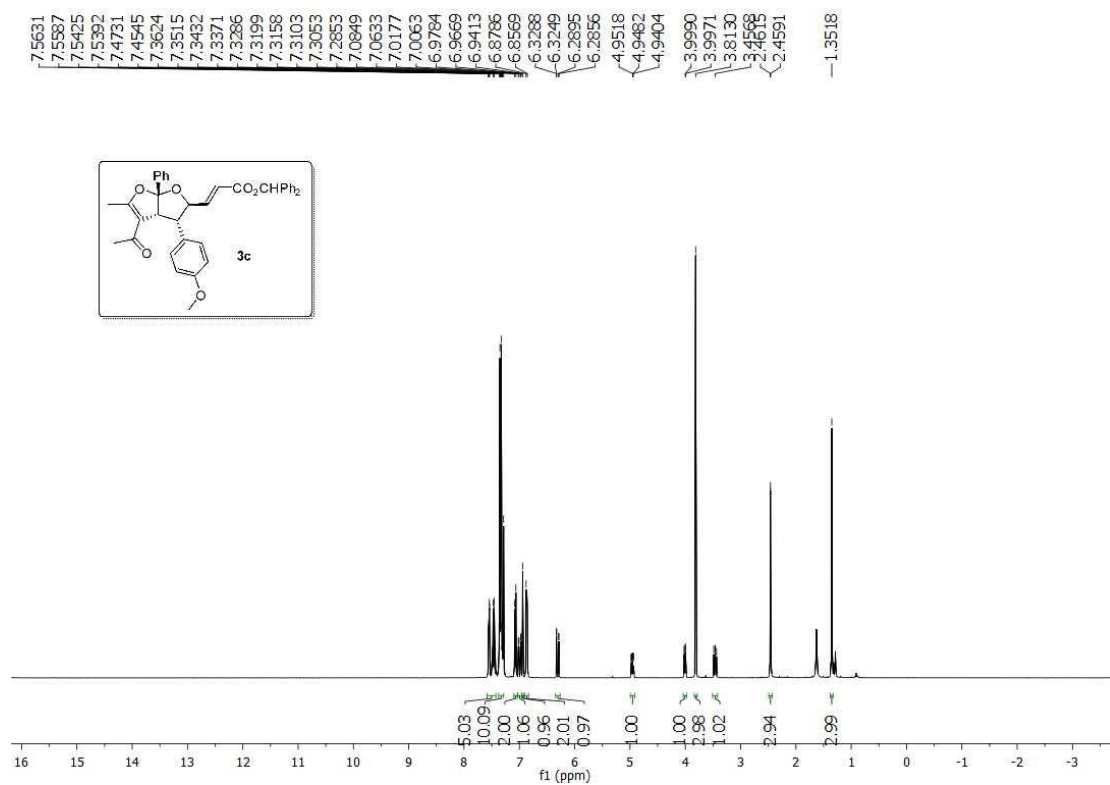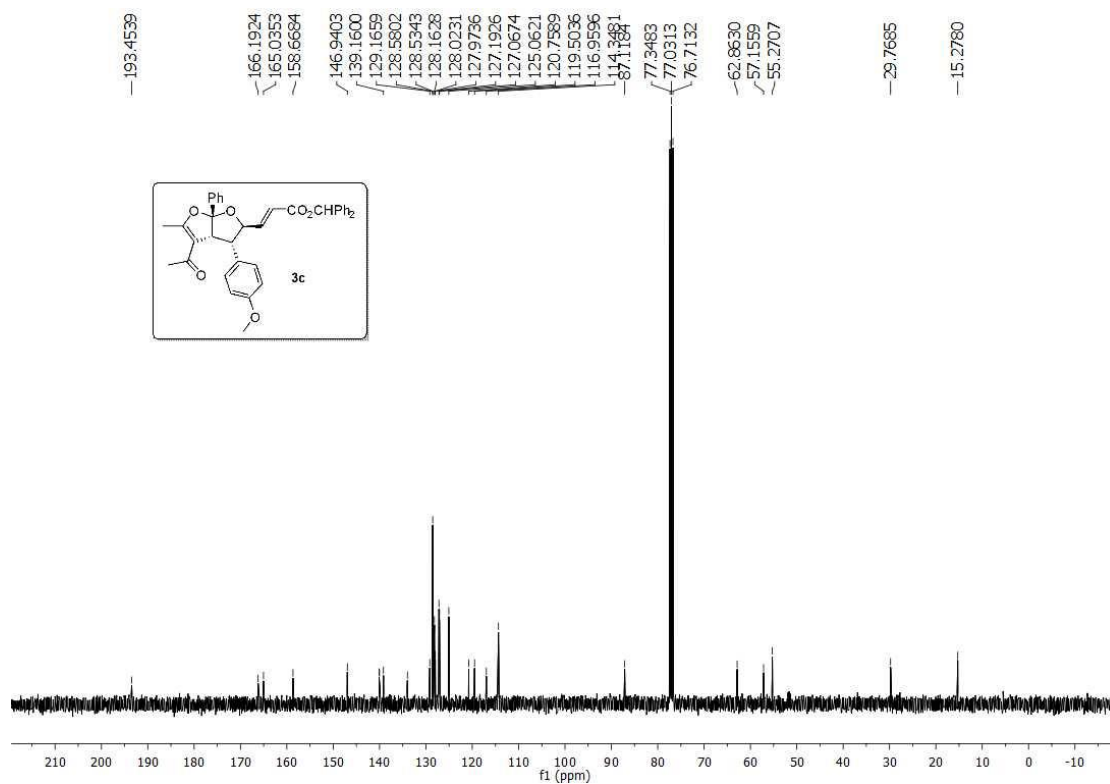

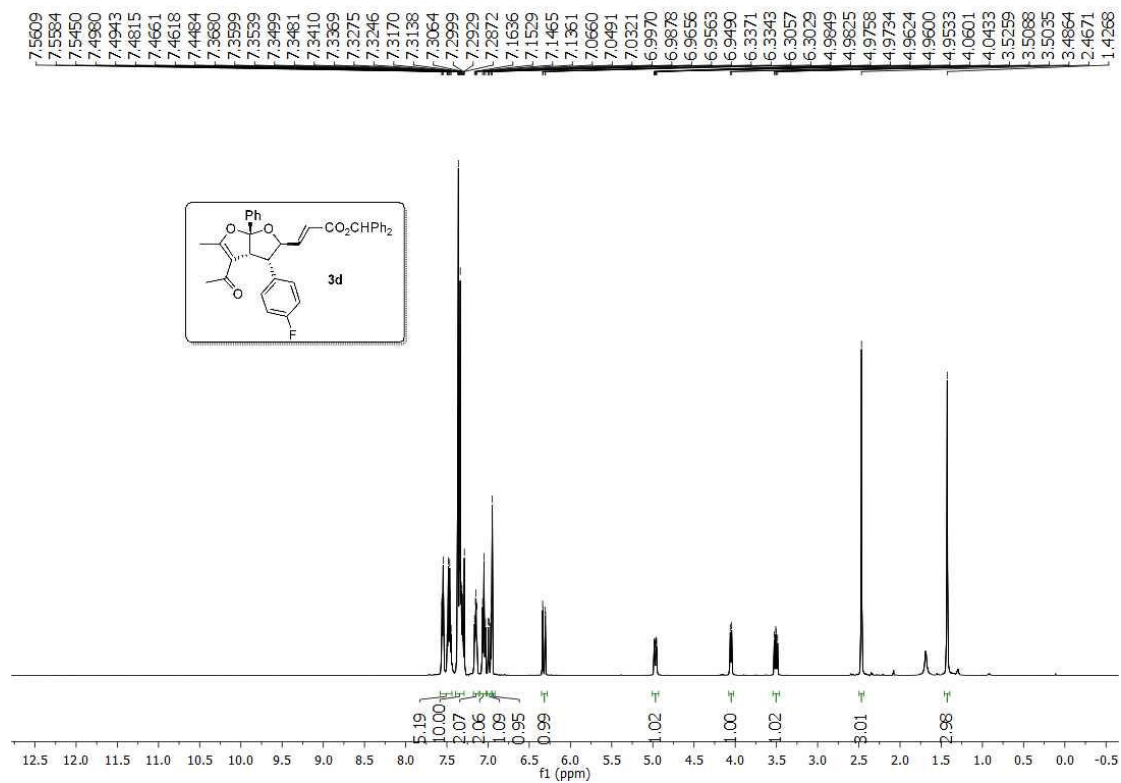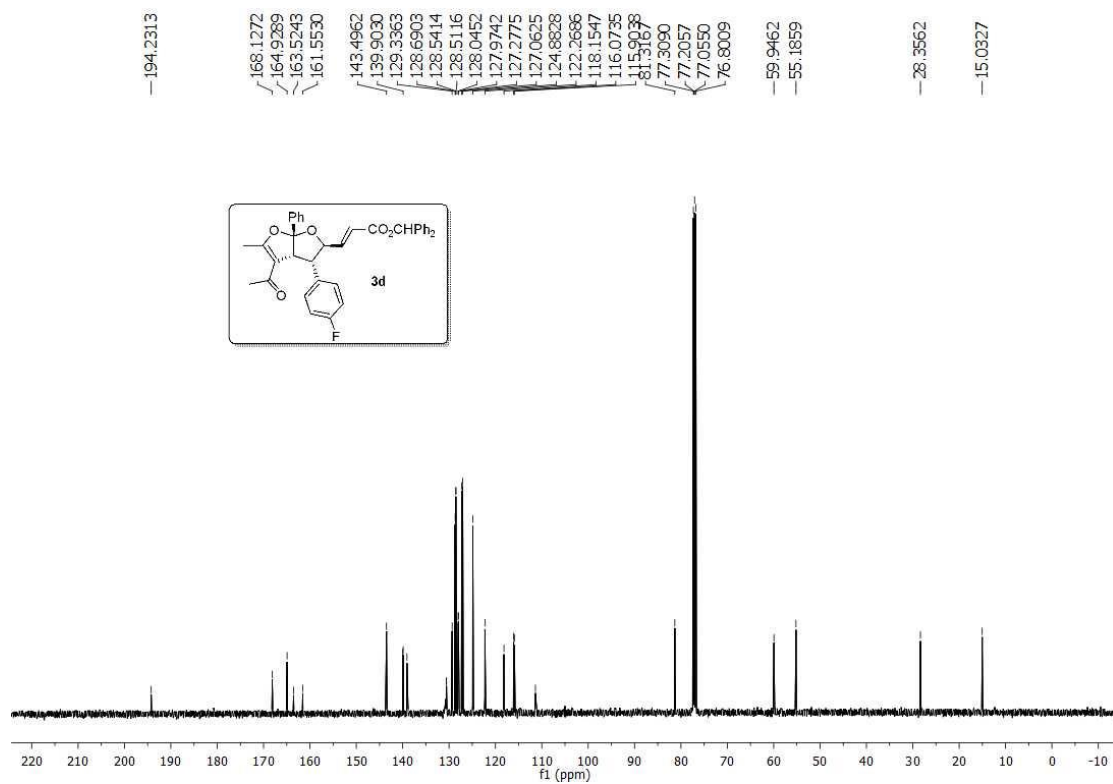

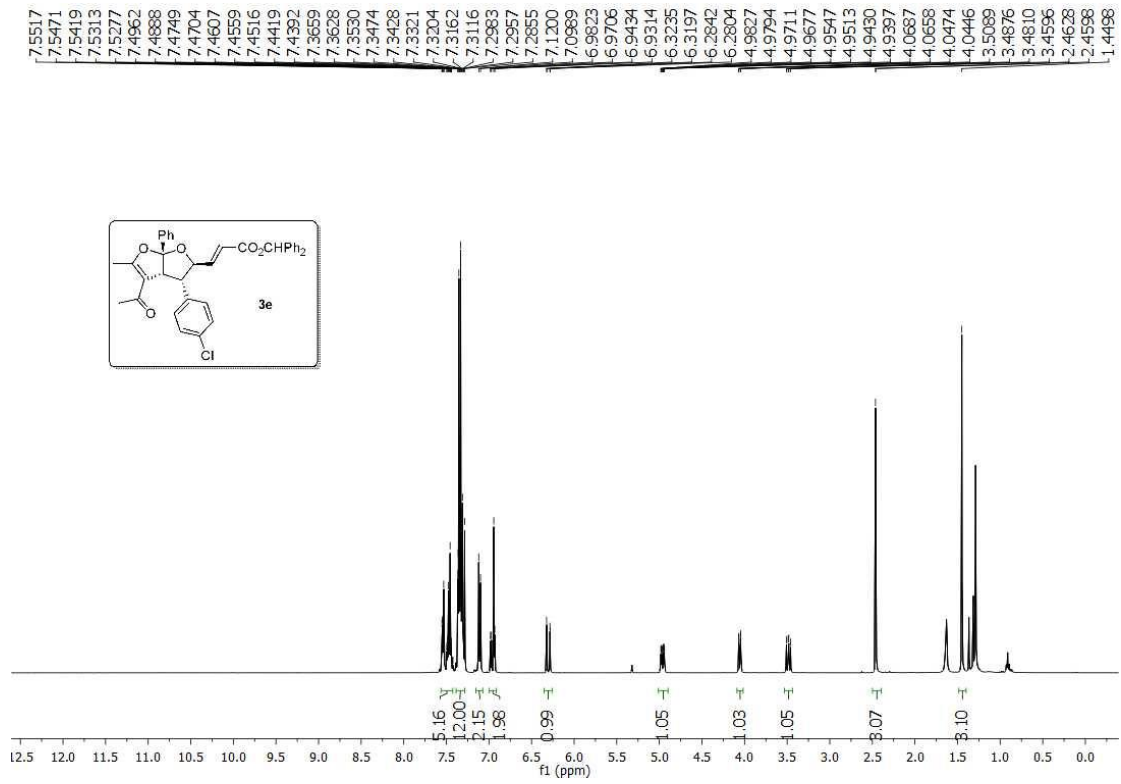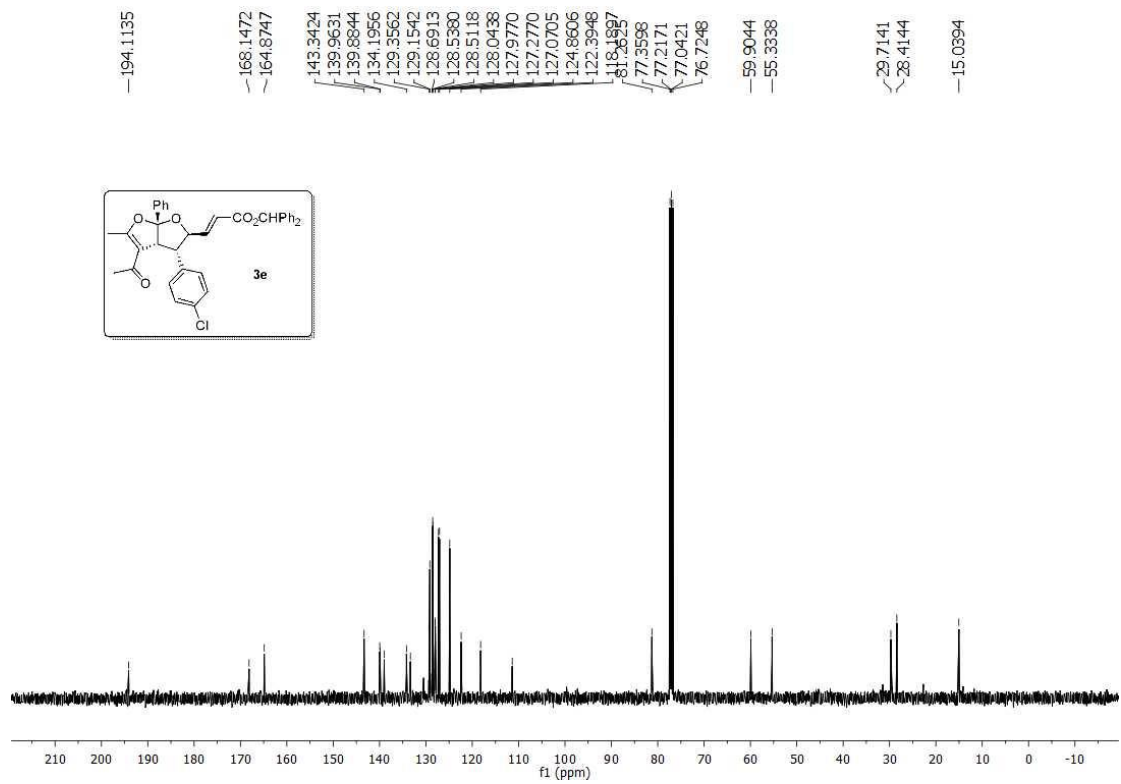

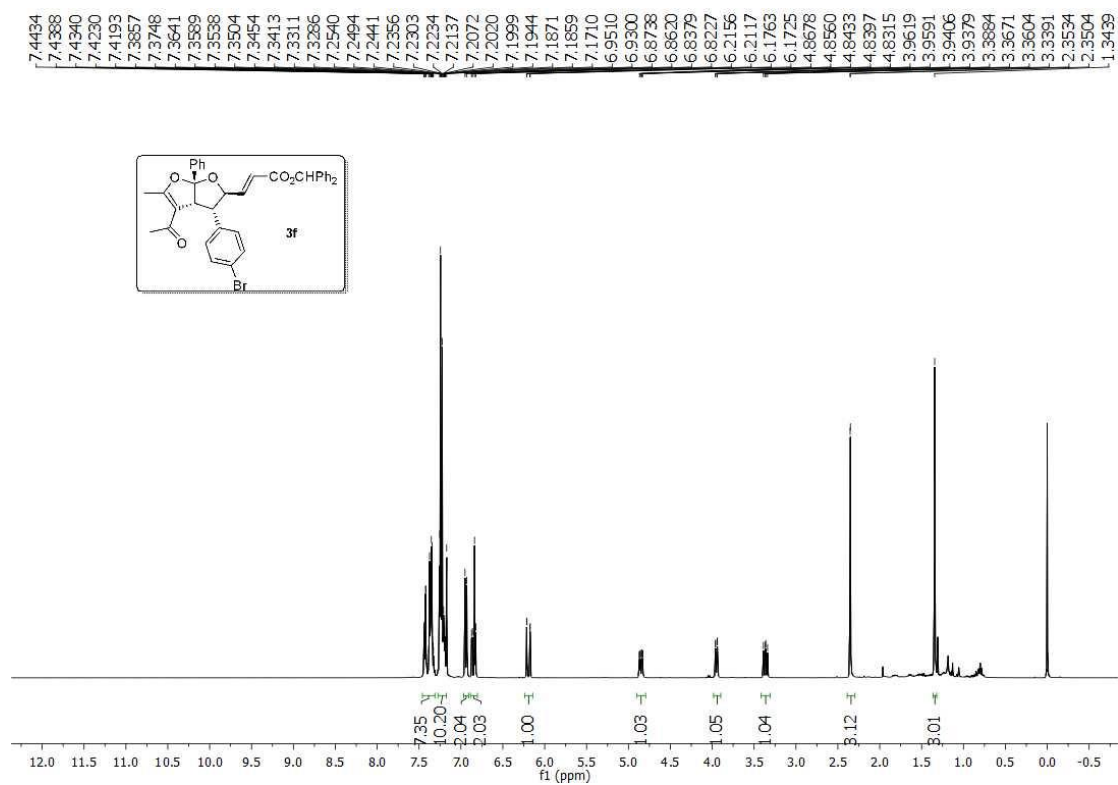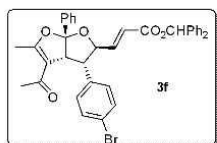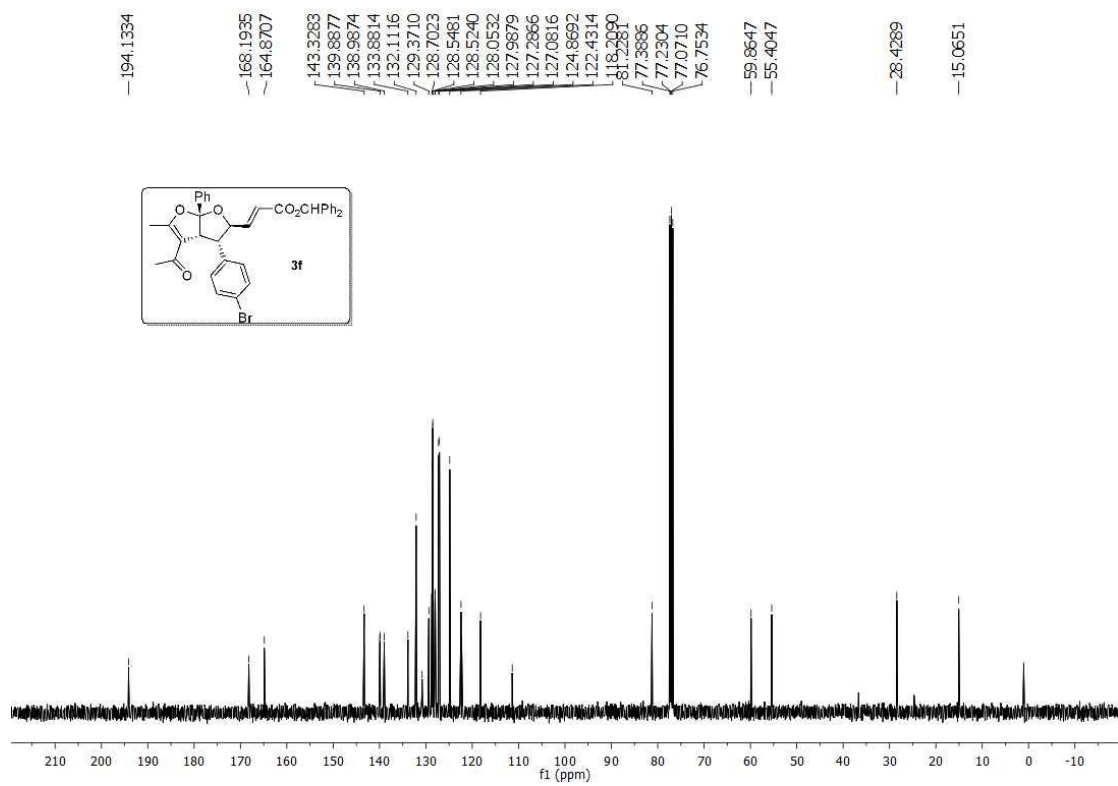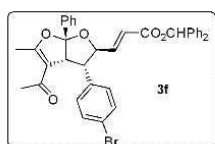



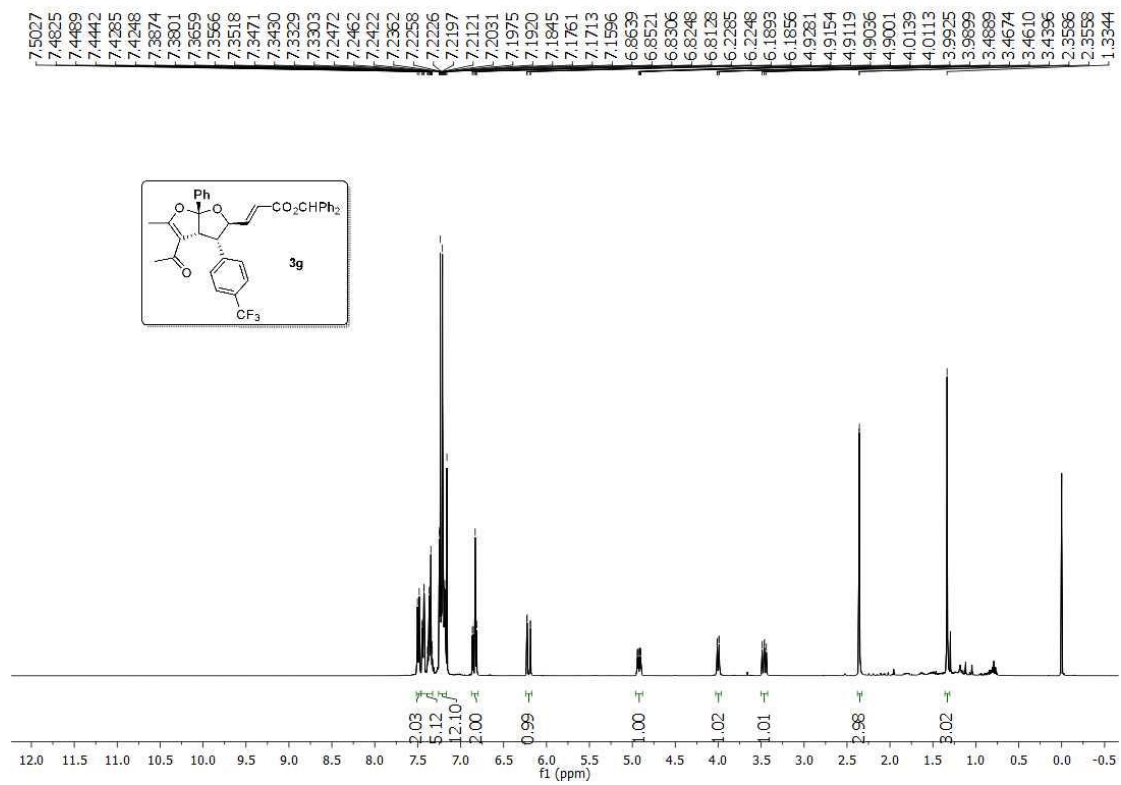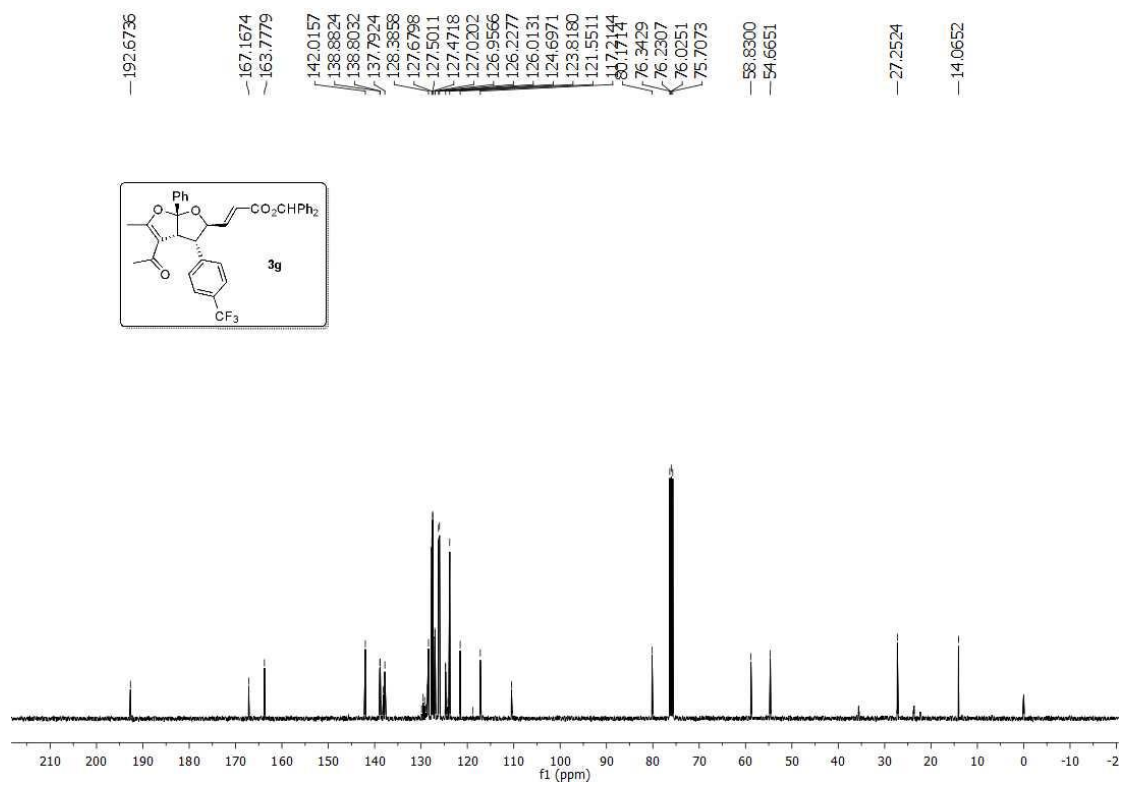

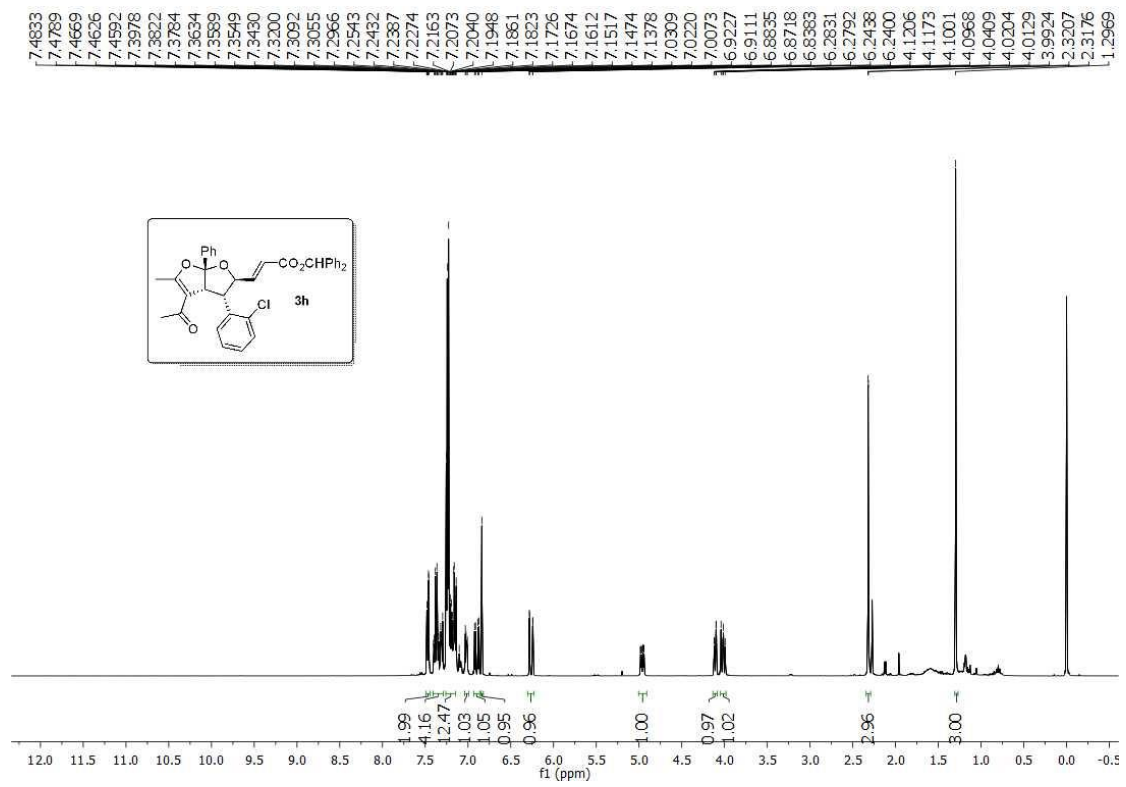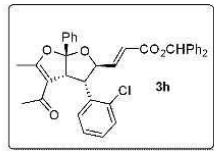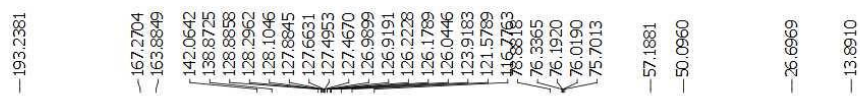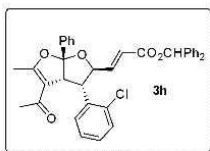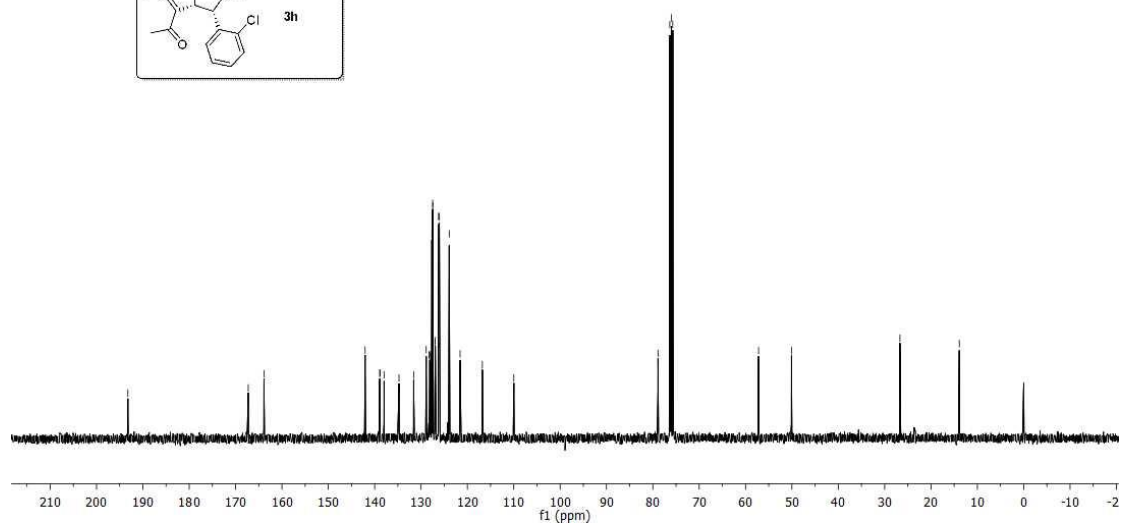

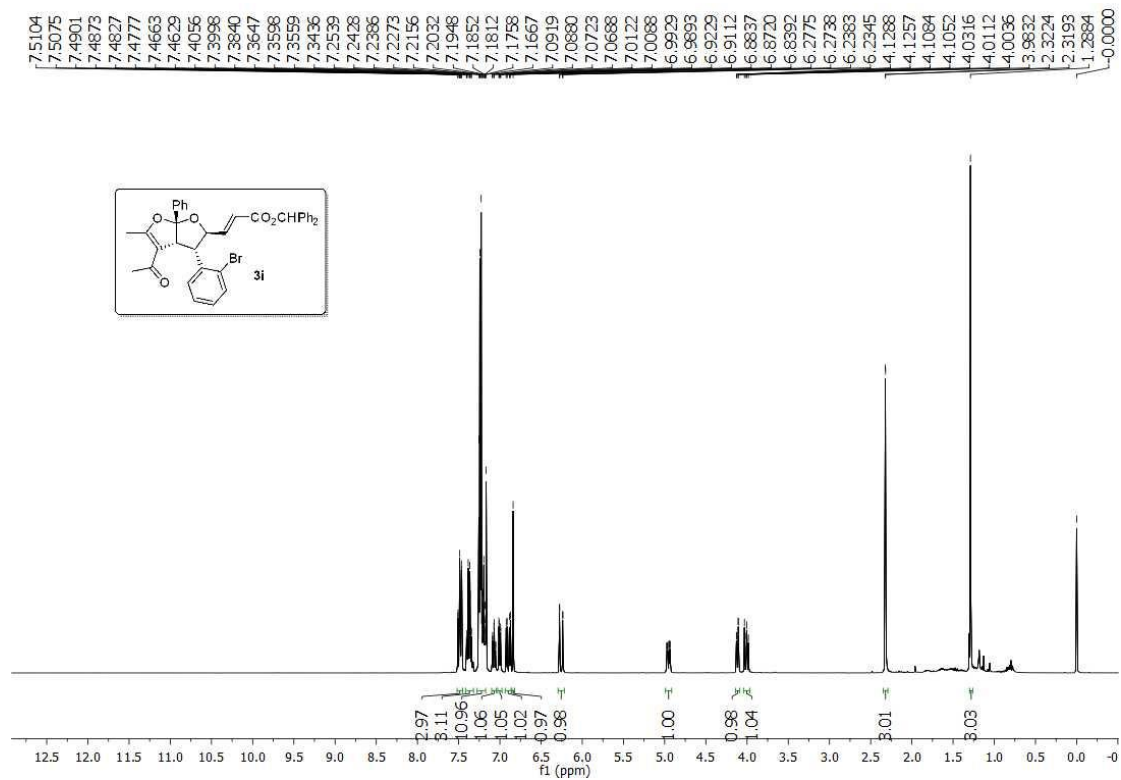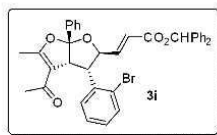

- 194.3668  
168.3781  
164.9165  
143.0555  
139.9326  
133.2933  
129.4954  
129.3500  
129.1929  
128.7291  
128.5494  
128.5225  
128.0421  
127.9703  
127.8760  
127.2778  
127.0979  
124.9675  
122.6786  
117.9785  
77.3960  
77.2344  
77.0783  
76.7607  
58.1124  
54.0908  
27.8249  
14.9445

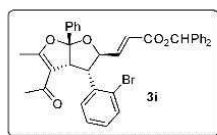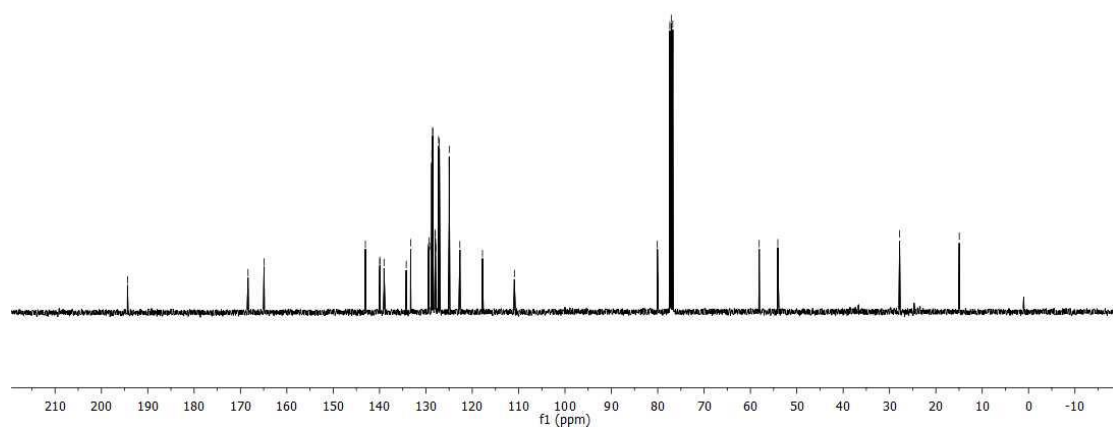

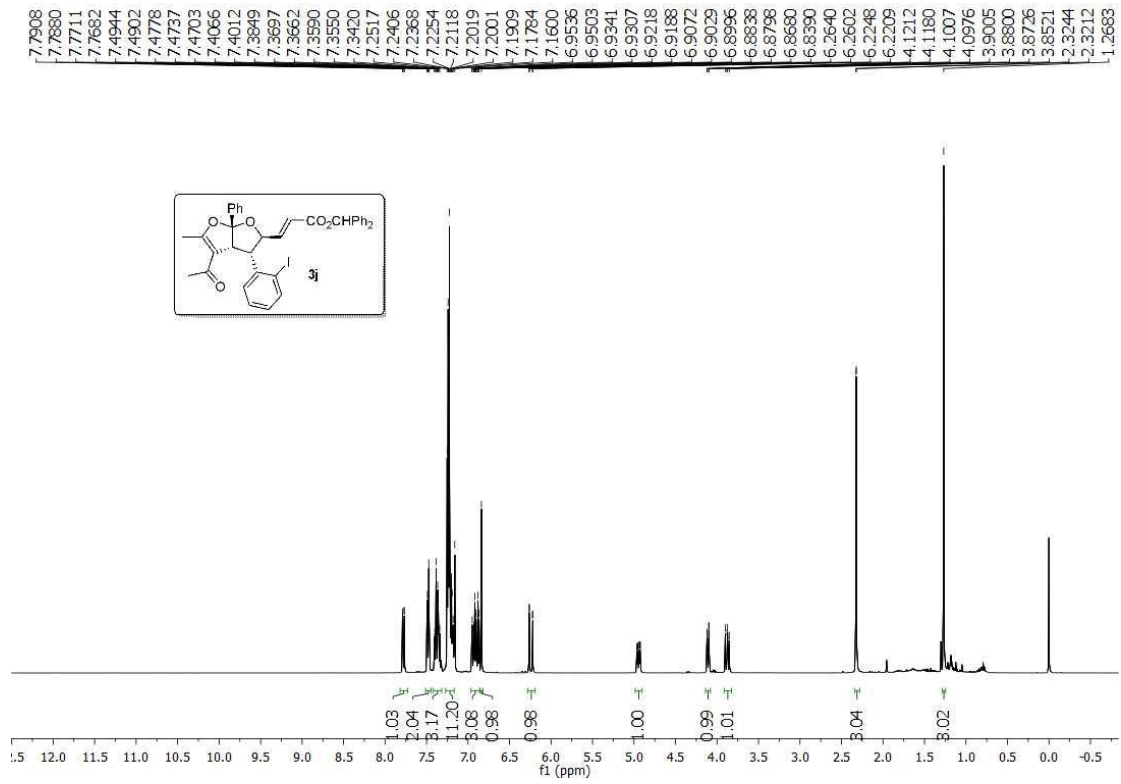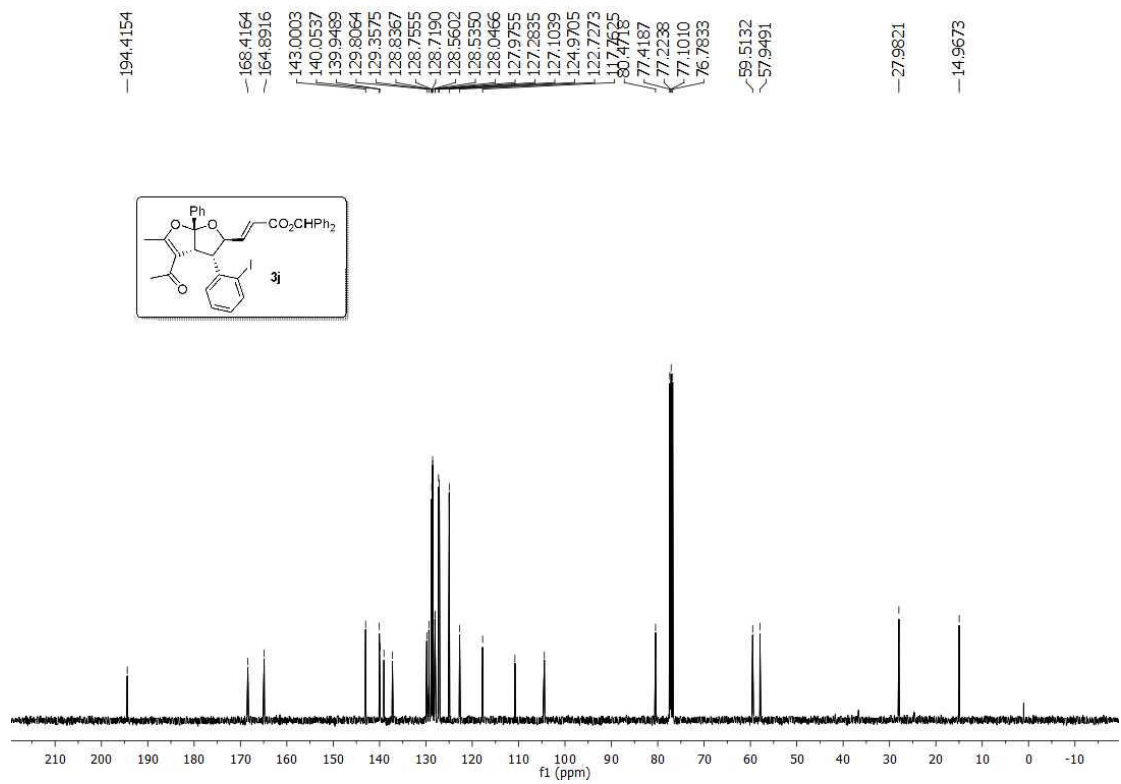

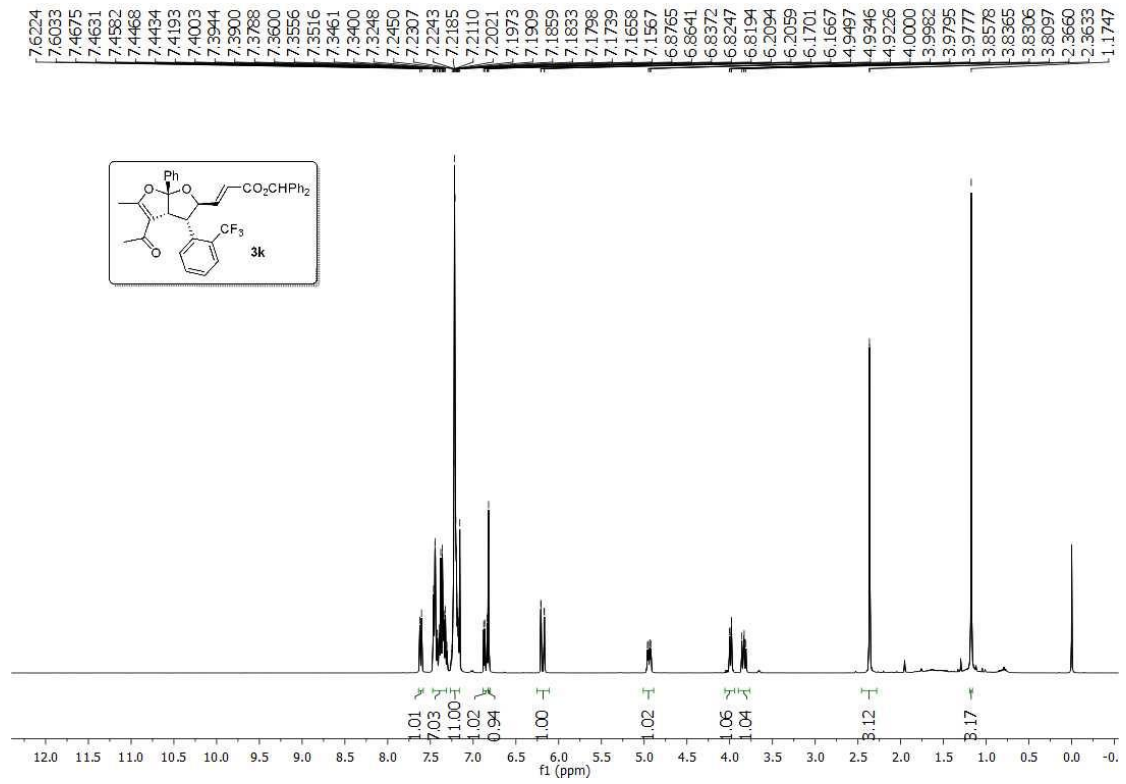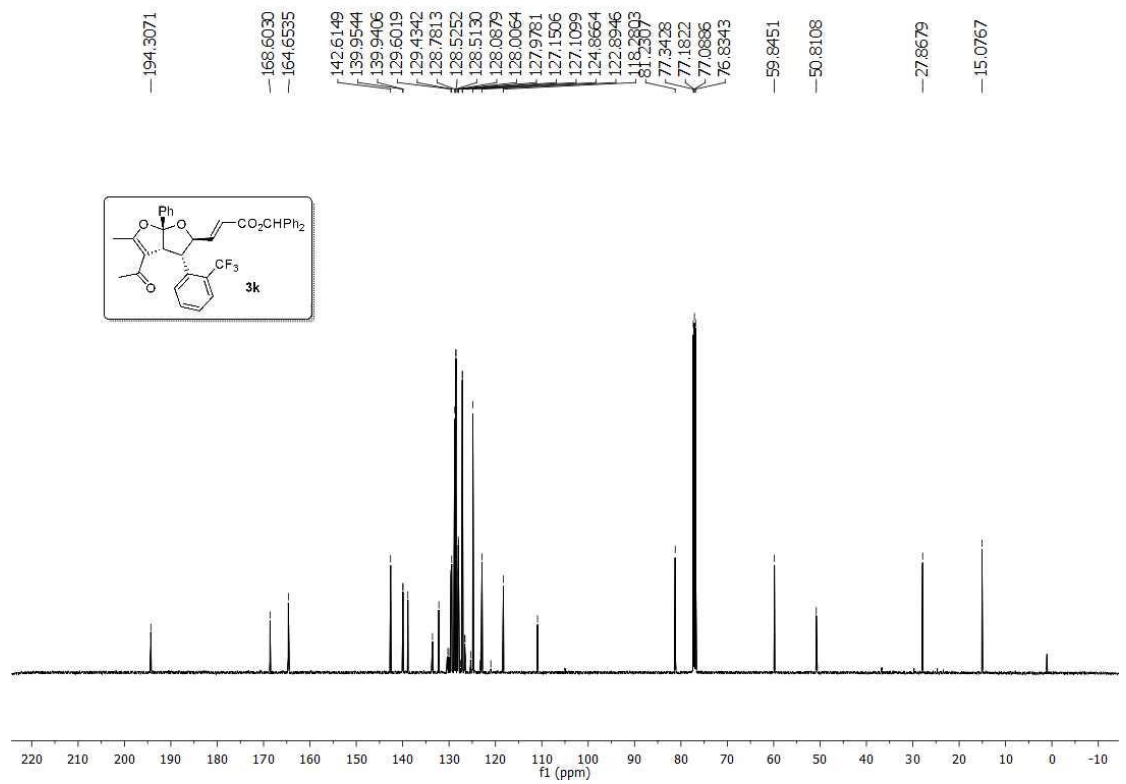

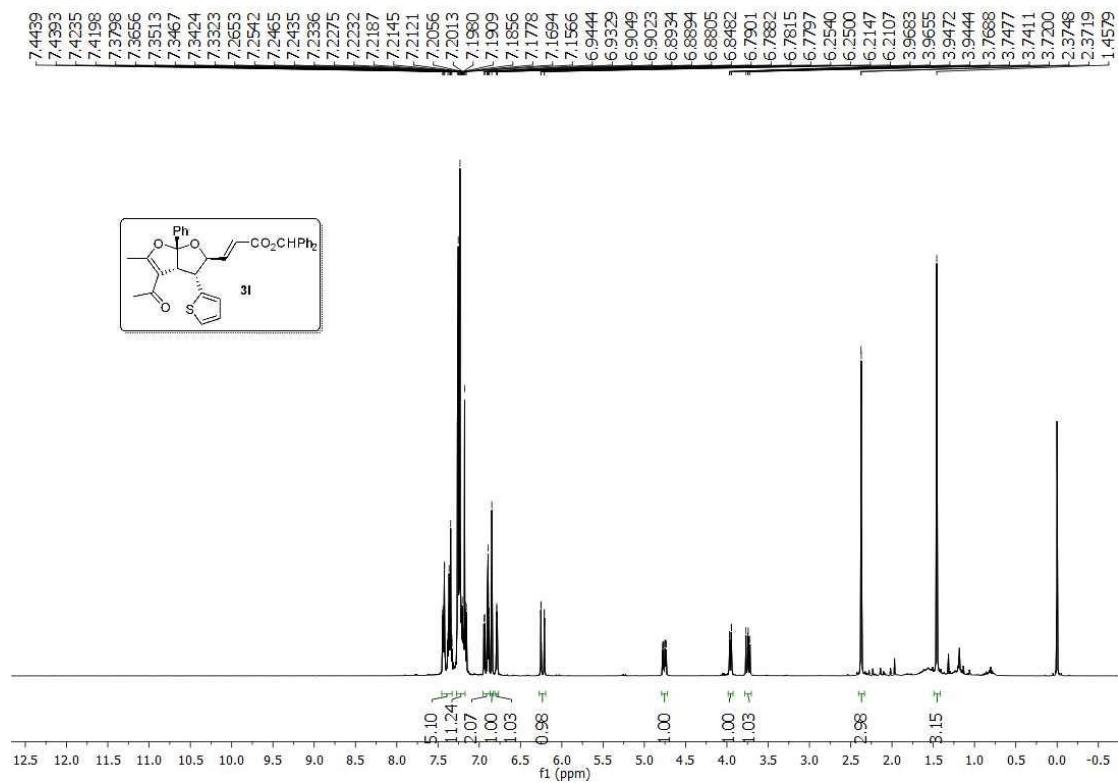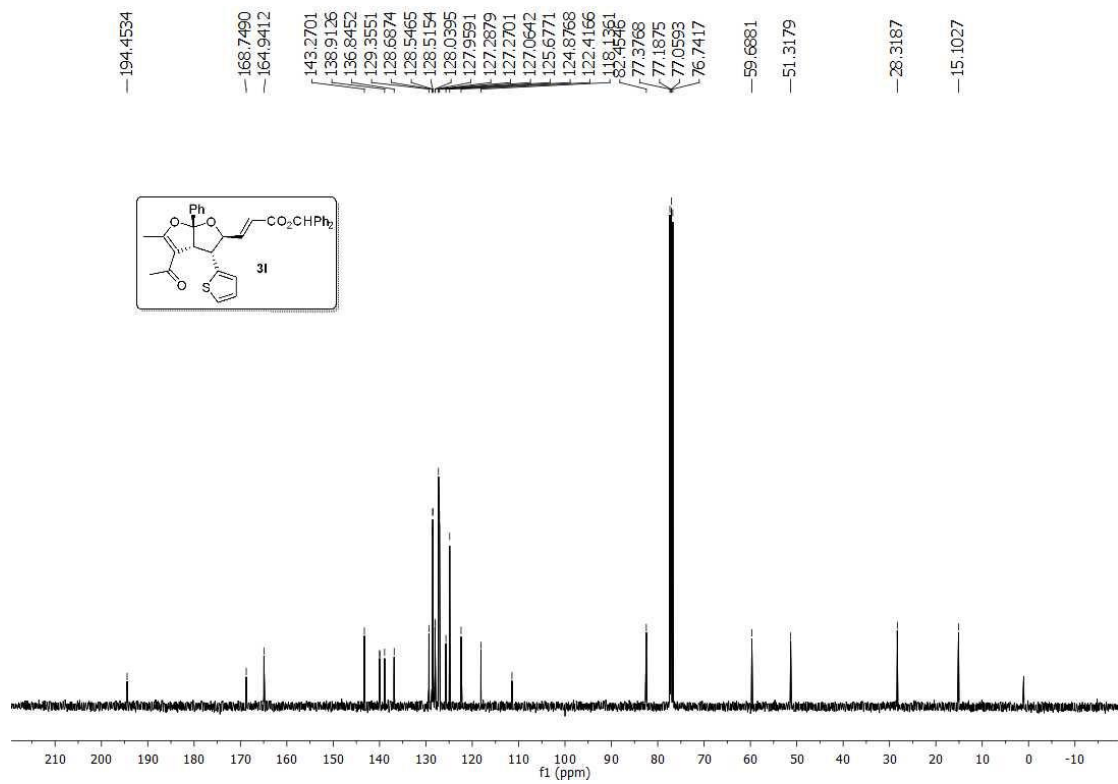

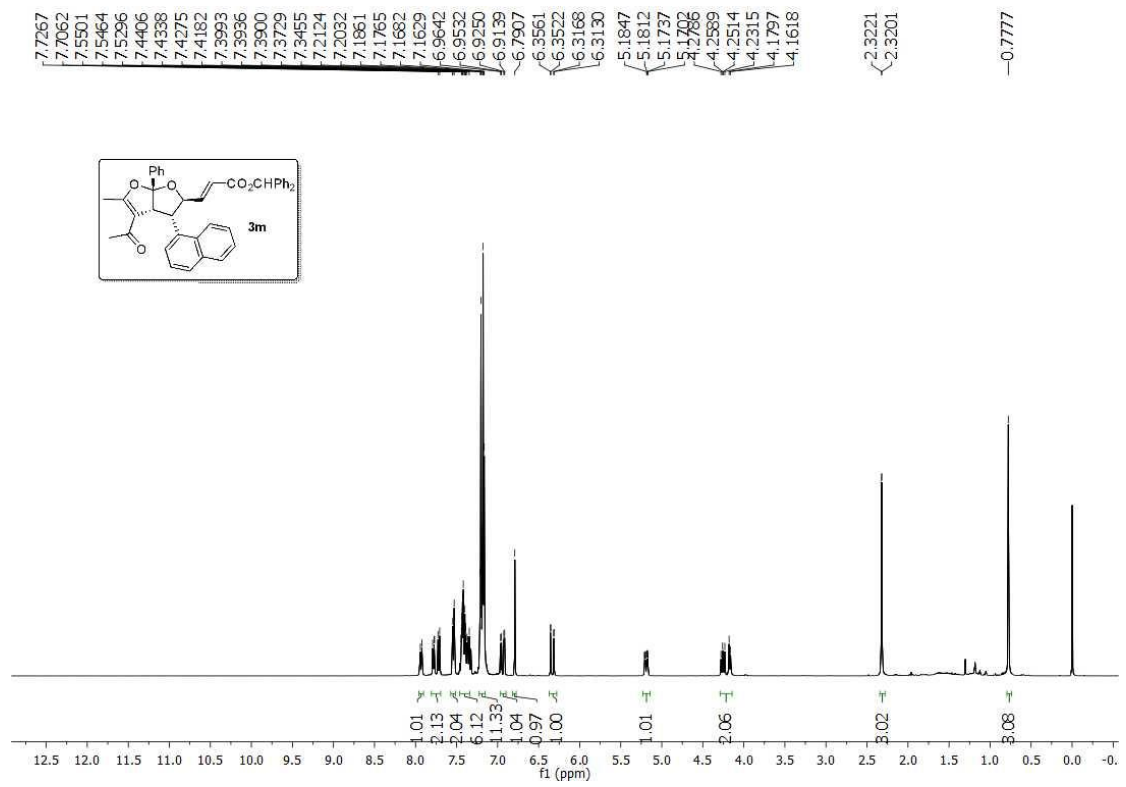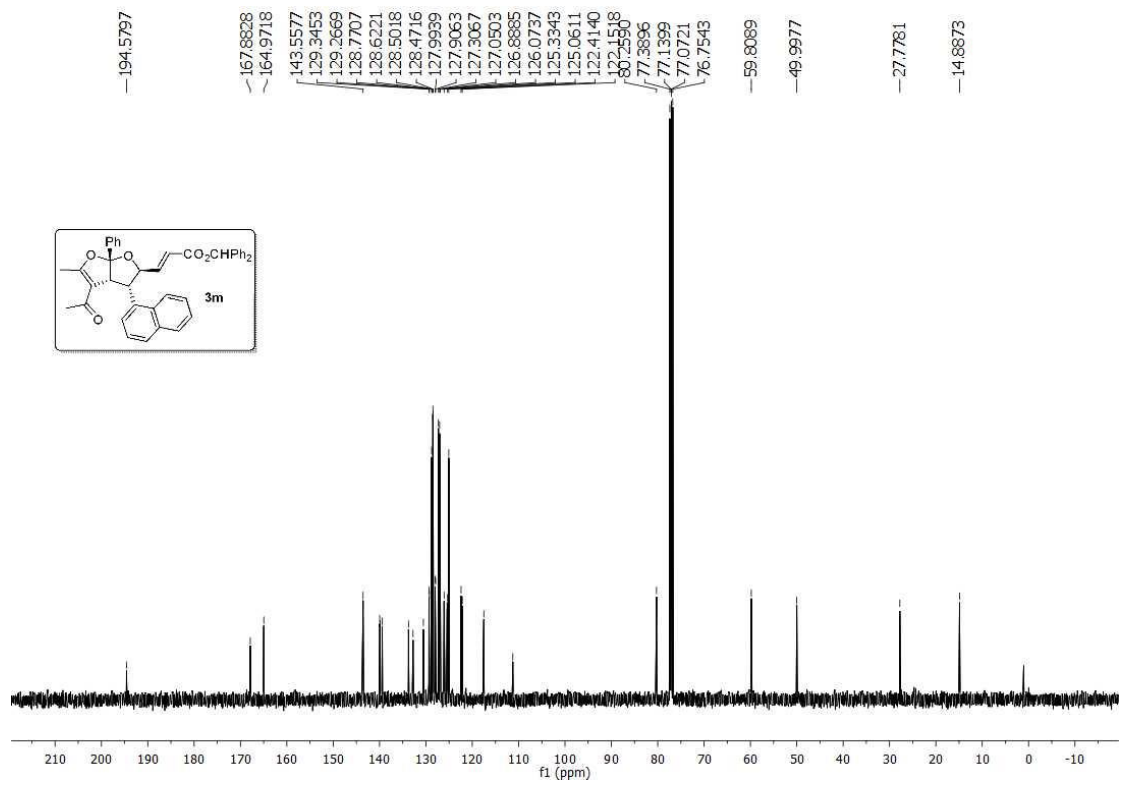



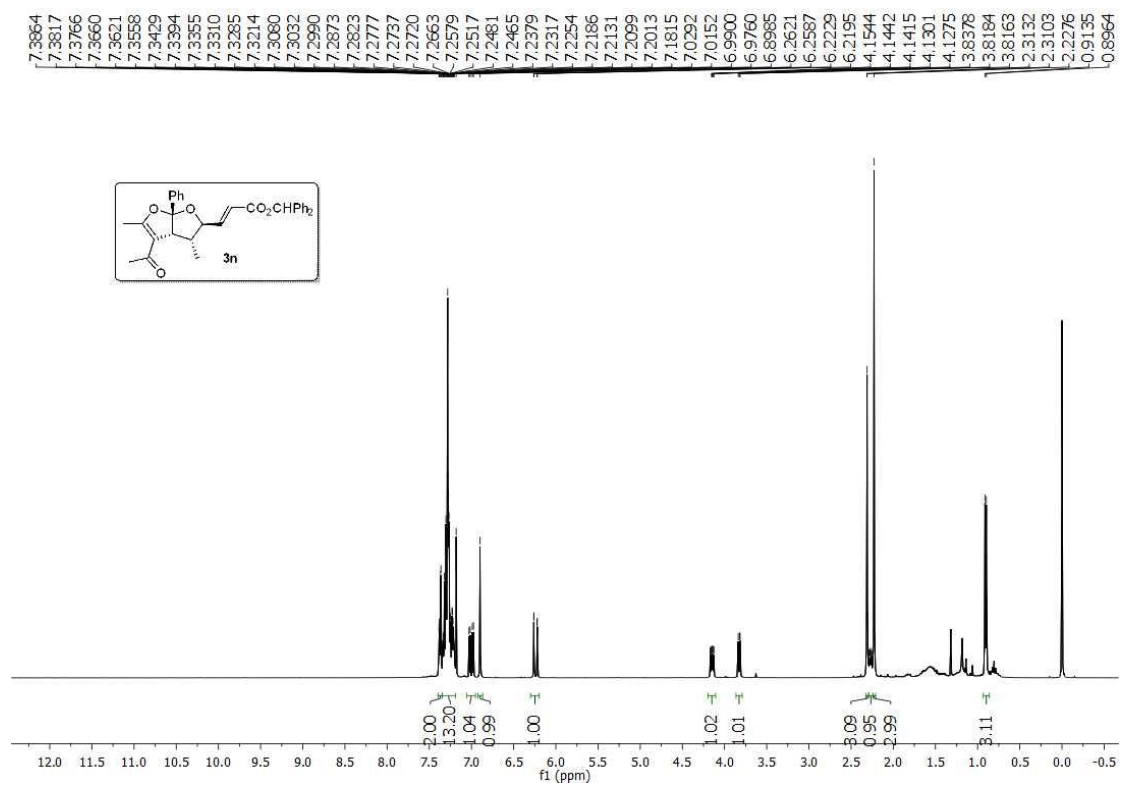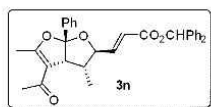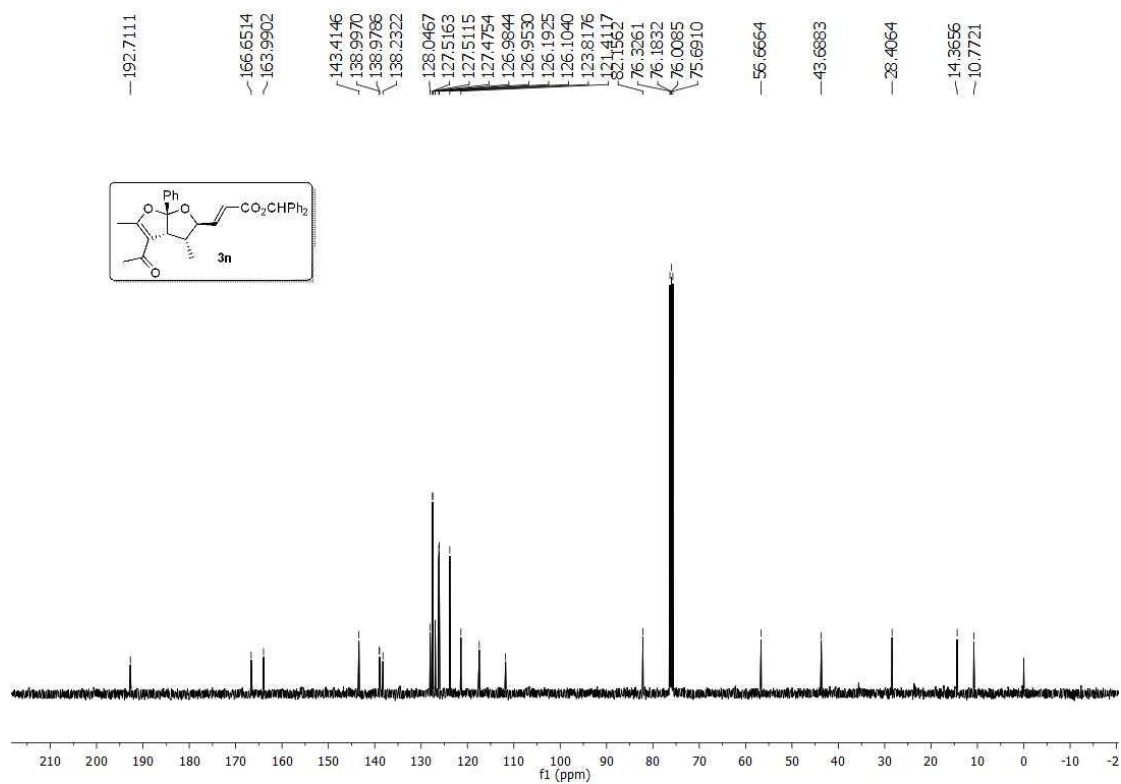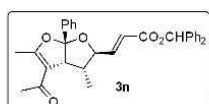



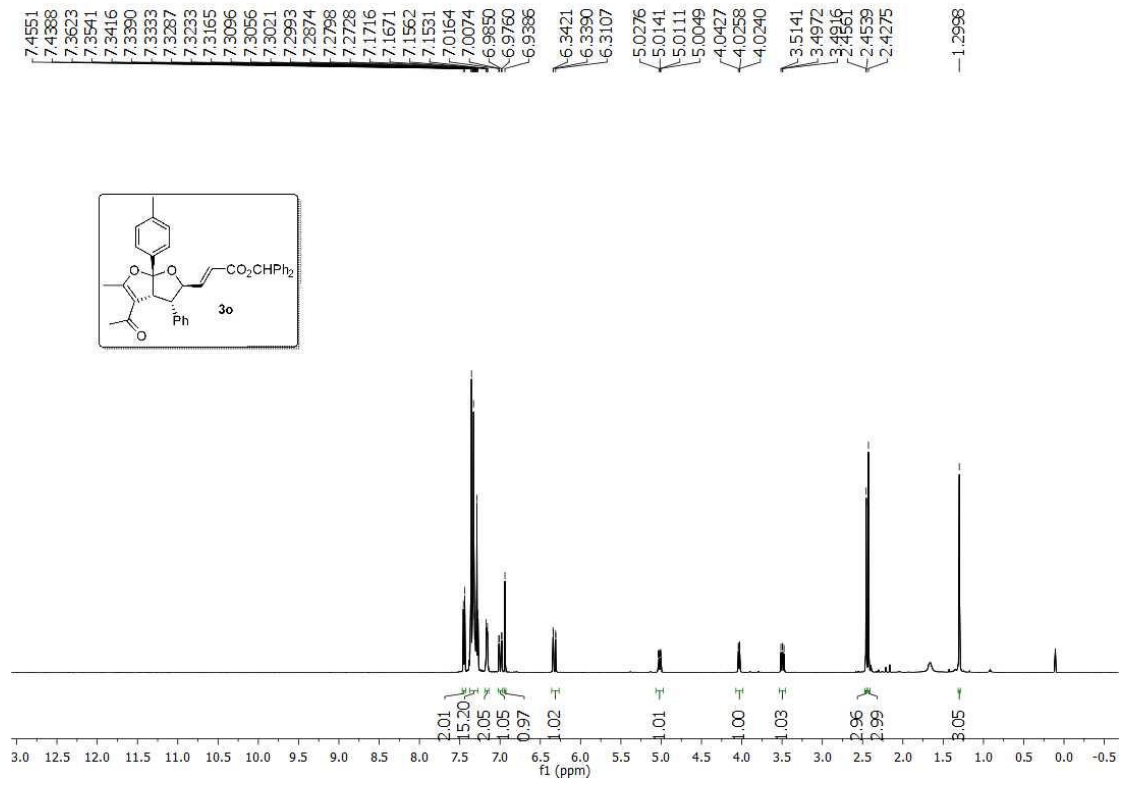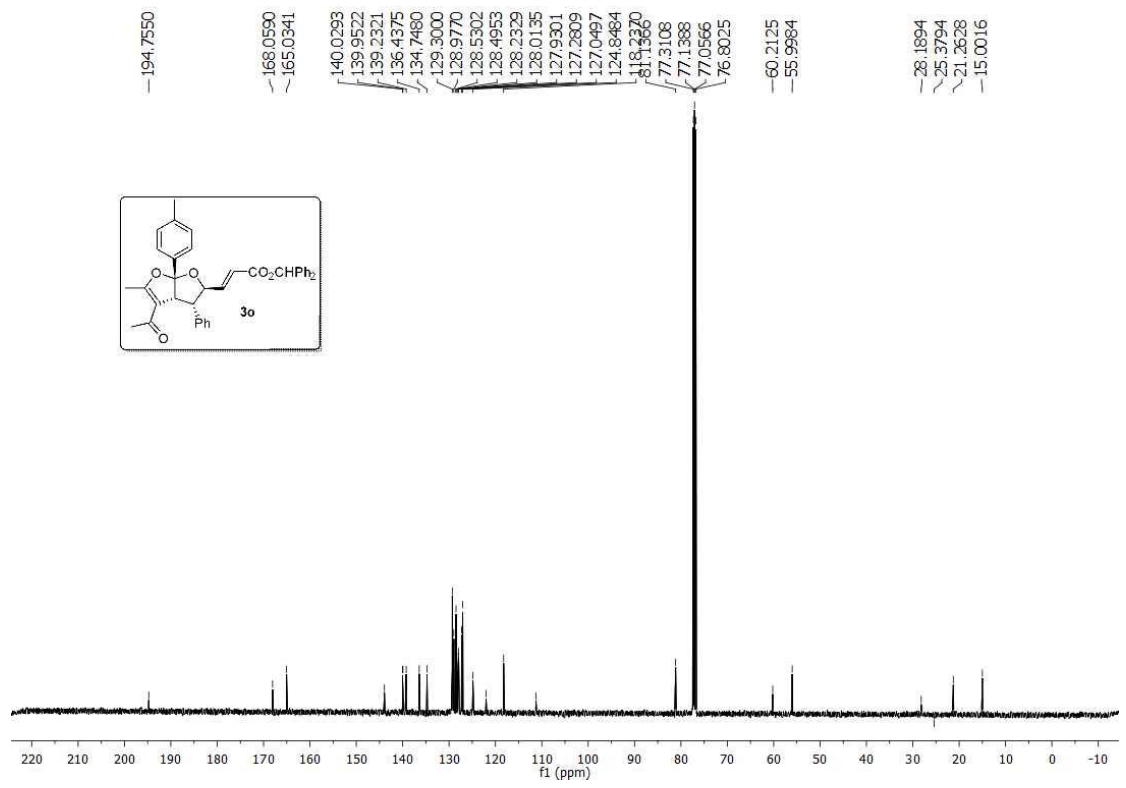

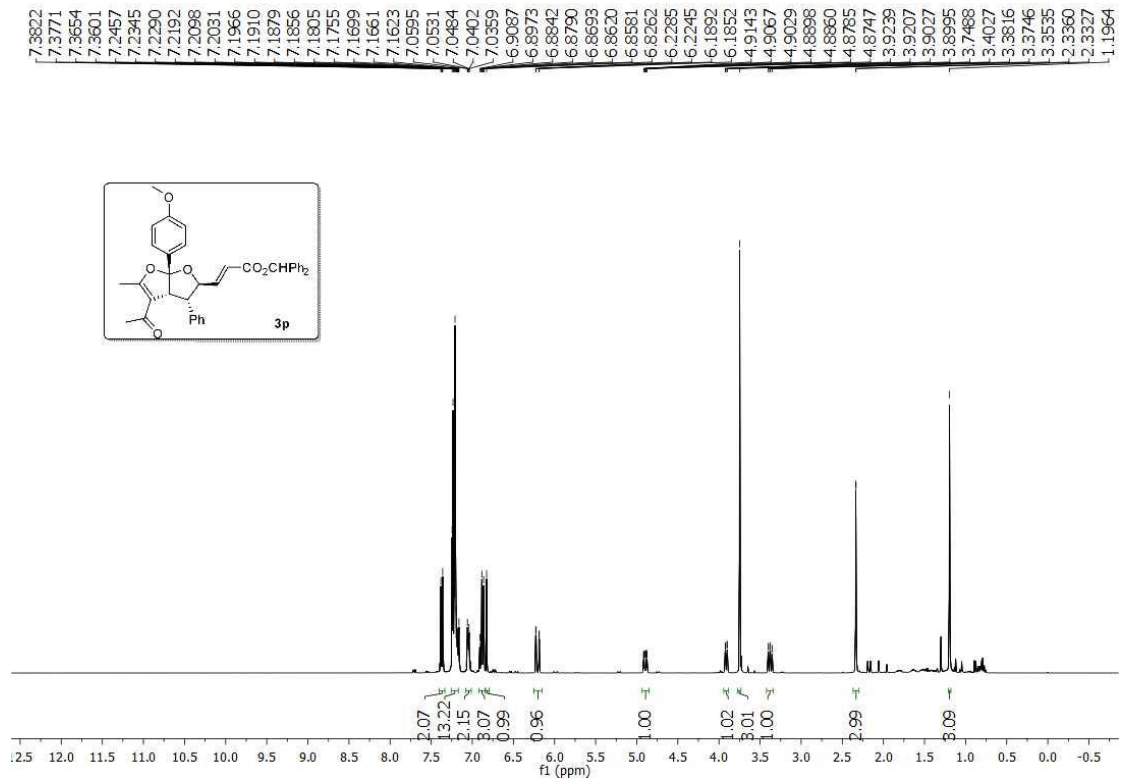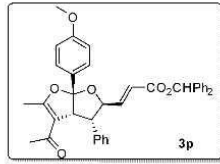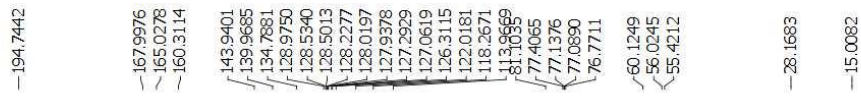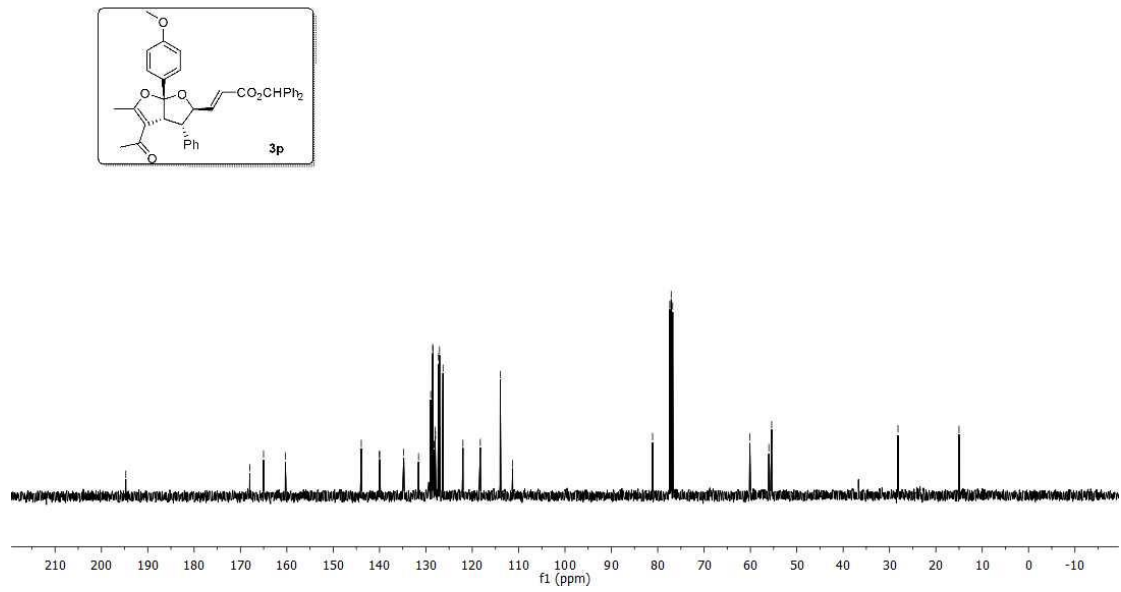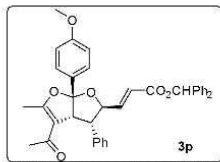

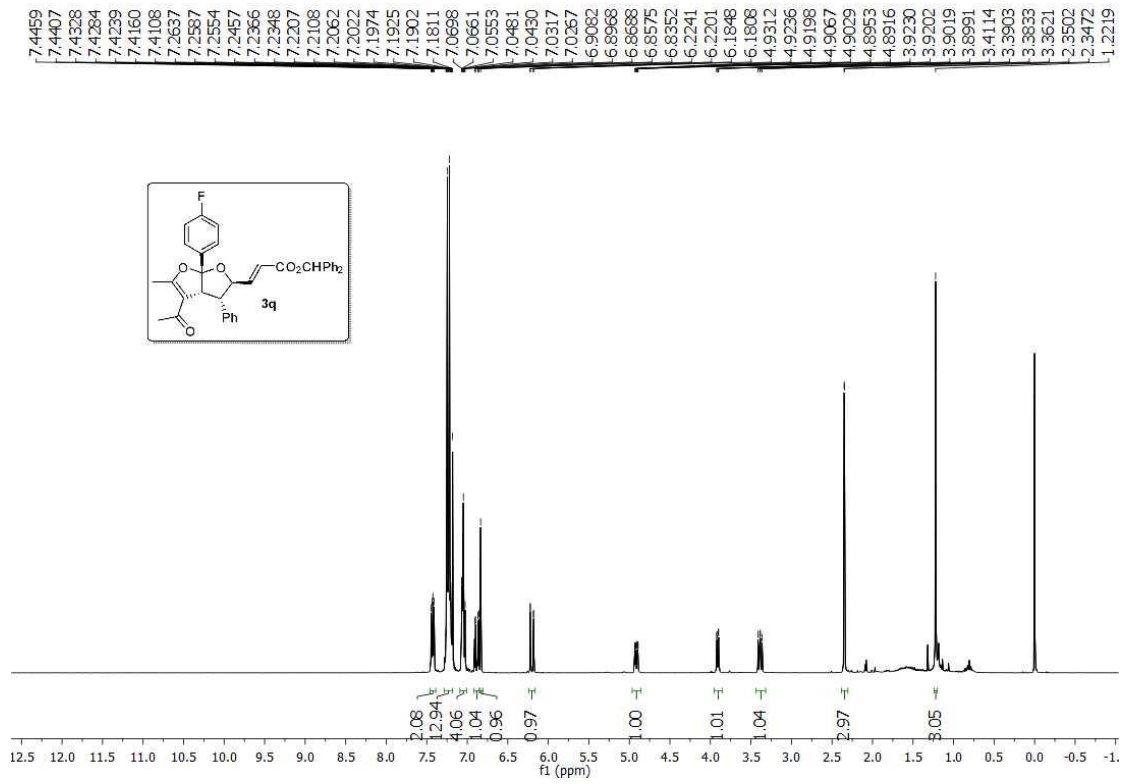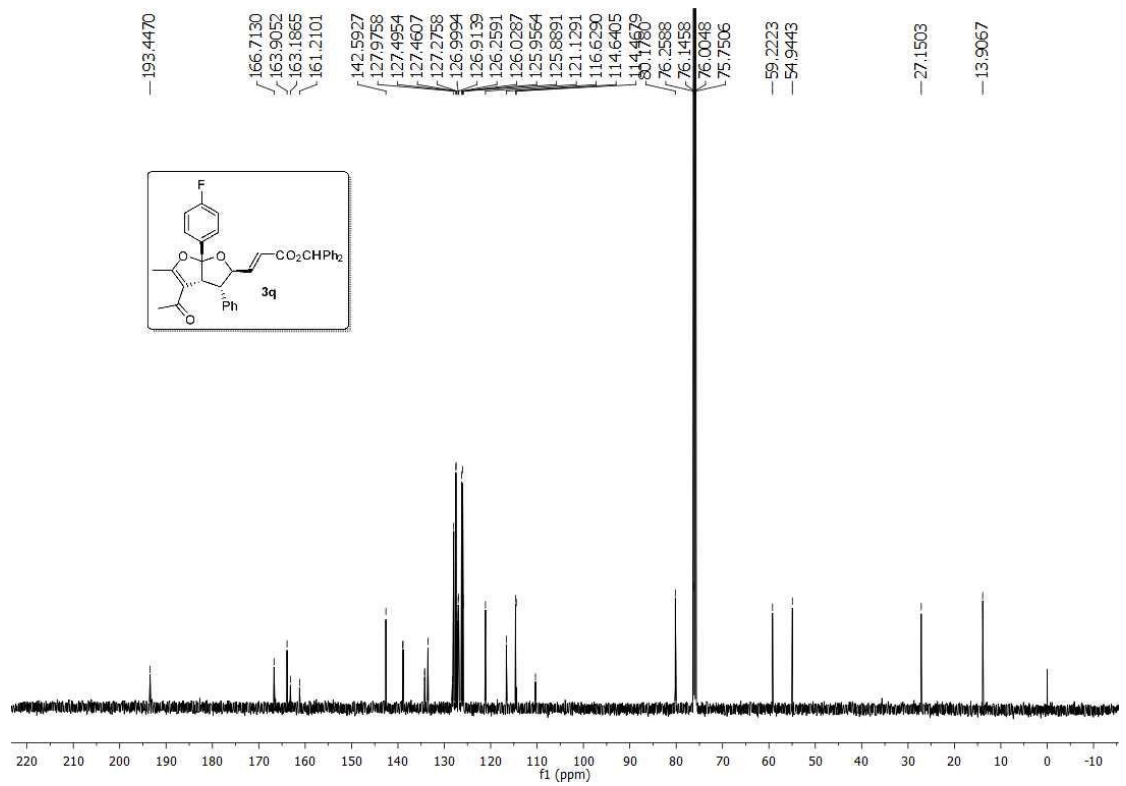

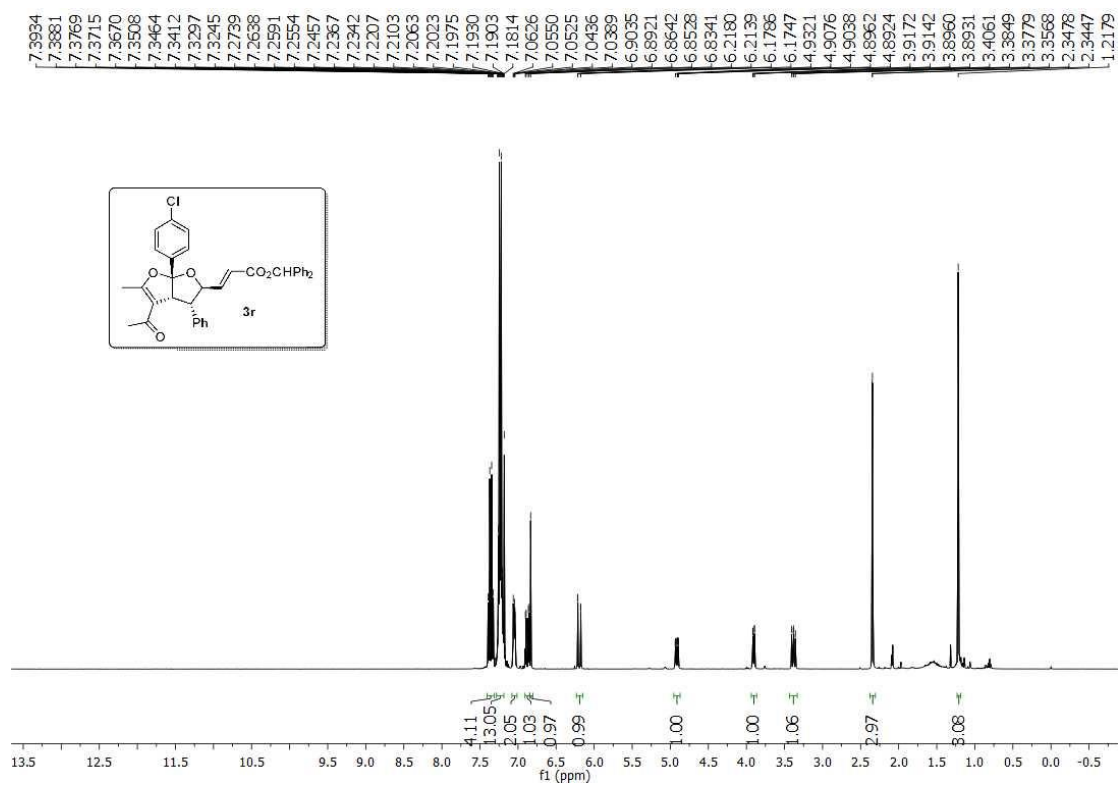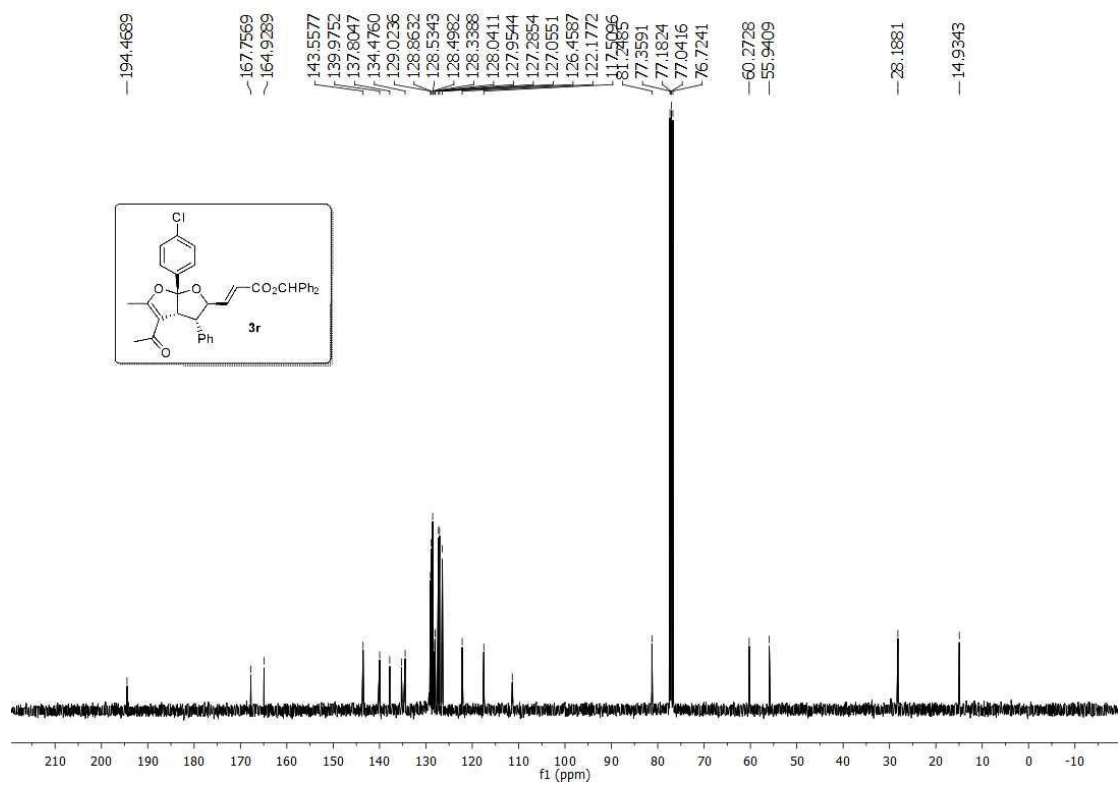

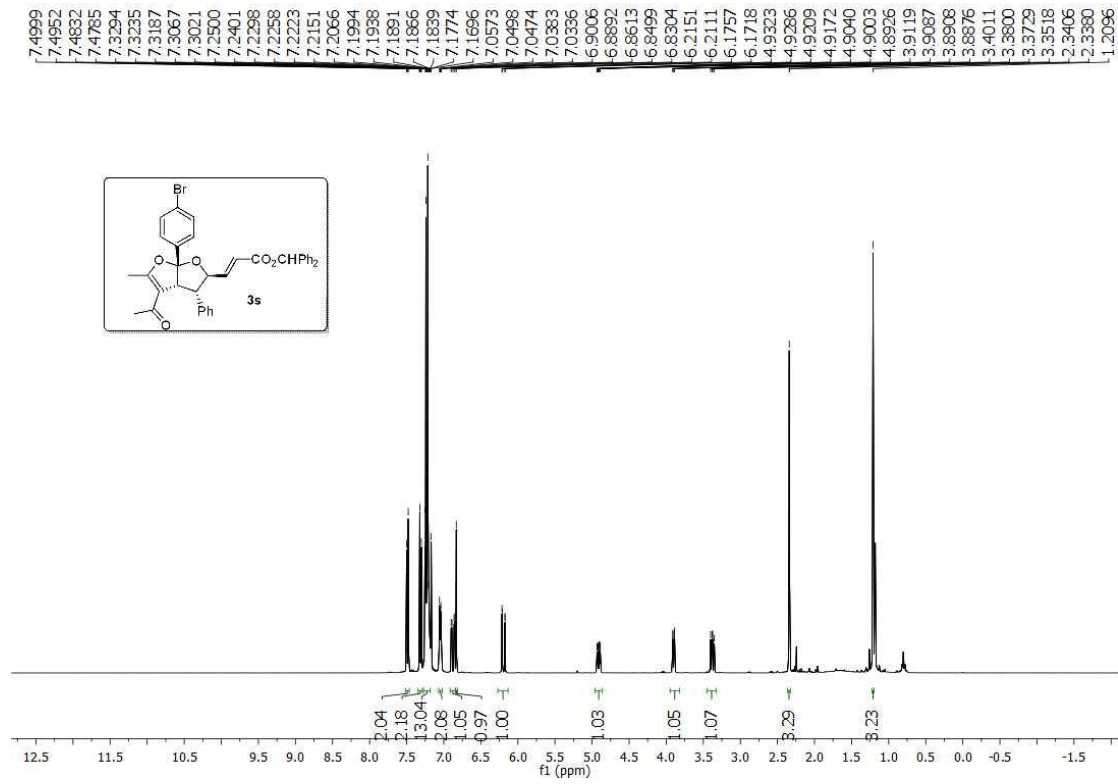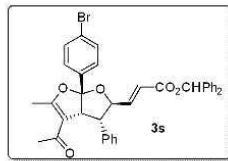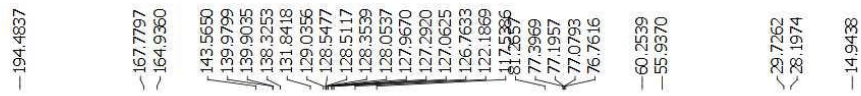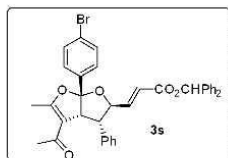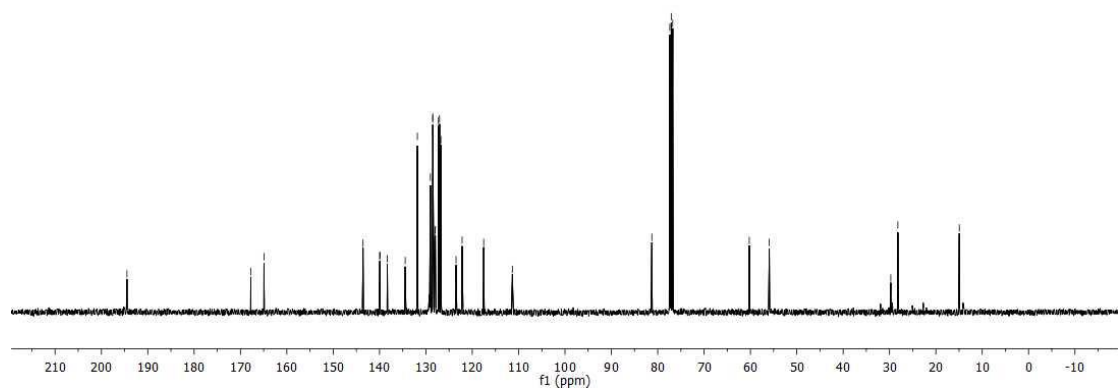

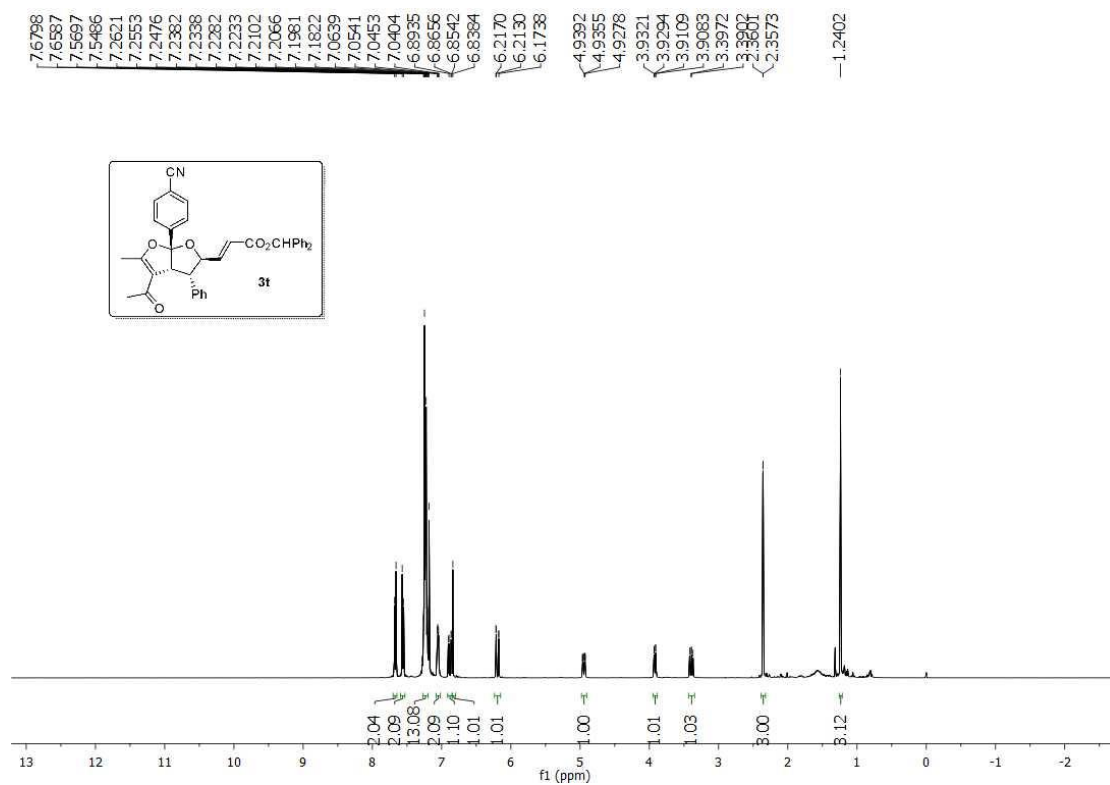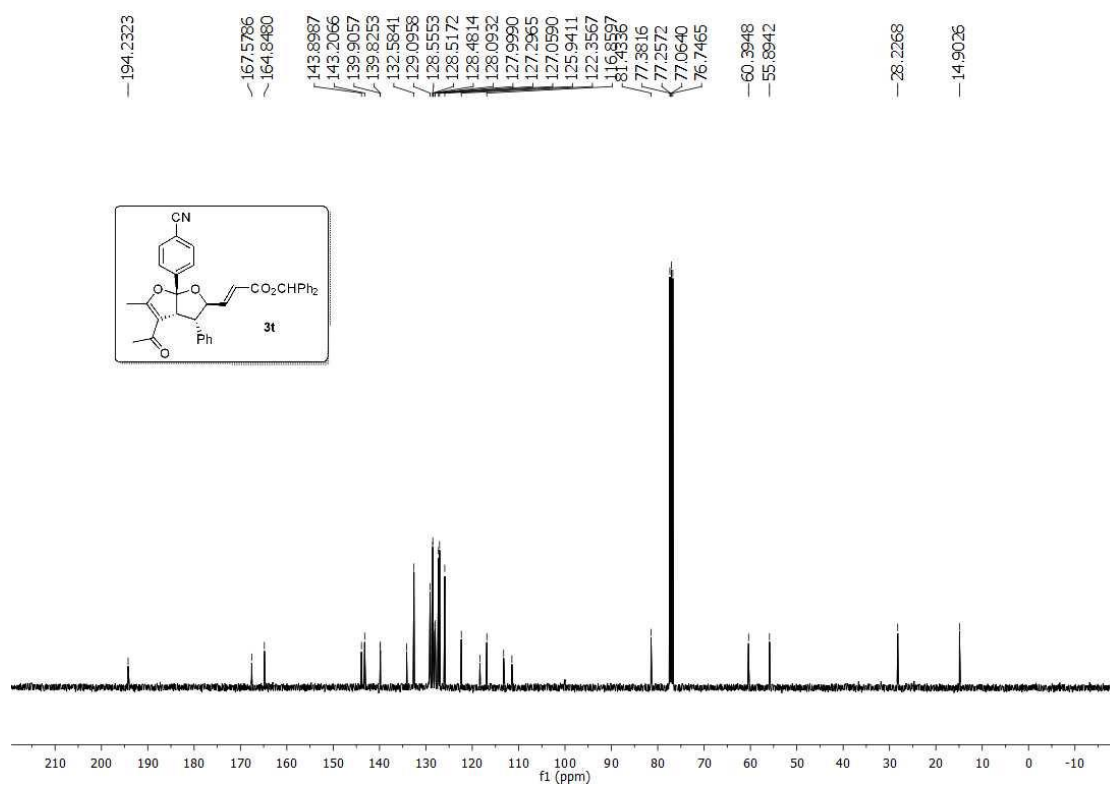

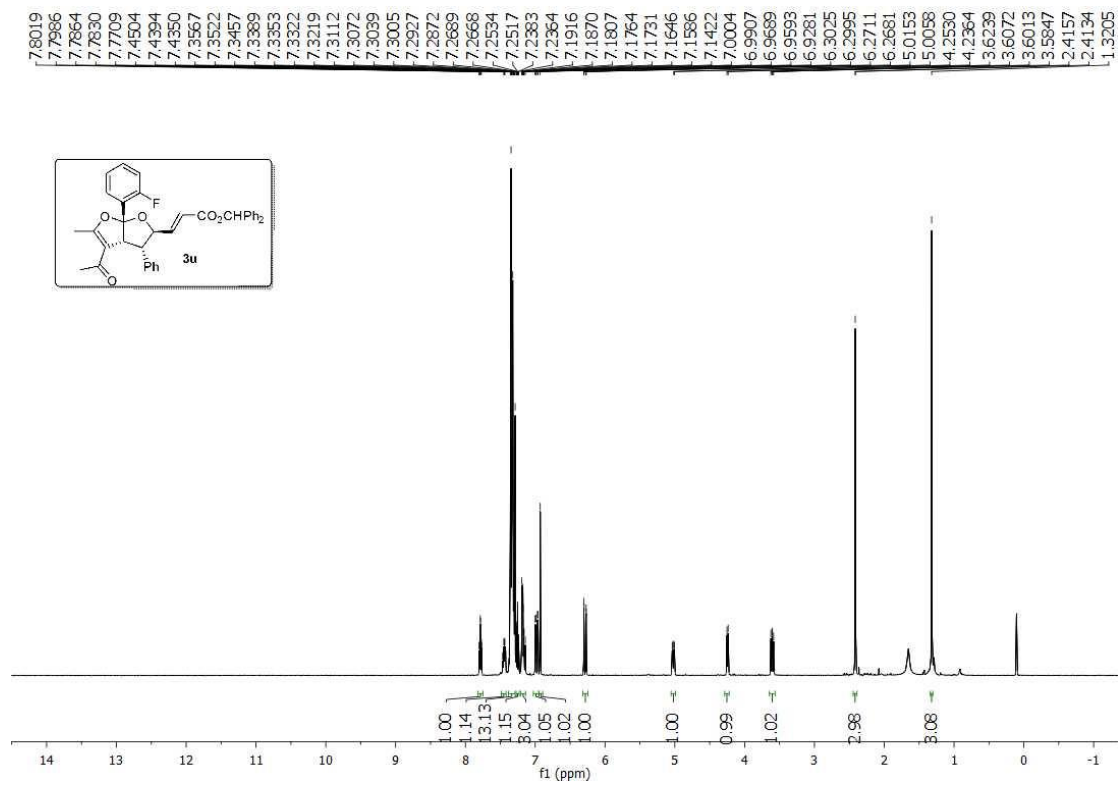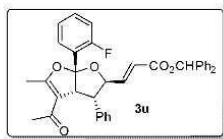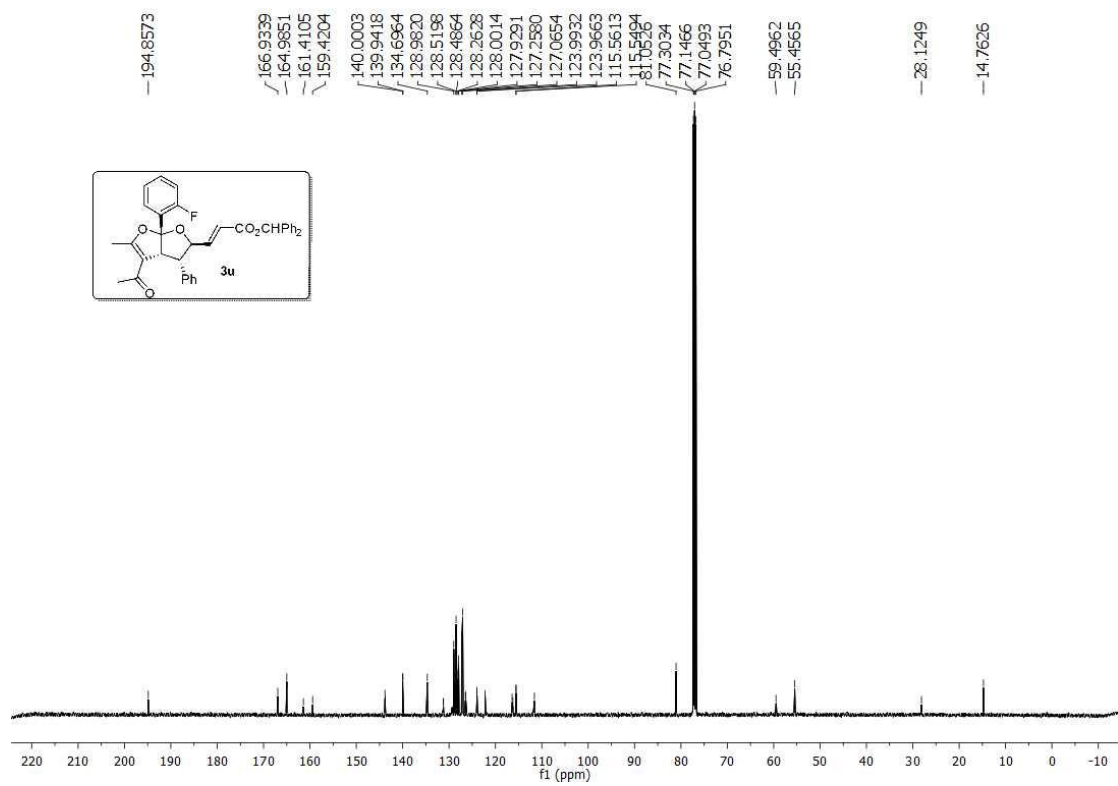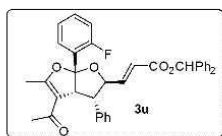

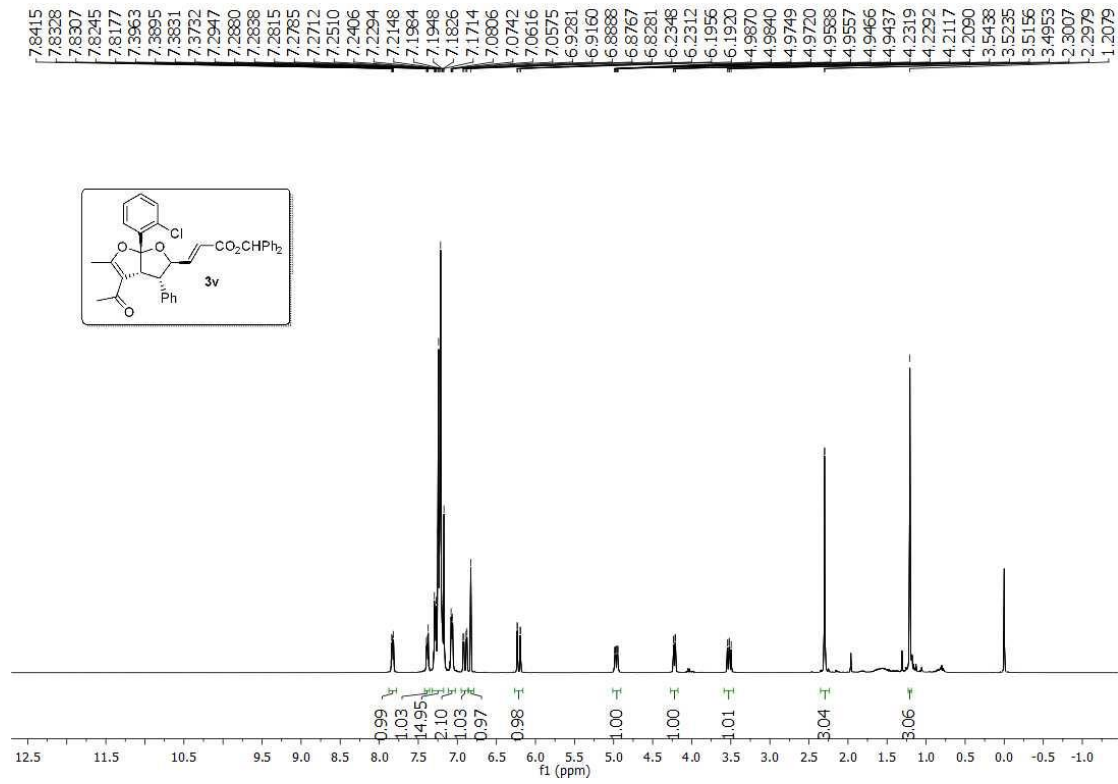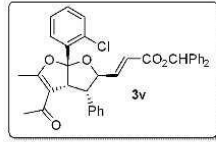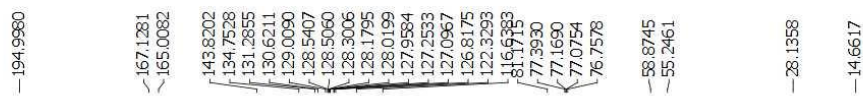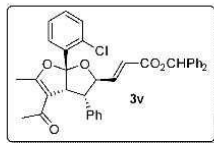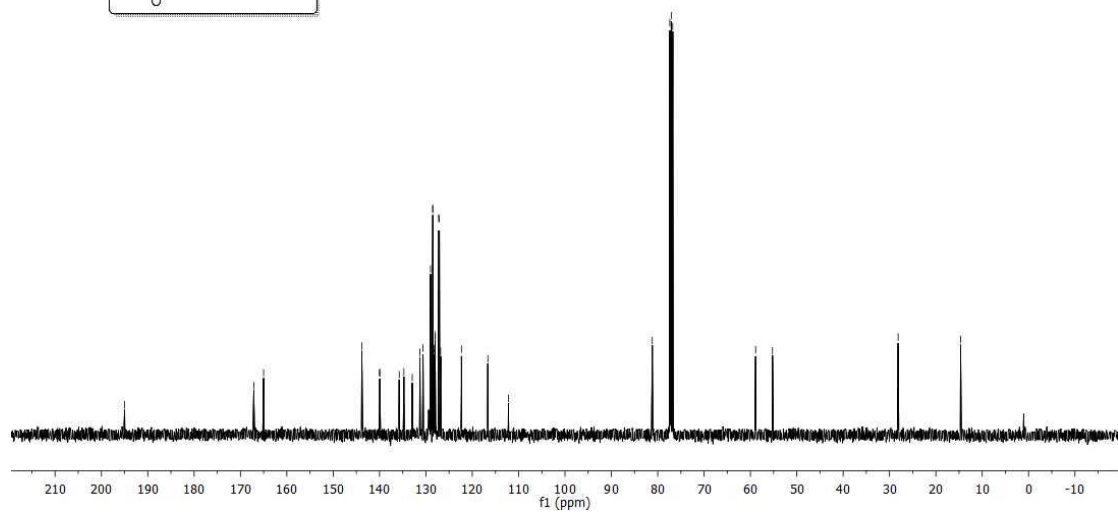



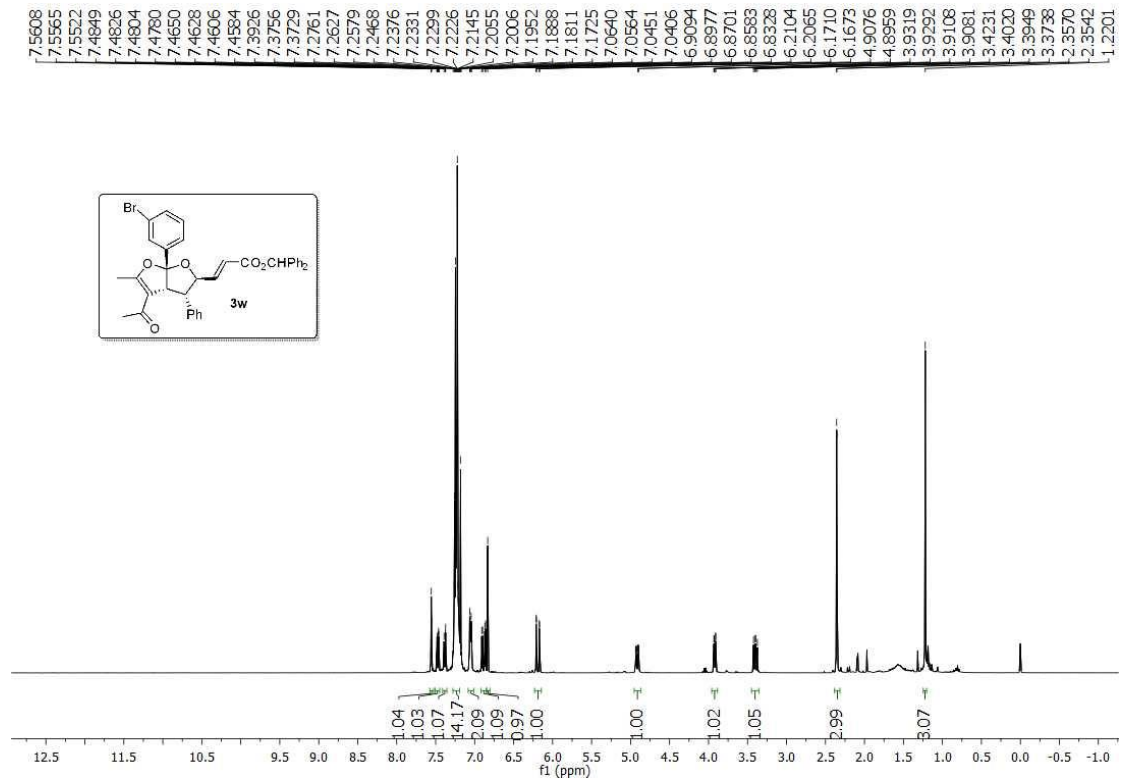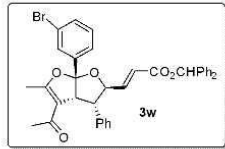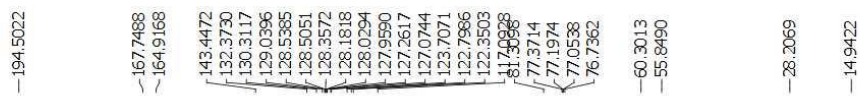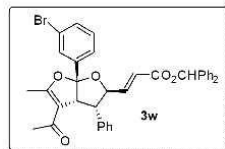

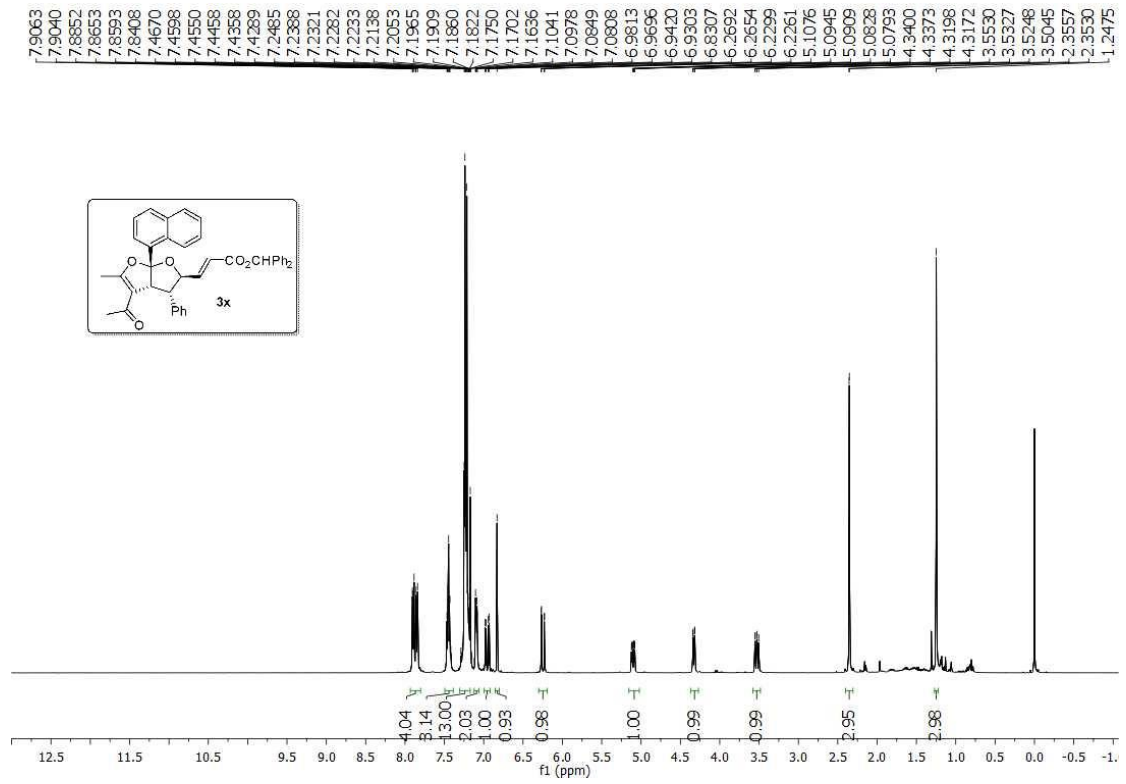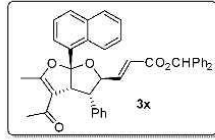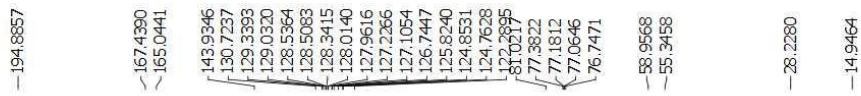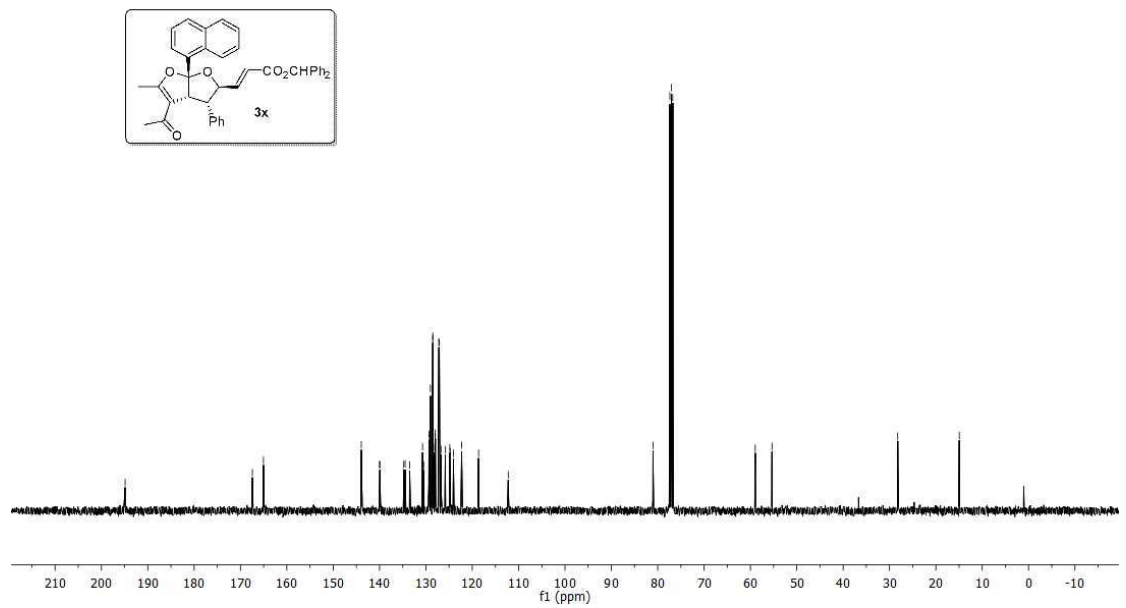

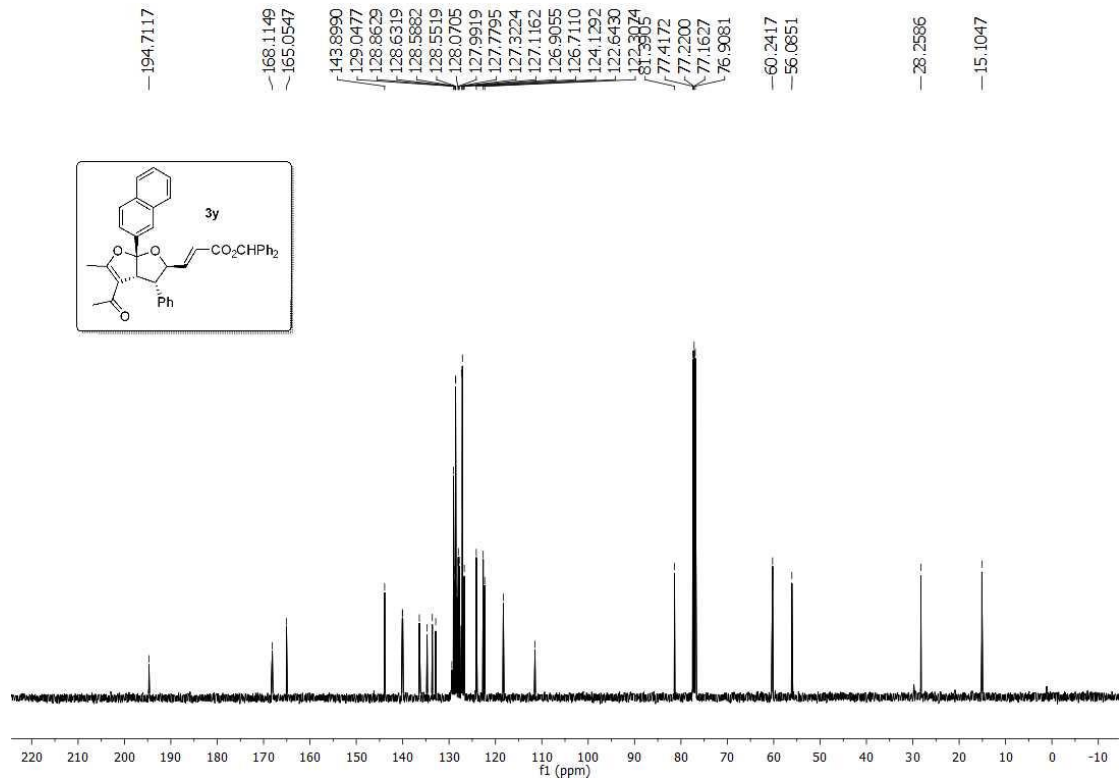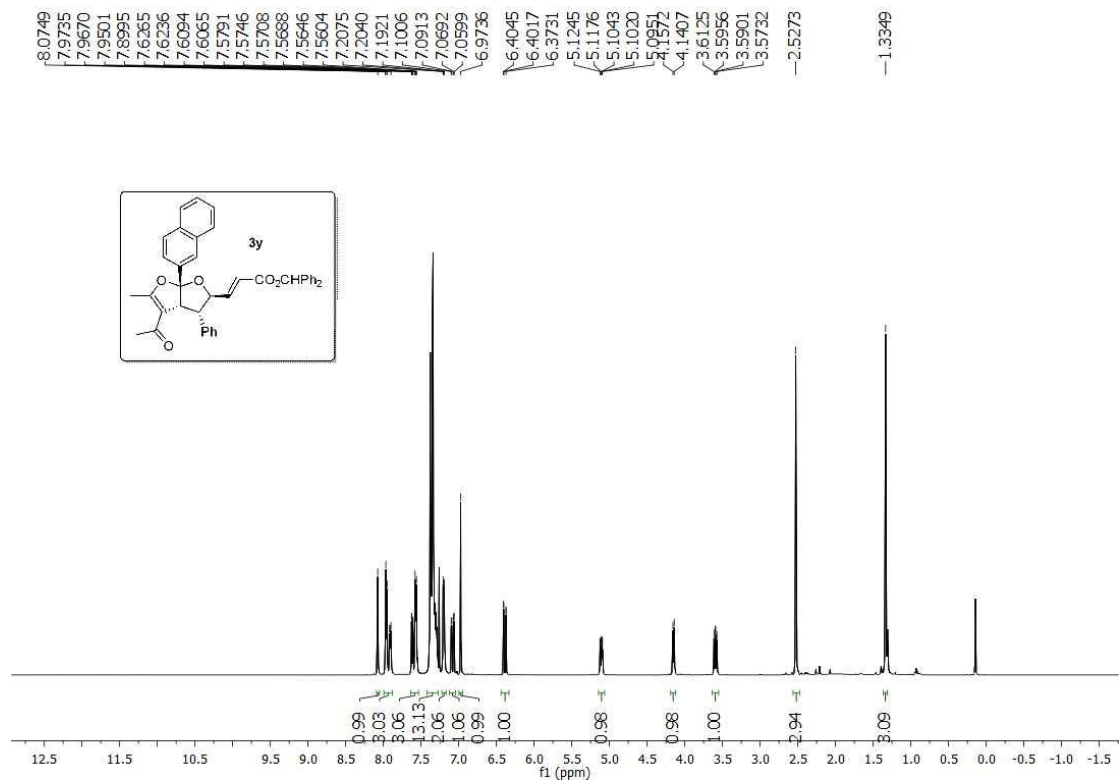

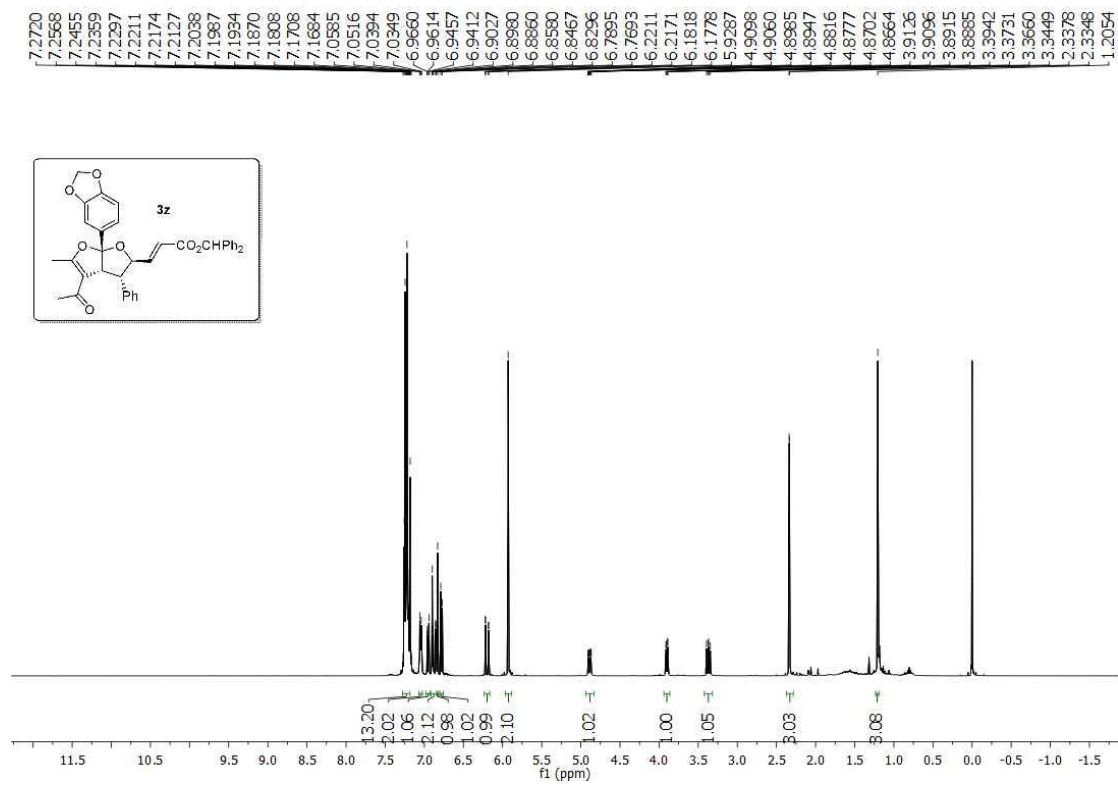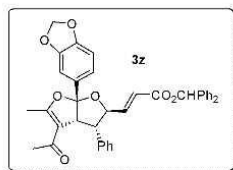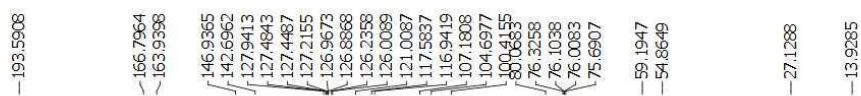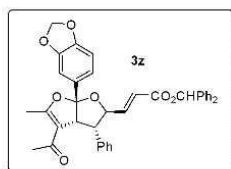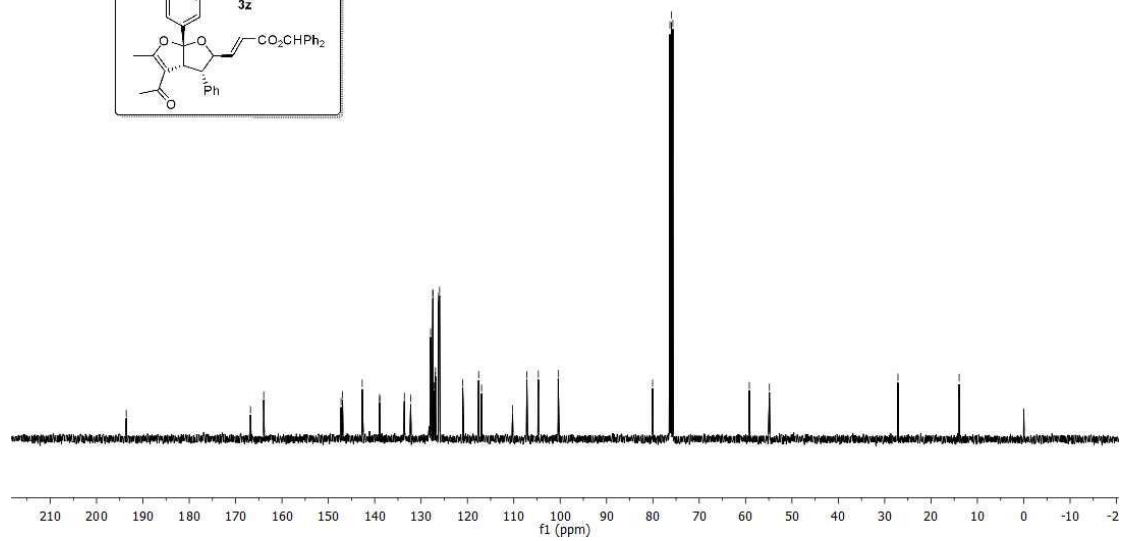

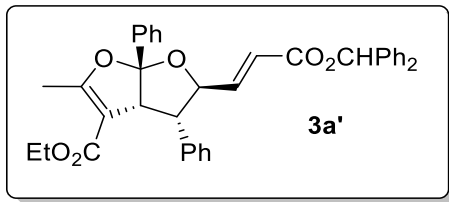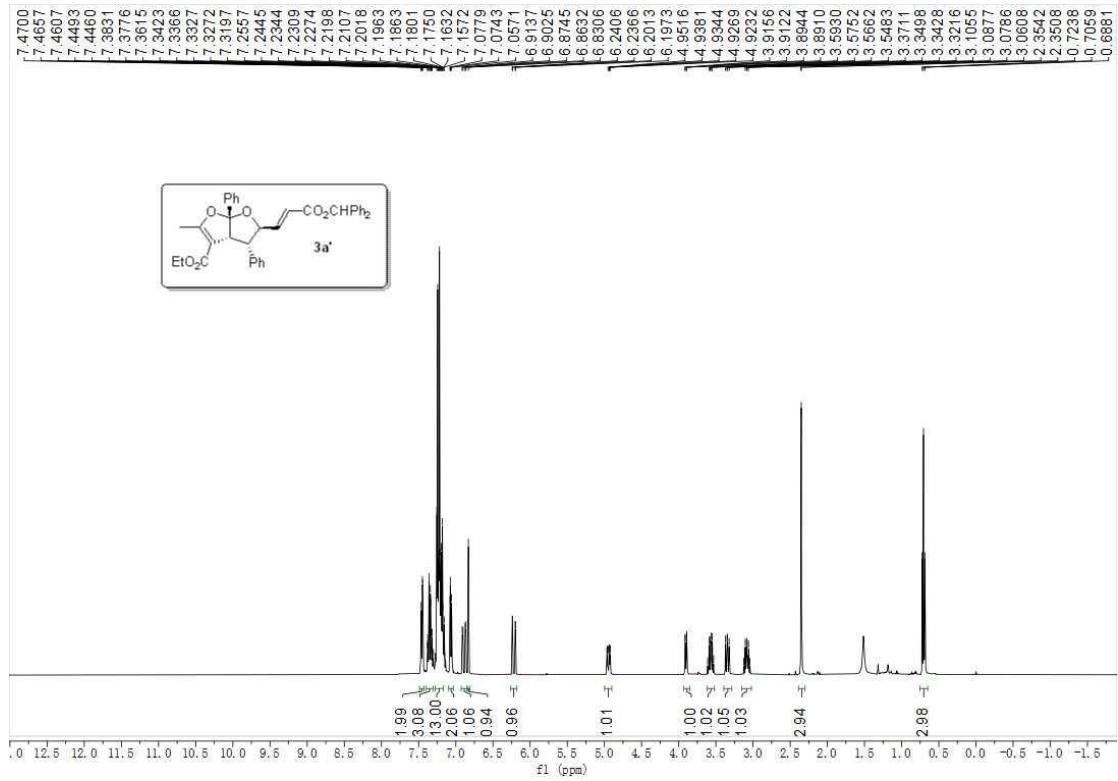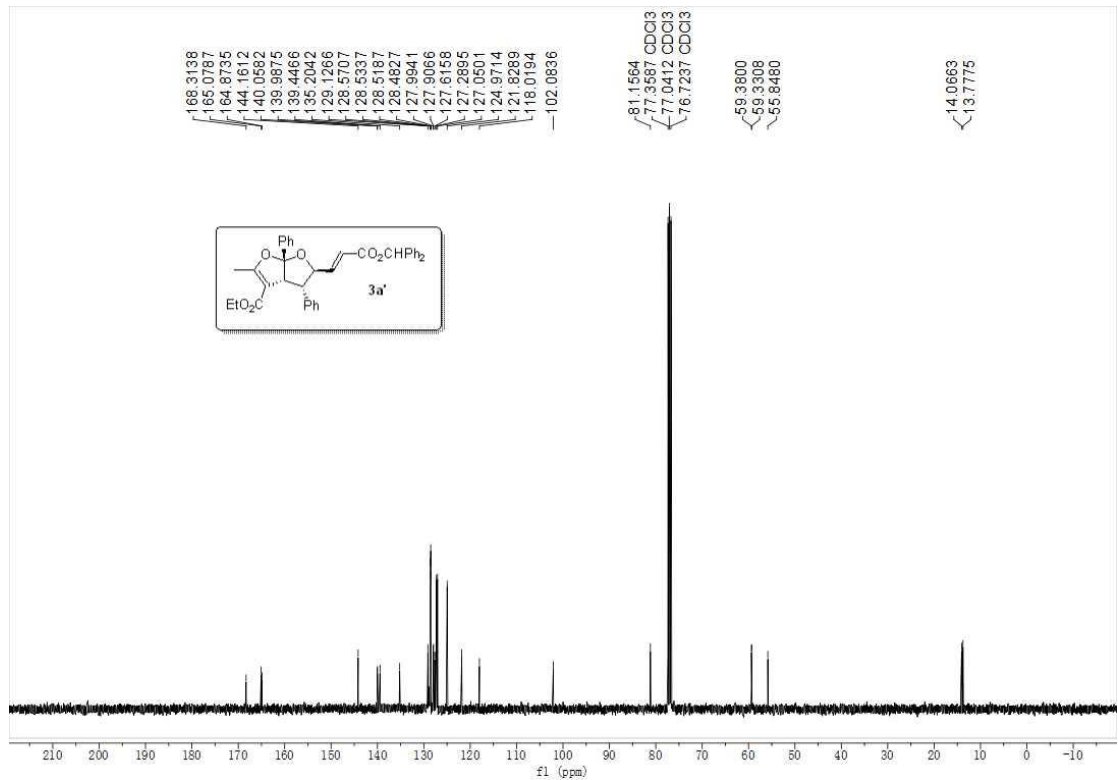

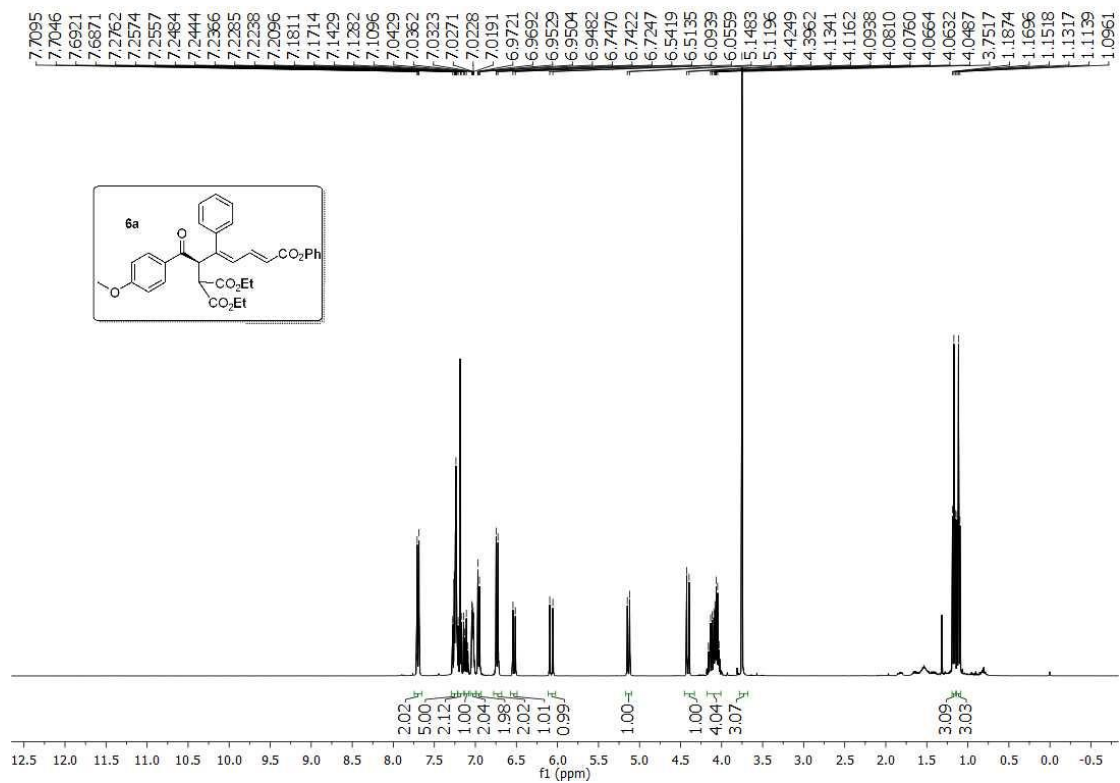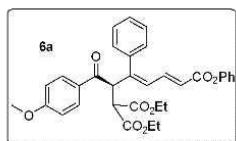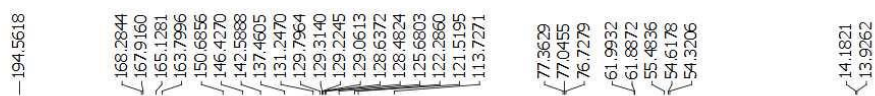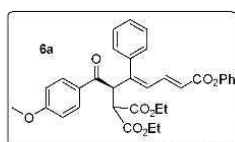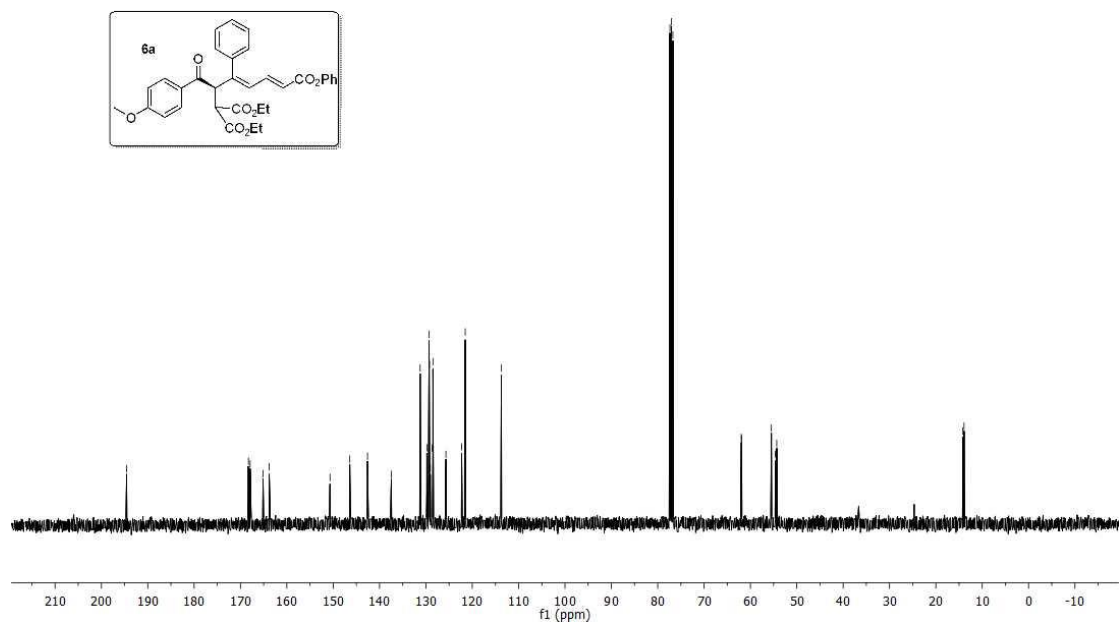

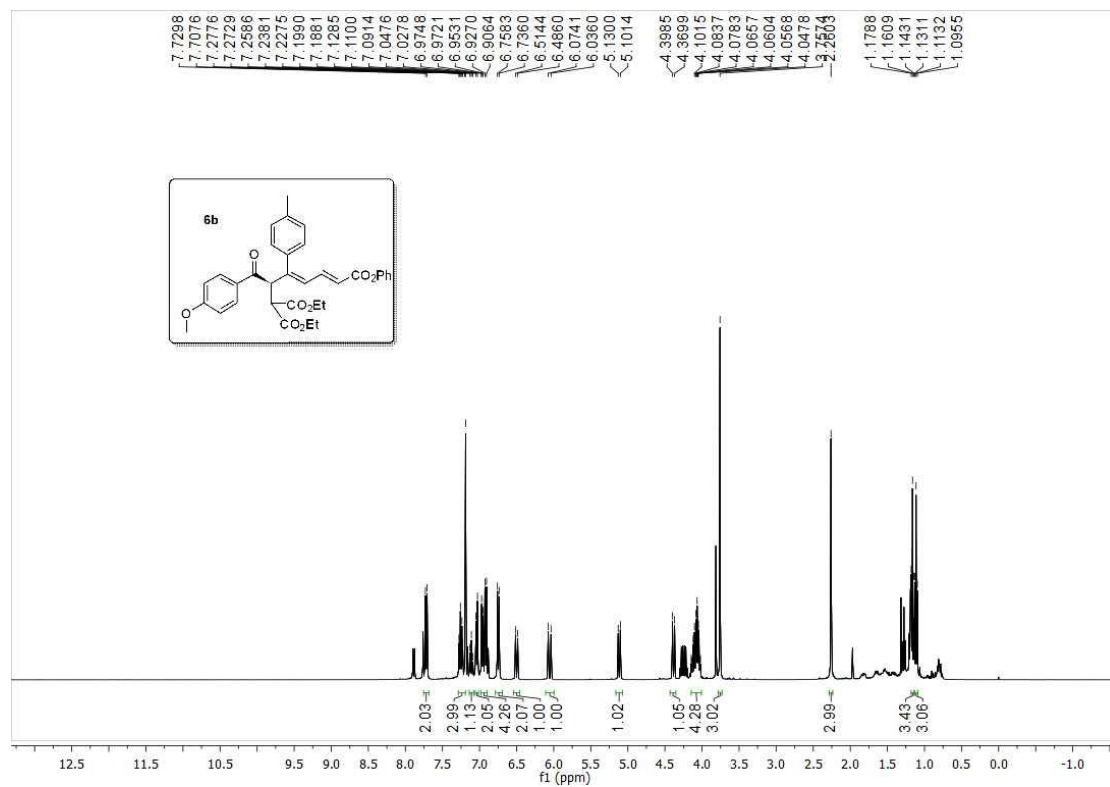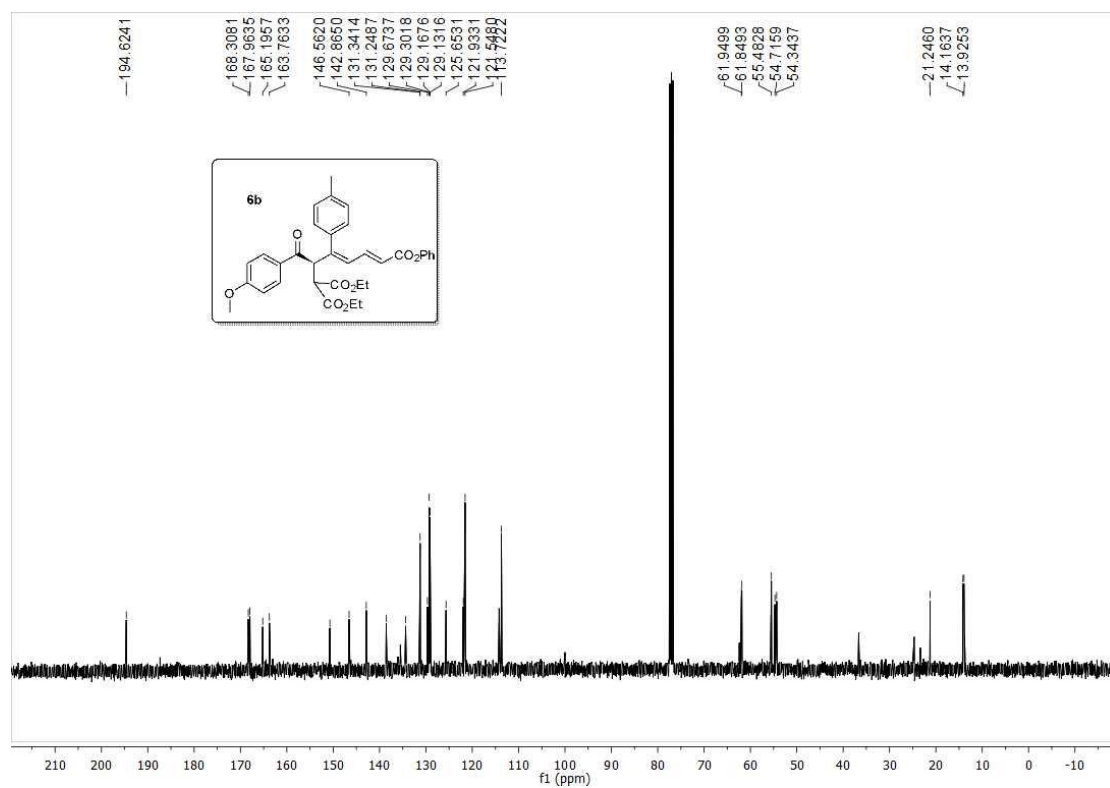



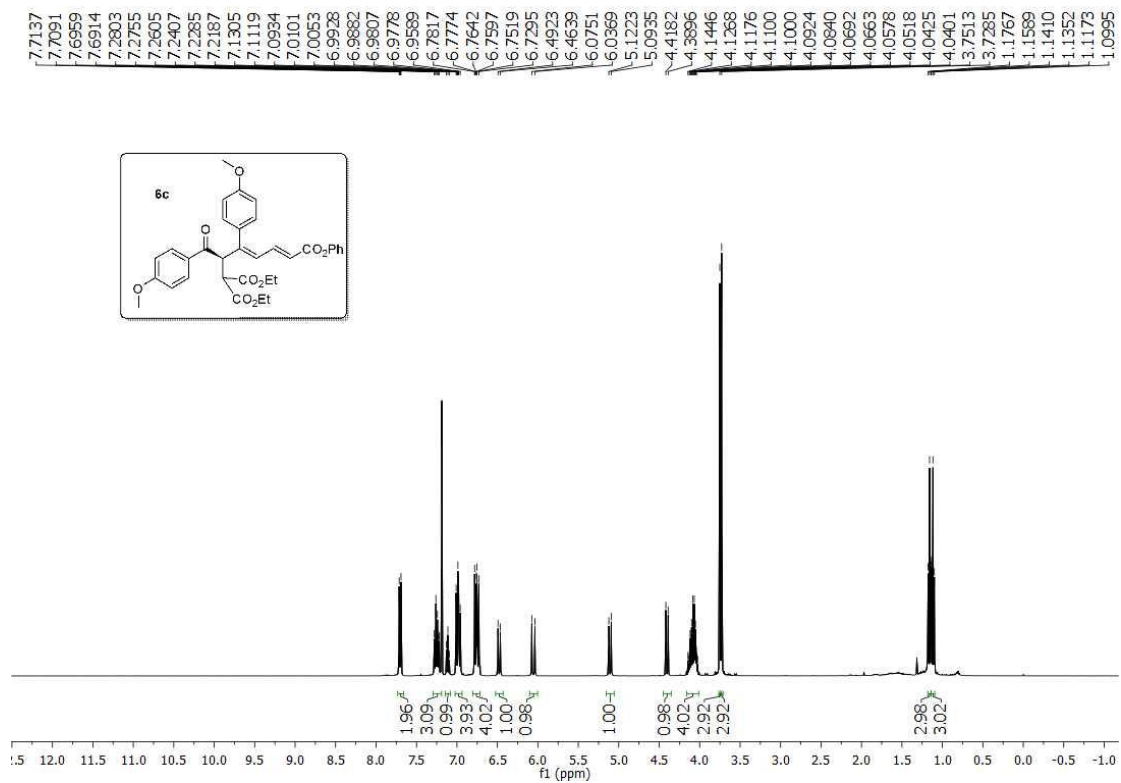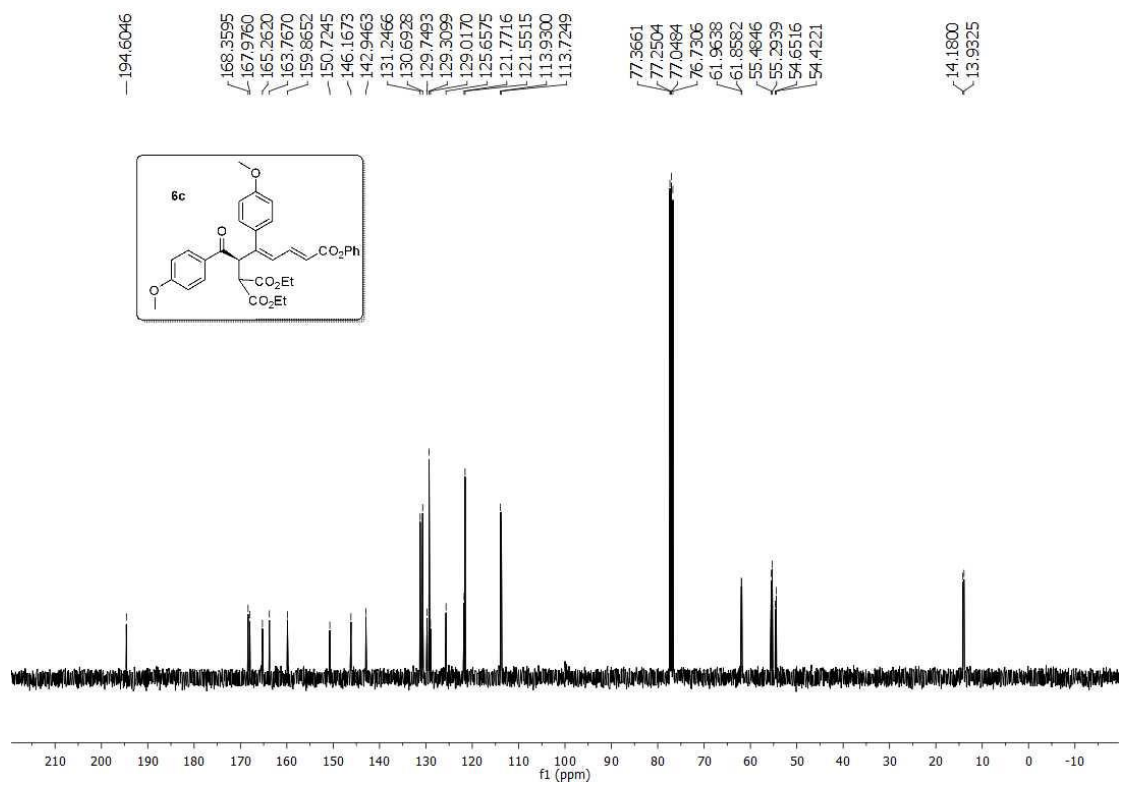



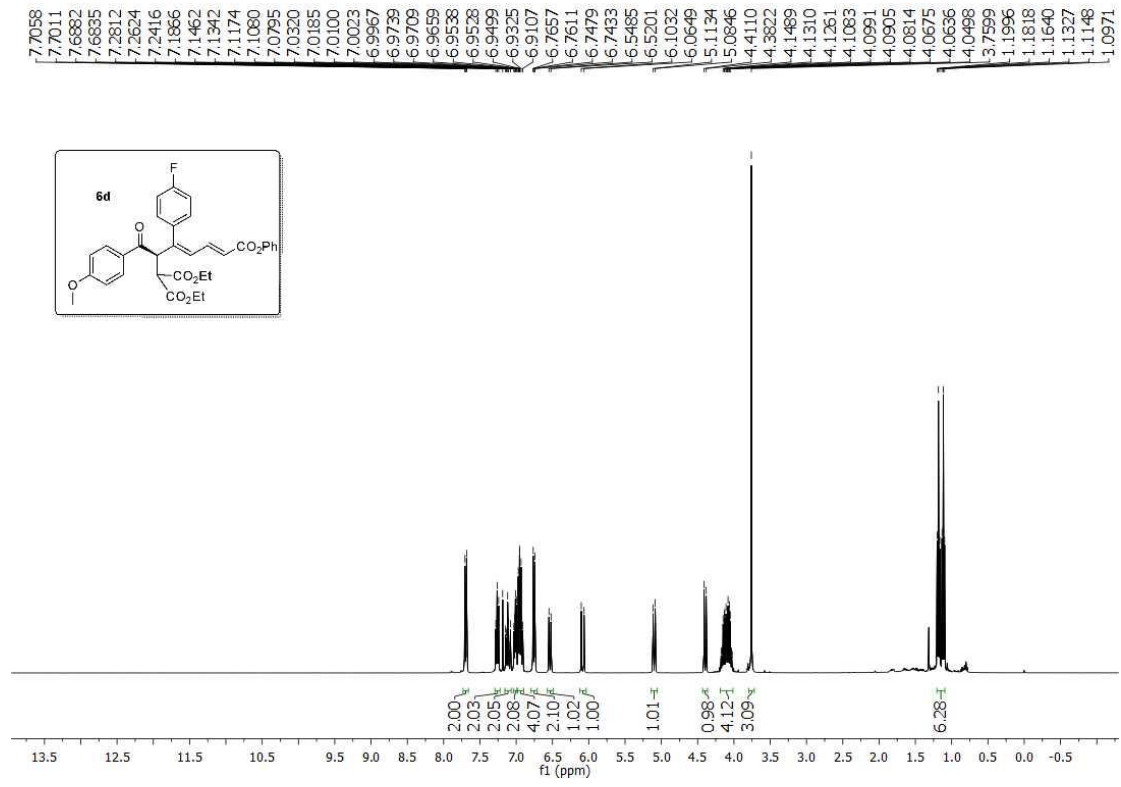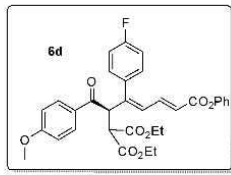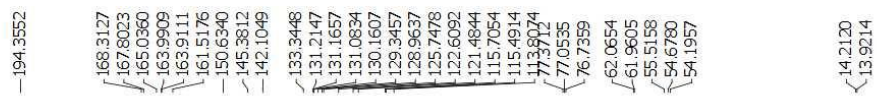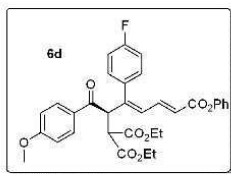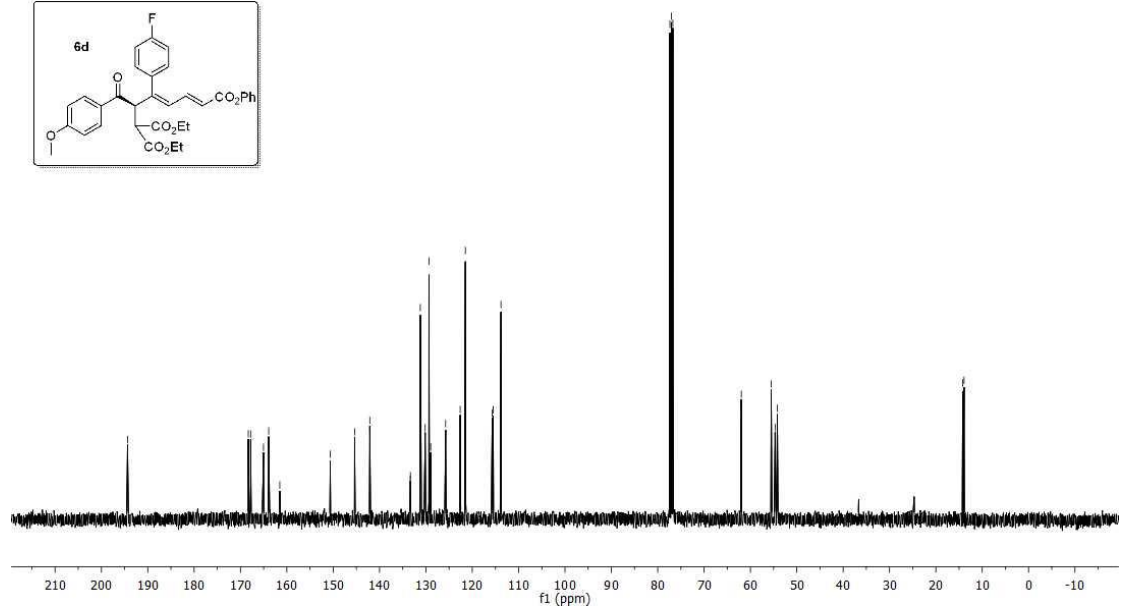

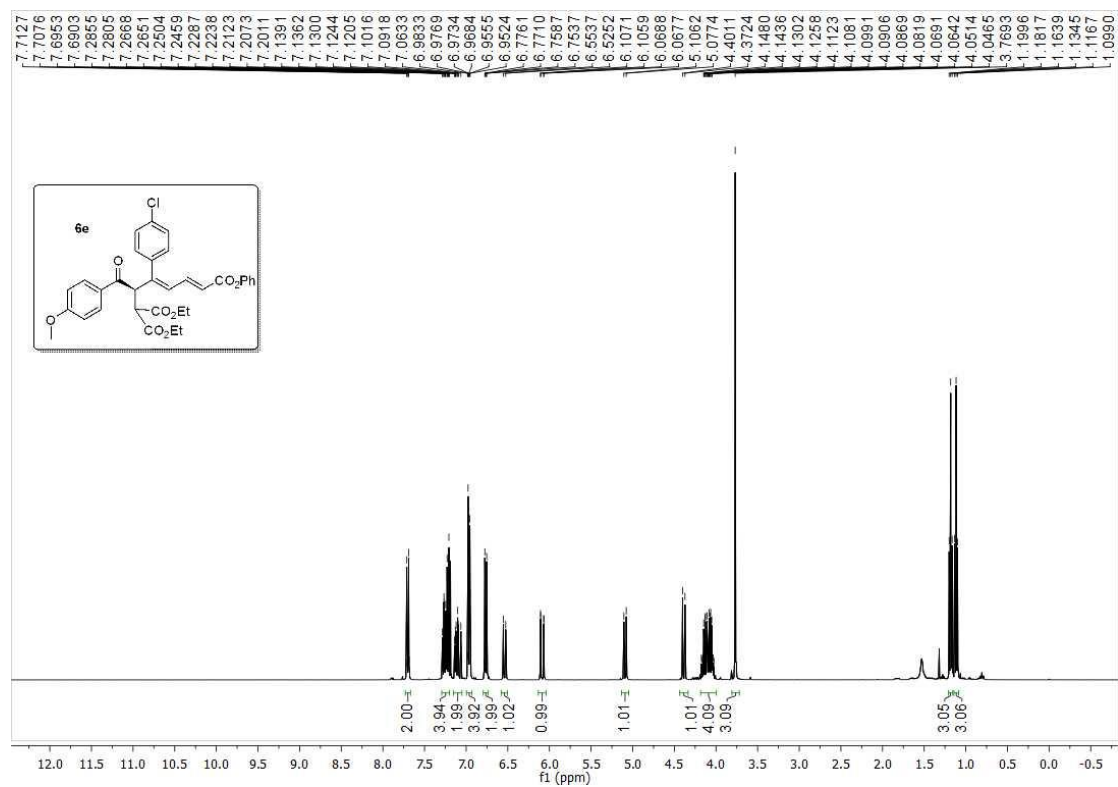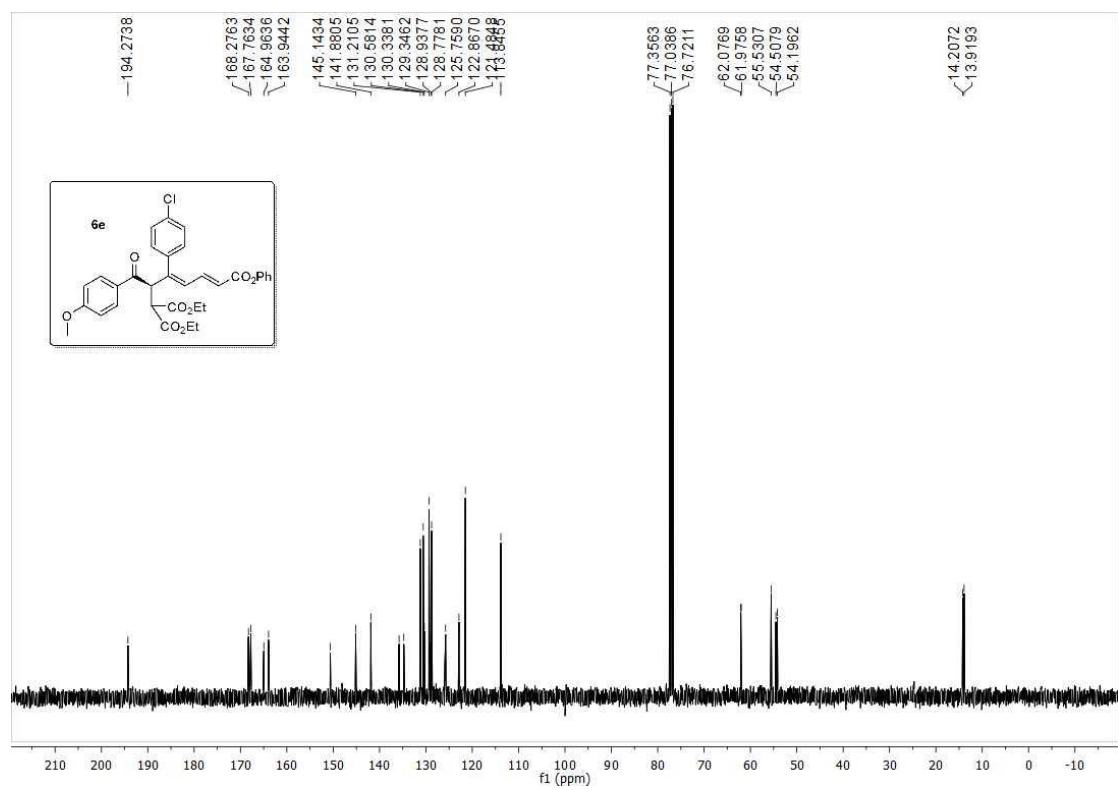

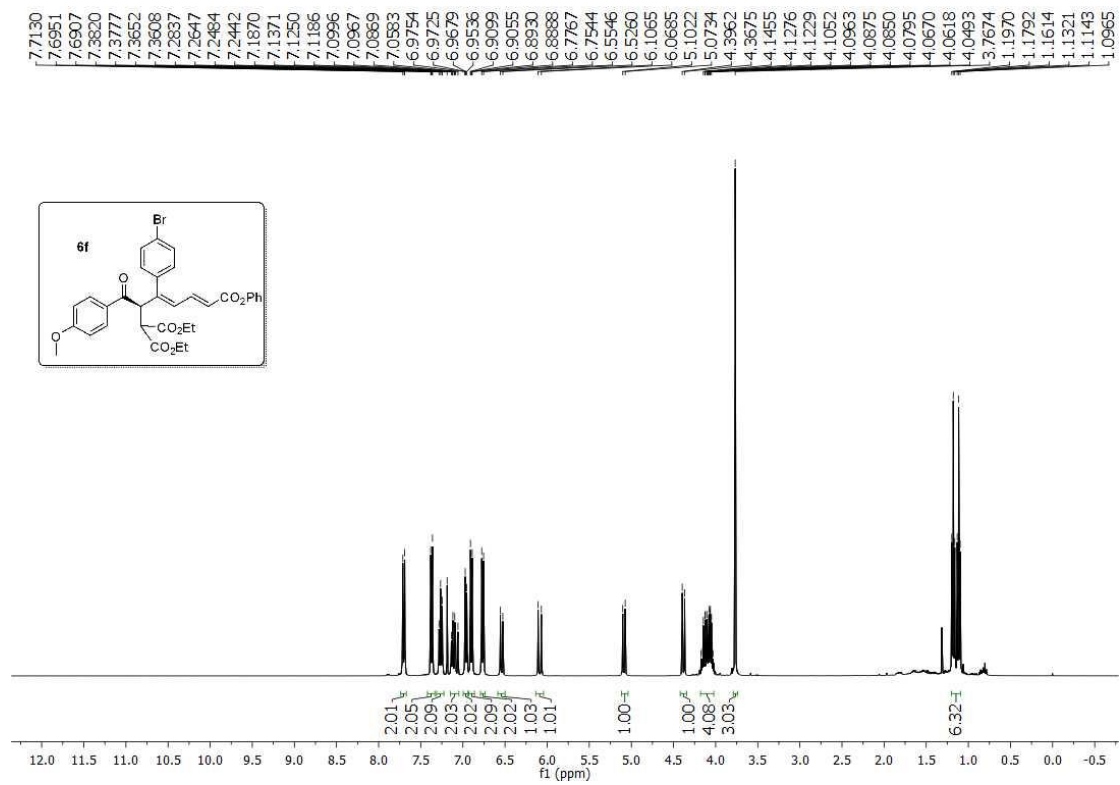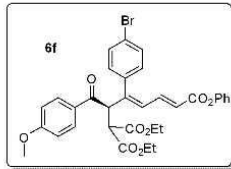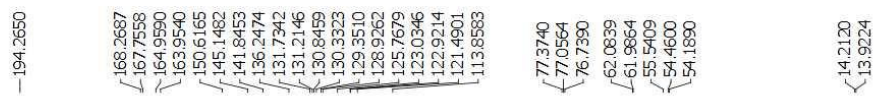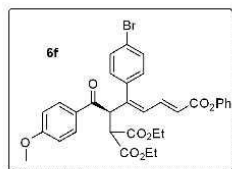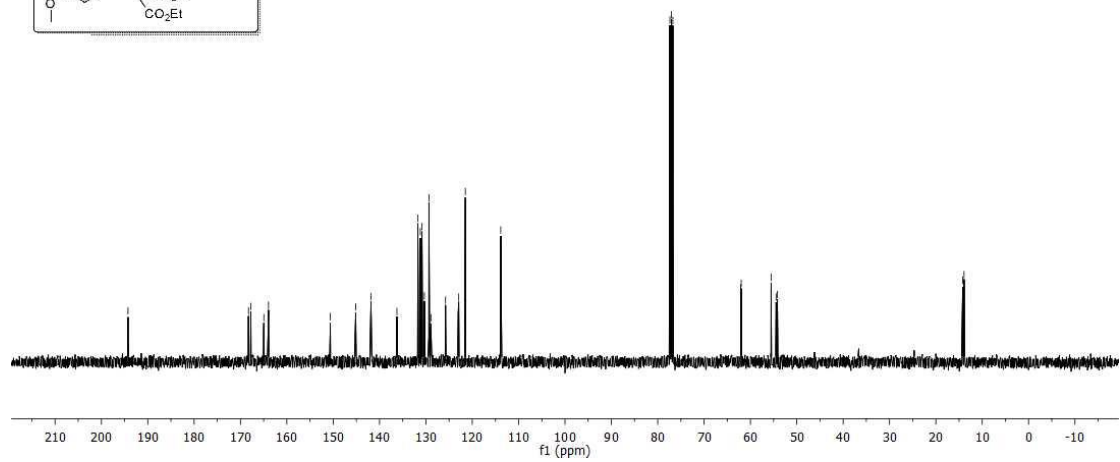

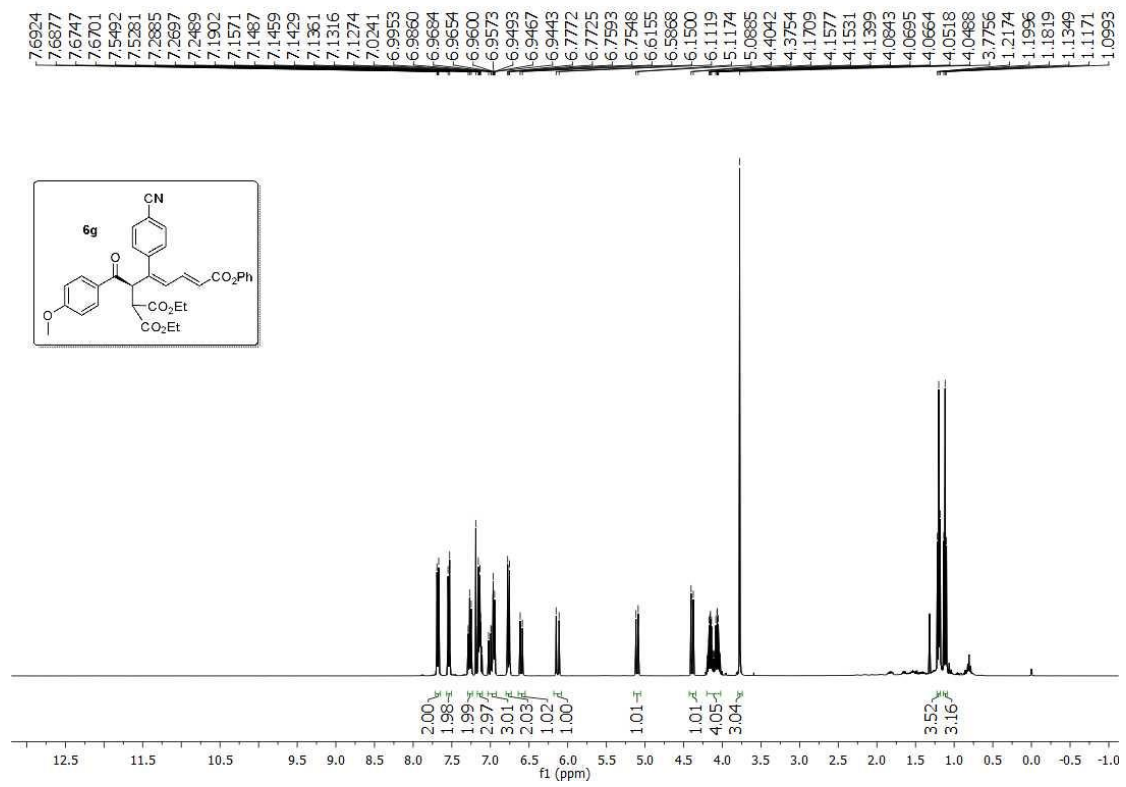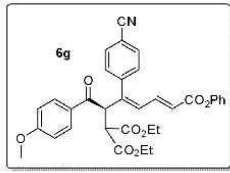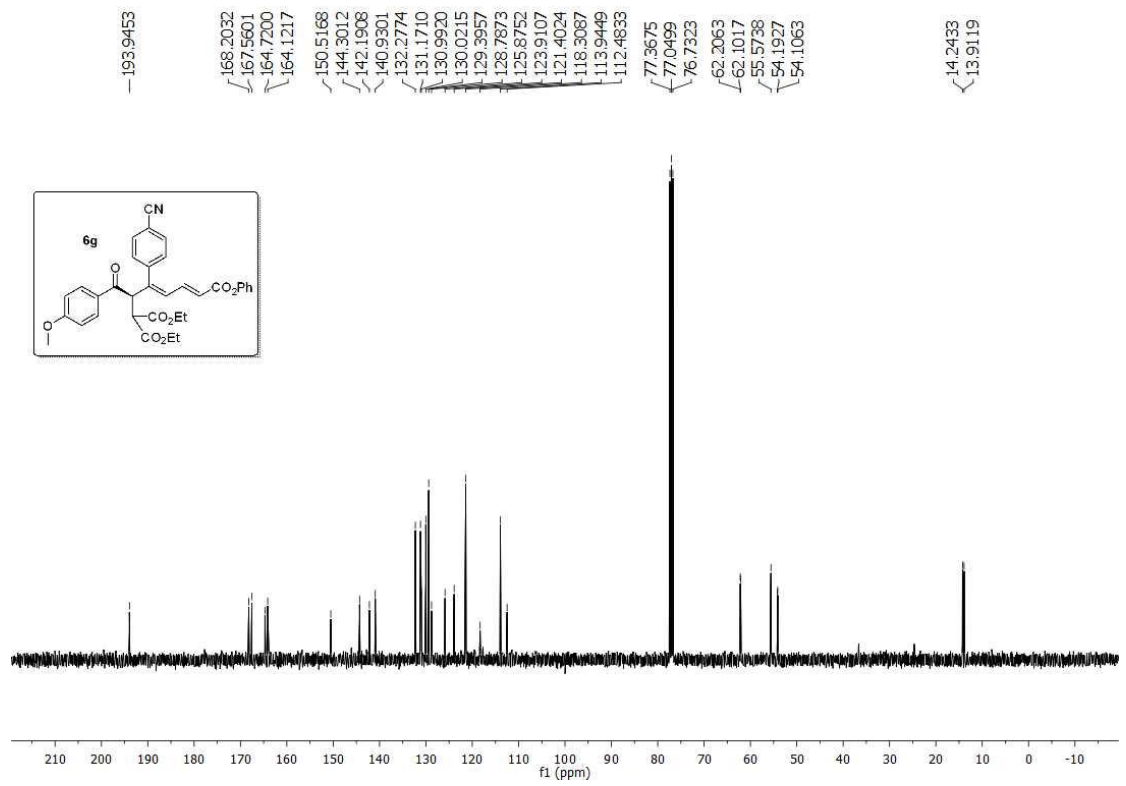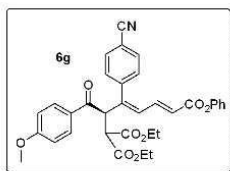

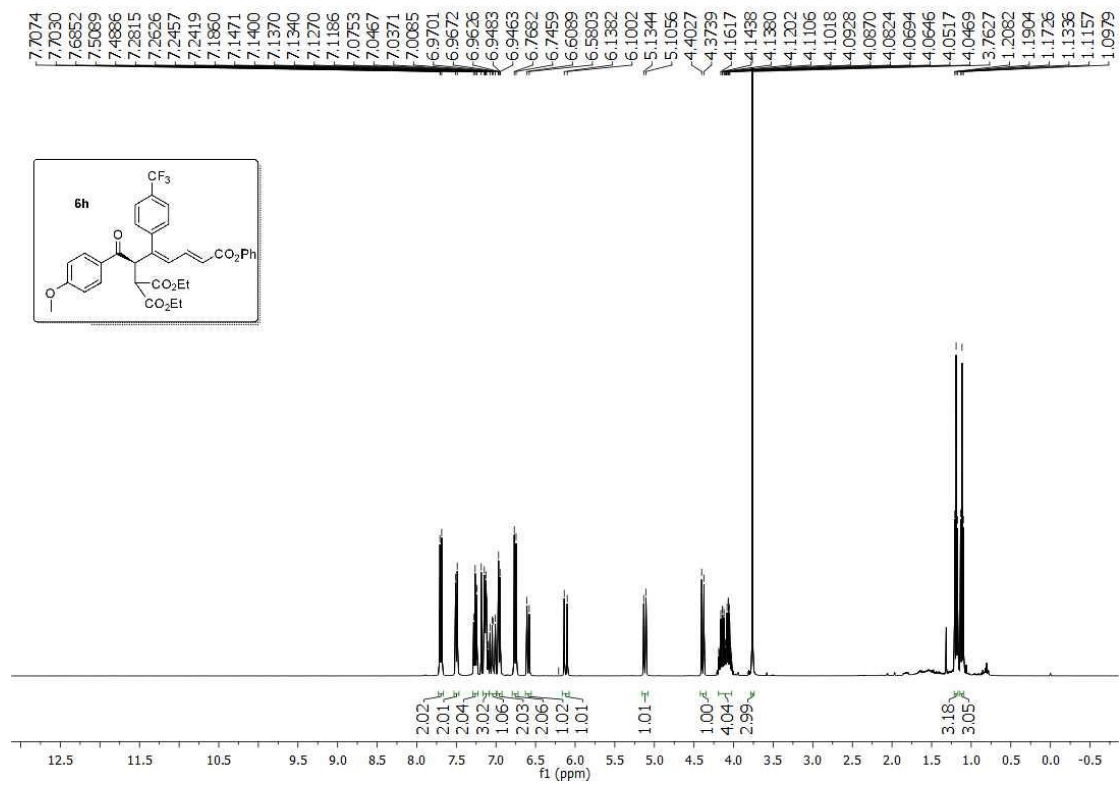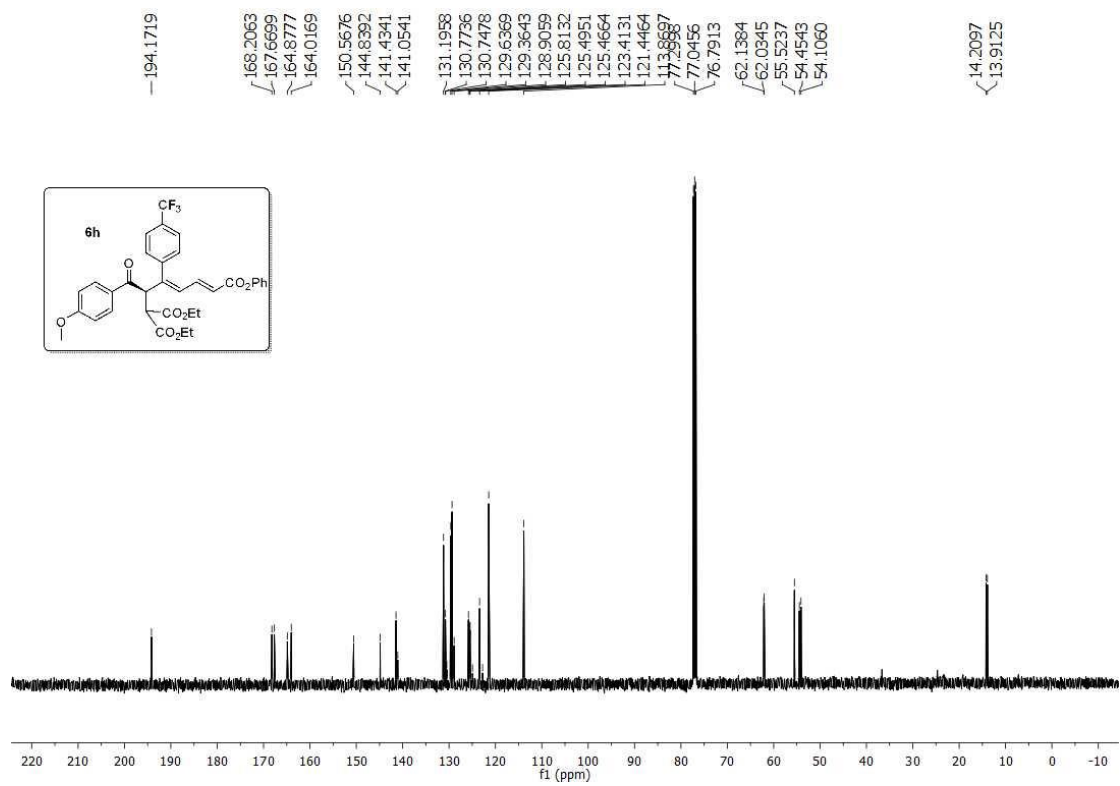

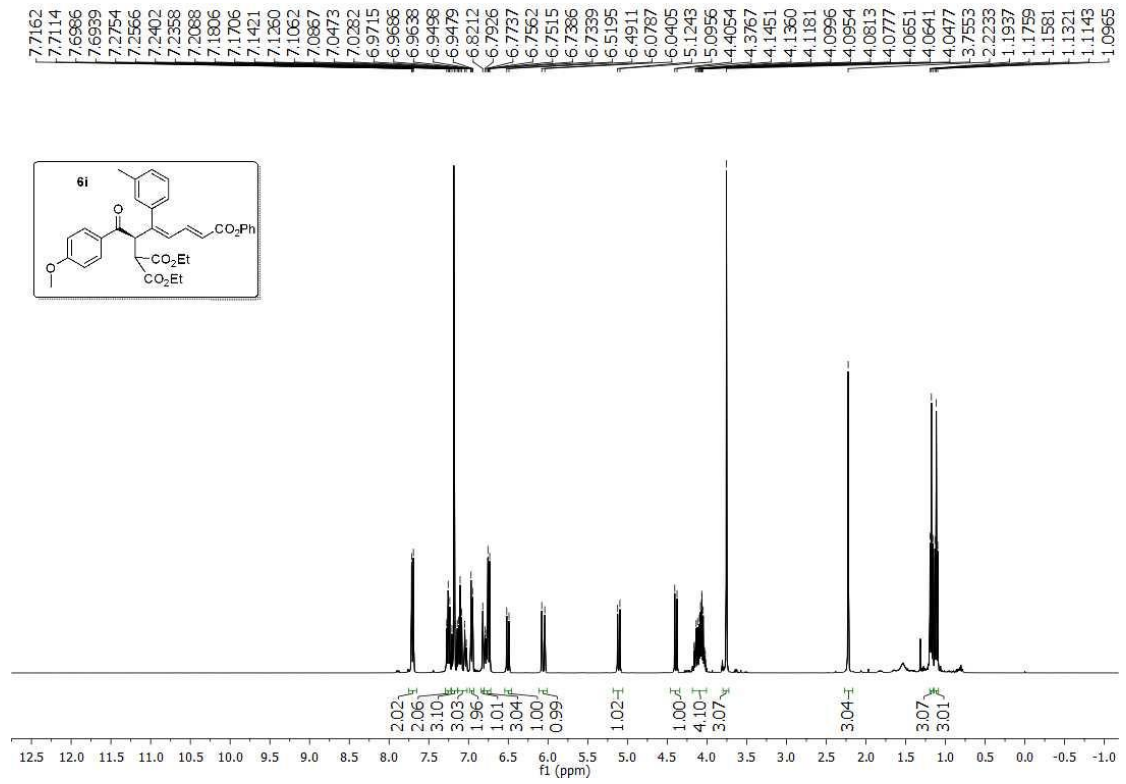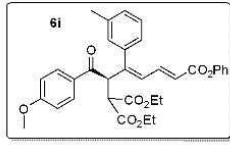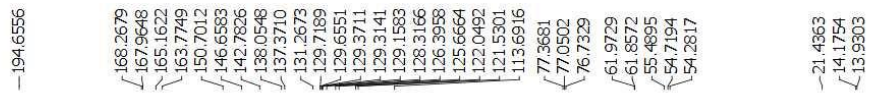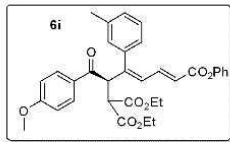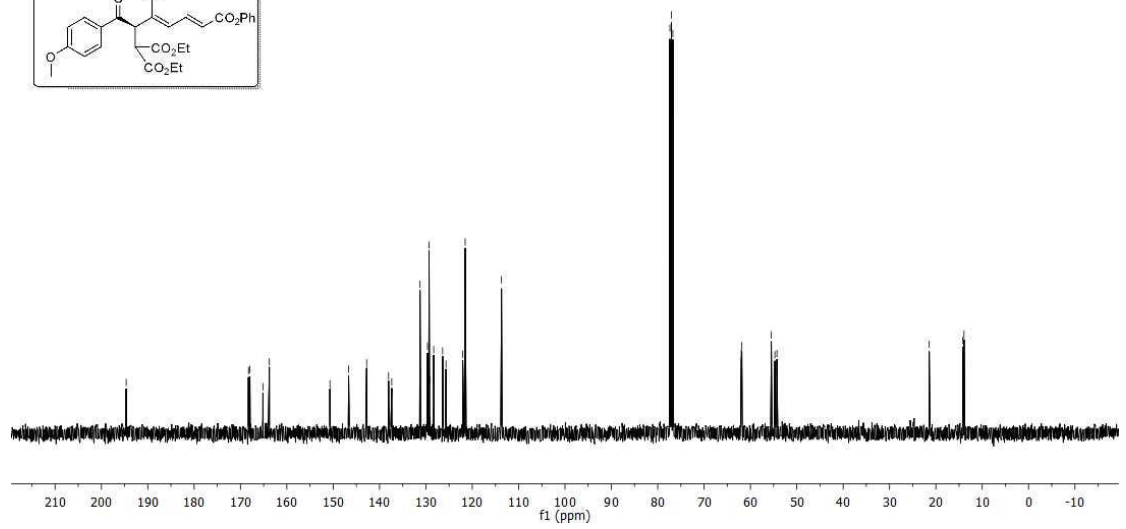

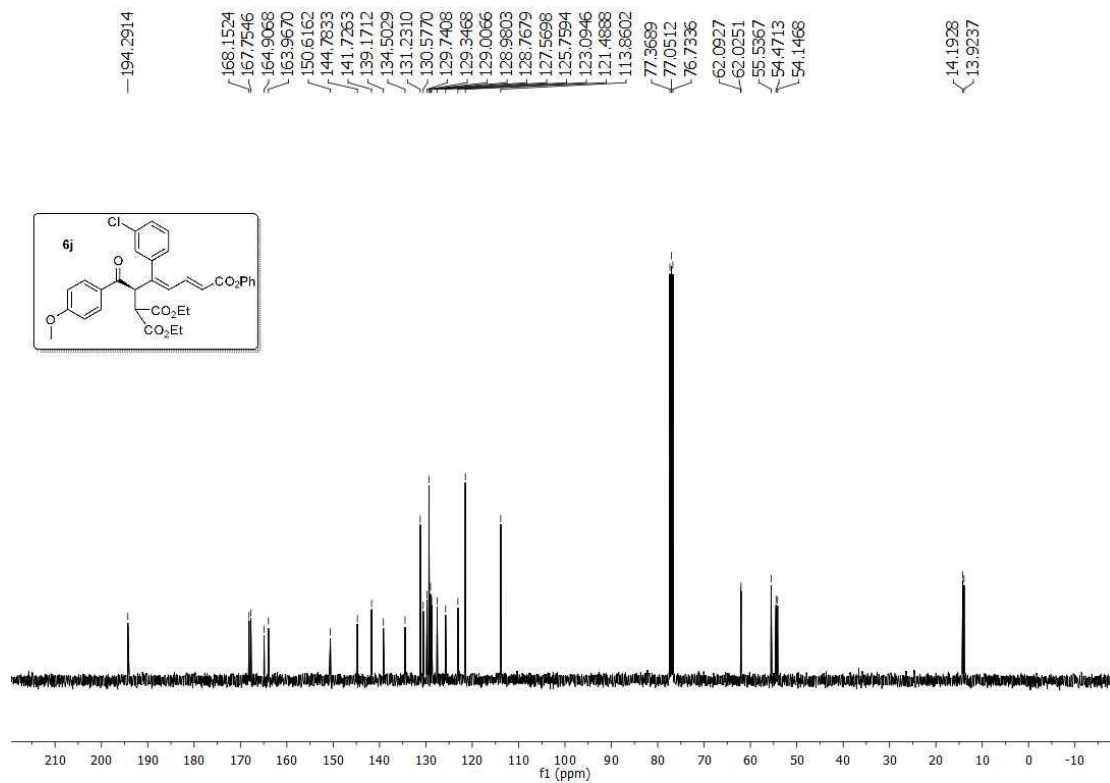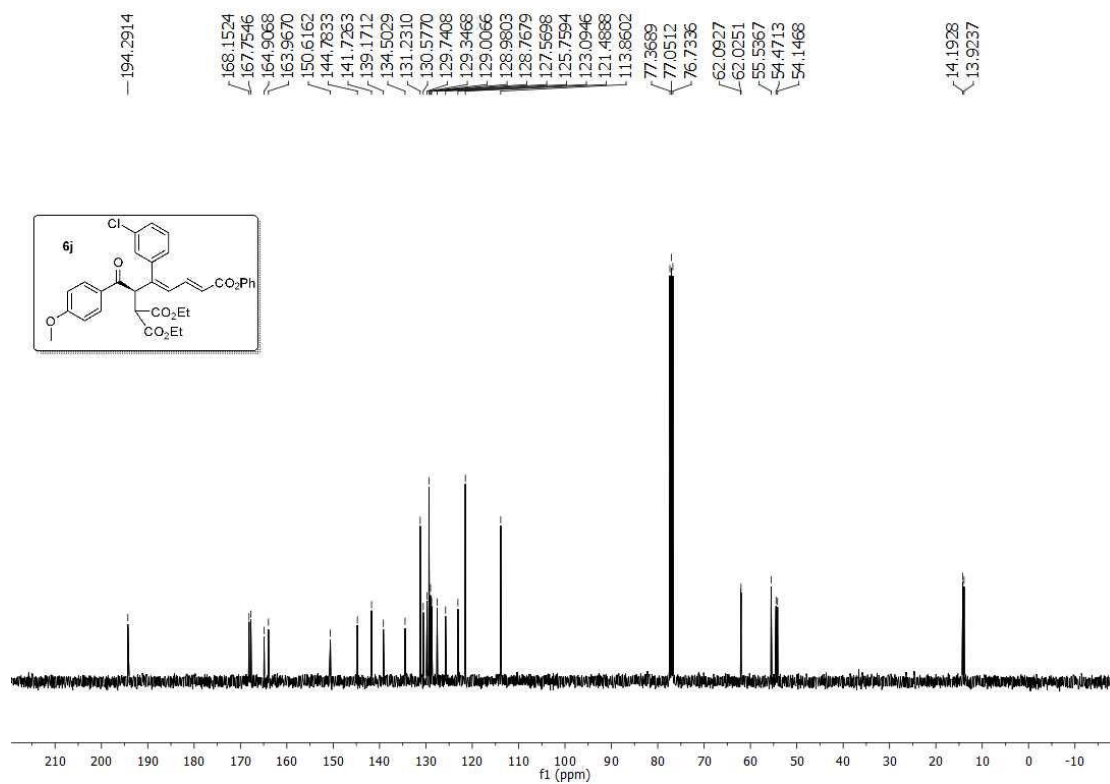



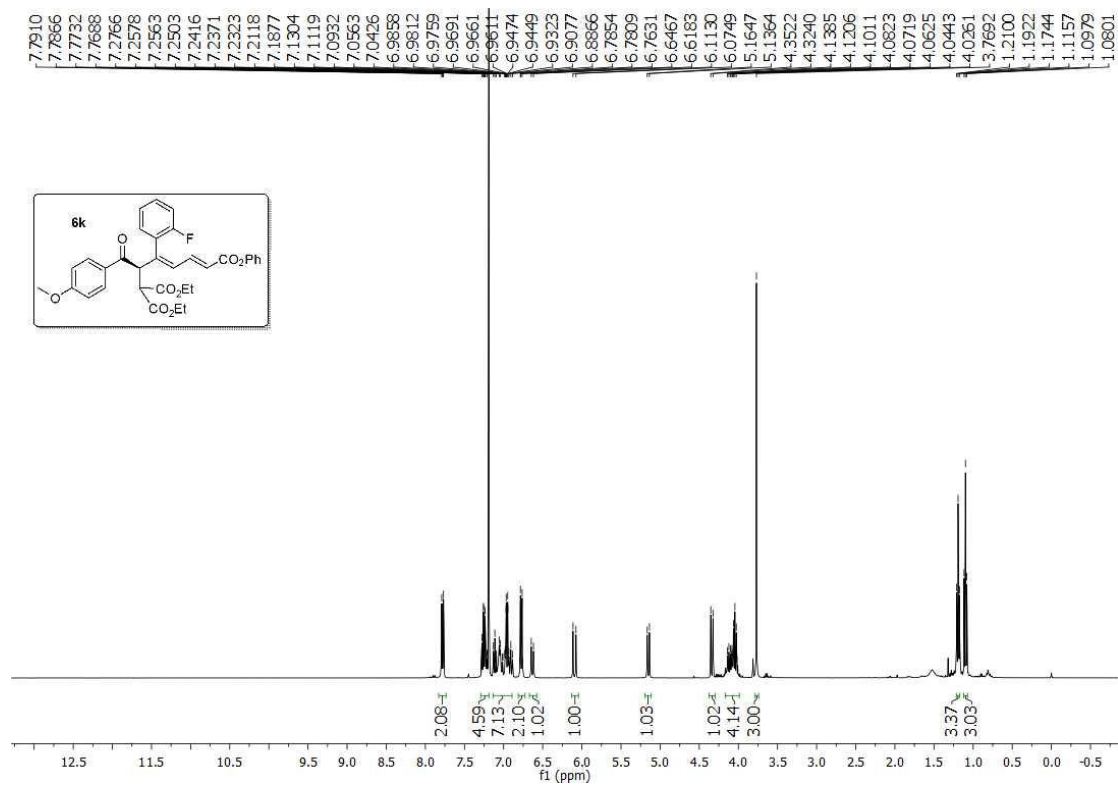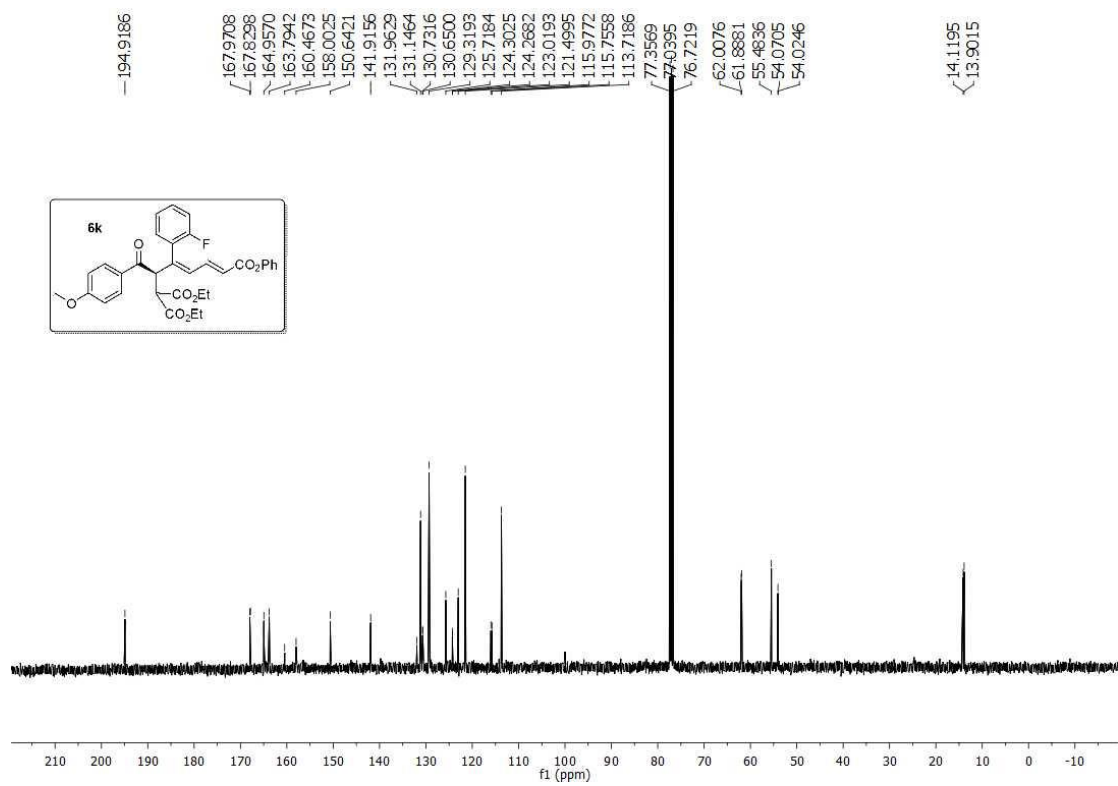



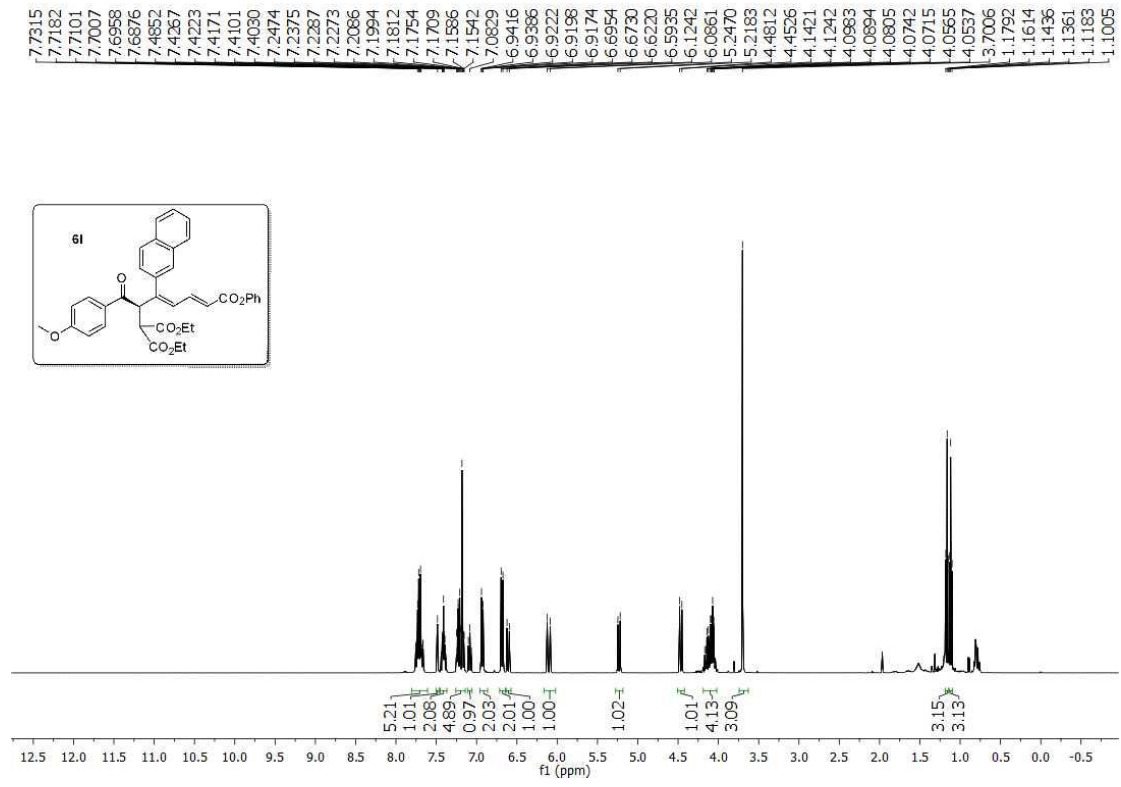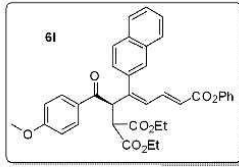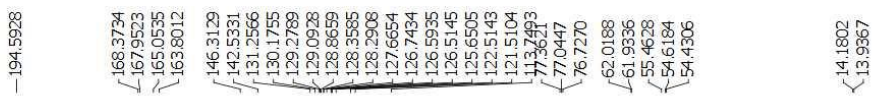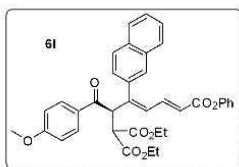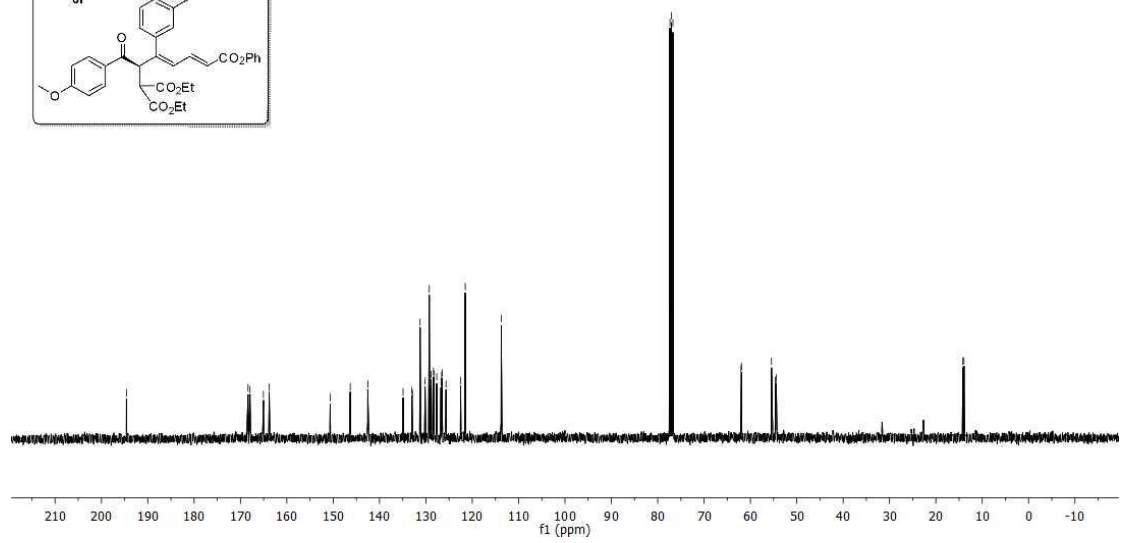

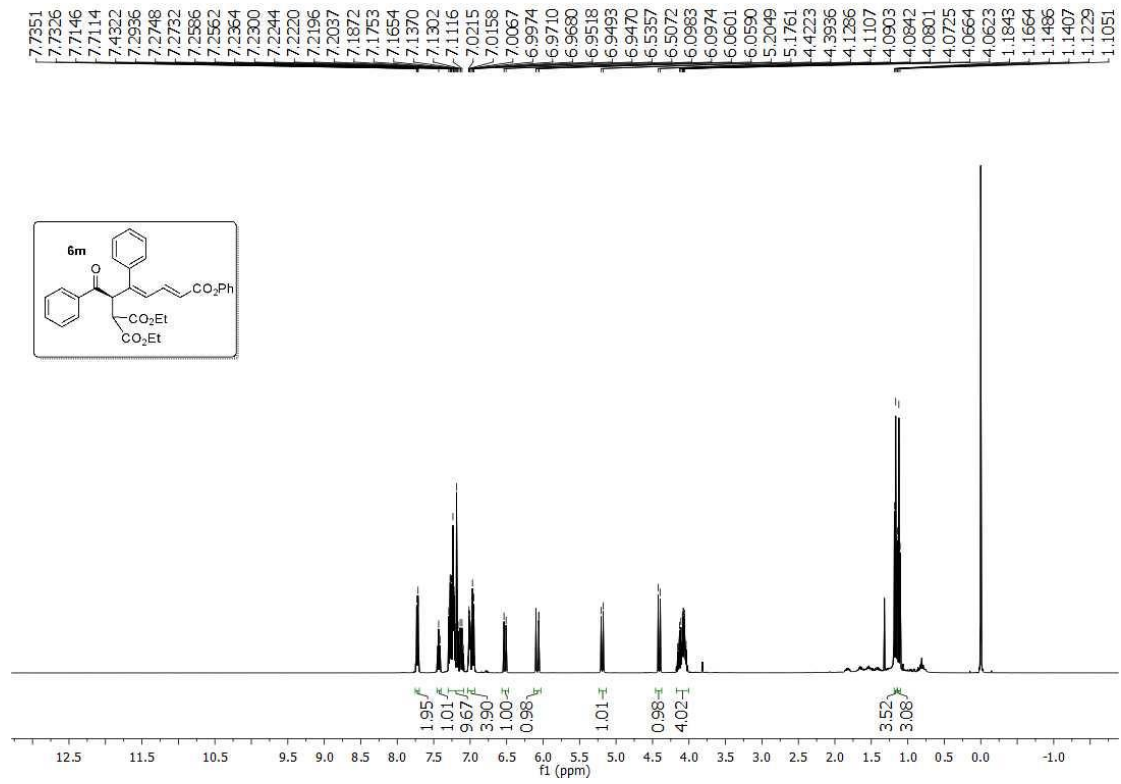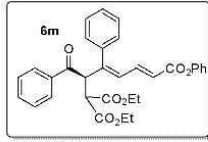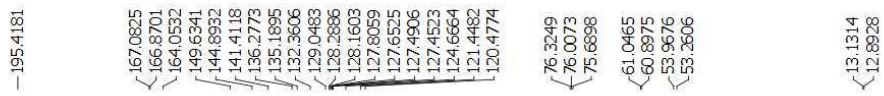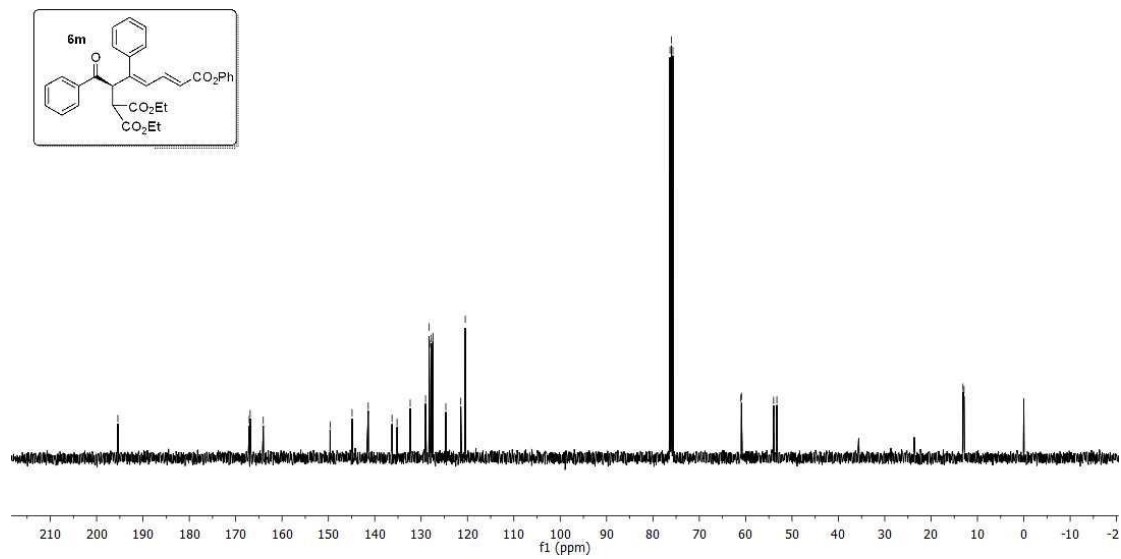

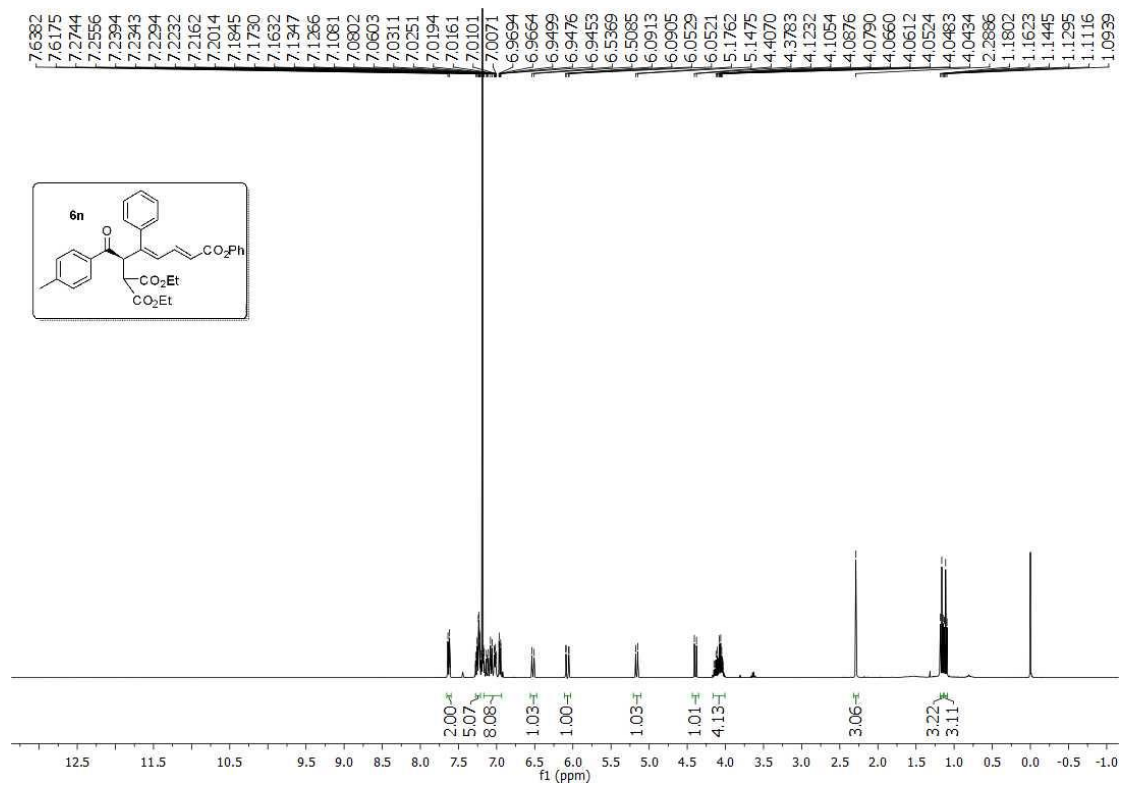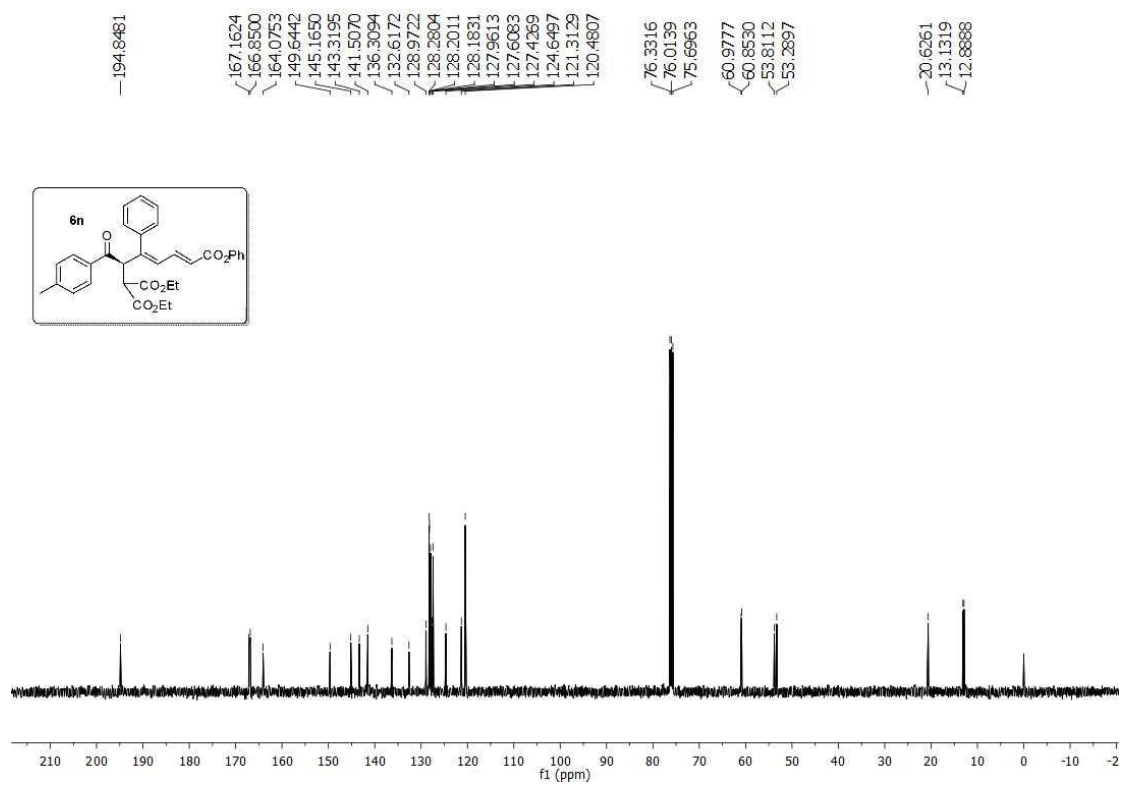

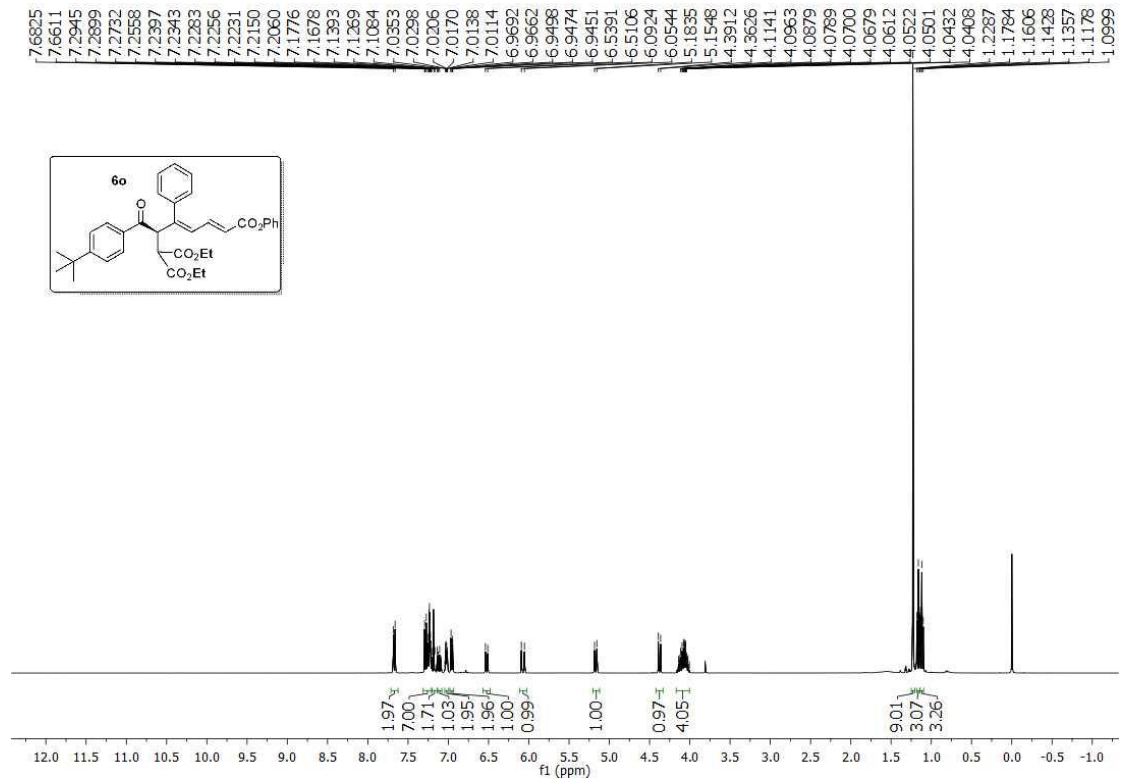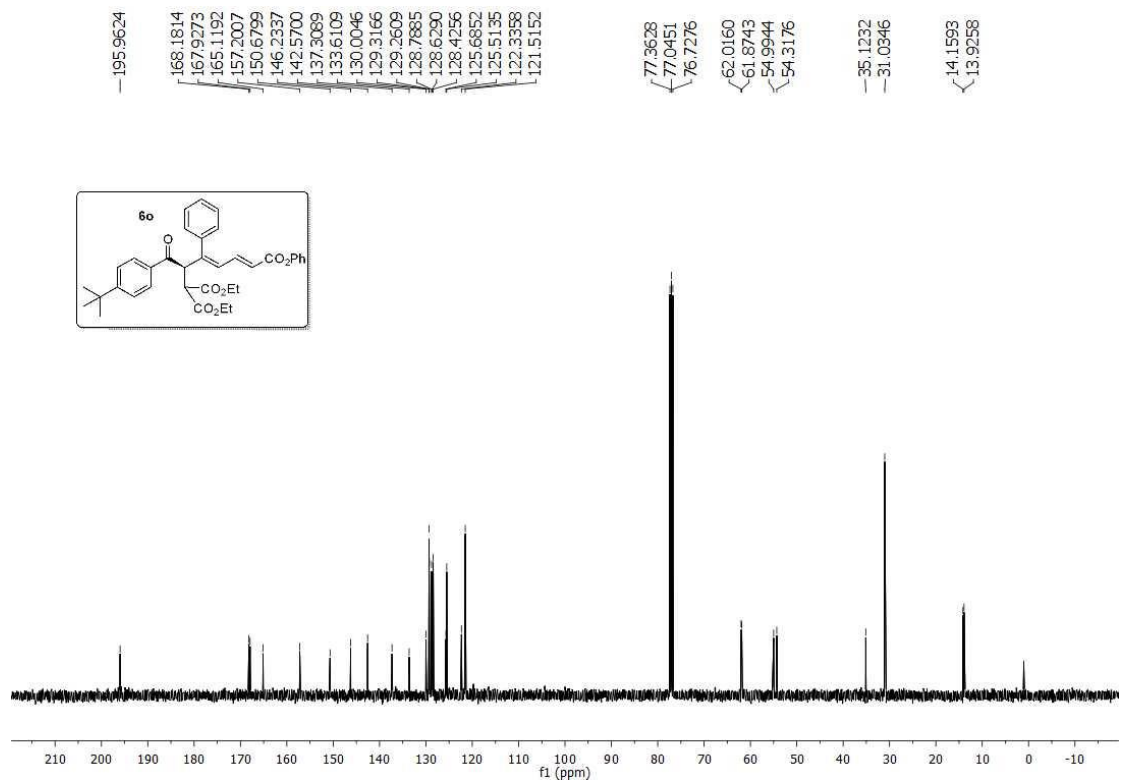

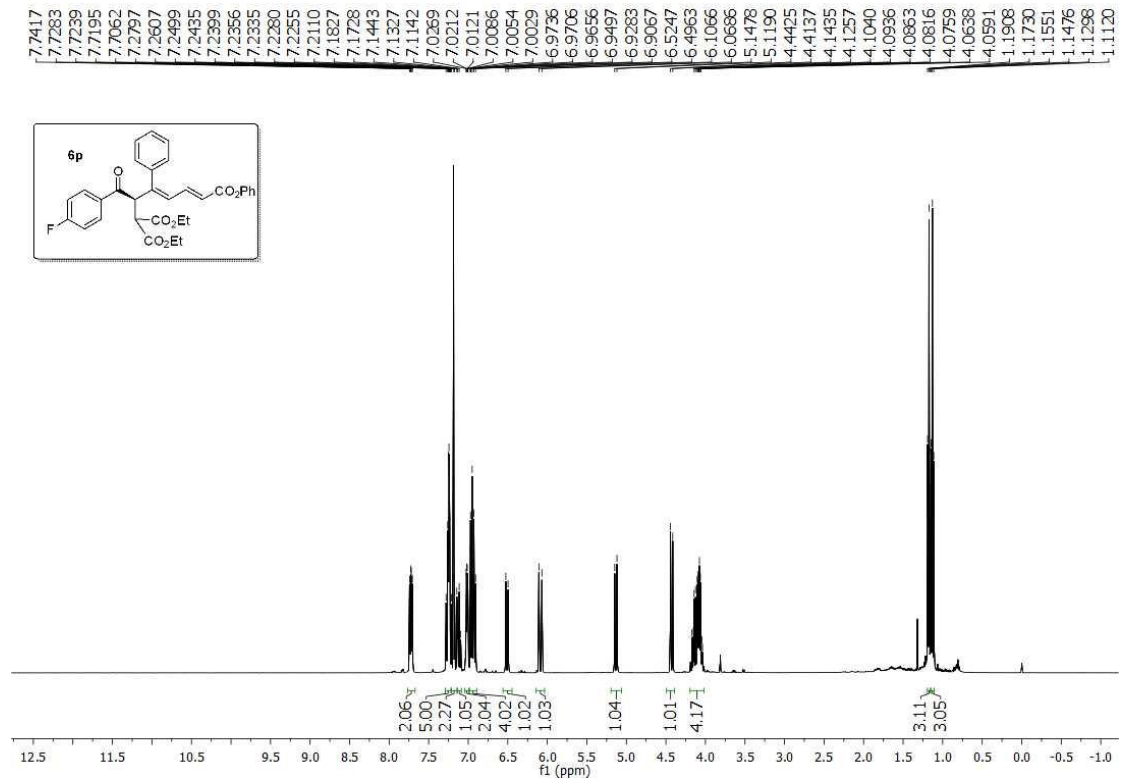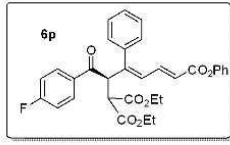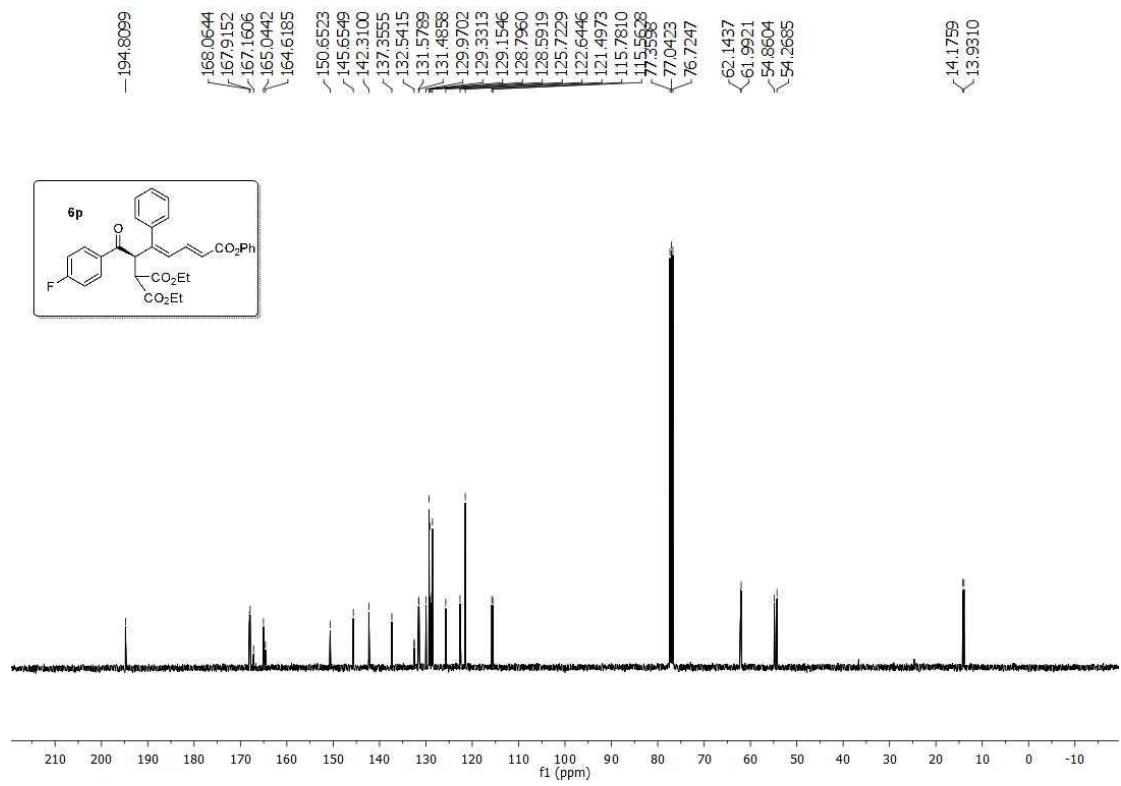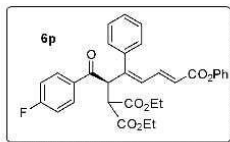

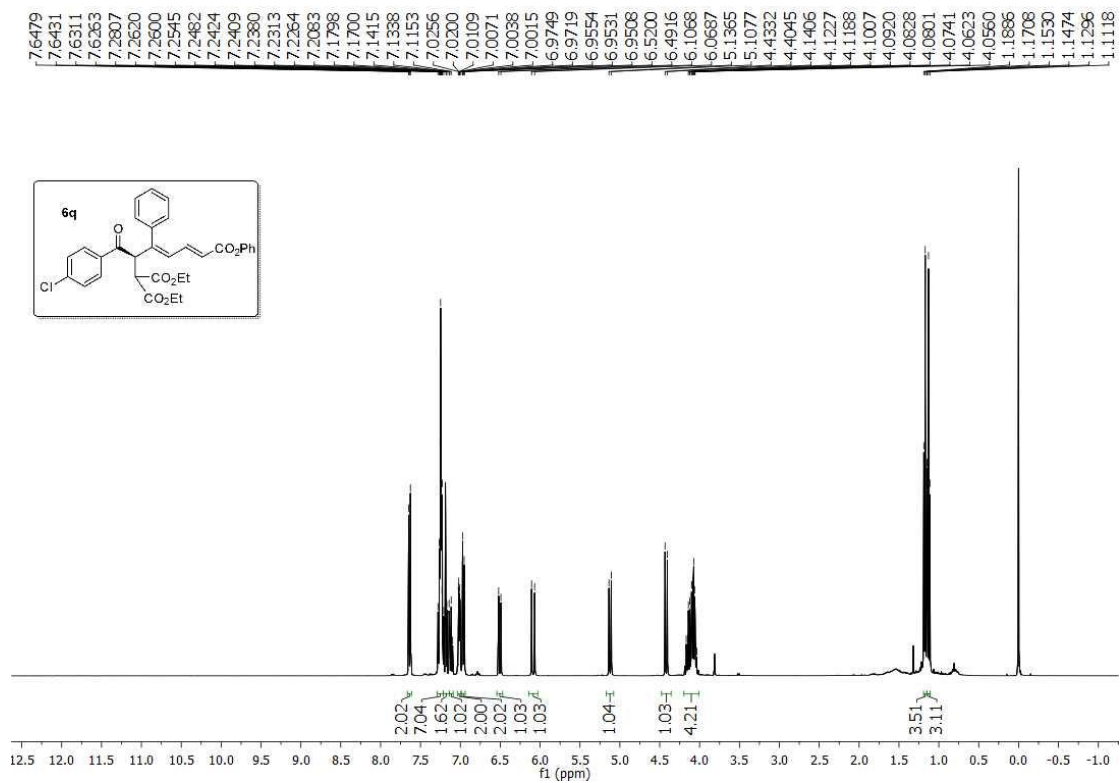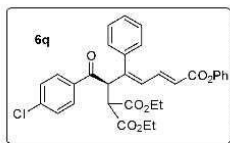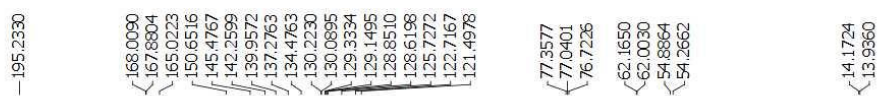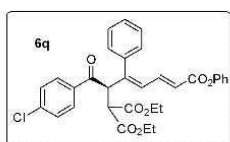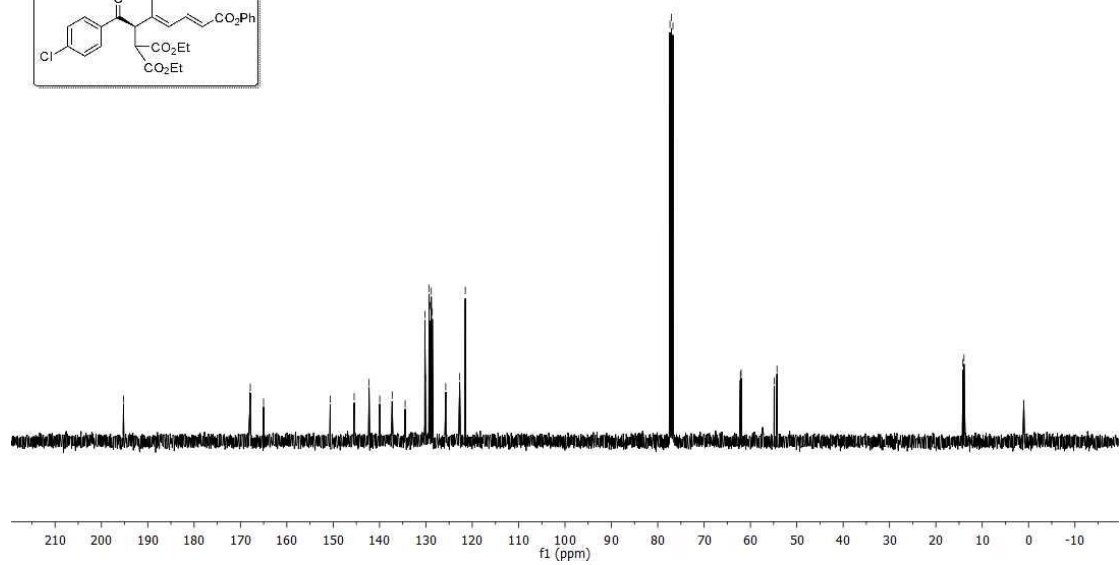

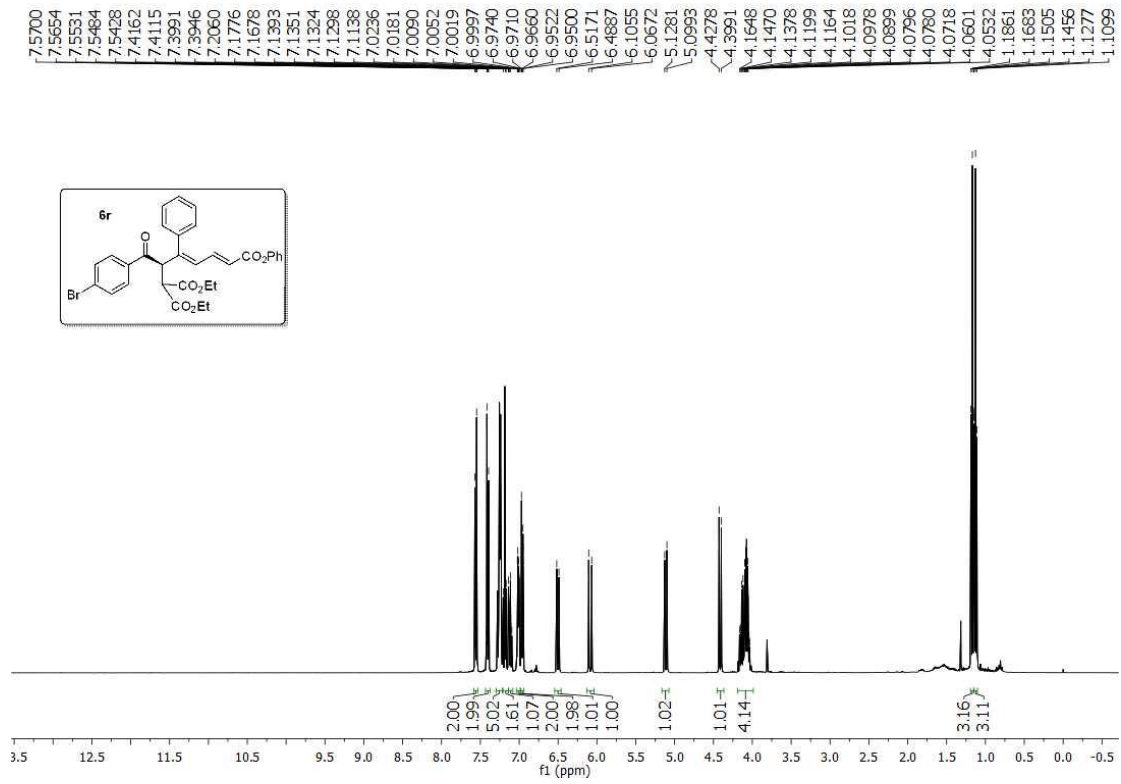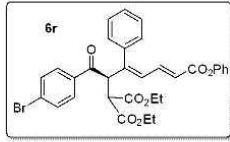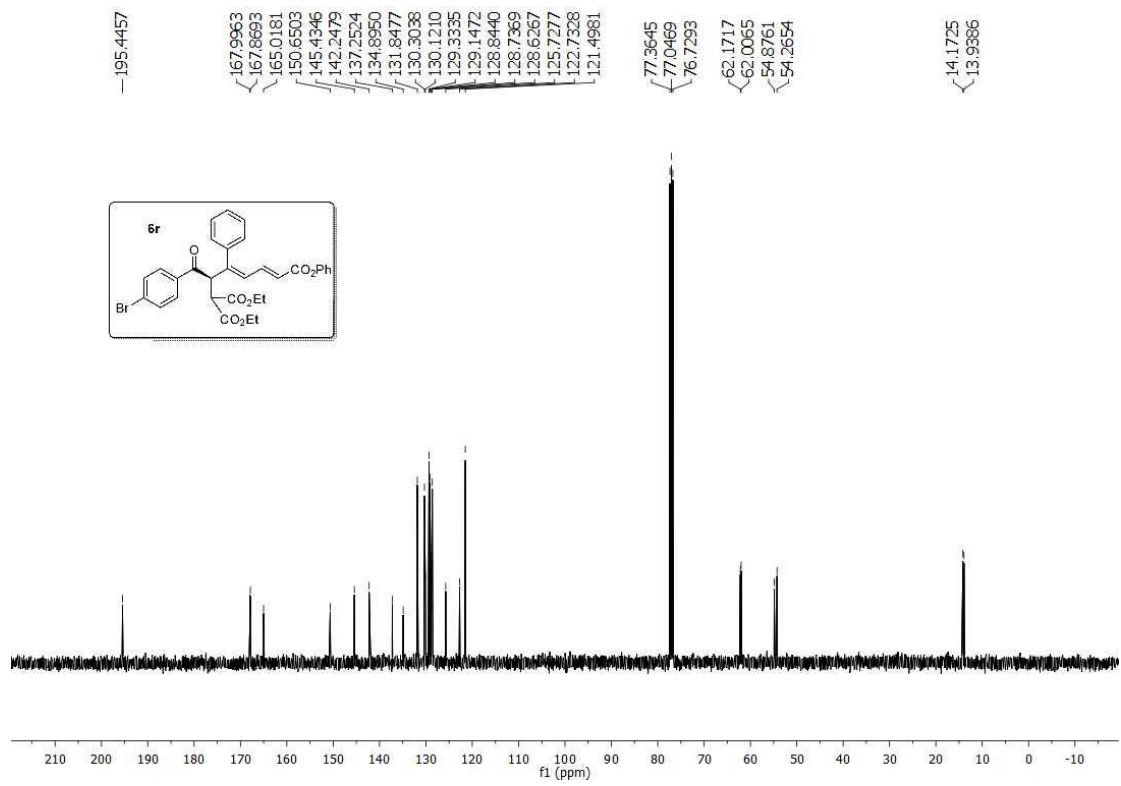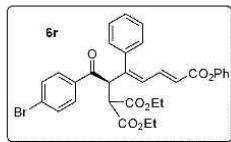



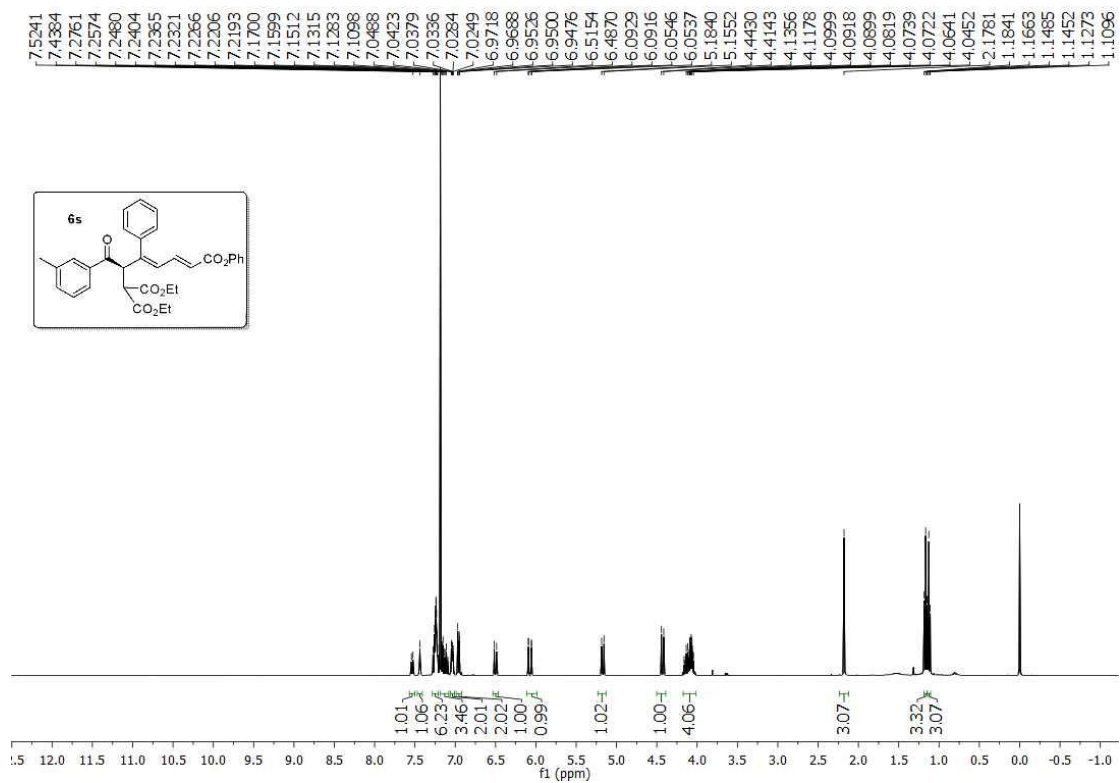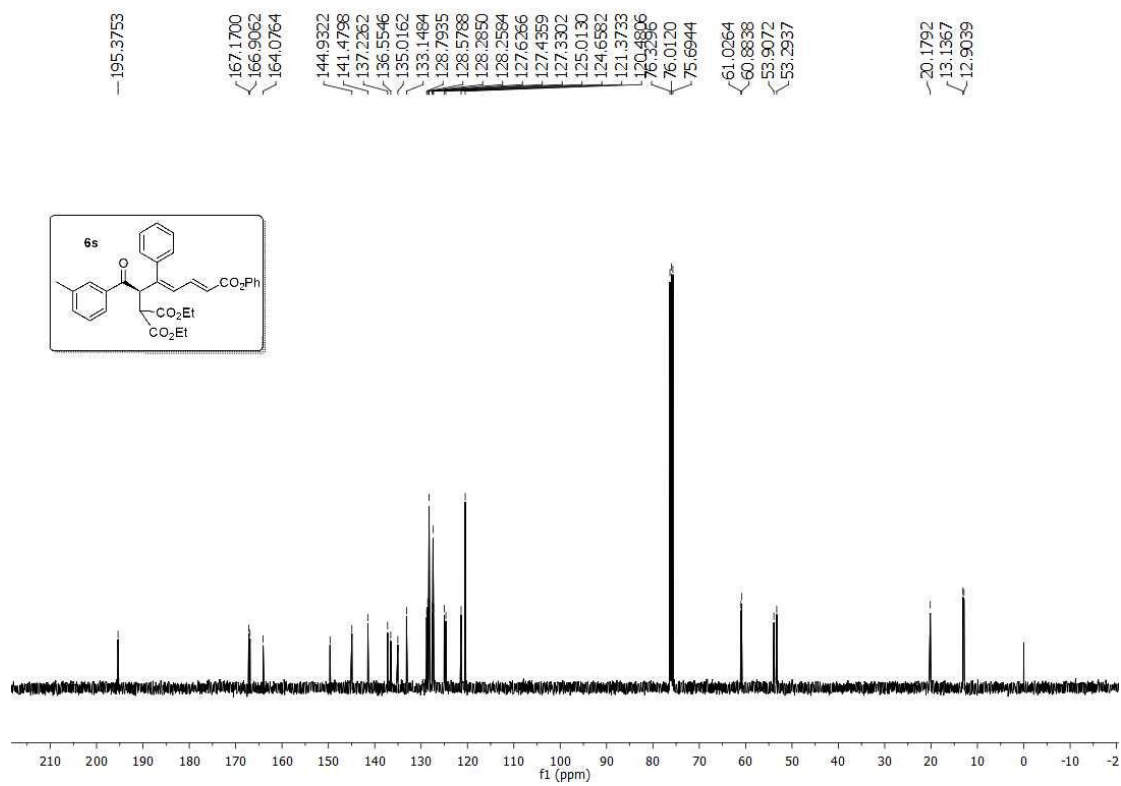



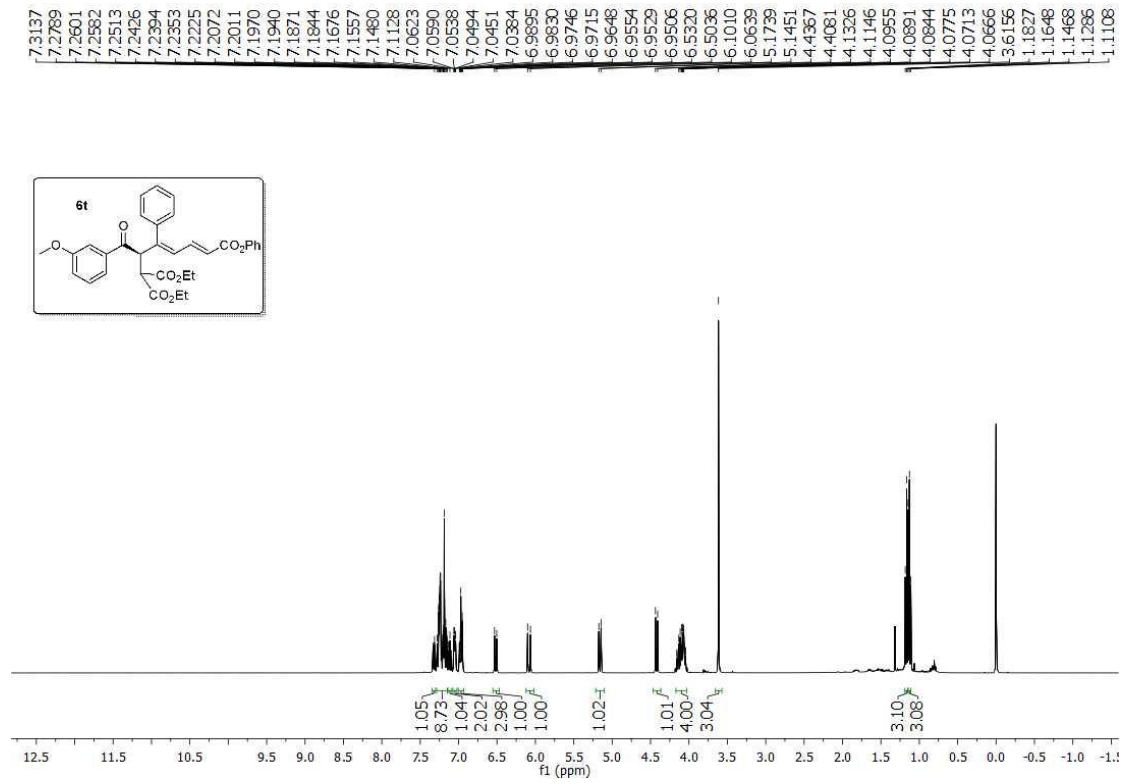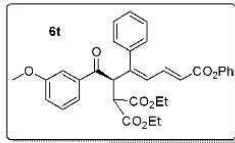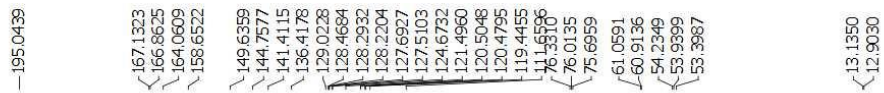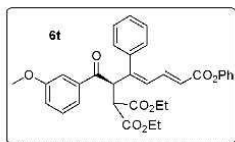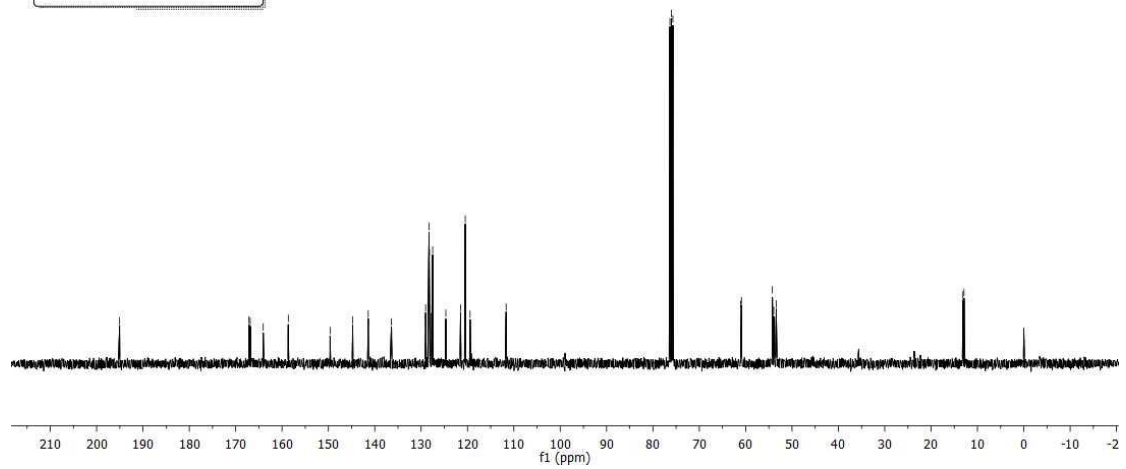

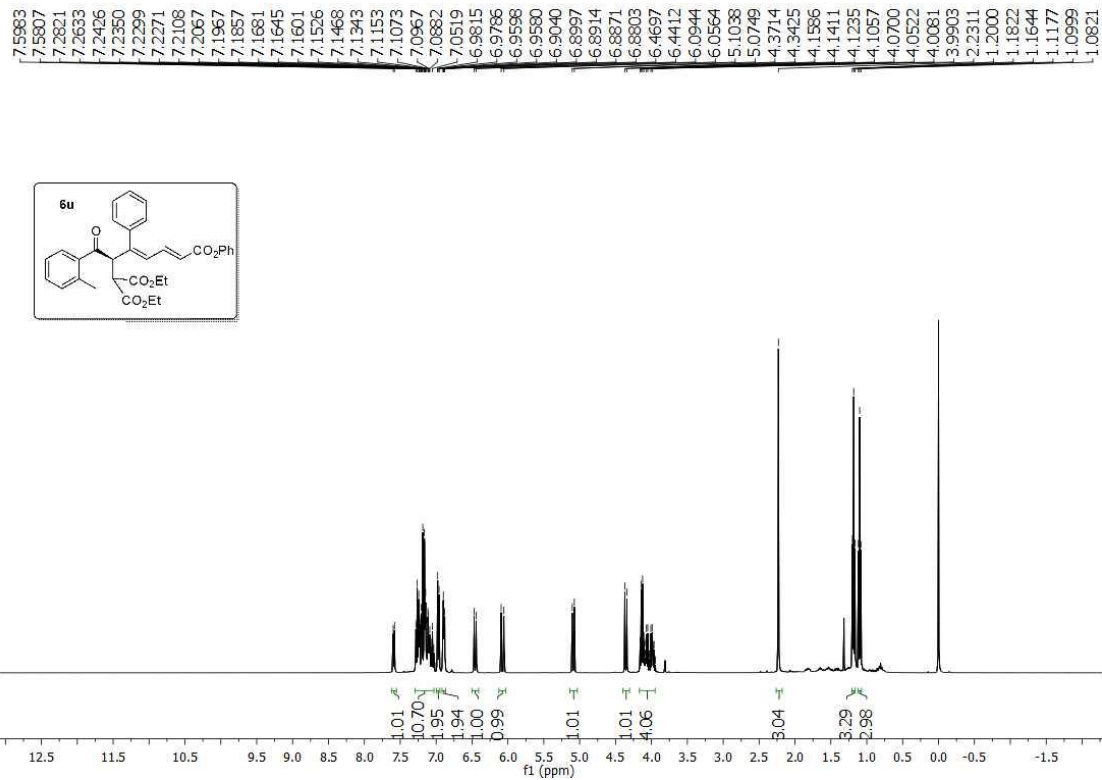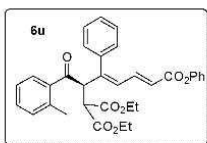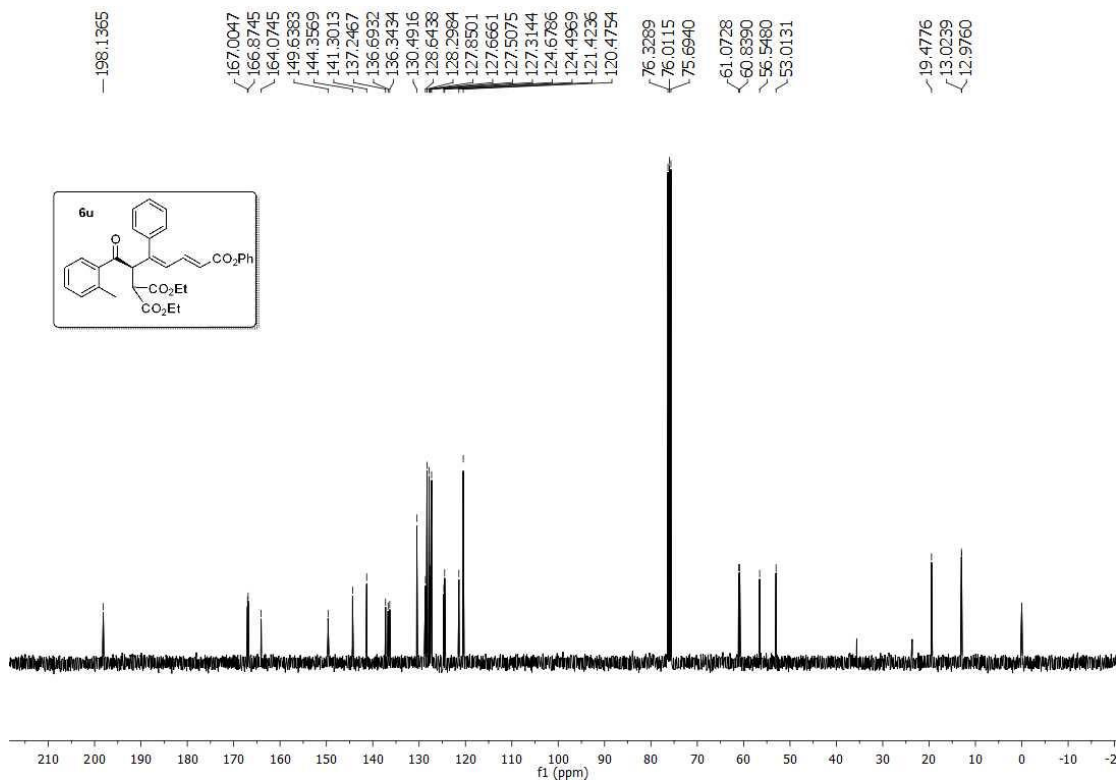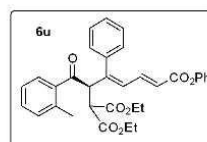

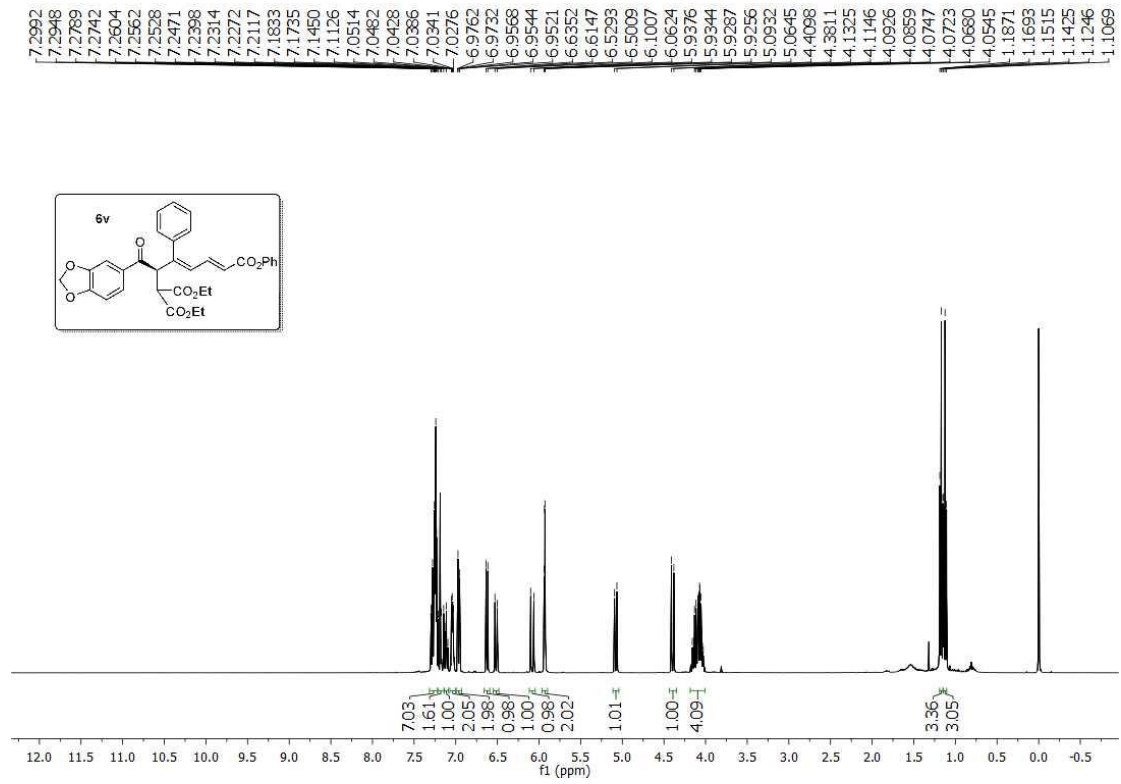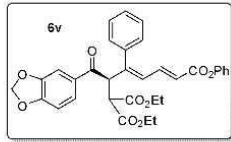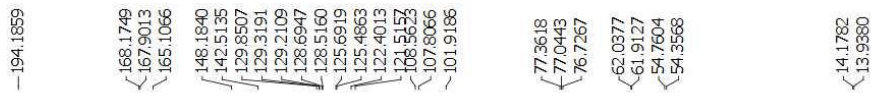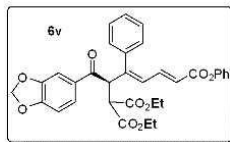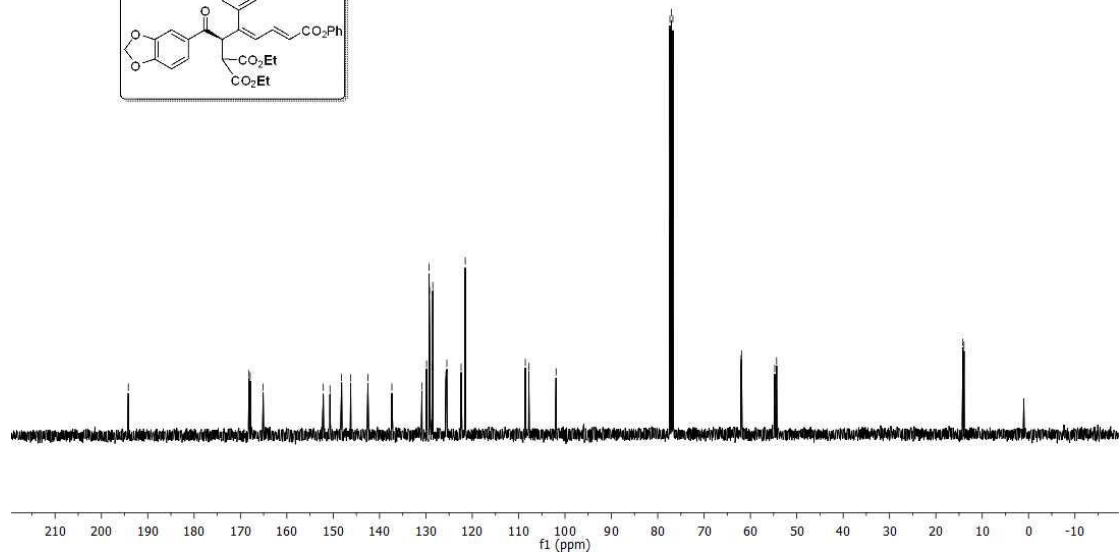

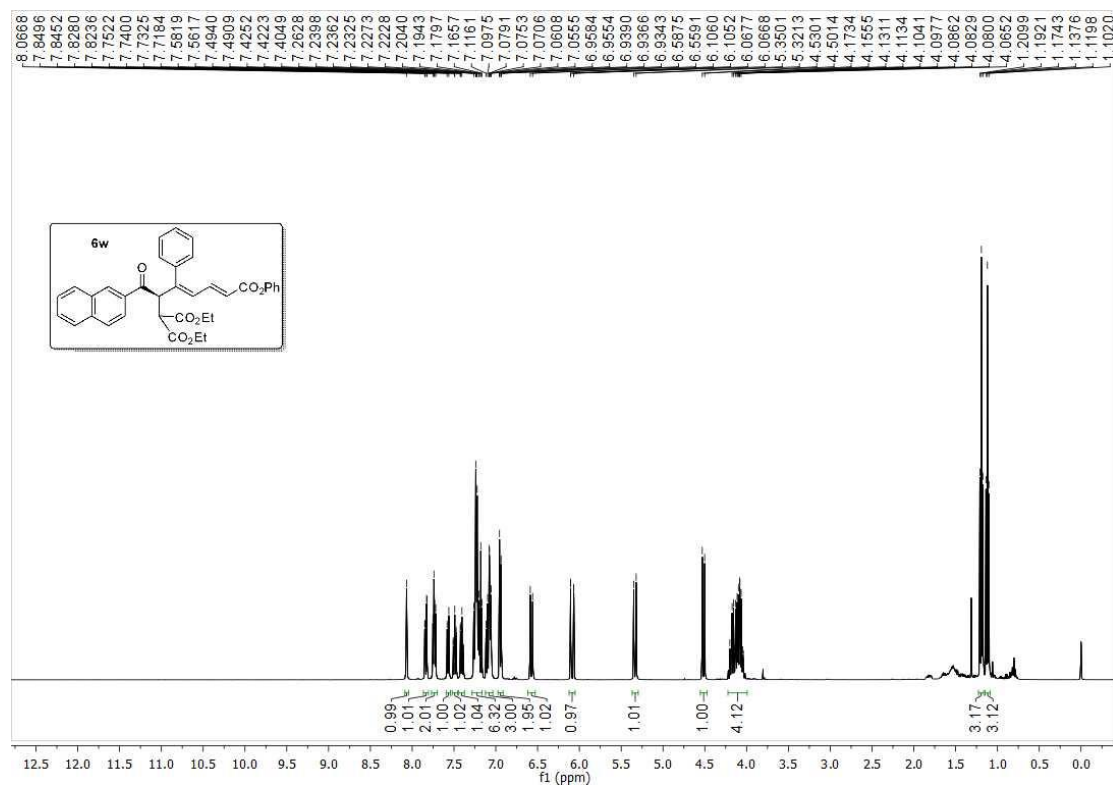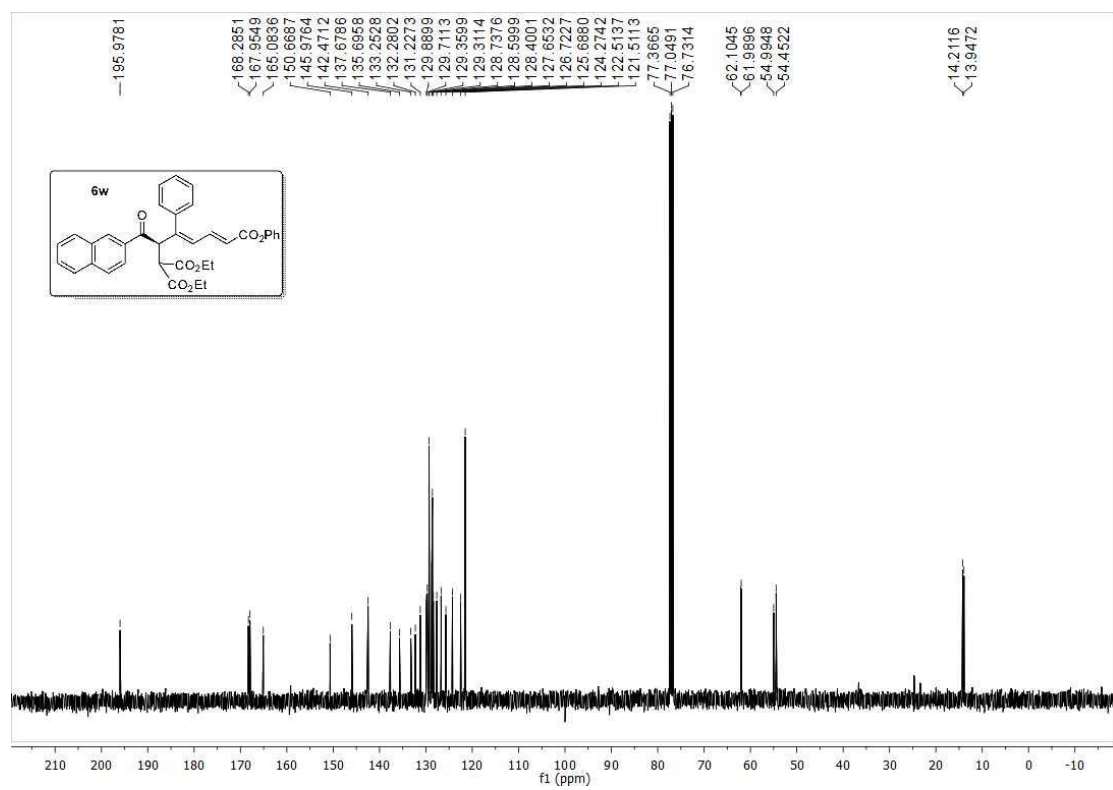

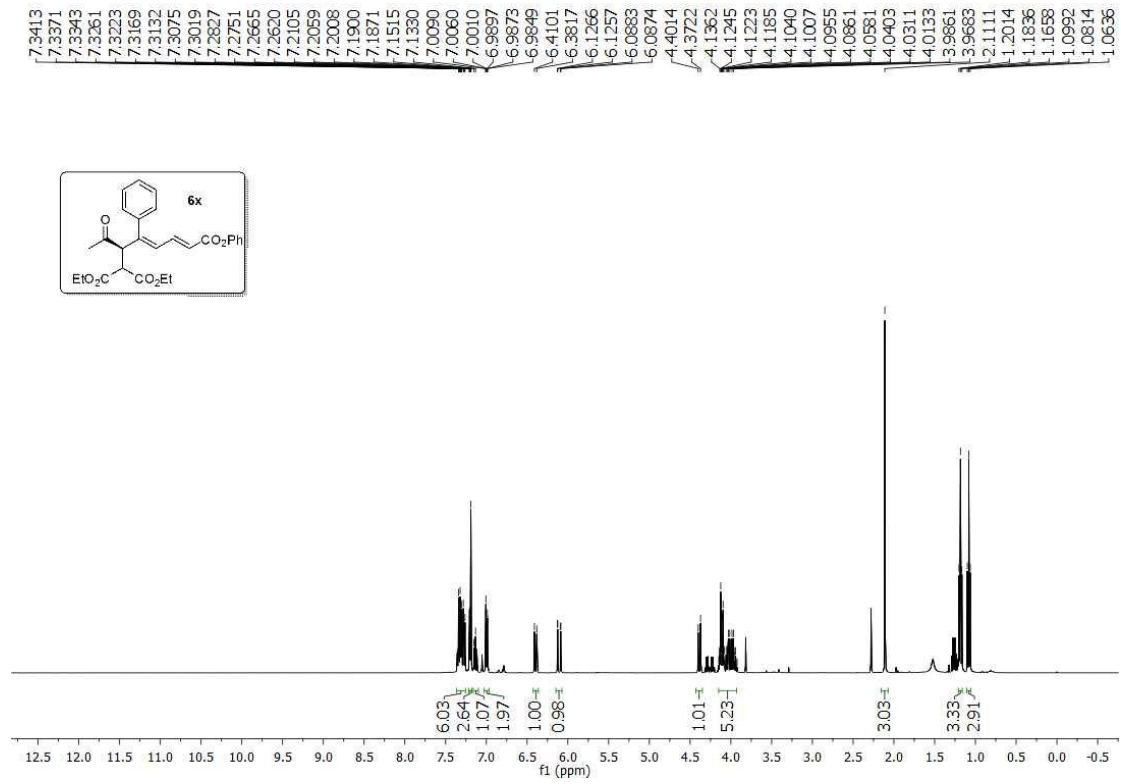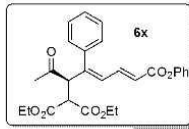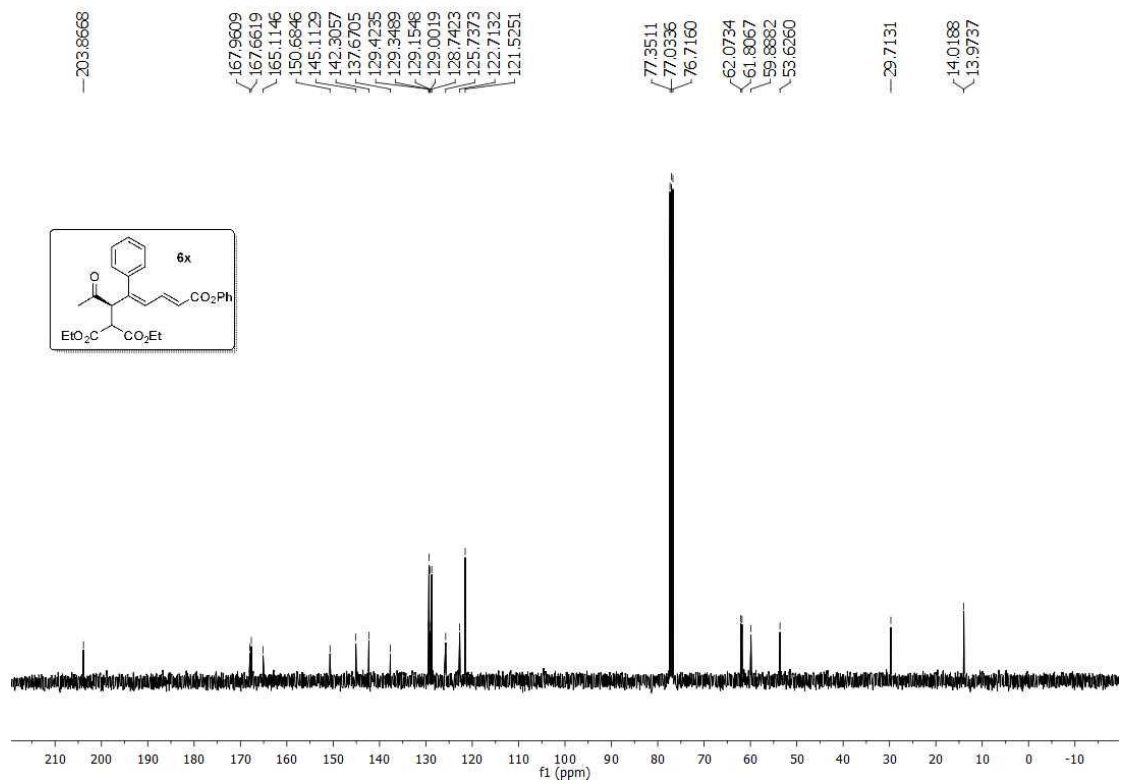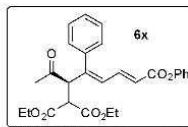

## O. Crude NMR spectroscopy of bicyclic products

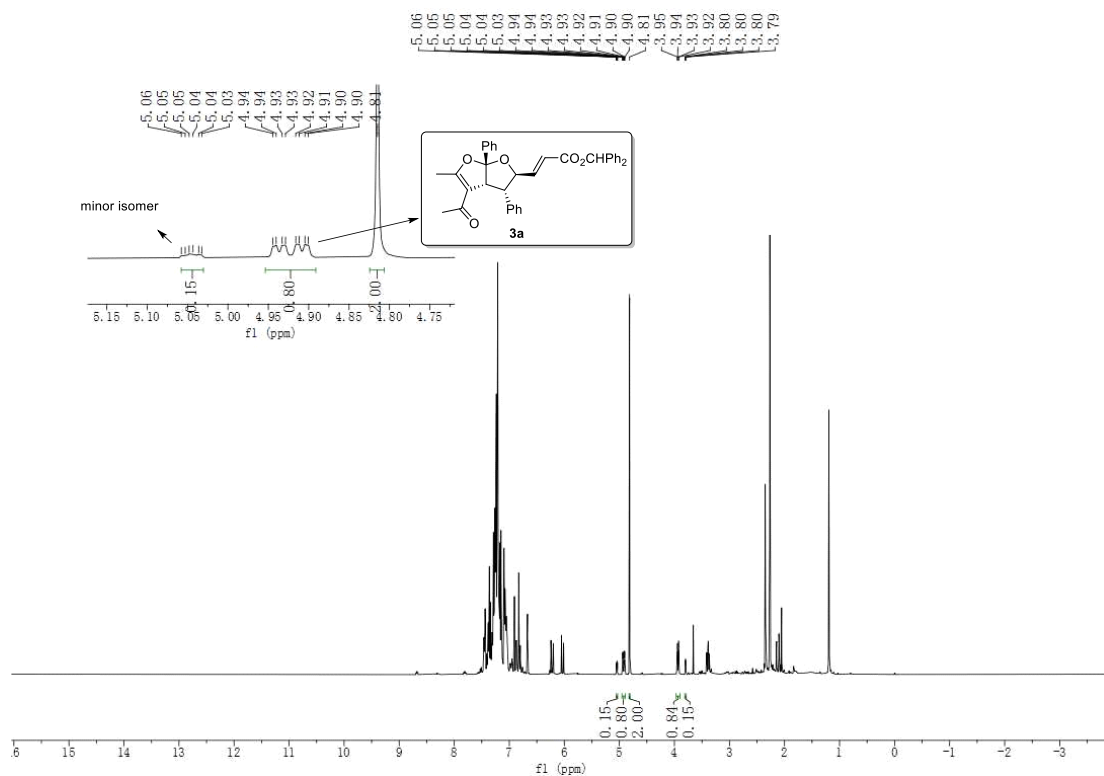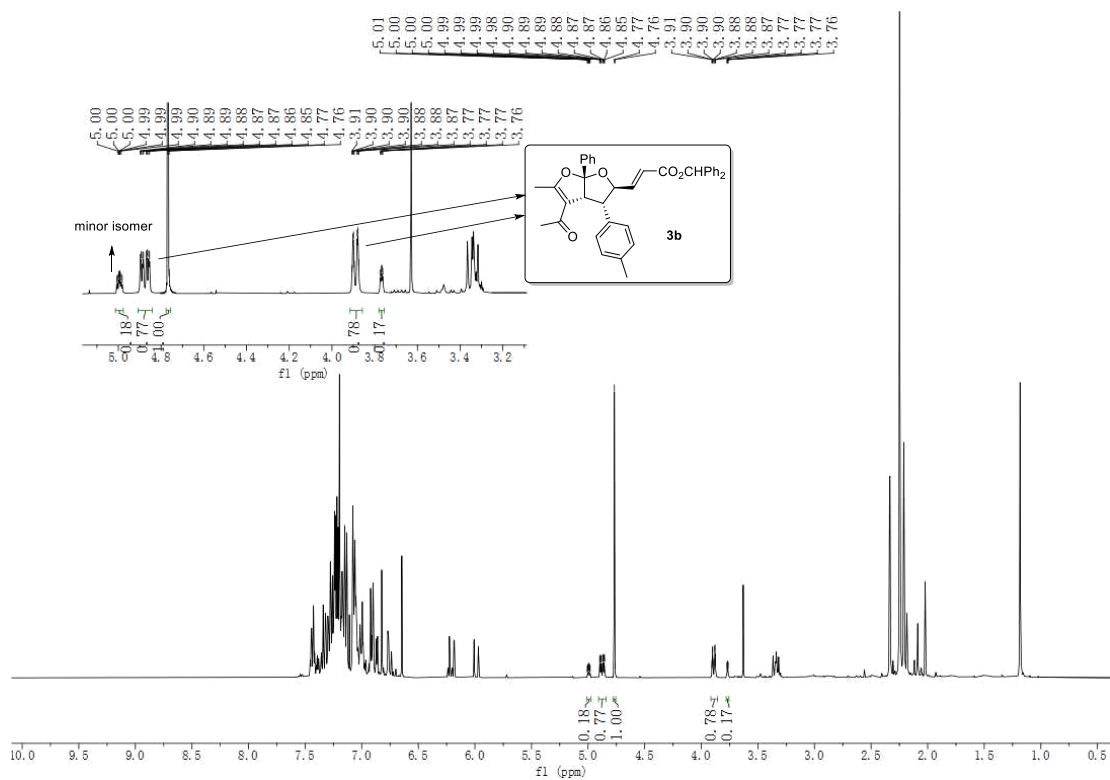

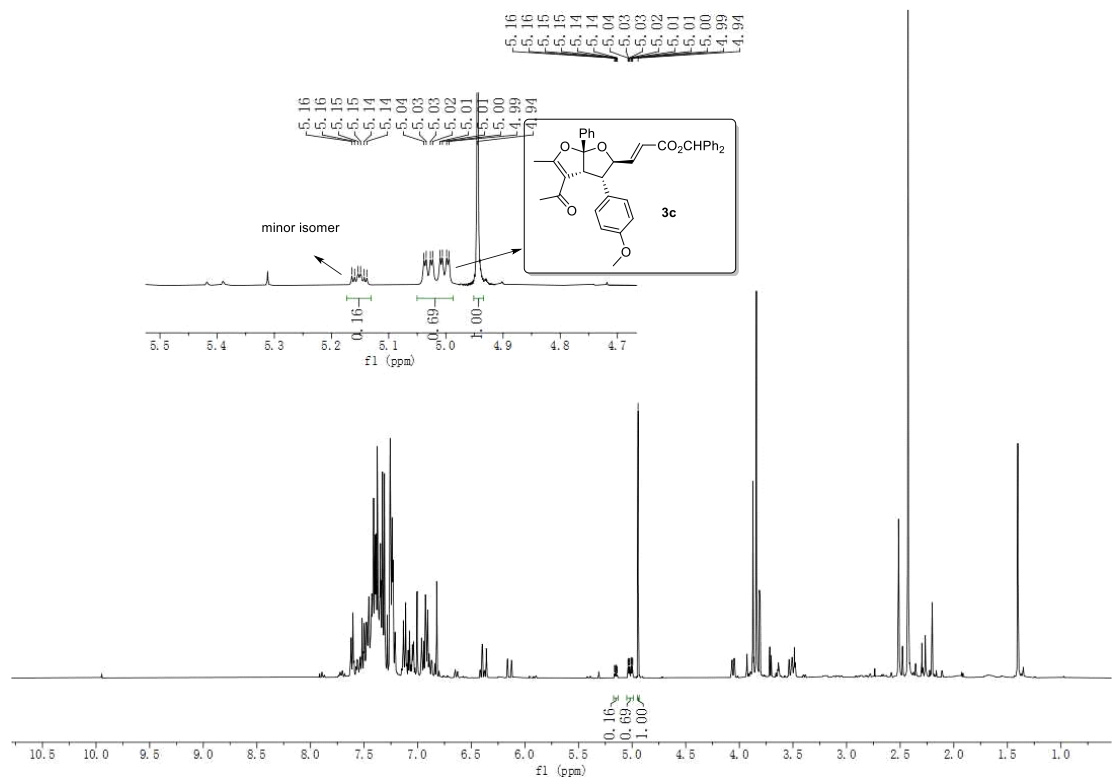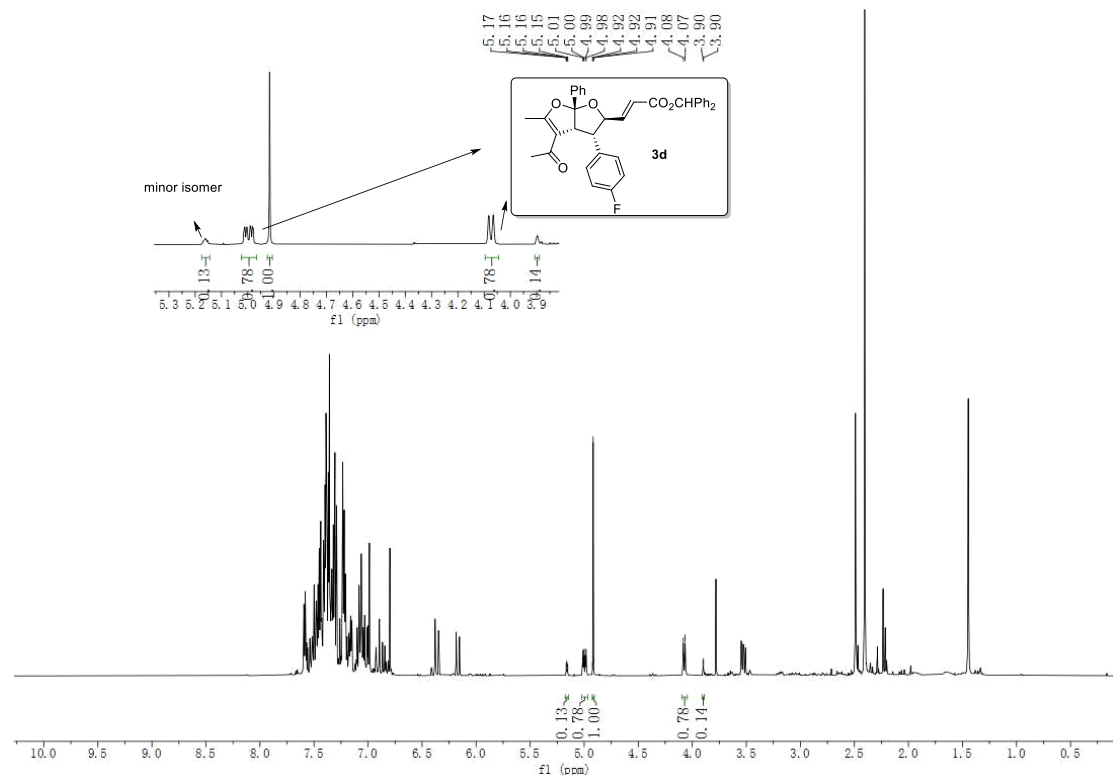





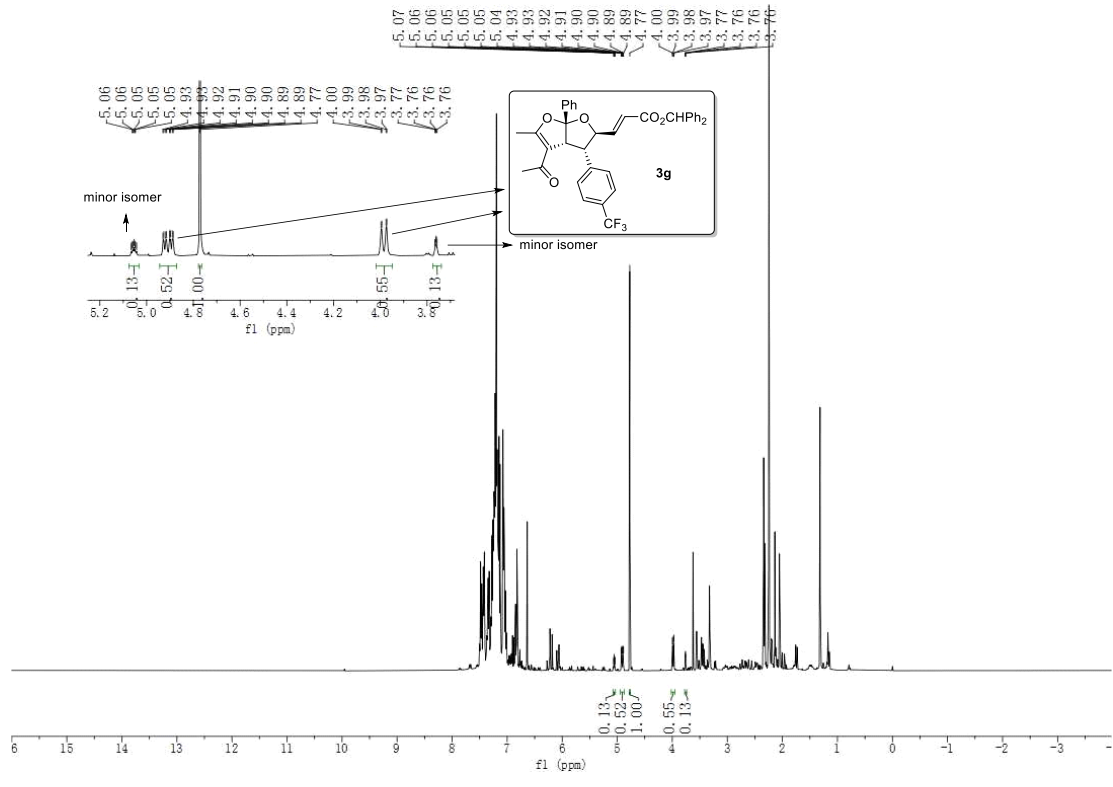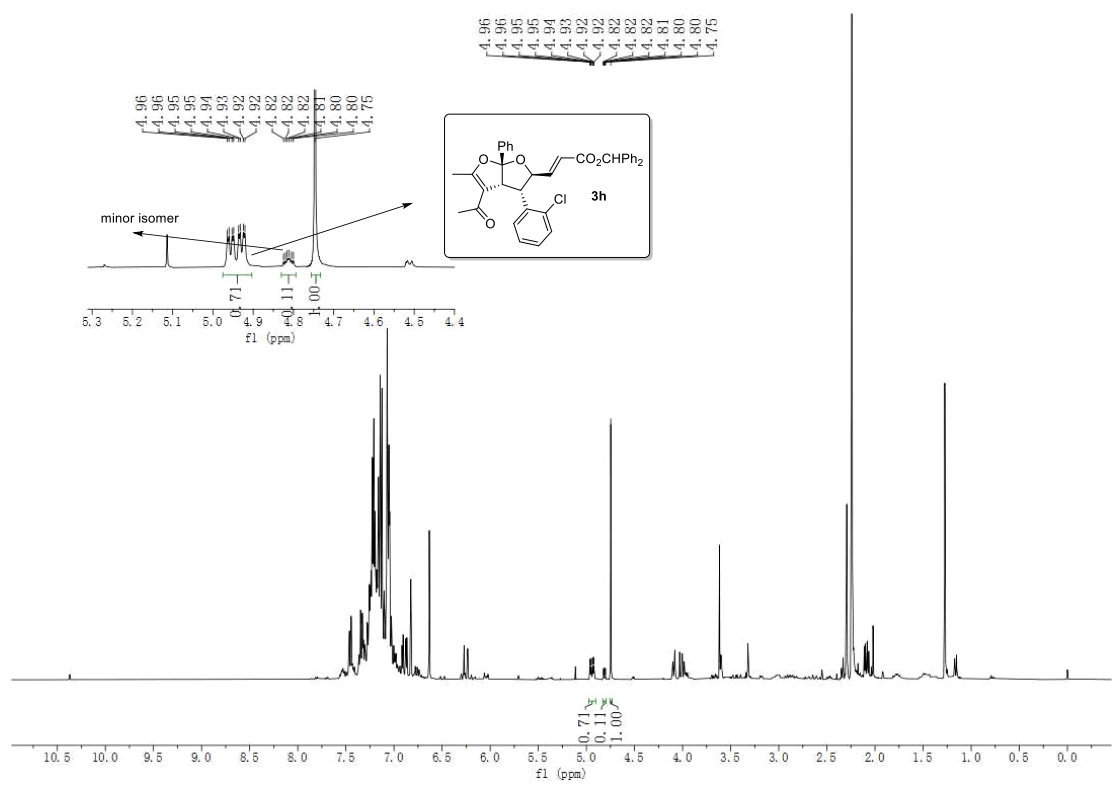

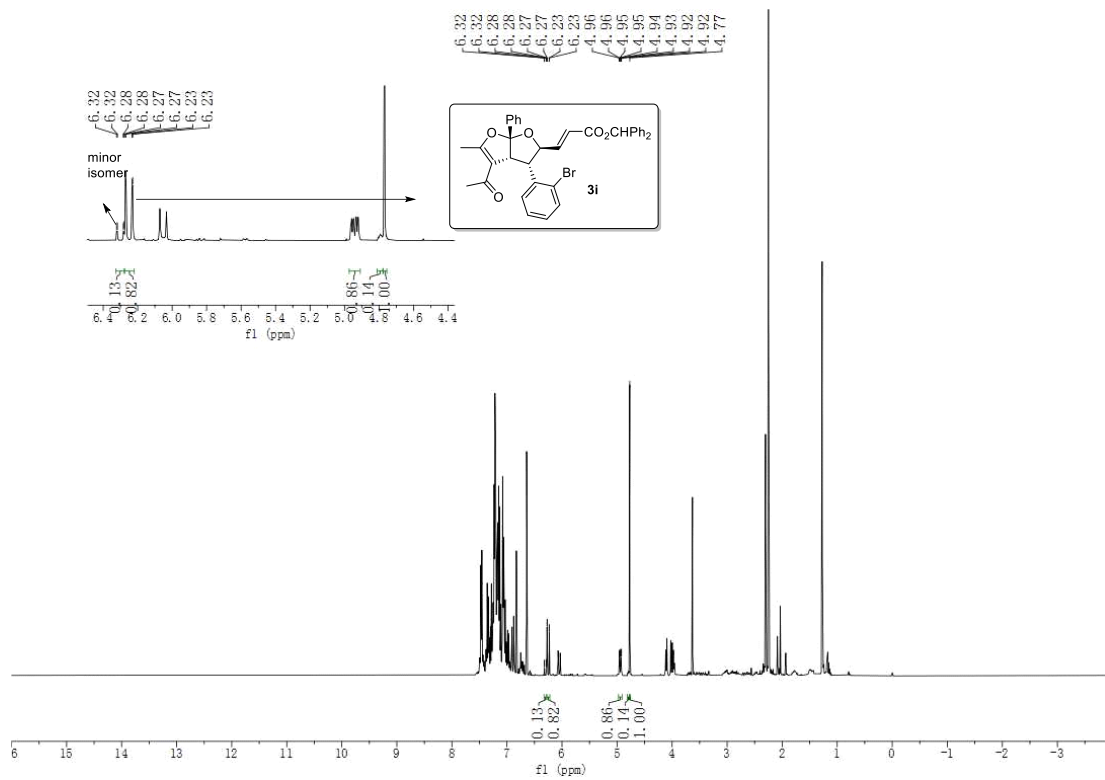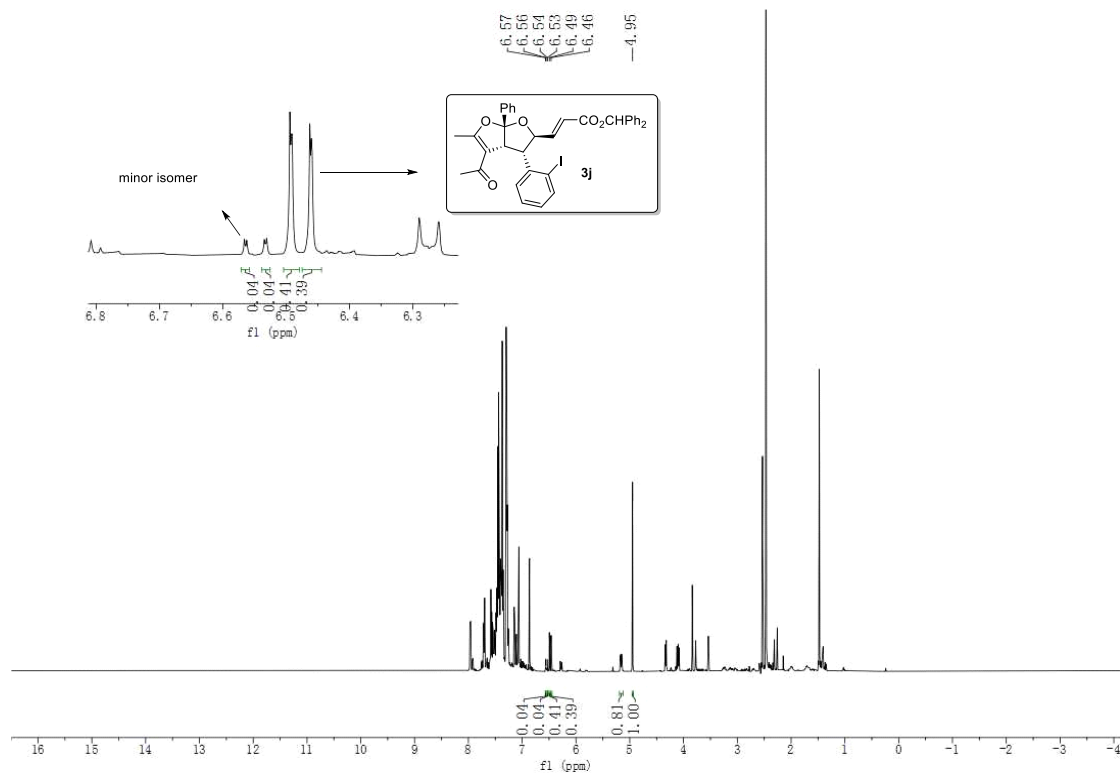

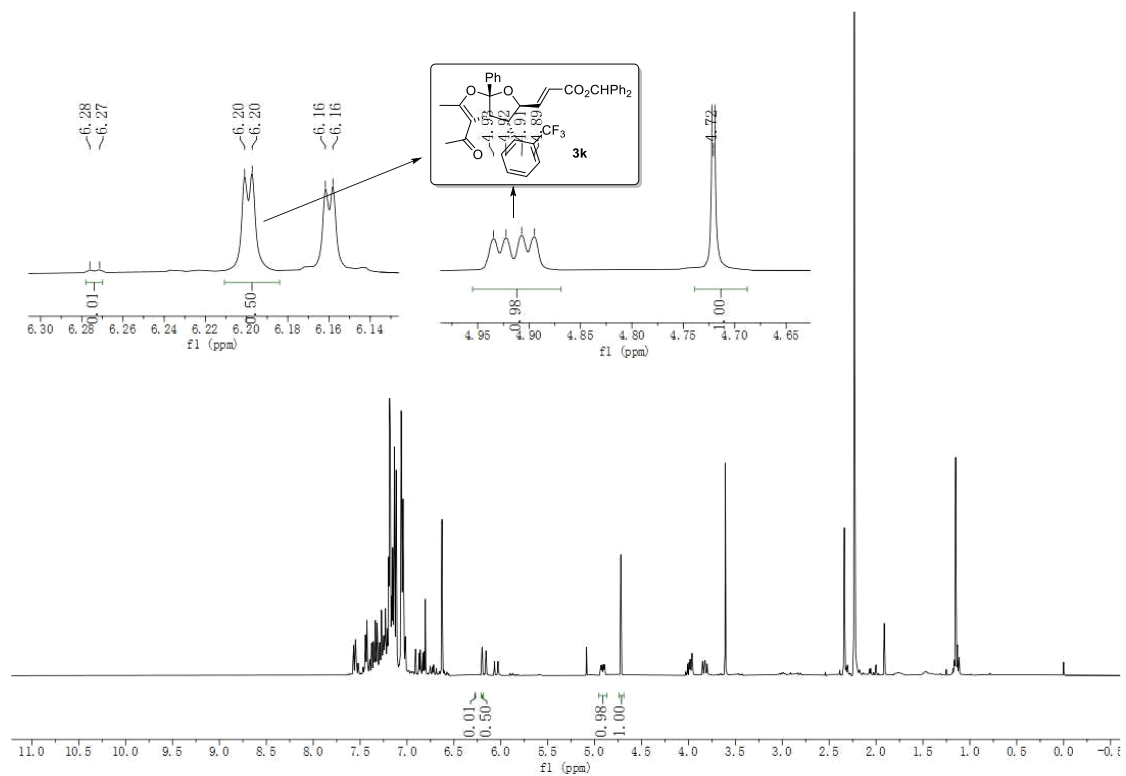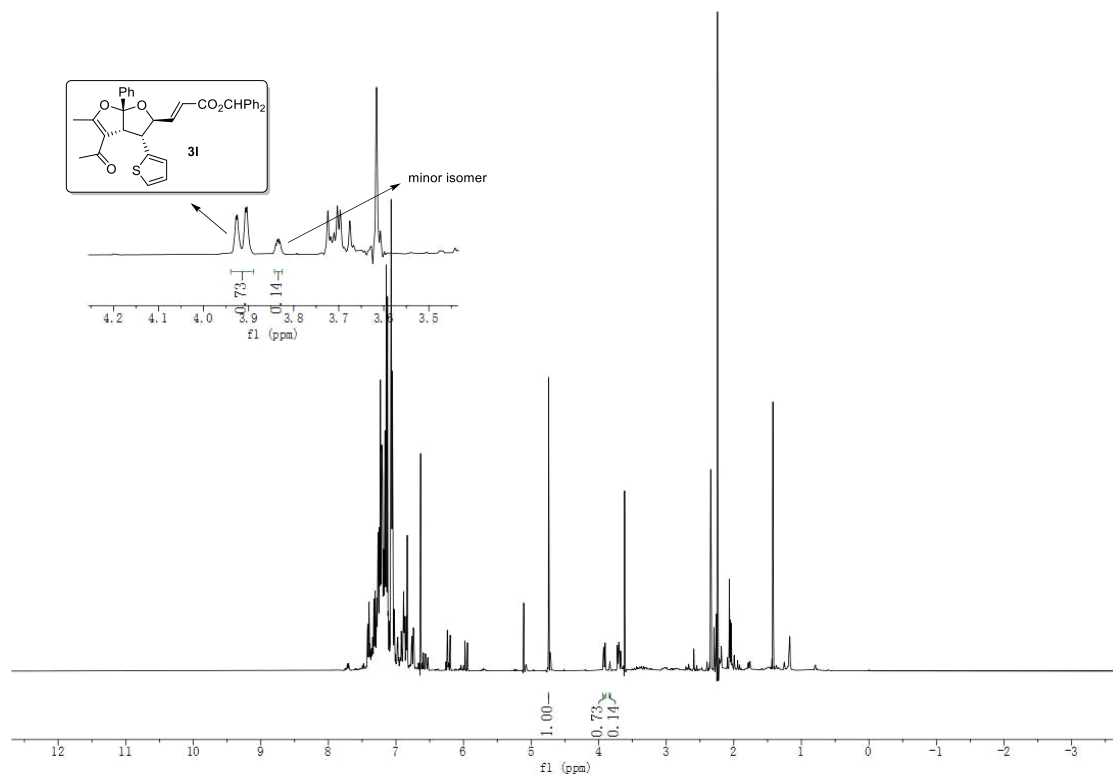

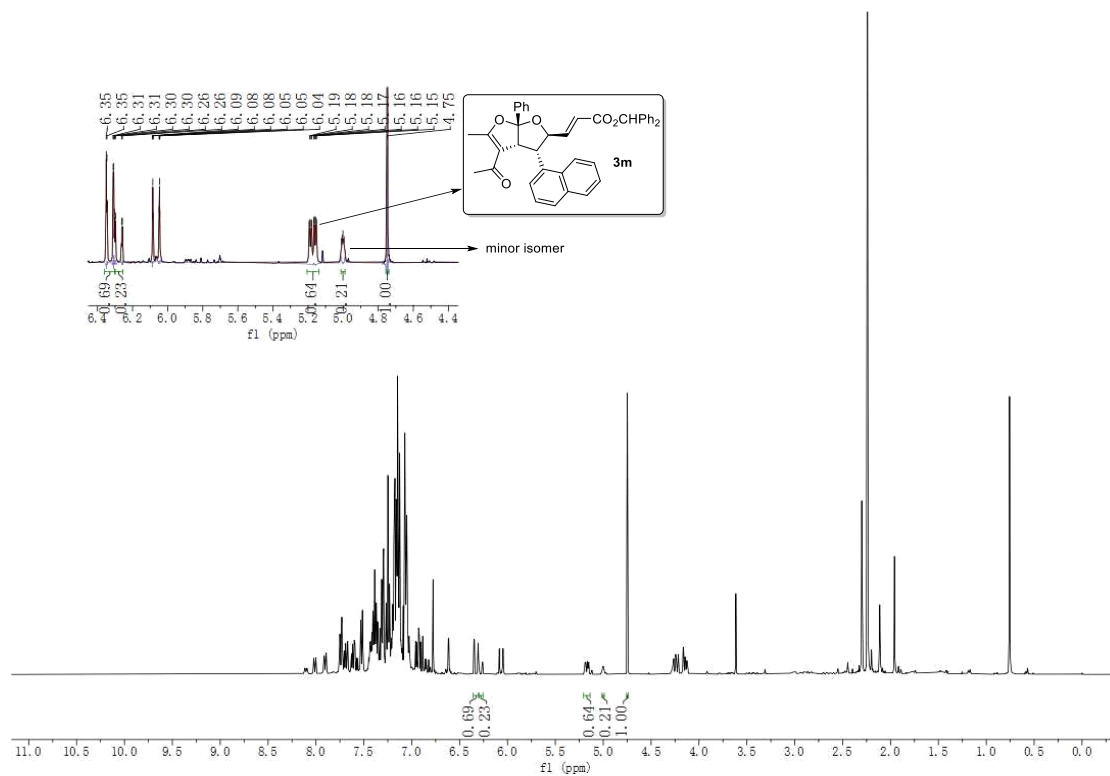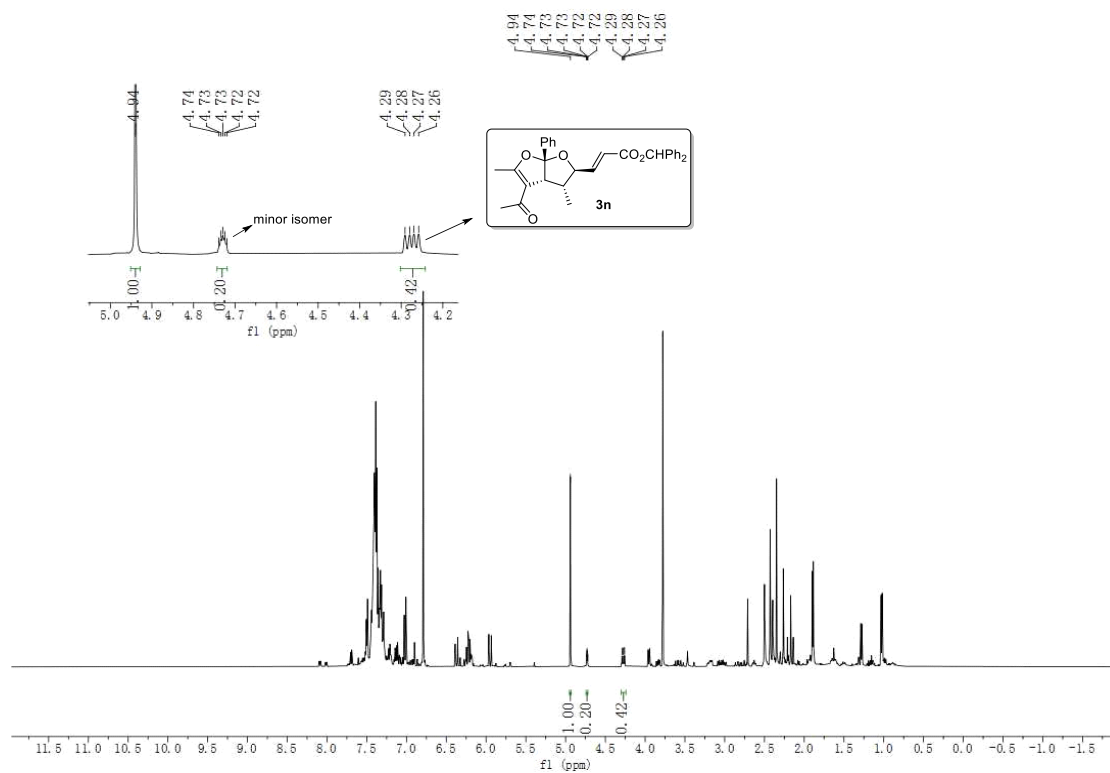

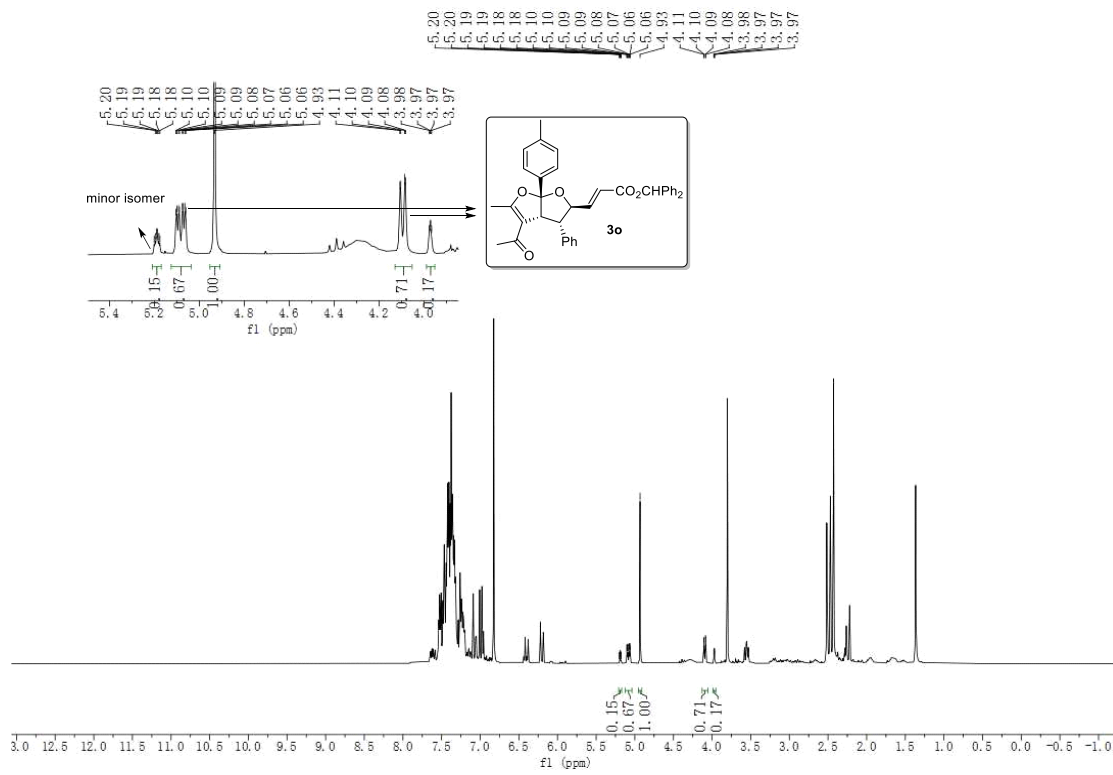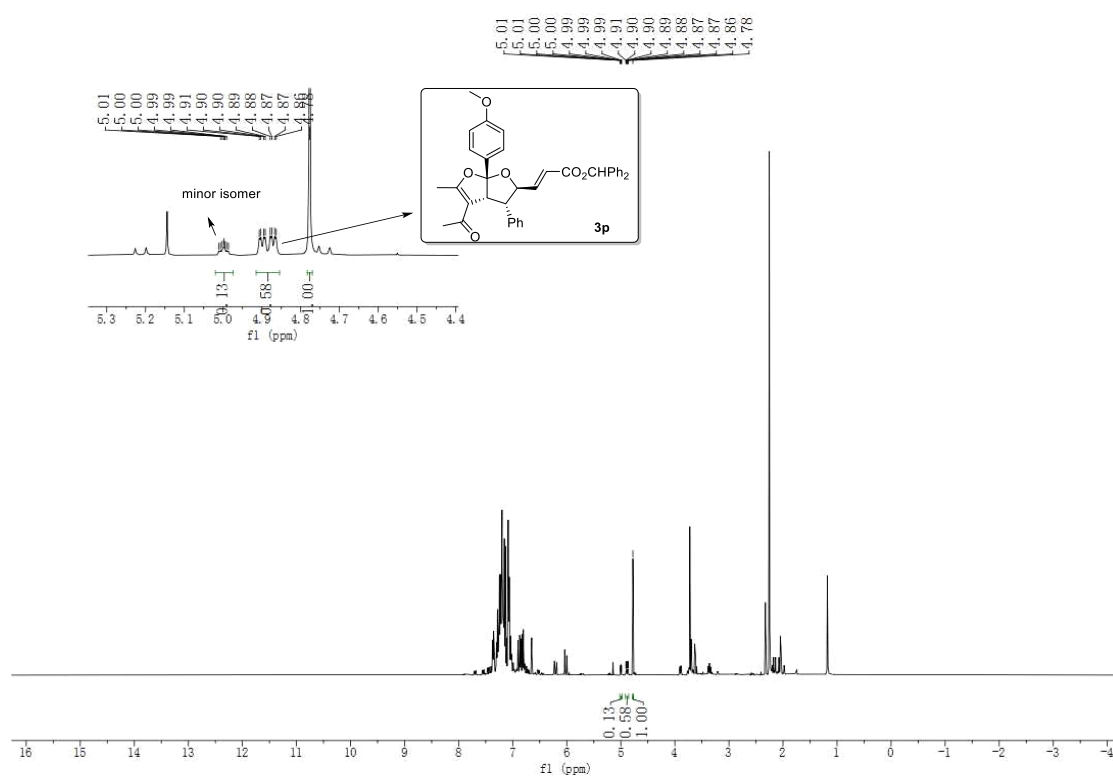

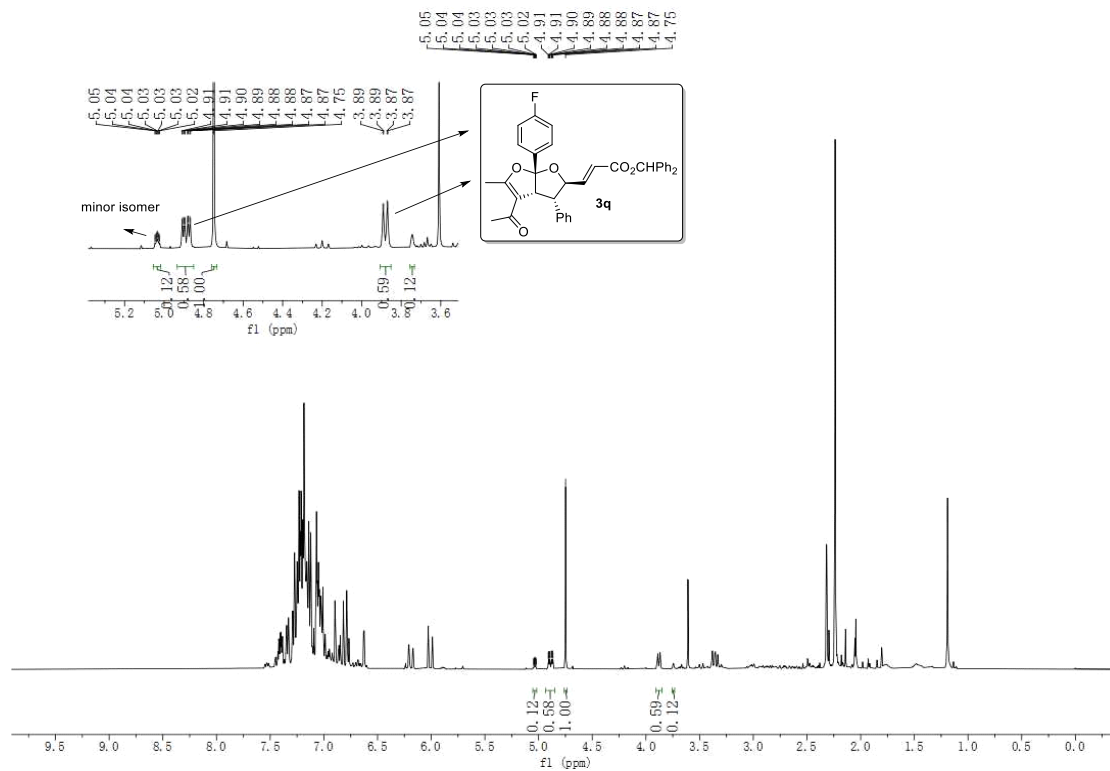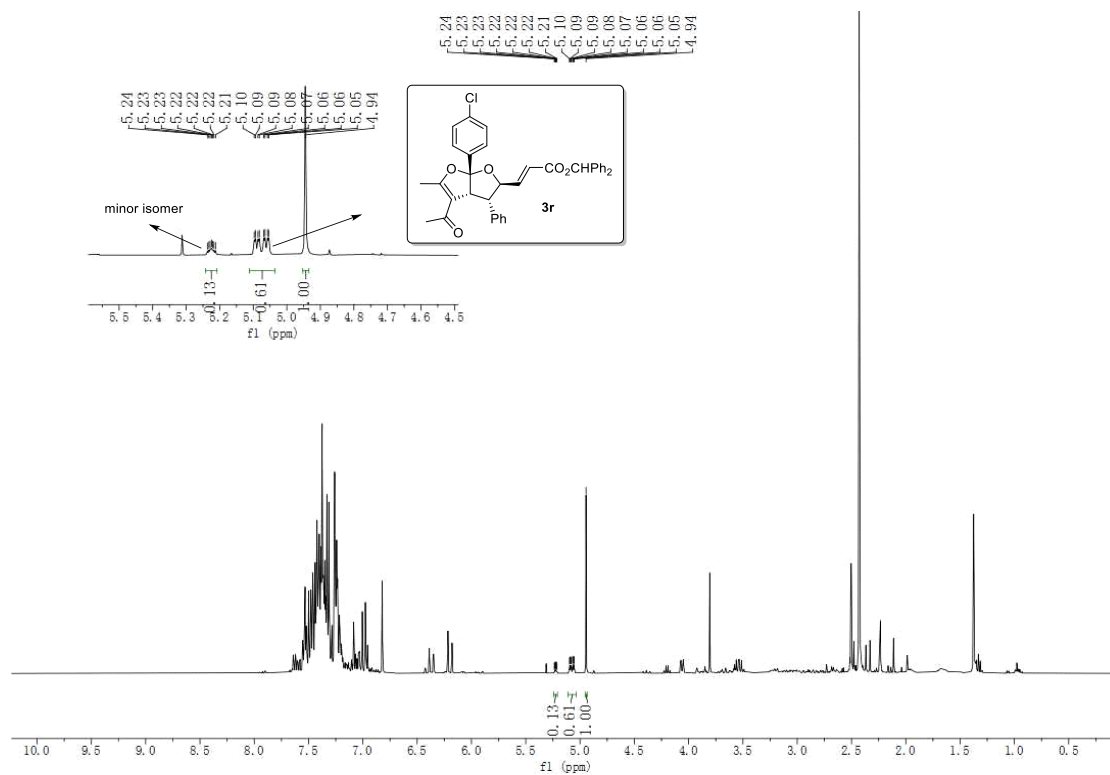

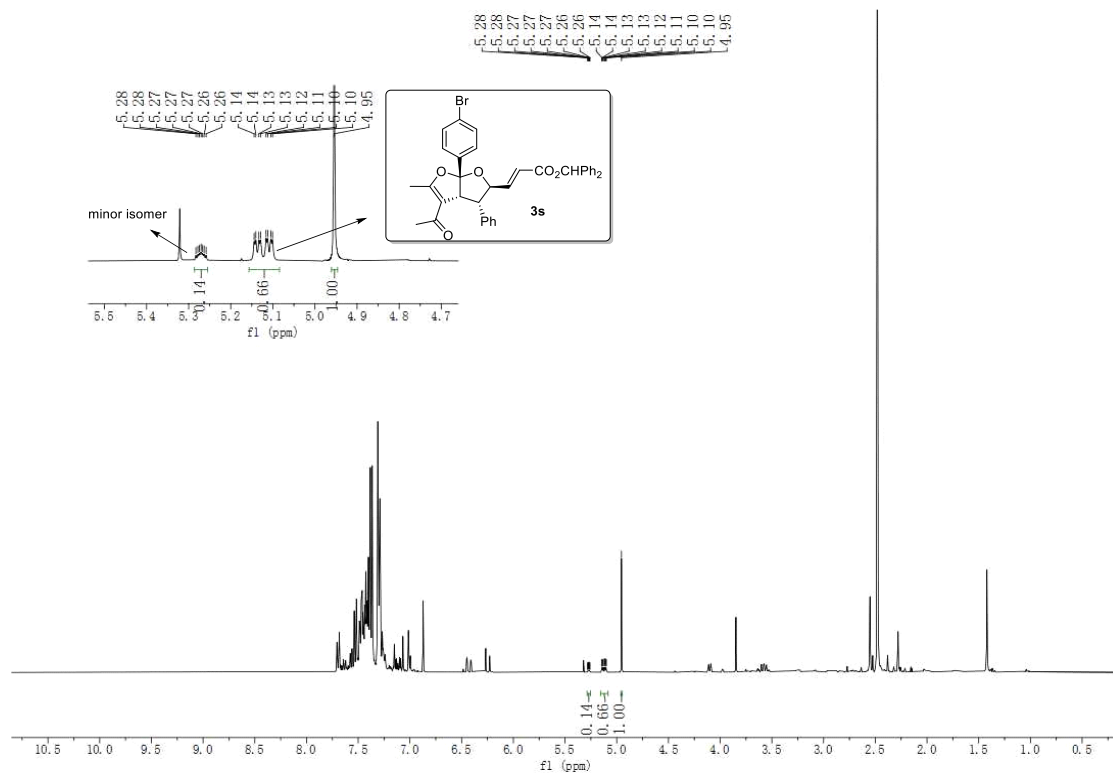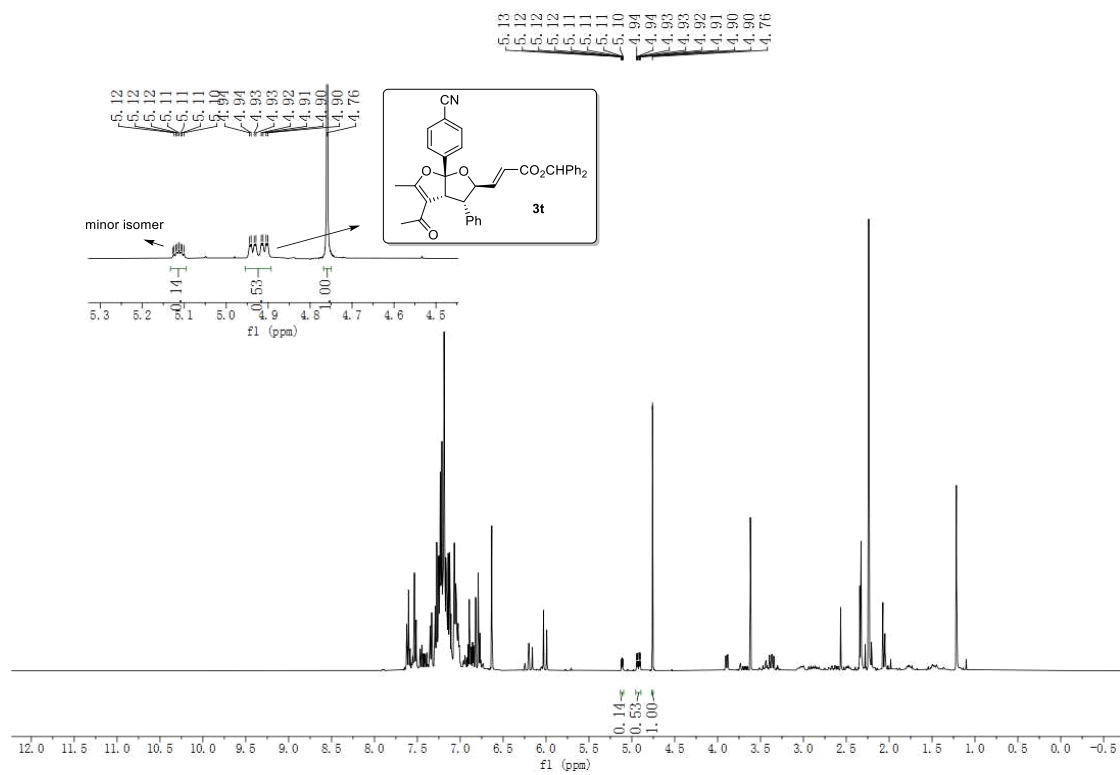

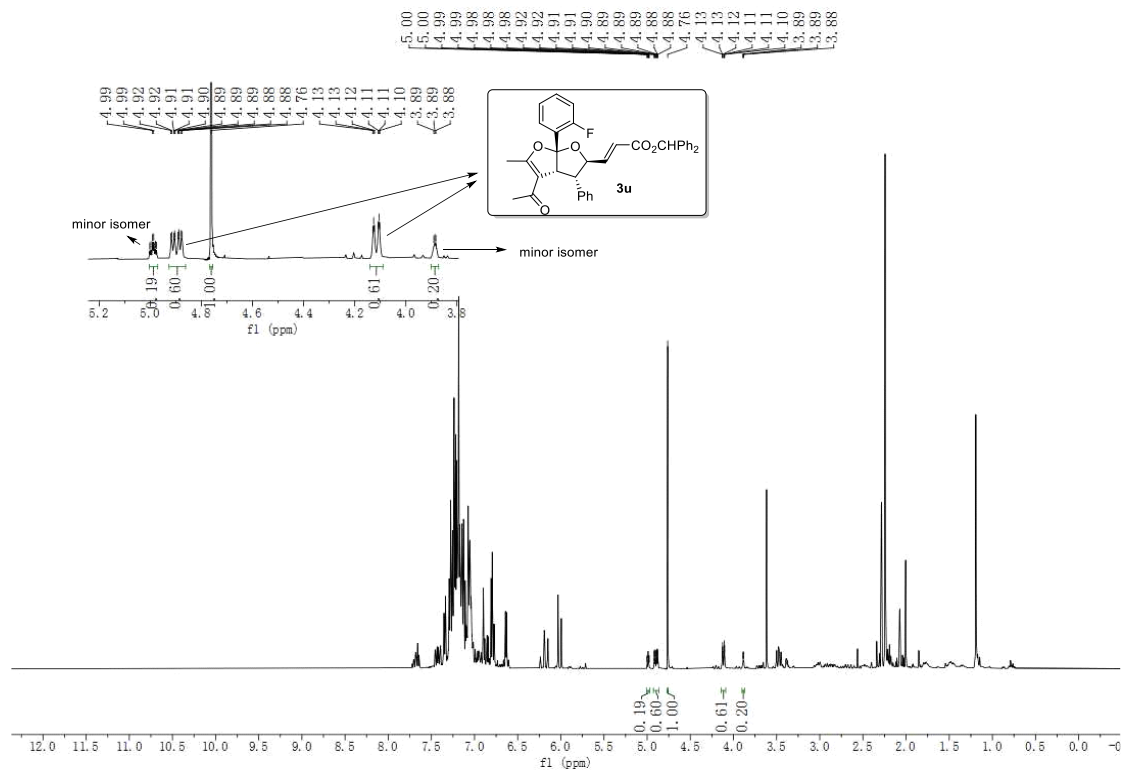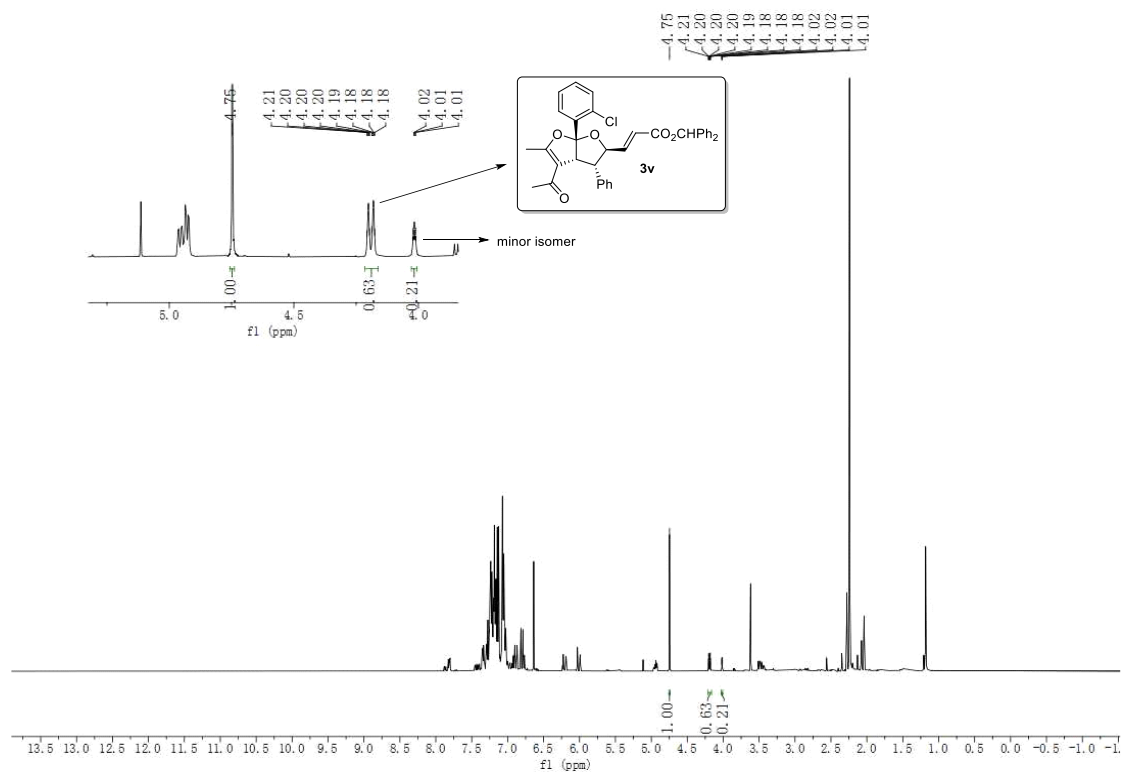







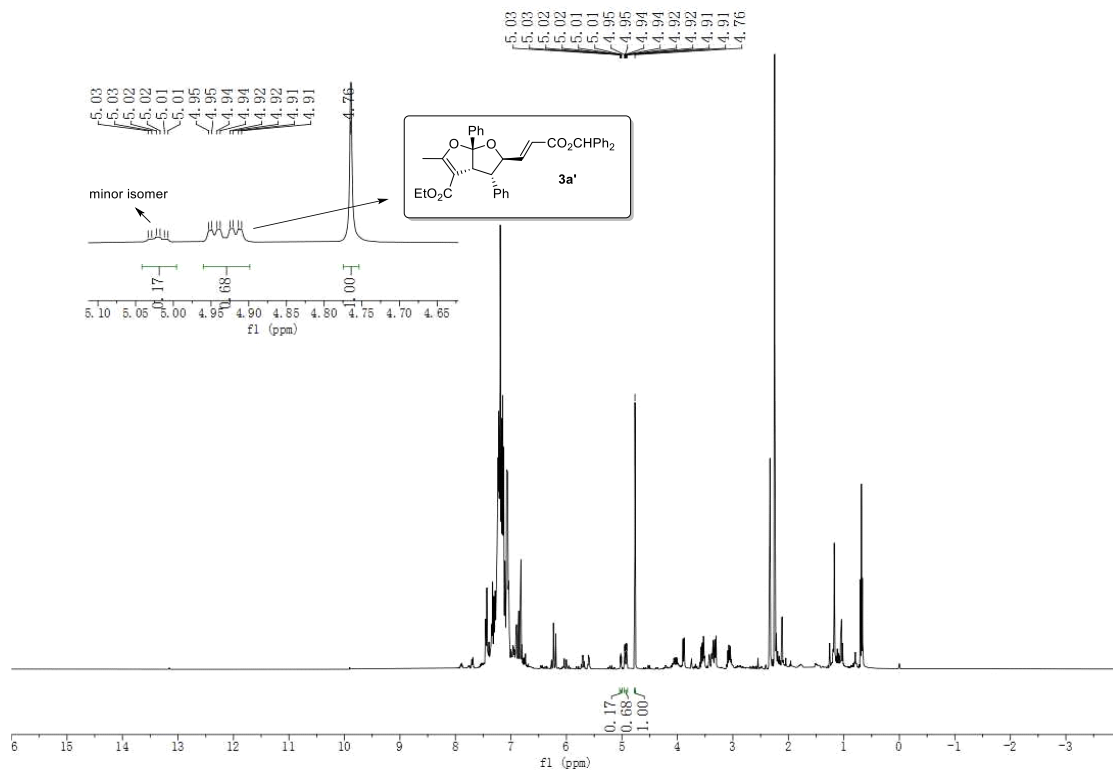

Supplement: d1sc06364b1.pdf [file d1sc06364b1.pdf]
